# Supplementary material for: Multicomponent synthesis of functionalized pyrrolo[3,4- e ]isoindole-1,3,6,8-tetraones via [2 + 2 + 2] cycloaddition of maleimides with nitroenamines
Source: Royal Society of Chemistry journal article supplement (doi:10.1039/d4qo01306a), 2024-01-01
Supplement: d4qo01306a1.pdf [file d4qo01306a1.pdf]

# Multicomponent synthesis of functionalized pyrrolo[3,4-*e*] isoindole-1,3,6,8-tetraones via [2+2+2] cycloaddition of maleimides with nitroenamines

Jia-Ming Yang, Bi-Na Shao, Xing-Mei Hu, Jian-Bo Ma, Jin Liu\*, Sheng-Jiao Yan\*

*Key Laboratory of Medicinal Chemistry for Natural Resources, Ministry of Education; Yunnan Provincial Center for Research & Development of Natural Products; School of Chemical Science and Technology, Yunnan University, Kunming, 650091, P. R. China*

## Supporting Information

### Table of Contents:

|                                                                                                          |    |
|----------------------------------------------------------------------------------------------------------|----|
| General Information.....                                                                                 | 4  |
| General Procedure for the Preparation of <b>3</b> .....                                                  | 4  |
| The gram-scale experiment.....                                                                           | 5  |
| Spectroscopic Data of <b>3a-3k'</b> .....                                                                | 6  |
| The proposed mechanism of the cascade reaction.....                                                      | 25 |
| <b>Scheme S1.</b> The proposed mechanism of the cascade reaction.....                                    | 25 |
| Verification of reaction mechanisms.....                                                                 | 25 |
| X-ray Structure and Data of <b>3n</b> .....                                                              | 26 |
| <b>Figure S1.</b> X-Ray crystal structure of <b>3n</b> .....                                             | 26 |
| <b>Table S1.</b> Crystal data and structure refinement for <b>3n</b> .....                               | 27 |
| <b>Table S2.</b> Bond Lengths for <b>3n</b> .....                                                        | 28 |
| <b>Table S3.</b> Bond Angles for <b>3n</b> .....                                                         | 30 |
| <b>Figure S2.</b> <sup>1</sup> H NMR (500 MHz, CDCl <sub>3</sub> ) spectra of compound <b>3a</b> .....   | 34 |
| <b>Figure S3.</b> <sup>13</sup> C NMR (125 MHz, CDCl <sub>3</sub> ) spectra of compound <b>3a</b> .....  | 35 |
| <b>Figure S4.</b> <sup>1</sup> H NMR (500 MHz, CDCl <sub>3</sub> ) spectra of compound <b>3b</b> .....   | 36 |
| <b>Figure S5.</b> <sup>13</sup> C NMR (125 MHz, CDCl <sub>3</sub> ) spectra of compound <b>3b</b> .....  | 37 |
| <b>Figure S6.</b> <sup>1</sup> H NMR (500 MHz, CDCl <sub>3</sub> ) spectra of compound <b>3c</b> .....   | 38 |
| <b>Figure S7.</b> <sup>13</sup> C NMR (125 MHz, CDCl <sub>3</sub> ) spectra of compound <b>3c</b> .....  | 39 |
| <b>Figure S8.</b> <sup>1</sup> H NMR (500 MHz, CDCl <sub>3</sub> ) spectra of compound <b>3d</b> .....   | 40 |
| <b>Figure S9.</b> <sup>13</sup> C NMR (125 MHz, CDCl <sub>3</sub> ) spectra of compound <b>3d</b> .....  | 41 |
| <b>Figure S10.</b> <sup>1</sup> H NMR (600 MHz, CDCl <sub>3</sub> ) spectra of compound <b>3e</b> .....  | 42 |
| <b>Figure S11.</b> <sup>13</sup> C NMR (150 MHz, CDCl <sub>3</sub> ) spectra of compound <b>3e</b> ..... | 43 |
| <b>Figure S12.</b> <sup>19</sup> F NMR (564 MHz, CDCl <sub>3</sub> ) spectra of compound <b>3e</b> ..... | 44 |
| <b>Figure S13.</b> <sup>1</sup> H NMR (600 MHz, CDCl <sub>3</sub> ) spectra of compound <b>3f</b> .....  | 45 |
| <b>Figure S14.</b> <sup>13</sup> C NMR (150 MHz, CDCl <sub>3</sub> ) spectra of compound <b>3f</b> ..... | 46 |
| <b>Figure S15.</b> <sup>1</sup> H NMR (500 MHz, CDCl <sub>3</sub> ) spectra of compound <b>3g</b> .....  | 47 |
| <b>Figure S16.</b> <sup>13</sup> C NMR (125 MHz, CDCl <sub>3</sub> ) spectra of compound <b>3g</b> ..... | 48 |
| <b>Figure S17.</b> <sup>1</sup> H NMR (500 MHz, CDCl <sub>3</sub> ) spectra of compound <b>3h</b> .....  | 49 |
| <b>Figure S18.</b> <sup>13</sup> C NMR (125 MHz, CDCl <sub>3</sub> ) spectra of compound <b>3h</b> ..... | 50 |
| <b>Figure S19.</b> <sup>1</sup> H NMR (500 MHz, CDCl <sub>3</sub> ) spectra of compound <b>3i</b> .....  | 51 |
| <b>Figure S20.</b> <sup>13</sup> C NMR (125 MHz, CDCl <sub>3</sub> ) spectra of compound <b>3i</b> ..... | 52 |
| <b>Figure S21.</b> <sup>1</sup> H NMR (500 MHz, CDCl <sub>3</sub> ) spectra of compound <b>3j</b> .....  | 53 |

|                                                                                                           |     |
|-----------------------------------------------------------------------------------------------------------|-----|
| <b>Figure S22.</b> $^{13}\text{C}$ NMR (125 MHz, $\text{CDCl}_3$ ) spectra of compound <b>3j</b> .....    | 54  |
| <b>Figure S23.</b> $^1\text{H}$ NMR (500 MHz, $\text{DMSO-}d_6$ ) spectra of compound <b>3k</b> .....     | 55  |
| <b>Figure S24.</b> $^{13}\text{C}$ NMR (125 MHz, $\text{DMSO-}d_6$ ) spectra of compound <b>3k</b> .....  | 56  |
| <b>Figure S25.</b> $^{19}\text{F}$ NMR (470 MHz, $\text{DMSO-}d_6$ ) spectra of compound <b>3k</b> .....  | 57  |
| <b>Figure S26.</b> $^1\text{H}$ NMR (600 MHz, $\text{CDCl}_3$ ) spectra of compound <b>3l</b> .....       | 58  |
| <b>Figure S27.</b> $^{13}\text{C}$ NMR (150 MHz, $\text{CDCl}_3$ ) spectra of compound <b>3l</b> .....    | 59  |
| <b>Figure S28.</b> $^1\text{H}$ NMR (500 MHz, $\text{CDCl}_3$ ) spectra of compound <b>3m</b> .....       | 60  |
| <b>Figure S29.</b> $^{13}\text{C}$ NMR (125 MHz, $\text{CDCl}_3$ ) spectra of compound <b>3m</b> .....    | 61  |
| <b>Figure S30.</b> $^1\text{H}$ NMR (500 MHz, $\text{CDCl}_3$ ) spectra of compound <b>3n</b> .....       | 62  |
| <b>Figure S31.</b> $^{13}\text{C}$ NMR (125 MHz, $\text{CDCl}_3$ ) spectra of compound <b>3n</b> .....    | 63  |
| <b>Figure S32.</b> $^1\text{H}$ NMR (500 MHz, $\text{CDCl}_3$ ) spectra of compound <b>3o</b> .....       | 64  |
| <b>Figure S33.</b> $^{13}\text{C}$ NMR (125 MHz, $\text{CDCl}_3$ ) spectra of compound <b>3o</b> .....    | 65  |
| <b>Figure S34.</b> $^1\text{H}$ NMR (500 MHz, $\text{CDCl}_3$ ) spectra of compound <b>3p</b> .....       | 66  |
| <b>Figure S35.</b> $^{13}\text{C}$ NMR (125 MHz, $\text{CDCl}_3$ ) spectra of compound <b>3p</b> .....    | 67  |
| <b>Figure S36.</b> $^1\text{H}$ NMR (600 MHz, $\text{DMSO-}d_6$ ) spectra of compound <b>3q</b> .....     | 68  |
| <b>Figure S37.</b> $^{13}\text{C}$ NMR (125 MHz, $\text{DMSO-}d_6$ ) spectra of compound <b>3q</b> .....  | 69  |
| <b>Figure S38.</b> $^1\text{H}$ NMR (500 MHz, $\text{CDCl}_3$ ) spectra of compound <b>3r</b> .....       | 70  |
| <b>Figure S39.</b> $^{13}\text{C}$ NMR (125 MHz, $\text{CDCl}_3$ ) spectra of compound <b>3r</b> .....    | 71  |
| <b>Figure S40.</b> $^1\text{H}$ NMR (500 MHz, $\text{CDCl}_3$ ) spectra of compound <b>3s</b> .....       | 72  |
| <b>Figure S41.</b> $^{13}\text{C}$ NMR (125 MHz, $\text{CDCl}_3$ ) spectra of compound <b>3s</b> .....    | 73  |
| <b>Figure S42.</b> $^1\text{H}$ NMR (500 MHz, $\text{CDCl}_3$ ) spectra of compound <b>3t</b> .....       | 74  |
| <b>Figure S44.</b> $^1\text{H}$ NMR (500 MHz, $\text{CDCl}_3$ ) spectra of compound <b>3u</b> .....       | 76  |
| <b>Figure S45.</b> $^{13}\text{C}$ NMR (125 MHz, $\text{CDCl}_3$ ) spectra of compound <b>3u</b> .....    | 77  |
| <b>Figure S46.</b> $^1\text{H}$ NMR (500 MHz, $\text{CDCl}_3$ ) spectra of compound <b>3v</b> .....       | 78  |
| <b>Figure S47.</b> $^{13}\text{C}$ NMR (125 MHz, $\text{CDCl}_3$ ) spectra of compound <b>3v</b> .....    | 79  |
| <b>Figure S48.</b> $^{19}\text{F}$ NMR (470 MHz, $\text{CDCl}_3$ ) spectra of compound <b>3v</b> .....    | 80  |
| <b>Figure S49.</b> $^1\text{H}$ NMR (500 MHz, $\text{CDCl}_3$ ) spectra of compound <b>3w</b> .....       | 81  |
| <b>Figure S50.</b> $^{13}\text{C}$ NMR (125 MHz, $\text{CDCl}_3$ ) spectra of compound <b>3w</b> .....    | 82  |
| <b>Figure S51.</b> $^1\text{H}$ NMR (500 MHz, $\text{CDCl}_3$ ) spectra of compound <b>3x</b> .....       | 83  |
| <b>Figure S52.</b> $^{13}\text{C}$ NMR (125 MHz, $\text{CDCl}_3$ ) spectra of compound <b>3x</b> .....    | 84  |
| <b>Figure S53.</b> $^1\text{H}$ NMR (500 MHz, $\text{CDCl}_3$ ) spectra of compound <b>3y</b> .....       | 85  |
| <b>Figure S54.</b> $^{13}\text{C}$ NMR (125 MHz, $\text{CDCl}_3$ ) spectra of compound <b>3y</b> .....    | 86  |
| <b>Figure S55.</b> $^1\text{H}$ NMR (500 MHz, $\text{CDCl}_3$ ) spectra of compound <b>3z</b> .....       | 87  |
| <b>Figure S56.</b> $^{13}\text{C}$ NMR (125 MHz, $\text{CDCl}_3$ ) spectra of compound <b>3z</b> .....    | 88  |
| <b>Figure S57.</b> $^1\text{H}$ NMR (500 MHz, $\text{CDCl}_3$ ) spectra of compound <b>3a'</b> .....      | 89  |
| <b>Figure S58.</b> $^{13}\text{C}$ NMR (125 MHz, $\text{CDCl}_3$ ) spectra of compound <b>3a'</b> .....   | 90  |
| <b>Figure S59.</b> $^1\text{H}$ NMR (500 MHz, $\text{CDCl}_3$ ) spectra of compound <b>3b'</b> .....      | 91  |
| <b>Figure S60.</b> $^{13}\text{C}$ NMR (125 MHz, $\text{CDCl}_3$ ) spectra of compound <b>3b'</b> .....   | 92  |
| <b>Figure S61.</b> $^{19}\text{F}$ NMR (470 MHz, $\text{CDCl}_3$ ) spectra of compound <b>3b'</b> .....   | 93  |
| <b>Figure S62.</b> $^1\text{H}$ NMR (600 MHz, $\text{DMSO-}d_6$ ) spectra of compound <b>3c'</b> .....    | 94  |
| <b>Figure S63.</b> $^{13}\text{C}$ NMR (150 MHz, $\text{DMSO-}d_6$ ) spectra of compound <b>3c'</b> ..... | 95  |
| <b>Figure S64.</b> $^1\text{H}$ NMR (500 MHz, $\text{DMSO-}d_6$ ) spectra of compound <b>3d'</b> .....    | 96  |
| <b>Figure S65.</b> $^{13}\text{C}$ NMR (125 MHz, $\text{DMSO-}d_6$ ) spectra of compound <b>3d'</b> ..... | 97  |
| <b>Figure S66.</b> $^1\text{H}$ NMR (500 MHz, $\text{DMSO-}d_6$ ) spectra of compound <b>3e'</b> .....    | 98  |
| <b>Figure S67.</b> $^{13}\text{C}$ NMR (125 MHz, $\text{DMSO-}d_6$ ) spectra of compound <b>3e'</b> ..... | 99  |
| <b>Figure S68.</b> $^1\text{H}$ NMR (500 MHz, $\text{DMSO-}d_6$ ) spectra of compound <b>3f'</b> .....    | 100 |
| <b>Figure S69.</b> $^{13}\text{C}$ NMR (125 MHz, $\text{DMSO-}d_6$ ) spectra of compound <b>3f'</b> ..... | 101 |
| <b>Figure S70.</b> $^1\text{H}$ NMR (600 MHz, $\text{DMSO-}d_6$ ) spectra of compound <b>3g'</b> .....    | 102 |
| <b>Figure S71.</b> $^{13}\text{C}$ NMR (125 MHz, $\text{DMSO-}d_6$ ) spectra of compound <b>3g'</b> ..... | 103 |
| <b>Figure S72.</b> $^1\text{H}$ NMR (600 MHz, $\text{DMSO-}d_6$ ) spectra of compound <b>3h'</b> .....    | 104 |
| <b>Figure S73.</b> $^{13}\text{C}$ NMR (150 MHz, $\text{DMSO-}d_6$ ) spectra of compound <b>3h'</b> ..... | 105 |

|                                                                                                                     |     |
|---------------------------------------------------------------------------------------------------------------------|-----|
| <b>Figure S74.</b> <sup>19</sup> F NMR (564 MHz, DMSO- <i>d</i> <sub>6</sub> ) spectra of compound <b>3h'</b> ..... | 106 |
| <b>Figure S75.</b> <sup>1</sup> H NMR (600 MHz, DMSO- <i>d</i> <sub>6</sub> ) spectra of compound <b>3i'</b> .....  | 107 |
| <b>Figure S76.</b> <sup>13</sup> C NMR (150 MHz, DMSO- <i>d</i> <sub>6</sub> ) spectra of compound <b>3i'</b> ..... | 108 |
| <b>Figure S77.</b> <sup>1</sup> H NMR (500 MHz, DMSO- <i>d</i> <sub>6</sub> ) spectra of compound <b>3j'</b> .....  | 109 |
| <b>Figure S78.</b> <sup>13</sup> C NMR (125 MHz, DMSO- <i>d</i> <sub>6</sub> ) spectra of compound <b>3j'</b> ..... | 110 |
| <b>Figure S79.</b> <sup>1</sup> H NMR (600 MHz, DMSO- <i>d</i> <sub>6</sub> ) spectra of compound <b>3k'</b> .....  | 111 |
| <b>Figure S80.</b> <sup>13</sup> C NMR (150 MHz, DMSO- <i>d</i> <sub>6</sub> ) spectra of compound <b>3k'</b> ..... | 112 |
| <b>Figure S81.</b> HPLC of the reaction mixture.....                                                                | 113 |
| <b>Figure S82.</b> HRMS of substrate <b>1h</b> .....                                                                | 114 |
| <b>Figure S83.</b> HRMS of substrate <b>2b</b> .....                                                                | 115 |
| <b>Figure S84.</b> HRMS of intermediate <b>4n/5n</b> .....                                                          | 116 |
| <b>Figure S85.</b> HRMS of intermediate <b>4n/5n</b> .....                                                          | 117 |
| <b>Figure S86.</b> HRMS of intermediate <b>6n</b> .....                                                             | 118 |
| <b>Figure S87.</b> HRMS of intermediate <b>7n</b> .....                                                             | 119 |
| <b>Figure S88.</b> HRMS of intermediate <b>8n</b> .....                                                             | 120 |
| <b>Figure S89.</b> HRMS of the target compound <b>3n</b> .....                                                      | 121 |
| <b>References</b> .....                                                                                             | 122 |

## General Information

All compounds were fully characterised by spectroscopic data. The NMR spectra were recorded on a Bruker DRX600 or Bruker DRX500. Chemical shifts ( $\delta$ ) are expressed in ppm,  $J$  values are given in Hz, and deuterated  $\text{CDCl}_3$  or  $\text{DMSO-}d_6$  were used as solvent. IR spectra were recorded on a FT-IR Thermo Nicolet Avatar 360 using a KBr pellet. The reactions were monitored by thin layer chromatography (TLC) using silica gel GF<sub>254</sub>. The melting points were determined on a XT-4A melting point apparatus and are uncorrected. HRMs were performed on an Agilent LC/Msd TOF instrument.

The nitro-enamines **1** were synthesized by known literature procedures.<sup>1</sup> Other materials were purchased from Adamas-beta Corporation Limited. All chemicals and solvents were used as received without further purification unless otherwise stated. Two kinds of reagents which were used in the experiment were commercially available reagents.

### General Procedure for the Preparation of **3**

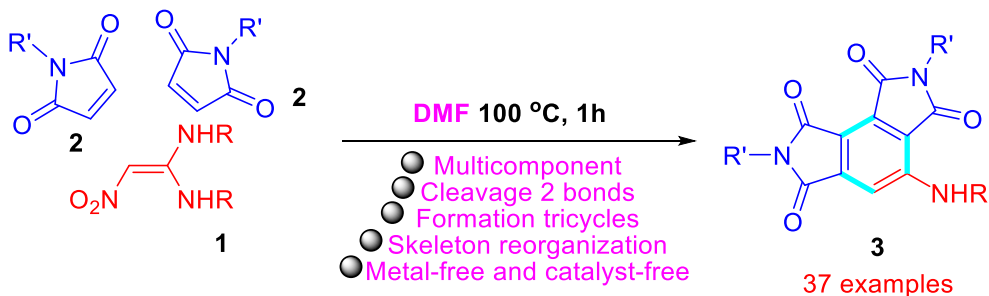

A round-bottom flask was charged with 1,1-enediamine **1** (1 mmol, 1.0 equiv.) and maleimide **2** (2.4 mmol, 2.4 equiv.). Then, the flask was supplemented with DMF (6 mL), and the mixture was stirred on an oil bath at 100 °C for approximately 1 h while the reaction was monitored by TLC until the substrate was completely consumed. After the reaction was cooled to room temperature, the mixture was extracted with ethyl acetate (6 × 15 mL). The organic layer was washed with water and brine, and the combined organic phases were dried over  $\text{MgSO}_4$ , filtered, and concentrated under reduced pressure to afford the crude product. Finally, the product **3** was purified from the crude mixture by flash column chromatography over silica gel using a mixture of petroleum ether/ethyl acetate (20:1–10:1, v/v) as the eluent.

## The gram-scale experiment

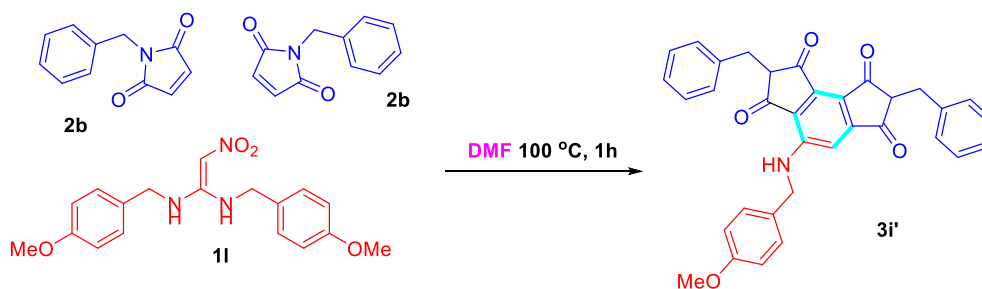

A 25 mL round-bottom flask was charged with *N,N'*-bis(4-methoxybenzyl)-2-nitroethene-1,1-diamine (**1a**) (4 mmol, 1.0 equiv.) and *N*-benzylmaleimide (**2a**) (9.6 mmol, 2.4 equiv.). The flask was then charged with 8 mL of DMF, and the mixture was stirred on an oil bath at 100 °C for 1 hour, monitoring the reaction progress via thin-layer chromatography (TLC) until complete substrate consumption was observed. After cooling the reaction mixture to room temperature, it was extracted with ethyl acetate (6 × 20 mL). The organic phase was washed with water and brine, after which the combined organic layers were dried over anhydrous sodium sulfate (Na<sub>2</sub>SO<sub>4</sub>), filtered, and concentrated under reduced pressure to obtain the crude product. The final product, **3i'**, was purified from the crude mixture using flash column chromatography over silica gel, employing a petroleum ether/ethyl acetate mixture (20:1 to 10:1, v/v) as the eluent. The resulting purified product weighed 998 mg, corresponding to a calculated yield of 47%.

## Spectroscopic Data of 3a-3k'

### 2,7-Dibenzyl-4-(butylamino)pyrrolo[3,4-*e*]isoindole-1,3,6,8(2*H*,7*H*)-tetraone(3a)

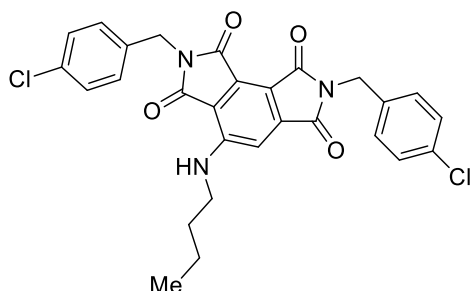

Yellow solid (58%); Mp: 210.4–215.1 °C; IR (KBr): 3495, 3446, 2989, 1745, 1726, 1620, 1510,  $\text{cm}^{-1}$ ;  $^1\text{H}$  NMR (500 MHz,  $\text{CDCl}_3$ ):  $\delta$  = 7.39–7.35 (m, 4H, ArH), 7.20 (m, 5H, ArH), 7.14 (t, 1H,  $J$  = 6.2 Hz, NH), 4.79 (s, 2H,  $\text{CH}_2$ ), 4.75 (s, 2H,  $\text{CH}_2$ ), 3.37–3.33 (m, 2H,  $\text{CH}_2$ ), 1.71–1.65 (m, 2H,  $\text{CH}_2$ ), 1.49–1.43 (m, 2H,  $\text{CH}_2$ ), 0.98 (t, 3H,  $J$  = 5.6 Hz,  $\text{CH}_3$ );  $^{13}\text{C}$  NMR (125 MHz,  $\text{CDCl}_3$ ):  $\delta$  = 169.4, 166.7, 164.2, 164.0, 150.3, 140.1, 134.6, 134.4, 134.0, 133.9, 130.4, 130.4, 130.3, 130.4, 130.3, 128.9, 128.9, 128.8, 128.8, 113.5, 113.3, 110.1, 42.9, 41.2, 41.0, 31.0, 20.0, 13.7. HRMS KM [BBB(TOF ES<sup>+</sup>)  $m/z$ :  $[\text{M}+\text{Na}]^+$  calcd for  $\text{C}_{28}\text{H}_{23}\text{N}_3\text{O}_4\text{Cl}_2$  558.0958; found, 558.0964.

### 2,7-Bis(4-chlorobenzyl)-4-((4-methylbenzyl)amino)pyrrolo[3,4-*e*]isoindole-1,3,6,8(2*H*,7*H*)-tetraone (3b)

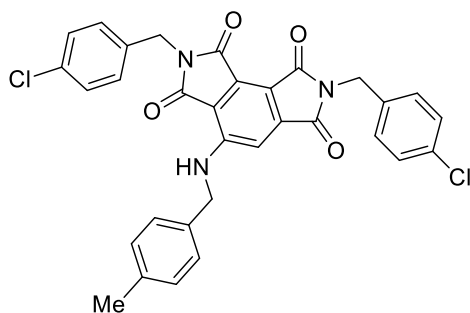

Yellow solid (52%); Mp: 206.1–207.6 °C; IR (KBr): 3475, 3440, 2982, 1745, 1715, 1662, 1515, 806  $\text{cm}^{-1}$ ;  $^1\text{H}$  NMR (500 MHz,  $\text{CDCl}_3$ ):  $\delta$  = 7.54 (t,  $J$  = 5.9 Hz, 1H, NH), 7.38–7.35 (m, 6H, ArH), 7.32–7.30 (m, 3H, ArH), 7.27–7.23 (m, 5H, ArH), 4.76 (s, 2H,  $\text{CH}_2$ ), 4.76 (s, 2H,  $\text{CH}_2$ ), 4.57 (d,  $J$  = 5.9 Hz, 2H,  $\text{CH}_2$ ).  $^{13}\text{C}$  NMR (125 MHz,  $\text{CDCl}_3$ ):  $\delta$  = 169.3, 166.5, 164.1, 163.9, 150.1, 140.1, 136.0, 134.5, 134.3, 134.1, 134.0, 130.4, 130.4, 130.4, 130.4, 130.2, 129.2, 129.2, 128.9, 128.9, 128.8, 128.8, 128.3, 127.1, 127.1, 114.2, 114.1, 110.5, 47.1, 41.3, 41.1. HRMS (TOF ES<sup>+</sup>)  $m/z$ :  $[\text{M}+\text{Na}]^+$  calcd for  $\text{C}_{32}\text{H}_{23}\text{Cl}_2\text{N}_3\text{O}_4$  606.0958; found, 606.0965.

### 4-(Benzylamino)-2,7-bis(4-chlorobenzyl)pyrrolo[3,4-*e*]isoindole-1,3,6,8(2*H*,7*H*)-

### tetraone (3c)

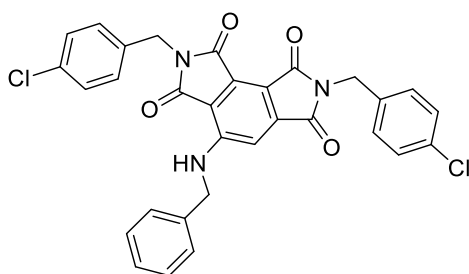

Yellow solid (46%); Mp: 165.3–166.5 °C; IR (KBr): 3477, 3418, 2998, 1743, 1636, 1571, 1374, 831  $\text{cm}^{-1}$ ;  $^1\text{H}$  NMR (500 MHz,  $\text{CDCl}_3$ ):  $\delta$  = 7.54 (t,  $J$  = 5.9 Hz, 1H, NH), 7.38–7.35 (m, 6H, ArH), 7.32–7.30 (m, 3H, ArH), 7.27–7.23 (m, 5H, ArH), 4.76 (s, 2H,  $\text{CH}_2$ ), 4.76 (s, 2H,  $\text{CH}_2$ ), 4.57 (d,  $J$  = 5.9 Hz, 2H,  $\text{CH}_2$ ).  $^{13}\text{C}$  NMR (125 MHz,  $\text{CDCl}_3$ ):  $\delta$  = 169.3, 166.5, 164.1, 163.9, 150.1, 140.1, 136.0, 134.5, 134.3, 134.1, 134.0, 130.4, 130.4, 130.4, 130.2, 129.2, 129.2, 128.9, 128.9, 128.8, 128.8, 128.3, 127.1, 127.1, 114.2, 114.1, 110.5, 47.1, 41.3, 41.1. HRMS (TOF  $\text{ES}^+$ )  $m/z$ :  $[\text{M}+\text{Na}]^+$  calcd for  $\text{C}_{31}\text{H}_{21}\text{Cl}_2\text{N}_3\text{O}_4$  592.0801; found, 592.0810.

### 2,7-Bis(4-chlorobenzyl)-4-((4-chlorobenzyl)amino)pyrrolo[3,4-*e*]isoindole-1,3,6,8(2*H*,7*H*)-tetraone (3d)

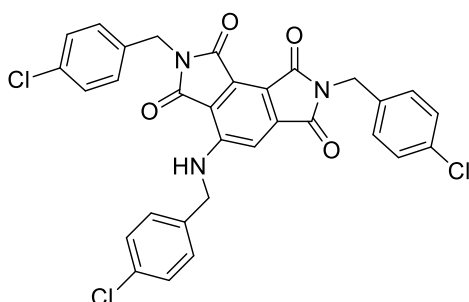

Yellow solid (44%); Mp: 135.1–136.7 °C; IR (KBr): 3484, 3365, 2944, 1712, 1634, 1525, 1494, 820  $\text{cm}^{-1}$ ;  $^1\text{H}$  NMR (500 MHz,  $\text{CDCl}_3$ ):  $\delta$  = 7.53 (t,  $J$  = 5.8 Hz, 1H, NH), 7.37–7.33 (m, 6H, NH), 7.28–7.24 (m, 6H, ArH), 7.19 (s, 1H, ArH), 4.77 (s, 2H,  $\text{CH}_2$ ), 4.76 (s, 2H,  $\text{CH}_2$ ), 2.55 (t,  $J$  = 5.8 Hz, 2H,  $\text{CH}_2$ ).  $^{13}\text{C}$  NMR (125 MHz,  $\text{CDCl}_3$ ):  $\delta$  = 166.4, 163.9, 149.9, 140.1, 134.5, 134.4, 134.2, 134.1, 134.1, 134.0, 130.4, 130.4, 130.4, 129.4, 129.4, 128.9, 128.9, 128.9, 128.9, 128.9, 128.9, 128.9, 128.4, 128.4, 128.4, 114.4, 114.4, 110.3, 46.4, 41.3, 41.1. HRMS (TOF  $\text{ES}^+$ )  $m/z$ :  $[\text{M}+\text{Na}]^+$  calcd for  $\text{C}_{31}\text{H}_{20}\text{Cl}_3\text{N}_3\text{O}_4$  626.0412; found, 626.0421.

### 2,7-Bis(4-chlorobenzyl)-4-((4-fluorobenzyl)amino)pyrrolo[3,4-*e*]isoindole-1,3,6,8(2*H*,7*H*)-tetraone (3e)

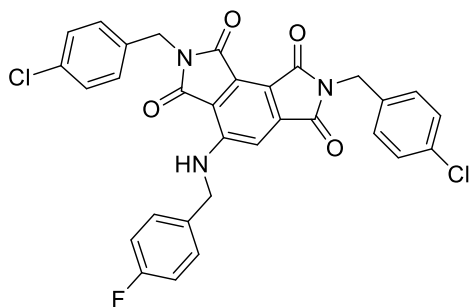

Yellow solid (43%); Mp: 184.9–187.8 °C; IR (KBr): 3541, 3430, 2983, 1742, 1714, 1643, 1624, 832  $\text{cm}^{-1}$ ;  $^1\text{H}$  NMR (600 MHz,  $\text{CDCl}_3$ ):  $\delta$  = 7.50 (t,  $J$  = 4.2 Hz, 1H, NH), 7.37 (s, 2H, ArH), 7.6 (s, 2H, ArH), 7.30–7.21 (m, 7H, ArH), 7.08–7.04 (m, 2H, ArH), 4.77 (s, 2H,  $\text{CH}_2$ ), 4.76 (s, 2H,  $\text{CH}_2$ ), 4.55 (d,  $J$  = 5.82 Hz, 2H,  $\text{CH}_2$ );  $^{13}\text{C}$  NMR (150 MHz,  $\text{CDCl}_3$ ):  $\delta$  = 169.3, 166.4, 164.1, 163.9, 162.5, 149.9, 140.2, 134.4, 134.3, 134.1, 134.0, 131.7, 131.7, 130.4, 130.4, 130.4, 130.2, 128.9, 128.9, 128.9, 128.9, 128.8, 128.8, 116.3, 116.1, 114.3, 114.3, 110.3, 46.4, 41.3, 41.1.  $^{19}\text{F}$  NMR (564 MHz,  $\text{DMSO}-d_6$ ):  $\delta$  = -113.5 ppm. HRMS (TOF  $\text{ES}^+$ )  $m/z$ :  $[\text{M}+\text{H}]^+$  calcd for  $\text{C}_{31}\text{H}_{21}\text{Cl}_3\text{N}_3\text{O}_4$  588.0888; found, 588.0885.

**2,7-Bis(4-chlorobenzyl)-4-((4-methoxyphenethyl)amino)pyrrolo[3,4-*e*]isoindole-1,3,6,8(2*H*,7*H*)-tetraone (3f)**

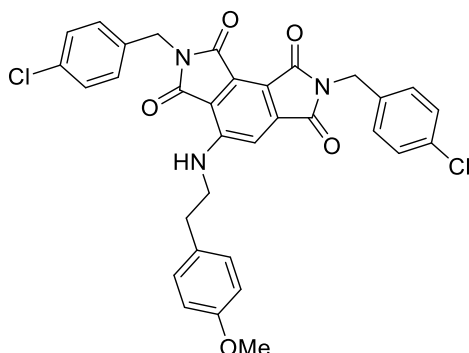

Yellow solid (58%); Mp: 176.1–179.7 °C; IR (KBr): 3476, 3397, 2926, 1745, 1709, 1636, 1518, 831  $\text{cm}^{-1}$ ;  $^1\text{H}$  NMR (600 MHz,  $\text{CDCl}_3$ ):  $\delta$  = 7.38–7.34 (m, 4H, ArH), 7.27–7.24 (m, 4H, ArH), 7.18 (s, 2H, ArH), 7.14 (s, 1H, NH), 7.13 (s, 1H, ArH), 6.85 (d, 2H,  $J$  = 8.4 Hz, ArH), 4.77 (s, 2H,  $\text{CH}_2$ ), 4.73 (s, 2H,  $\text{CH}_2$ ), 3.77 (s, 3H,  $\text{CH}_3$ ), 3.57 (d, 2H,  $J$  = 6.18 Hz  $\text{CH}_2$ ), 2.92 (t, 2H,  $J$  = 6.96 Hz  $\text{CH}_2$ ).  $^{13}\text{C}$  NMR (150 MHz,  $\text{CDCl}_3$ ):  $\delta$  = 169.2, 166.6, 164.2, 163.9, 158.7, 150.1, 140.0, 134.5, 134.4, 134.0, 133.9, 130.4, 130.4, 130.3, 130.3, 130.2, 130.2, 129.7, 129.7, 129.4, 128.9, 128.9, 128.8, 128.8, 114.4, 113.7, 113.5, 110.1, 55.3, 44.7, 41.2, 41.0, 34.5. HRMS (TOF  $\text{ES}^+$ )  $m/z$ :  $[\text{M}+\text{H}]^+$  calcd for  $\text{C}_{33}\text{H}_{25}\text{Cl}_2\text{N}_3\text{O}_5$  614.1244; found, 614.1249.

**2,7-Bis(4-chlorobenzyl)-4-((4-methylphenethyl)amino)pyrrolo[3,4-*e*]isoindole-1,3,**



### 6,8(2*H*,7*H*)-tetraone (3g)

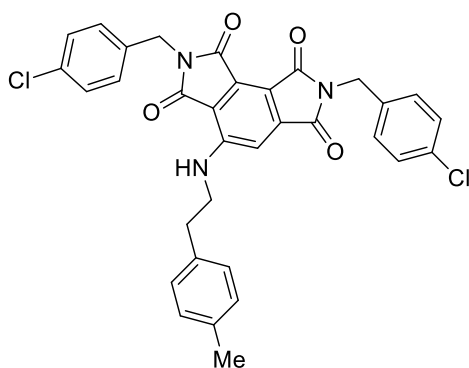

Yellow solid (52%); Mp: 128.3–134.5 °C; IR (KBr): 3477, 3418, 2998, 1743, 1636, 1571, 1374, 831  $\text{cm}^{-1}$ ;  $^1\text{H}$  NMR (500 MHz,  $\text{CDCl}_3$ ):  $\delta$  = 7.38 (s, 1H, NH), 7.36 (t,  $J$  = 5.6 Hz, 3H, ArH), 7.26 (t,  $J$  = 6.7 Hz, 4H, ArH), 7.19 (s, 2H, ArH), 7.12 (t,  $J$  = 8.3 Hz, 4H, ArH), 4.78 (s, 2H,  $\text{CH}_2$ ), 4.74 (s, 2H,  $\text{CH}_2$ ), 3.61–3.57 (m, 2H,  $\text{CH}_2$ ), 2.94 (t,  $J$  = 7.0 Hz, 2H,  $\text{CH}_2$ ), 2.32 (d,  $J$  = 8.4 Hz, 3H,  $\text{CH}_3$ ),.  $^{13}\text{C}$  NMR (125 MHz,  $\text{CDCl}_3$ ):  $\delta$  = 169.2, 166.6, 164.2, 164.0, 150.1, 140.0, 136.7, 134.5, 134.4, 134.0, 133.9, 130.4, 130.4, 130.3, 130.3, 130.2, 130.2, 129.6, 129.6, 128.9, 128.9, 128.8, 128.8, 128.6, 128.6, 113.7, 113.6, 110.6, 44.6, 41.2, 41.0, 35.0, 21.0. HRMS (TOF  $\text{ES}^+$ )  $m/z$ :  $[\text{M}+\text{H}]^+$  calcd for  $\text{C}_{33}\text{H}_{25}\text{Cl}_2\text{N}_3\text{O}_4$  598.1295; found, 598.1298.

### 2,7-Bis(4-chlorobenzyl)-4-(phenethylamino)pyrrolo[3,4-*e*]isoindole-1,3,6,8(2*H*,7*H*)-tetraone (3h)

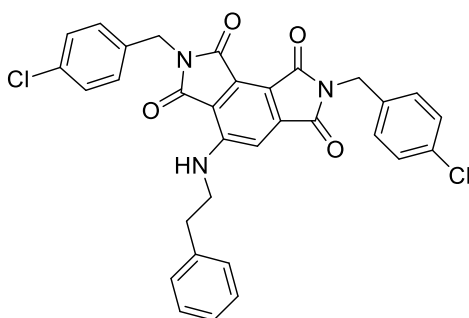

Yellow solid (44%); Mp: 116.1–119.7 °C; IR (KBr): 3496, 3372, 2944, 1712, 1634, 1525, 1494  $\text{cm}^{-1}$ ;  $^1\text{H}$  NMR (500 MHz,  $\text{CDCl}_3$ ):  $\delta$  = 7.38 (s, 1H, NH), 7.36–7.32 (m, 5H, NH), 7.27–7.24 (m, 7H, ArH), 4.78 (s, 2H,  $\text{CH}_2$ ), 4.73 (s, 2H,  $\text{CH}_2$ ), 3.64–3.60 (m, 2H,  $\text{CH}_2$ ), 2.98 (t,  $J$  = 9.0 Hz, 2H,  $\text{CH}_2$ ).  $^{13}\text{C}$  NMR (125 MHz,  $\text{CDCl}_3$ ):  $\delta$  = 169.2, 166.6, 164.2, 164.0, 150.1, 140.1, 137.5, 134.5, 134.4, 134.0, 133.9, 130.4, 130.4, 130.3, 130.3, 129.0, 120.9, 128.9, 128.9, 128.8, 128.8, 128.7, 128.7, 127.1, 113.8, 113.6, 110.0, 44.5, 41.3, 41.0, 35.4. HRMS (TOF  $\text{ES}^+$ )  $m/z$ :  $[\text{M}+\text{Na}]^+$  calcd for  $\text{C}_{32}\text{H}_{23}\text{Cl}_2\text{N}_3\text{O}_4$  606.0958; found, 606.0966.

### 2,7-Bis(4-chlorobenzyl)-4-((4-chlorophenethyl)amino)pyrrolo[3,4-*e*]isoindole-1,3,

**6,8(2*H*,7*H*)-tetraone (3i)**

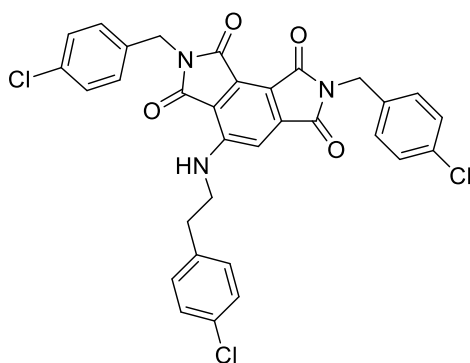

Yellow solid (41%); Mp: 184.9–187.8 °C; IR (KBr): 3541, 3410, 2993, 1742, 1704, 1636, 1624, 832 cm<sup>-1</sup>; <sup>1</sup>H NMR (500 MHz, CDCl<sub>3</sub>): δ = 7.38 (s, 1H, NH), 7.36 (t, *J* = 5.8 Hz, 3H, ArH), 7.30–7.25 (m, 7H, ArH), 7.16 (d, *J* = 8.1 Hz, 3H, ArH), 4.78 (s, 2H, CH<sub>2</sub>), 4.74 (s, 2H, CH<sub>2</sub>), 3.62–3.58 (m, 2H, CH<sub>2</sub>), 2.96 (t, *J* = 6.9 Hz, 2H, CH<sub>2</sub>); <sup>13</sup>C NMR (125 MHz, CDCl<sub>3</sub>): δ = 169.2, 166.5, 164.1, 163.9, 150.1, 140.1, 135.9, 134.5, 134.3, 134.0, 133.9, 133.0, 130.4, 130.4, 130.4, 130.4, 130.2, 130.1, 130.1, 129.1, 129.1, 128.9, 128.9, 128.8, 128.8, 113.9, 113.8, 109.9, 44.2, 41.3, 41.0, 34.7. HRMS (TOF ES<sup>+</sup>) *m/z*: [M+H]<sup>+</sup> calcd for C<sub>32</sub>H<sub>22</sub>Cl<sub>3</sub>N<sub>3</sub>O<sub>4</sub> 618.0749; found, 618.0754.

**2,7-dibenzyl-4-((3-methylphenethyl)amino)pyrrolo[3,4-*e*]isoindole-1,3,6,8(2*H*, 7*H*)-tetraone (3j)**

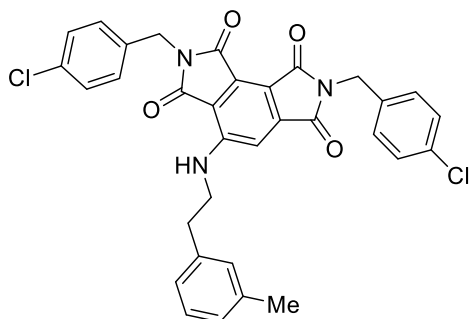

Yellow solid (53%); Mp: 206.1–207.6 °C; IR (KBr): 3482, 3437, 2989, 1745, 1713, 1663, 1518, 983, 806, 751 cm<sup>-1</sup>; <sup>1</sup>H NMR (500 MHz, CDCl<sub>3</sub>): δ = 7.38 (s, 1H, NH), 7.36 (t, *J* = 5.9 Hz, 3H, ArH), 7.26 (m, 4H, ArH), 7.18 (s, 2H, ArH), 7.11 (d, *J* = 8.2 Hz, 4H, ArH), 4.77 (s, 2H, CH<sub>2</sub>), 4.73 (s, 2H, CH<sub>2</sub>), 3.60–3.56 (m, 2H, CH<sub>2</sub>), 2.94 (t, *J* = 7.0 Hz, 2H, CH<sub>2</sub>), 2.31 (s, 3H, CH<sub>3</sub>). <sup>13</sup>C NMR (125 MHz, CDCl<sub>3</sub>): δ = 169.2, 166.6, 164.2, 164.0, 150.1, 140.0, 136.7, 134.5, 134.4, 134.0, 133.9, 130.4, 130.4, 130.3, 130.3, 130.2, 130.2, 129.6, 129.6, 128.9, 128.9, 128.8, 128.8, 128.6, 128.6, 113.7, 113.5, 110.1, 44.6, 41.2, 41.0, 35.0, 21.0. HRMS (TOF ES<sup>+</sup>) *m/z*: [M+H]<sup>+</sup> calcd for C<sub>33</sub>H<sub>25</sub>Cl<sub>2</sub>N<sub>3</sub>O<sub>4</sub> 598.1295; found, 598.1298.

**2,7-Bis(4-chlorobenzyl)-4-((4-fluorophenethyl)amino)pyrrolo[3,4-*e*]isoindole-1,3,6,8(2*H*,7*H*)-tetraone (3k)**

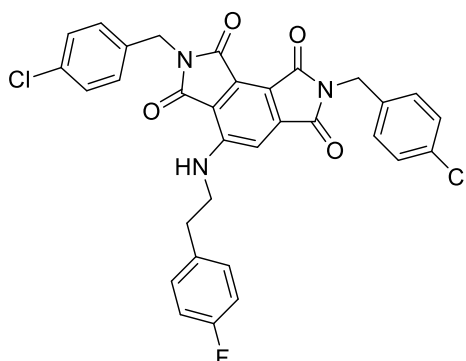

Yellow solid (40%); Mp: 215.1–216.2 °C; IR (KBr): 3467, 3376, 2987, 1748, 1712, 1632, 1525, 848, 790, 741  $\text{cm}^{-1}$ ;  $^1\text{H}$  NMR (500 MHz,  $\text{DMSO-}d_6$ ):  $\delta$  = 7.54 (t,  $J$  = 6.1 Hz, 1H, ArH), 7.50 (s, 1H, NH), 7.39 (d,  $J$  = 8.4 Hz, 4H, ArH), 7.35–7.30 (m, 5H, ArH), 7.19 (d,  $J$  = 10.1 Hz, 1H, ArH), 7.13 (d,  $J$  = 7.6 Hz, 1H, ArH), 7.03 (t,  $J$  = 5.4 Hz, 1H, ArH), 4.74 (s, 2H,  $\text{CH}_2$ ), 4.71 (s, 2H,  $\text{CH}_2$ ), 3.77–3.73 (m, 2H,  $\text{CH}_2$ ), 2.94 (t,  $J$  = 7.1 Hz, 2H,  $\text{CH}_2$ );  $^{13}\text{C}$  NMR (125 MHz,  $\text{DMSO-}d_6$ ):  $\delta$  = 169.2, 166.9, 164.4, 164.1, 162.7 (d,  $J_1$  = 241.3 Hz), 150.2, 142.1, 142.0, 139.9, 136.1, 135.9, 132.6, 130.7, 130.7, 130.6, 129.9, 129.9, 129.9, 129.9, 129.0, 129.0, 125.5, 116.0 (d,  $J_2$  = 21.3 Hz), 113.7, 113.5, 113.5, 113.0, 111.3, 43.6, 40.8, 40.6, 34.7.  $^{19}\text{F}$  NMR (470 MHz,  $\text{DMSO-}d_6$ ):  $\delta$  = –113.5 ppm. HRMS (TOF  $\text{ES}^+$ )  $m/z$ :  $[\text{M}+\text{Na}]^+$  calcd for  $\text{C}_{32}\text{H}_{22}\text{Cl}_2\text{N}_3\text{O}_4$  624.0864; found, 624.0867.

**2,7-Dibenzyl-4-((4-methoxyphenethyl)amino)pyrrolo[3,4-*e*]isoindole-1,3,6,8(2*H*,7*H*)-tetraone (3l)**

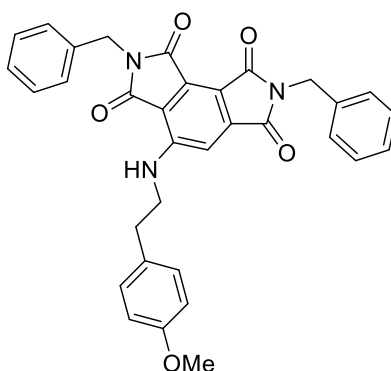

Yellow solid (55%); Mp: 186.8–188.2 °C; IR (KBr): 3468, 3454, 2941, 1746, 1711, 1634, 1517, 830  $\text{cm}^{-1}$ ;  $^1\text{H}$  NMR (600 MHz,  $\text{CDCl}_3$ ):  $\delta$  = 7.44–7.41 (m, 4H, ArH), 7.31–7.24 (m, 4H, ArH), 7.19 (d,  $J$  = 6.7 Hz, 2H, ArH), 7.15 (s, 1H, ArH), 7.13 (s, 1H, NH), 6.86 (s, 1H, ArH), 6.85 (s, 1H, ArH), 4.82 (s, 2H,  $\text{CH}_2$ ), 4.78 (s, 2H,  $\text{CH}_2$ ), 3.77 (s, 3H,  $\text{CH}_3$ ), 3.58–3.55 (m, 2H,  $\text{CH}_2$ ), 2.91 (t,  $J$  = 7.0 Hz, 2H,  $\text{CH}_2$ );  $^{13}\text{C}$  NMR (150 MHz,  $\text{CDCl}_3$ ):  $\delta$  = 169.4, 166.7, 164.3, 164.1, 158.7, 150.0, 140.1, 136.1, 136.0, 130.3, 129.7, 129.7, 129.5, 128.9, 128.9, 128.8, 128.8, 128.7, 128.7, 128.7, 128.7, 128.0, 127.9, 114.4,

114.4, 113.8, 113.7, 110.0, 55.3, 44.7, 41.9, 41.7, 34.6; HRMS (TOF ES<sup>+</sup>) m/z: [M+H]<sup>+</sup> calcd for C<sub>33</sub>H<sub>28</sub>N<sub>3</sub>O<sub>5</sub> 546.2023; found, 546.2023.

**2,7-Dibenzyl-4-((4-methylphenethyl)amino)pyrrolo[3,4-*e*]isoindole-1,3,6,8(2*H*, 7*H*)-tetraone (3m)**

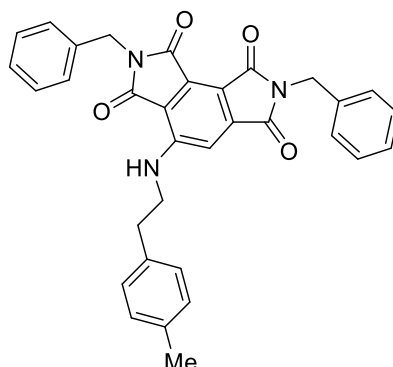

Yellow solid (49%); Mp: 203.3–206.1 °C; IR (KBr): 3500, 3468, 2991, 1745, 1718, 1634, 1519, 846 cm<sup>-1</sup>; <sup>1</sup>H NMR (500 MHz, CDCl<sub>3</sub>): δ = 7.42 (t, *J* = 9.2 Hz, 4H, ArH), 7.30–7.18 (m, 11H, ArH), 7.11 (s, 1H, NH), 4.81 (s, 2H, CH<sub>2</sub>), 4.77 (s, 2H, CH<sub>2</sub>), 3.59–3.55 (m, 2H, CH<sub>2</sub>), 2.92 (t, *J* = 7.0 Hz, 2H, CH<sub>2</sub>), 2.30 (s, 3H, CH<sub>3</sub>); <sup>13</sup>C NMR (125 MHz, CDCl<sub>3</sub>): δ = 169.4, 166.7, 164.3, 164.1, 150.0, 140.1, 136.6, 136.2, 136.0, 134.5, 130.3, 129.6, 129.6, 128.9, 128.9, 128.8, 128.8, 128.7, 128.7, 128.6, 128.6, 128.6, 128.6, 128.0, 127.9, 113.9, 113.7, 109.9, 44.6, 41.9, 41.7, 35.0, 21.0. HRMS (TOF ES<sup>+</sup>) m/z: [M+Na]<sup>+</sup> calcd for C<sub>33</sub>H<sub>27</sub>N<sub>3</sub>O<sub>4</sub> 552.1894; found, 552.1902.

**2,7-Dibenzyl-4-(phenethylamino)pyrrolo[3,4-*e*]isoindole-1,3,6,8(2*H*,7*H*)-tetraone (3n)**

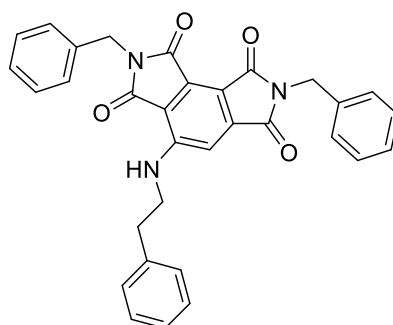

Yellow solid (45%); Mp: 199.3–202.5 °C; IR (KBr): 3348, 3376, 2927, 1753, 1712, 1635, 1525 cm<sup>-1</sup>; <sup>1</sup>H NMR (500 MHz, CDCl<sub>3</sub>): δ = 7.43–7.40 (m, 4H, ArH), 7.33–7.21 (m, 12H, ArH), 7.20 (s, 1H, NH), 4.82 (s, 2H, CH<sub>2</sub>), 4.77 (s, 2H, CH<sub>2</sub>), 3.62–3.58 (m, 2H, CH<sub>2</sub>), 2.97 (t, *J* = 7.1 Hz, 2H, CH<sub>3</sub>); <sup>13</sup>C NMR (125 MHz, CDCl<sub>3</sub>): δ = 169.4, 166.7, 164.3, 164.0, 150.0, 140.2, 137.6, 136.1, 136.0, 130.3, 128.9, 128.9, 128.9, 128.8, 128.8, 128.7, 128.7, 128.7, 128.7, 128.0, 128.0, 127.9, 127.9, 127.1, 127.1, 114.0, 113.8, 109.9,

44.5, 41.9, 41.7, 35.4. HRMS (TOF ES<sup>+</sup>) m/z: [M+H]<sup>+</sup> calcd for C<sub>32</sub>H<sub>25</sub>N<sub>3</sub>O<sub>4</sub> 516.1918; found, 516.1909.

**2,7-Dibenzyl-4-((4-chlorophenethyl)amino)pyrrolo[3,4-*e*]isoindole-1,3,6,8(2*H*, 7*H*)-tetraone (3o)**

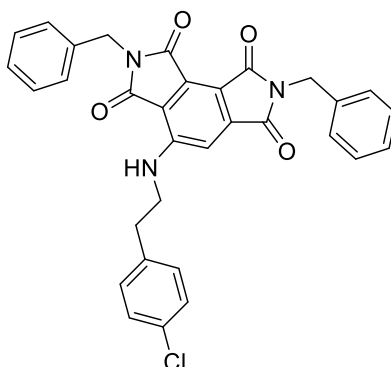

Yellow solid (42%); Mp: 208.3–212.8 °C; IR (KBr): 3460, 3372, 2940, 1754, 1709, 1634, 1524, 819 cm<sup>-1</sup>; <sup>1</sup>H NMR (500 MHz, CDCl<sub>3</sub>): δ = 7.43–7.39 (m, 4H, ArH), 7.30–7.15 (m, 11H, ArH), 7.13 (s, 1H, NH), 4.86 (s, 2H, CH<sub>2</sub>), 4.77 (s, 2H, CH<sub>2</sub>), 3.56 (s, *J* = 6.2 Hz, 2H, CH<sub>2</sub>), 2.93 (s, *J* = 6.8 Hz, 2H, CH<sub>3</sub>); <sup>13</sup>C NMR (125 MHz, CDCl<sub>3</sub>): δ = 169.4, 166.7, 164.2, 164.0, 149.9, 140.2, 136.1, 136.1, 135.9, 133.0, 130.3, 130.1, 130.1, 129.1, 129.1, 128.9, 128.9, 128.8, 128.8, 128.7, 128.7, 128.7, 128.7, 128.0, 128.0, 114.0, 114.0, 109.8, 44.2, 42.0, 41.7, 34.7; HRMS (TOF ES<sup>+</sup>) m/z: [M+H]<sup>+</sup> calcd for C<sub>32</sub>H<sub>24</sub>ClN<sub>3</sub>O<sub>4</sub> 550.1528; found, 550.1534.

**2,7-Dibenzyl-4-((3-methylphenethyl)amino)pyrrolo[3,4-*e*]isoindole-1,3,6,8(2*H*, 7*H*)-tetraone (3p)**

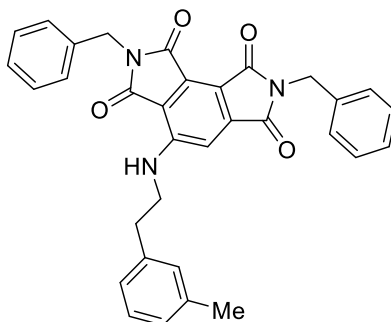

Yellow solid (53%); Mp: 202.6–205.2 °C; IR (KBr): 3449, 3366, 2938, 1757, 1710, 1635, 1522, 869, 807, 702 cm<sup>-1</sup>; <sup>1</sup>H NMR (500 MHz, CDCl<sub>3</sub>): δ = 7.42 (t, *J* = 9.2 Hz, 4H, ArH), 7.31–7.24 (m, 5H, ArH), 7.22 (s, 2H, ArH), 7.13 (s, 1H, NH), 7.11 (s, 4H, ArH), 4.82 (s, 2H, CH<sub>2</sub>), 4.78 (s, 2H, CH<sub>2</sub>), 3.59–3.55 (m, 2H, CH<sub>2</sub>), 2.93 (t, *J* = 7.0 Hz, 2H, CH<sub>2</sub>), 2.30 (s, 3H, CH<sub>3</sub>); <sup>13</sup>C NMR (125 MHz, CDCl<sub>3</sub>): δ = 169.4, 166.7, 164.3, 164.1, 150.0, 140.1, 136.7, 136.1, 136.0, 134.5, 130.3, 129.6, 129.6, 128.9, 128.9, 128.8,

128.8, 128.7, 128.7, 128.7, 128.7, 128.6, 128.6, 128.0, 127.9, 113.8, 113.7, 109.9, 44.6, 41.9, 41.7, 35.0, 21.0; HRMS (TOF ES<sup>+</sup>) m/z: [M+Na]<sup>+</sup> calcd for C<sub>33</sub>H<sub>27</sub>N<sub>3</sub>O<sub>4</sub> 552.1894; found, 552.1902.

**2,7-Dibenzyl-4-((3-fluorobenzyl)amino)pyrrolo[3,4-*e*]isoindole-1,3,6,8(2*H*,7*H*)-tetraone (3q)**

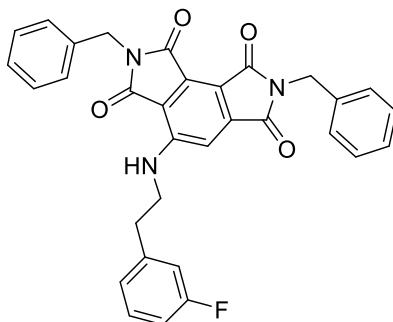

Yellow solid (40%); Mp: 185.6–187.2 °C; IR (KBr): 3462, 3383, 2935, 1751, 1713, 1634, 1524, 864, 783, 691 cm<sup>-1</sup>; <sup>1</sup>H NMR (600 MHz, DMSO-*d*<sub>6</sub>): δ = 7.54–7.46 (m, 1H, ArH), 7.44 (s, 1H, NH), 7.34–7.25 (m, 11H, ArH), 7.19–7.12 (m, 2H, ArH), 7.03–7.00 (m, 1H, ArH), 4.75 (s, 2H, CH<sub>2</sub>), 4.72 (s, 2H, CH<sub>2</sub>), 3.75–3.72 (m, 2H, CH<sub>2</sub>), 2.94 (t, *J* = 7.1 Hz, 2H, CH<sub>2</sub>). <sup>13</sup>C NMR (150 MHz, DMSO-*d*<sub>6</sub>): δ = 169.3, 166.9, 164.5, 164.1, 162.7 (d, *J*<sub>1</sub> = 241.5 Hz), 150.2, 142.1, 142.0, 139.9, 137.0, 136.9, 130.7, 130.7, 130.6, 129.0, 129.0, 127.9, 127.9, 127.9, 127.9, 125.5, 116.1, 116.0, 113.7, 113.5, 113.5, 113.0, 111.3, 43.6, 41.4, 41.3, 34.7. <sup>19</sup>F NMR (564 MHz, DMSO-*d*<sub>6</sub>): δ = -113.51 ppm. HRMS (TOF ES<sup>+</sup>) m/z: [M+H]<sup>+</sup> calcd for C<sub>31</sub>H<sub>22</sub>FN<sub>3</sub>O<sub>4</sub> 534.1824; found, 534.1824.

**4-((4-Methoxyphenethyl)amino)-2,7-bis(2-methylbenzyl)pyrrolo[3,4-*e*]isoindole-1,3,6,8(2*H*,7*H*)-tetraone (3r)**

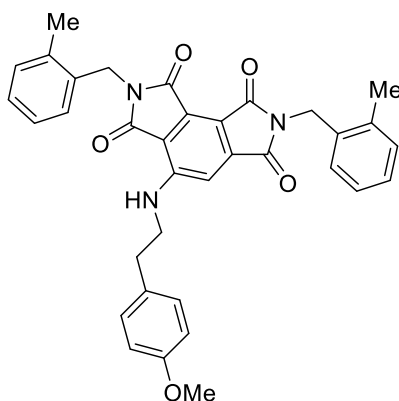

Yellow solid (54%); Mp: 104.5–107.8 °C; IR (KBr): 3523, 3461, 2991, 1744, 1633, 1564, 1514, 835 cm<sup>-1</sup>; <sup>1</sup>H NMR (500 MHz, CDCl<sub>3</sub>): δ = 7.29 (d, *J* = 4.1 Hz, 2H, ArH), 7.23–7.21 (m, 2H, ArH), 7.15 (s, 1H, NH), 7.13–7.10 (m, 6H, ArH), 6.85 (d, *J* = 8.4 Hz, 2H, ArH), 4.84 (s, 2H, CH<sub>2</sub>), 4.81 (s, 2H, CH<sub>2</sub>), 3.76 (s, 3H, CH<sub>3</sub>), 3.59–3.56 (m, 2H,

CH<sub>2</sub>), 2.92 (t, *J* = 6.9 Hz, 2H, CH<sub>2</sub>), 2.48 (d, *J* = 3.3 Hz, 6H, CH<sub>3</sub>). <sup>13</sup>C NMR (125 MHz, CDCl<sub>3</sub>): δ = 169.7, 167.0, 164.4, 164.2, 158.7, 150.1, 140.1, 136.3, 136.3, 134.1, 133.9, 130.5, 130.5, 130.3, 129.7, 129.7, 129.6, 128.9, 128.8, 127.9, 127.8, 126.2, 126.2, 114.3, 114.3, 113.9, 113.7, 109.9, 55.3, 44.7, 39.4, 39.2, 34.6, 19.5, 19.5. HRMS (TOF ES<sup>+</sup>) *m/z*: [M+H]<sup>+</sup> calcd for C<sub>35</sub>H<sub>31</sub>N<sub>3</sub>O<sub>5</sub> 574.2336; found, 574.2327.

**2,7-Bis(2-methylbenzyl)-4-(phenethylamino)pyrrolo[3,4-*e*]isoindole-1,3,6,8(2*H*, 7*H*)-tetraone (3s)**

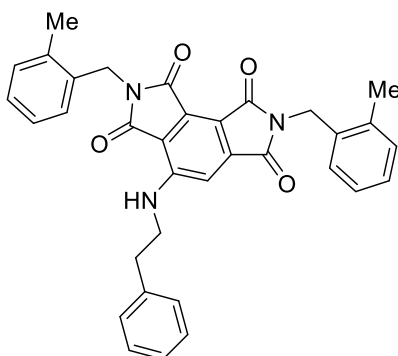

Yellow solid (47%); Mp: 147.6–155.8 °C; IR (KBr): 3447, 3373, 2937, 1748, 1711, 1635, 1525, cm<sup>-1</sup>; <sup>1</sup>H NMR (500 MHz, CDCl<sub>3</sub>): δ = 7.33–7.28 (m, 4H, ArH), 7.26–7.22 (m, 5H, ArH), 7.16 (s, 1H, NH), 7.14–7.09 (m, 5H, ArH), 4.85 (s, 2H, CH<sub>2</sub>), 4.80 (s, 2H, CH<sub>2</sub>), 3.64–3.60 (m, 2H, CH<sub>2</sub>), 2.98 (t, *J* = 7.1 Hz, 2H, CH<sub>2</sub>), 2.48 (t, *J* = 4.3 Hz, 6H, CH<sub>3</sub>). <sup>13</sup>C NMR (125 MHz, CDCl<sub>3</sub>): δ = 169.7, 167.0, 164.4, 164.2, 150.0, 140.1, 137.4, 136.3, 136.3, 134.1, 133.9, 130.5, 130.5, 130.3, 128.9, 128.9, 128.9, 128.8, 128.8, 128.7, 127.9, 127.8, 127.1, 126.2, 126.2, 113.9, 113.7, 109.9, 44.5, 39.4, 39.2, 35.5, 19.5, 19.5. HRMS (TOF ES<sup>+</sup>) *m/z*: [M+H]<sup>+</sup> calcd for C<sub>34</sub>H<sub>29</sub>N<sub>3</sub>O<sub>4</sub> 544.2231; found, 544.2237.

**4-((4-Chlorophenethyl)amino)-2,7-bis(2-methylbenzyl)pyrrolo[3,4-*e*]isoindole-1,3,6,8(2*H*, 7*H*)-tetraone (3t)**

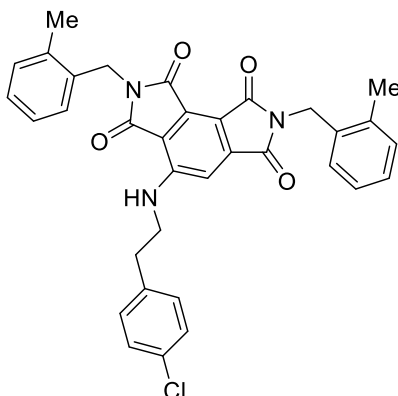

Yellow solid (41%); Mp: 214.2–214.8 °C; IR (KBr): 3449, 3426, 2935, 1750, 1712,

1635, 1525, 835  $\text{cm}^{-1}$ ;  $^1\text{H}$  NMR (500 MHz,  $\text{CDCl}_3$ ):  $\delta$  = 7.29–7.22 (m, 5H, ArH), 7.20–7.15 (m, 2H, ArH), 7.14 (s, 1H, NH), 7.11 (d,  $J$  = 3.8 Hz, 2H, ArH), 4.85 (s, 2H,  $\text{CH}_2$ ), 4.81 (s, 2H,  $\text{CH}_2$ ), 3.62–3.58 (m, 2H,  $\text{CH}_2$ ), 2.95 (t,  $J$  = 6.9 Hz, 2H,  $\text{CH}_2$ ), 2.48 (t,  $J$  = 1.2 Hz, 6H,  $\text{CH}_3$ ).  $^{13}\text{C}$  NMR (125 MHz,  $\text{CDCl}_3$ ):  $\delta$  = 169.7, 166.9, 164.4, 164.2, 149.9, 140.2, 136.3, 136.0, 134.0, 133.8, 133.0, 130.5, 130.3, 130.1, 130.1, 129.1, 129.1, 128.9, 128.9, 128.8, 128.0, 127.8, 126.2, 126.2, 114.1, 113.9, 109.8, 44.3, 39.4, 39.2, 34.8, 19.5, 19.5. HRMS (TOF  $\text{ES}^+$ )  $m/z$ :  $[\text{M}+\text{H}]^+$  calcd for  $\text{C}_{34}\text{H}_{28}\text{ClN}_3\text{O}_4$  578.1841; found, 578.1847.

**2,7-Bis(2-methylbenzyl)-4-((3-methylphenethyl)amino)pyrrolo[3,4-*e*]isoindole-1,3,6,8(2*H*,7*H*)-tetraone (3u)**

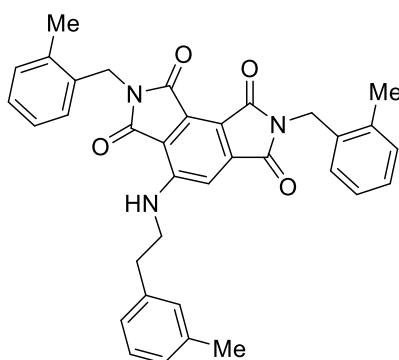

Yellow solid (49%); Mp: 194.4–197.1  $^{\circ}\text{C}$ ; IR (KBr): 3451, 3373, 2932, 1751, 1712, 1635, 1521, 855, 791, 744  $\text{cm}^{-1}$ ;  $^1\text{H}$  NMR (500 MHz,  $\text{CDCl}_3$ ):  $\delta$  = 7.29 (d,  $J$  = 6.9 Hz, 2H, ArH), 7.23 (t,  $J$  = 8.3 Hz, 1H, ArH), 7.16 (s, 1H, NH), 7.13 (t,  $J$  = 7.0 Hz, 1H, ArH), 4.85 (s, 2H,  $\text{CH}_2$ ), 4.81 (s, 2H,  $\text{CH}_2$ ), 3.61–3.57 (m, 2H,  $\text{CH}_2$ ), 2.94 (t,  $J$  = 7.0 Hz, 2H,  $\text{CH}_2$ ), 2.48 (t,  $J$  = 6.6 Hz, 6H,  $\text{CH}_3$ ), 2.31 (s, 3H,  $\text{CH}_3$ ).  $^{13}\text{C}$  NMR (125 MHz,  $\text{CDCl}_3$ ):  $\delta$  = 169.7, 167.0, 164.4, 164.2, 150.1, 140.1, 136.7, 136.3, 136.3, 134.5, 134.1, 133.9, 130.5, 130.5, 130.3, 129.6, 129.6, 128.9, 128.8, 128.8, 128.6, 127.9, 127.8, 126.2, 126.2, 113.9, 113.7, 109.9, 44.6, 39.4, 39.2, 35.0, 21.1, 19.5, 19.5. HRMS (TOF  $\text{ES}^+$ )  $m/z$ :  $[\text{M}+\text{H}]^+$  calcd for  $\text{C}_{35}\text{H}_{31}\text{N}_3\text{O}_4$  558.2387; found, 558.2390.

**4-((3-Fluorophenethyl)amino)-2,7-bis(2-methylbenzyl)pyrrolo[3,4-*e*]isoindole-1,3,6,8(2*H*,7*H*)-tetraone (3v)**



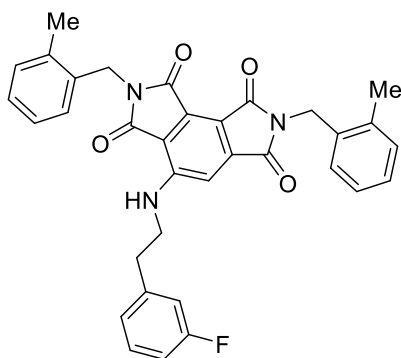

Yellow solid (38%); Mp: 213.0–216.3 °C; IR (KBr): 3448, 3417, 2934, 1745, 1709, 1634, 1526, 1050, 831, 747  $\text{cm}^{-1}$ ;  $^1\text{H}$  NMR (500 MHz,  $\text{CDCl}_3$ ):  $\delta$  = 7.31–7.21 (m, 6H, ArH), 7.16–7.09 (m, 5H, ArH), 7.01 (d,  $J$  = 8.8 Hz, 1H, NH), 6.95 (t,  $J$  = 8.6 Hz, 2H, ArH), 4.85 (s, 2H,  $\text{CH}_2$ ), 4.81 (s, 2H,  $\text{CH}_2$ ), 3.65–3.61 (m, 2H,  $\text{CH}_2$ ), 2.98 (t,  $J$  = 7.0 Hz, 2H,  $\text{CH}_2$ ), 2.98 (t,  $J$  = 4.8 Hz, 6H,  $\text{CH}_3$ );  $^{13}\text{C}$  NMR (125 MHz,  $\text{CDCl}_3$ ):  $\delta$  = 169.7, 166.9, 164.4, 164.2, 163.1 (d,  $J_1$  = 245.1 Hz), 149.9, 140.2, 140.0 (d,  $J_3$  = 7.5 Hz), 136.3, 133.9 (d,  $J_2$  = 21.3 Hz),, 134.0, 133.8, 130.4, 130.3, 128.9, 128.8, 127.9, 127.8, 126.2, 126.2, 124.4, 124.4, 115.6 (d,  $J_2$  = 21.3 Hz), 114.2, 114.1, 114.0, 113.9, 109.8, 44.1, 39.4, 39.2, 35.1, 19.5, 19.5.  $^{19}\text{F}$  NMR (470 MHz,  $\text{CDCl}_3$ ):  $\delta$  = –112.5 ppm. HRMS (TOF  $\text{ES}^+$ )  $m/z$ :  $[\text{M}+\text{H}]^+$  calcd for  $\text{C}_{34}\text{H}_{28}\text{FN}_3\text{O}_4$  562.2137; found, 562.2137.

**2,7-Dicyclohexyl-4-((4-methoxyphenethyl)amino)pyrrolo[3,4-*e*]isoindole-1,3,6,8(2*H*,7*H*)-tetraone (3w)**

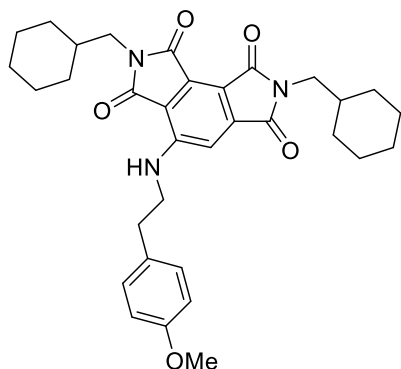

Yellow solid (49%); Mp: 260.5–262.3 °C; IR (KBr): 3471, 3453, 2935, 1745, 1710, 1636, 1517, 843  $\text{cm}^{-1}$ ;  $^1\text{H}$  NMR (500 MHz,  $\text{CDCl}_3$ ):  $\delta$  = 7.22 (t,  $J$  = 5.3 Hz, 1H, NH), 7.17 (d,  $J$  = 8.3 Hz, 3H, ArH), 6.88 (d,  $J$  = 8.5 Hz, 2H, ArH), 4.13–4.02 (m, 2H, CH), 3.80 (s, 3H,  $\text{CH}_3$ ), 3.61–3.57 (m, 2H,  $\text{CH}_2$ ), 2.95 (d,  $J$  = 7.0 Hz, 2H,  $\text{CH}_2$ ), 2.22–2.14 (m, 4H,  $\text{CH}_2$ ), 1.86 (d,  $J$  = 12.8 Hz, 4H,  $\text{CH}_2$ ), 1.69 (d,  $J$  = 11.4 Hz, 6H,  $\text{CH}_2$ ), 1.39–1.24 (m, 6H,  $\text{CH}_2$ );  $^{13}\text{C}$  NMR (125 MHz,  $\text{CDCl}_3$ ):  $\delta$  = 170.1, 167.3, 164.8, 164.7, 158.6, 149.8, 140.0, 130.1, 129.7, 129.7, 114.3, 114.3, 114.3, 113.8, 113.7, 109.4, 55.3, 51.3, 51.0, 44.6, 34.6, 29.8, 29.8, 29.7, 29.7, 26.0, 26.0, 26.0, 26.0, 25.1. HRMS (TOF  $\text{ES}^+$ )  $m/z$ :  $[\text{M}+\text{Na}]^+$  calcd for  $\text{C}_{31}\text{H}_{35}\text{N}_3\text{O}_5$  552.2469; found, 552.2469.

**2,7-Dicyclohexyl-4-((4-methylphenethyl)amino)pyrrolo[3,4-*e*]isoindole-1,3,6,8 (2*H*,7*H*)-tetraone (3x)**

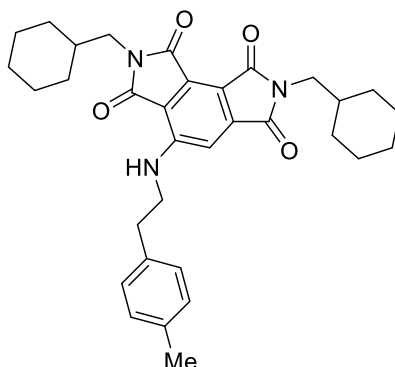

Yellow solid (44%); Mp: 267.4–268.3 °C; IR (KBr): 3462, 3441, 2941, 1746, 1710, 1627, 1518, 848  $\text{cm}^{-1}$ ;  $^1\text{H}$  NMR (500 MHz,  $\text{CDCl}_3$ ):  $\delta$  = 7.23 (t,  $J$  = 5.1 Hz, 1H, NH), 7.18 (s, 1H, ArH), 7.15 (s, 4H, ArH), 4.13–4.02 (m, 2H, CH), 3.62–3.59 (m, 2H,  $\text{CH}_2$ ), 2.96 (t,  $J$  = 7.0 Hz, 2H,  $\text{CH}_2$ ), 2.33 (s, 3H,  $\text{CH}_3$ ), 2.25–2.14 (m, 4H,  $\text{CH}_2$ ), 1.86 (d,  $J$  = 12.2 Hz, 4H,  $\text{CH}_2$ ), 1.69 (d,  $J$  = 11.0 Hz, 6H,  $\text{CH}_2$ ), 1.39–1.24 (m, 6H,  $\text{CH}_2$ );  $^{13}\text{C}$  NMR (125 MHz,  $\text{CDCl}_3$ ):  $\delta$  = 170.1, 167.3, 164.8, 164.7, 149.8, 140.0, 136.6, 134.6, 130.1, 129.6, 129.6, 128.6, 128.6, 113.8, 113.7, 109.4, 51.2, 51.0, 44.6, 35.0, 29.8, 29.8, 29.7, 29.7, 26.0, 26.0, 26.0, 26.0, 25.1, 25.1, 21.1. HRMS (TOF  $\text{ES}^+$ )  $m/z$ :  $[\text{M}+\text{H}]^+$  calcd for  $\text{C}_{31}\text{H}_{35}\text{N}_3\text{O}_4$  514.2700; found, 514.2704.

**2,7-Dicyclohexyl-4-(phenethylamino)pyrrolo[3,4-*e*]isoindole-1,3,6,8(2*H*,7*H*)-tetraone (3y)**

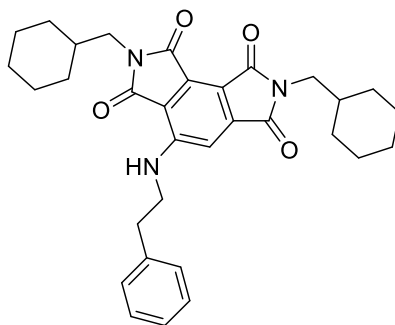

Yellow solid (43%); Mp: 285.6–288.4 °C; IR (KBr): 3498, 3468, 2934, 1746, 1704, 1634, 1520  $\text{cm}^{-1}$ ;  $^1\text{H}$  NMR (500 MHz,  $\text{CDCl}_3$ ):  $\delta$  = 7.35 (t,  $J$  = 7.4 Hz, 2H, ArH), 7.28–7.20 (m, 4H, ArH), 4.13–4.02 (m, 2H, CH), 3.01 (m,  $J$  = 7.0 Hz, 2H,  $\text{CH}_2$ ), 2.25–2.14 (m, 4H,  $\text{CH}_2$ ), 1.86 (d,  $J$  = 12.7 Hz, 4H,  $\text{CH}_2$ ), 1.69 (d,  $J$  = 11.6 Hz, 6H,  $\text{CH}_2$ ), 1.39–1.18 (m, 6H,  $\text{CH}_2$ );  $^{13}\text{C}$  NMR (125 MHz,  $\text{CDCl}_3$ ):  $\delta$  = 170.1, 167.3, 164.8, 164.7, 149.8, 140.0, 137.7, 130.1, 128.9, 128.9, 128.7, 128.7, 127.0, 113.9, 113.8, 109.3, 51.3, 51.0, 44.4, 35.5, 29.8, 29.8, 29.7, 29.7, 26.0, 26.0, 26.0, 26.0, 25.1, 25.1. HRMS (TOF  $\text{ES}^+$ )

m/z:  $[M+H]^+$  calcd for  $C_{30}H_{33}N_3O_4$  500.2544; found, 500.2545.

**4-((4-Chlorophenethyl)amino)-2,7-dicyclohexylpyrrolo[3,4-*e*]isoindole-1,3,6,8 (2*H*,7*H*)-tetraone (3z)**

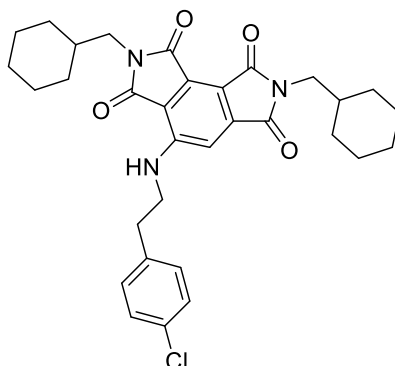

Yellow solid (40%); Mp: 260.5–262.3 °C; IR (KBr): 3430, 3397, 2987, 1745, 1711, 1635, 1520, 834  $cm^{-1}$ ;  $^1H$  NMR (500 MHz,  $CDCl_3$ ):  $\delta$  = 7.32 (d,  $J$  = 8.1 Hz, 3H, ArH), 7.19 (d,  $J$  = 8.1 Hz, 2H, ArH), 7.01 (s, 1H, NH), 4.14–4.02 (m, 2H, CH), 3.64–3.60 (m, 2H,  $CH_2$ ), 2.98 (t,  $J$  = 6.8 Hz, 2H,  $CH_2$ ), 2.22–2.04 (m, 4H,  $CH_2$ ), 1.86 (d,  $J$  = 12.4 Hz, 4H,  $CH_2$ ), 1.69 (d,  $J$  = 11.3 Hz, 6H,  $CH_2$ ), 1.50–0.86 (m, 6H,  $CH_2$ );  $^{13}C$  NMR (125 MHz,  $CDCl_3$ ):  $\delta$  = 170.1, 167.2, 164.7, 164.7, 149.7, 140.0, 136.2, 133.0, 130.1, 130.1, 130.1, 130.1, 129.1, 114.0, 114.0, 109.2, 51.3, 51.1, 44.2, 34.8, 29.8, 29.8, 29.7, 29.7, 26.0, 26.0, 26.0, 26.0, 25.1, 25.1. HRMS (TOF  $ES^+$ ) m/z:  $[M+Na]^+$  calcd for  $C_{30}H_{32}N_3O_4$  556.1974; found, 556.1976.

**2,7-Dicyclohexyl-4-((3-methylphenethyl)amino)pyrrolo[3,4-*e*]isoindole-1,3,6,8(2*H*,7*H*)-tetraone (3a')**

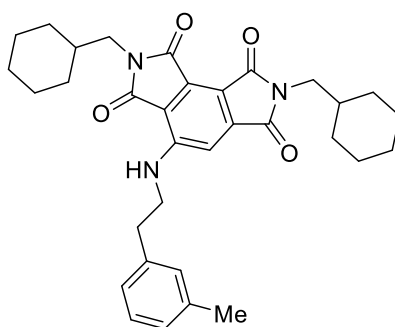

Yellow solid (47%); Mp: 269.5–270.4 °C; IR (KBr): 3465, 3439, 2939, 1744, 1714, 1630, 1515, 892, 780, 685  $cm^{-1}$ ;  $^1H$  NMR (500 MHz,  $CDCl_3$ ):  $\delta$  = 7.23 (t,  $J$  = 5.3 Hz, 1H, NH), 7.18 (s, 1H, ArH), 7.15 (s, 4H, ArH), 4.13–4.02 (m, 2H, CH), 3.63–3.57 (m, 2H,  $CH_2$ ), 2.96 (t,  $J$  = 7.0 Hz, 2H,  $CH_2$ ), 2.33 (s, 3H,  $CH_3$ ), 2.25–2.14 (m, 4H,  $CH_2$ ), 1.86 (d,  $J$  = 12.1 Hz, 4H,  $CH_2$ ), 1.69 (d,  $J$  = 10.8 Hz, 6H,  $CH_2$ ), 1.39–1.24 (m, 6H,  $CH_2$ );  $^{13}C$  NMR (125 MHz,  $CDCl_3$ ):  $\delta$  = 170.1, 167.3, 164.8, 164.7, 149.8, 140.0, 136.6, 134.6,

130.1, 129.6, 129.6, 128.6, 128.6, 113.8, 113.7, 109.4, 51.2, 51.0, 44.6, 35.0, 29.8, 29.8, 29.7, 29.7, 26.0, 26.0, 26.0, 26.0, 25.1, 25.1, 21.1. HRMS (TOF ES<sup>+</sup>) m/z: [M+H]<sup>+</sup> calcd for C<sub>31</sub>H<sub>35</sub>N<sub>3</sub>O<sub>4</sub> 514.2700; found, 514.2704.

**2,7-Dicyclohexyl-4-((3-fluorophenethyl)amino)pyrrolo[3,4-*e*]isoindole-1,3,6,8(2*H*, 7*H*)-tetraone (3b')**

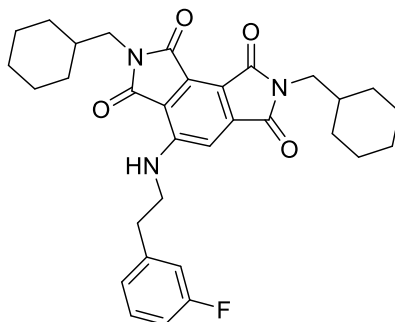

Yellow solid (37%); Mp: 281.6–288.4 °C; IR (KBr): 3495, 3481, 2940, 1745, 1708, 1635, 1520, 834, 866, 781, 679 cm<sup>-1</sup>; <sup>1</sup>H NMR (500 MHz, CDCl<sub>3</sub>): δ = 7.34–7.30 (m, 1H, ArH), 7.21 (t, *J* = 5.0 Hz, 2H, ArH), 7.04 (d, *J* = 3.8 Hz, 1H, NH), 7.97 (t, *J* = 8.3 Hz, 2H, ArH), 4.14–4.02 (m, 2H, CH), 3.66–3.62 (m, 2H, CH<sub>2</sub>), 3.01 (t, *J* = 7.0 Hz, 2H, CH<sub>2</sub>), 2.25–2.13 (m, 4H, CH<sub>2</sub>), 1.86 (d, *J* = 14.8 Hz, 4H, CH<sub>2</sub>), 1.69 (d, *J* = 11.4 Hz, 6H, CH<sub>2</sub>), 1.40–1.24 (m, 6H, CH<sub>2</sub>); <sup>13</sup>C NMR (125 MHz, CDCl<sub>3</sub>): δ = 170.1, 167.2, 164.7, 164.7, 163.1 (d, *J*<sub>1</sub> = 246.3 Hz), 149.7, 140.2, 130.4 (d, *J*<sub>3</sub> = 7.5 Hz), 130.1, 124.4 (d, *J*<sub>4</sub> = 2.5 Hz), 115.6 (d, *J*<sub>2</sub> = 21.3 Hz), 114.0 (d, *J*<sub>2</sub> = 21.3 Hz), 114.1, 114.0, 109.2, 51.3, 51.1, 44.1, 35.1, 29.8, 29.8, 29.7, 29.7, 26.0, 26.0, 26.0, 26.0, 25.1, 25.1. <sup>19</sup>F NMR (470 MHz, CDCl<sub>3</sub>): δ = -112.6 ppm. HRMS (TOF ES<sup>+</sup>) m/z: [M+H]<sup>+</sup> calcd for C<sub>30</sub>H<sub>32</sub>FN<sub>3</sub>O<sub>4</sub> 518.2450; found, 518.2440.

**4-((4-Methoxyphenethyl)amino)pyrrolo[3,4-*e*]isoindole-1,3,6,8(2*H*, 7*H*)-tetraone (3c')**

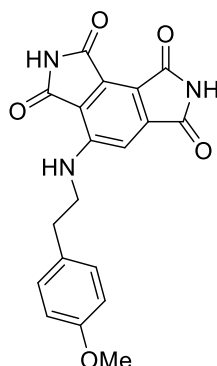

Yellow solid (52%); Mp: 293.1–301.5 °C; IR (KBr): 3515, 3430, 2996, 1743, 1635, 1529, 1448, 835 cm<sup>-1</sup>; <sup>1</sup>H NMR (500 MHz, DMSO-*d*<sub>6</sub>): δ = 11.32 (s, 1H, NH), 11.30 (s, 1H, NH), 7.41 (s, 1H, NH), 7.27 (s, 1H, ArH), 7.21 (s, 1H, ArH), 7.21 (d, *J* = 8.4 Hz, s20

2H, ArH), 6.86 (d,  $J = 8.5$  Hz, 2H, ArH), 3.71 (s, 3H, CH<sub>3</sub>), 3.65 (d,  $J = 6.6$  Hz, 2H, CH<sub>2</sub>), 2.85 (t,  $J = 7.0$  Hz, 2H, CH<sub>2</sub>); <sup>13</sup>C NMR (125 MHz, DMSO-*d*<sub>6</sub>):  $\delta = 171.3, 168.5, 166.1, 165.8, 158.4, 150.3, 141.3, 131.6, 130.9, 130.3, 130.3, 114.9, 114.4, 114.4, 114.1, 110.1, 55.5, 44.2, 34.3$ . HRMS (TOF ES<sup>+</sup>)  $m/z$ : [M+H]<sup>+</sup> calcd for C<sub>19</sub>H<sub>15</sub>N<sub>3</sub>O<sub>5</sub> 366.1084; found, 366.1075.

**4-((4-Methylphenethyl)amino)pyrrolo[3,4-*e*]isoindole-1,3,6,8(2*H*,7*H*)-tetraone (3d')**

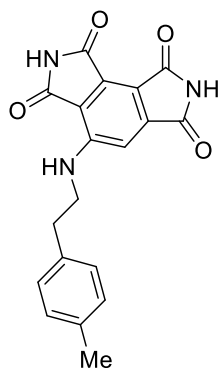

Yellow solid (48%); Mp: 339.0–340.0 °C; IR (KBr): 3457, 3434, 2994, 1742, 1701, 1638, 1529, 832 cm<sup>-1</sup>; <sup>1</sup>H NMR (500 MHz, DMSO-*d*<sub>6</sub>):  $\delta = 11.33$  (s, 1H, NH), 11.31 (s, 1H, NH), 7.41 (t,  $J = 6.0$  Hz, 1H, NH), 7.29 (s, 1H, ArH), 7.18 (t,  $J = 7.9$  Hz, 1H, ArH), 7.11 (t,  $J = 7.8$  Hz, 2H, ArH), 3.68–3.64 (m, 2H, CH<sub>2</sub>), 2.86 (t,  $J = 7.1$  Hz, 2H, CH<sub>2</sub>), 2.26 (s, 3H, CH<sub>3</sub>); <sup>13</sup>C NMR (125 MHz, DMSO-*d*<sub>6</sub>):  $\delta = 171.3, 168.5, 166.1, 165.8, 150.2, 141.3, 136.0, 135.8, 131.5, 129.5, 129.5, 129.2, 129.2, 114.9, 114.1, 110.1, 44.0, 34.7, 21.1$ . HRMS (TOF ES<sup>+</sup>)  $m/z$ : [M+H]<sup>+</sup> calcd for C<sub>19</sub>H<sub>15</sub>N<sub>3</sub>O<sub>4</sub> 350.1135; found, 350.1127.

**4-(Phenethylamino)pyrrolo[3,4-*e*]isoindole-1,3,6,8(2*H*,7*H*)-tetraone (3e')**

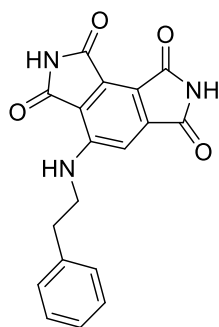

Yellow solid (44%); Mp: 325.8–332.6 °C; IR (KBr): 3517, 3442, 2994, 1744, 1631, 1532, 1455 cm<sup>-1</sup>; <sup>1</sup>H NMR (500 MHz, DMSO-*d*<sub>6</sub>):  $\delta = 11.31$  (s, 2H, NH), 7.43 (t,  $J = 5.9$  Hz, 1H, NH), 7.30 (m,  $J = 4.1$  Hz, 5H, ArH), 7.23–7.19 (m, 1H, ArH), 3.71–3.67 (m, 2H, CH<sub>2</sub>), 2.91 (t,  $J = 7.1$  Hz, 2H, CH<sub>2</sub>); <sup>13</sup>C NMR (125 MHz, DMSO-*d*<sub>6</sub>):  $\delta =$

171.3, 168.5, 166.1, 165.8, 150.2, 141.3, 139.1, 131.5, 129.3, 129.3, 128.9, 128.9, 126.8, 114.9, 114.1, 110.1, 43.9, 35.1. HRMS (TOF ES<sup>+</sup>) m/z: [M+Na]<sup>+</sup> calcd for C<sub>18</sub>H<sub>13</sub>N<sub>3</sub>O<sub>4</sub> 358.0798; found, 358.0792.

**4-((4-Chlorophenethyl)amino)pyrrolo[3,4-*e*]isoindole-1,3,6,8(2*H*,7*H*)-tetraone (3f')**

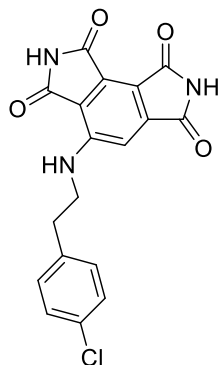

Yellow solid (41%); Mp: 315.6–320.6 °C; IR (KBr): 3452, 3427, 2927, 1713, 1630, 1527, 1374, 836 cm<sup>-1</sup>; <sup>1</sup>H NMR (500 MHz, DMSO-*d*<sub>6</sub>): δ = 11.23 (s, 1H, NH), 11.31 (s, 1H, NH), 7.41 (t, *J* = 6.0 Hz, 1H, NH), 7.35–7.31 (m, 4H, ArH), 7.29 (s, 1H, ArH), 3.70–3.66 (m, 2H, CH<sub>2</sub>), 2.91 (t, *J* = 7.1 Hz, 2H, CH<sub>2</sub>); <sup>13</sup>C NMR (125 MHz, DMSO-*d*<sub>6</sub>): δ = 171.2, 168.5, 166.0, 165.8, 150.2, 141.3, 138.2, 131.5, 131.2, 131.2, 128.8, 128.8, 128.8, 115.0, 114.2, 110.1, 43.7, 34.0. HRMS (TOF ES<sup>+</sup>) m/z: [M+H]<sup>+</sup> calcd for C<sub>18</sub>H<sub>12</sub>ClN<sub>3</sub>O<sub>4</sub> 370.0589; found, 370.0593.

**4-((3-Methylphenethyl)amino)pyrrolo[3,4-*e*]isoindole-1,3,6,8(2*H*,7*H*)-tetraone (3g')**

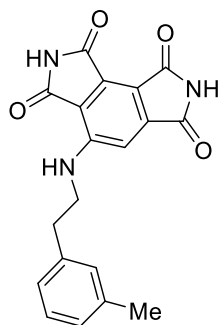

Yellow solid (50%); Mp: 302.5–308.6 °C; IR (KBr): 3348, 3309, 2996, 1743, 1635, 1530, 1452, 831, 781, 725 cm<sup>-1</sup>; <sup>1</sup>H NMR (600 MHz, DMSO-*d*<sub>6</sub>): δ = 11.32 (s, 1H, NH), 11.30 (s, 1H, NH), 7.40 (t, *J* = 4.9 Hz, 1H, NH), 7.28 (s, 1H, ArH), 7.18 (d, *J* = 6.5 Hz, 2H, ArH), 7.10 (d, *J* = 6.5 Hz, 2H, ArH), 3.67–3.64 (m, 2H, CH<sub>2</sub>), 2.86 (t, *J* = 5.8 Hz, 2H, CH<sub>2</sub>), 2.26 (s, 3H, CH<sub>3</sub>); <sup>13</sup>C NMR (125 MHz, DMSO-*d*<sub>6</sub>): δ = 171.3, 168.5, 166.0, 165.8, 150.3, 141.3, 136.0, 135.8, 131.5, 129.5, 129.5, 129.2, 129.2, 115.0, 114.1, 110.1, 44.0, 34.7, 21.1. HRMS (TOF ES<sup>+</sup>) m/z: [M+H]<sup>+</sup> calcd for C<sub>19</sub>H<sub>15</sub>N<sub>3</sub>O<sub>4</sub> 350.1135; found, 350.1135.

350.1127.

**4-((3-fluorophenethyl)amino)pyrrolo[3,4-*e*]isoindole-1,3,6,8(2*H*,7*H*)-tetraone (3h')**

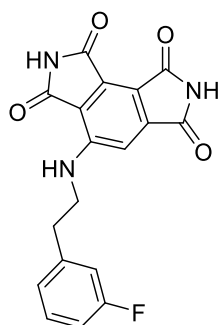

Yellow solid (40%); Mp: 328.6–335.9 °C; IR (KBr): 3347, 3308, 2995, 1742, 1634, 1529, 1452, 831, 780, 724 cm<sup>-1</sup>; <sup>1</sup>H NMR (600 MHz, DMSO-*d*<sub>6</sub>): δ = 11.25 (s, 1H, NH), 11.22 (s, 1H, NH), 7.37 (s, 1H, NH), 7.30 (d, *J* = 6.3 Hz, 2H, ArH), 7.01–7.05 (m, 2H, ArH), 6.95 (s, 1H, ArH), 3.73–3.69 (m, 2H, CH<sub>2</sub>), 3.99 (t, *J* = 7.0 Hz, 2H, CH<sub>2</sub>). <sup>13</sup>C NMR (150 MHz, DMSO-*d*<sub>6</sub>): δ = 171.1, 168.2, 166.1, 165.9, 162.8 (d, *J*<sub>1</sub> = 243.8 Hz), 150.2, 141.4, 141.2 (d, *J*<sub>3</sub> = 8.8 Hz), 131.4, 130.4 (d, *J*<sub>3</sub> = 8.8 Hz), 124.9 (d, *J*<sub>4</sub> = 2.5 Hz), 115.8 (d, *J*<sub>2</sub> = 21.3 Hz), 115.2, 114.4, 113.5 (d, *J*<sub>2</sub> = 21.3 Hz), 109.6, 43.7, 34.9. <sup>19</sup>F NMR (564 MHz, DMSO-*d*<sub>6</sub>): δ = -113.1 ppm. HRMS (TOF ES<sup>+</sup>) *m/z*: [M+H]<sup>+</sup> calcd for C<sub>18</sub>H<sub>12</sub>FN<sub>3</sub>O<sub>4</sub> 354.0885; found, 354.0876.

**2,7-dibenzyl-4-((4-methoxybenzyl)amino)pyrrolo[3,4-*e*]isoindole-1,3,6,8(2*H*,7*H*)-tetraone (3i')**

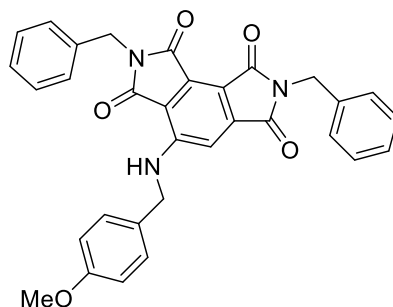

Yellow solid (53%); Mp: 213.5–214.8 °C; IR (KBr): 3449, 3376, 2984, 1746, 1711, 1634, 1517, 830 cm<sup>-1</sup>; <sup>1</sup>H NMR (600 MHz, DMSO-*d*<sub>6</sub>): δ = 8.10 (t, 1H, *J* = 6.2 Hz, NH), 7.35–7.24 (m, 13H, ArH), 6.90 (d, *J* = 8.6 Hz, 2H, ArH), 4.78 (s, 2H, CH<sub>2</sub>), 4.72 (s, 2H, CH), 4.64 (d, *J* = 6.2 Hz, 2H, CH<sub>2</sub>), 3.71 (s, 3H, CH<sub>3</sub>); <sup>13</sup>C NMR (150 MHz, DMSO-*d*<sub>6</sub>): δ = 169.2, 167.0, 164.5, 164.1, 159.0, 150.1, 139.8, 137.0, 137.0, 130.7, 130.2, 129.0, 129.0, 129.0, 129.0, 128.9, 128.9, 128.0, 128.0, 127.9, 127.9, 127.9, 127.9, 114.6, 114.6, 114.0, 113.3, 111.2, 55.5, 45.6, 41.5, 41.3. HRMS (TOF ES<sup>+</sup>) *m/z*: [M+Na]<sup>+</sup> calcd for C<sub>32</sub>H<sub>25</sub>N<sub>3</sub>O<sub>5</sub> 554.1686; found, 554.1694.

**4-((4-methylbenzyl)amino)-2,7-bis(thiophen-2-ylmethyl)pyrrolo[3,4-*e*]isoindole-1,3,6,8(2*H*,7*H*)-tetraone (3j')**

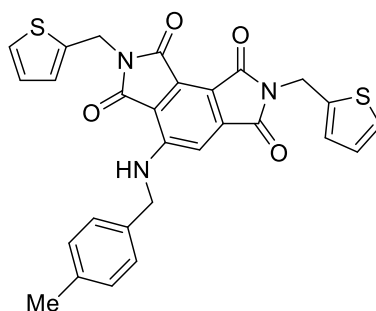

Yellow solid (43%); Mp: 204.6–208.2 °C; IR (KBr): 3447, 3358, 2965, 1748, 1644, 1526, 1432, 851, 782, 683  $\text{cm}^{-1}$ ;  $^1\text{H}$  NMR (600 MHz,  $\text{DMSO-}d_6$ ):  $\delta$  = 8.18 (t,  $J$  = 6.3 Hz, 1H, NH), 7.42 (ddd,  $J$  = 19.2, 5.1, 1.3 Hz, 2H, ArH), 7.25 (d,  $J$  = 8.6 Hz, 3H, ArH), 7.15 – 7.10 (m, 3H, ArH), 7.05 (d,  $J$  = 3.5 Hz, 1H, ArH), 6.95 (ddd,  $J$  = 16.8, 5.1, 3.4 Hz, 2H, ArH), 4.88 (d,  $J$  = 18.4 Hz, 4H,  $\text{CH}_2$ ), 4.67 (d,  $J$  = 6.3 Hz, 2H,  $\text{CH}_2$ ), 2.24 (s, 3H,  $\text{CH}_3$ ).  $^{13}\text{C}$  NMR (125 MHz,  $\text{DMSO-}d_6$ ):  $\delta$  = 168.67, 166.43, 164.01, 163.59, 150.13, 139.63, 138.84, 138.80, 136.87, 135.33, 130.60, 129.71, 127.71, 127.58, 127.43, 127.37, 126.67, 113.85, 113.03, 111.39, 45.82, 36.16, 35.96, 21.12. HRMS (TOF  $\text{ES}^+$ )  $m/z$ :  $[\text{M}+\text{H}]^+$  calcd for  $\text{C}_{28}\text{H}_{21}\text{N}_3\text{O}_4\text{S}_2$  528.1047; found, 528.1046.

**2,7-Dibenzyl-4-((4-methoxyphenyl)amino)pyrrolo[3,4-*e*]isoindole-1,3,6,8(2*H*,7*H*)-tetraone (3k')**

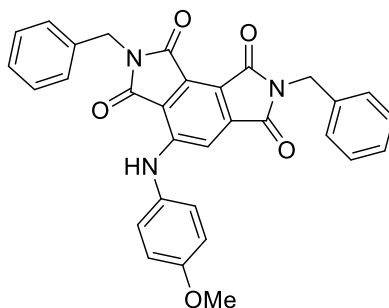

Yellow solid (55%); Mp: 220.4–222.1 °C; IR (KBr): 3483, 3445, 2989, 1745, 1714, 1636, 1517, 831  $\text{cm}^{-1}$ ;  $^1\text{H}$  NMR (600 MHz,  $\text{DMSO-}d_6$ ):  $\delta$  = 9.13 (s, 1H, NH), 7.35–7.24 (m, 12H, ArH), 7.20 (s, 1H, ArH), 7.06–7.03 (m, 2H, ArH), 4.78 (s, 2H,  $\text{CH}_2$ ), 4.73 (s, 2H,  $\text{CH}_2$ ), 3.80 (s, 3H,  $\text{CH}_3$ );  $^{13}\text{C}$  NMR (150 MHz,  $\text{DMSO-}d_6$ ):  $\delta$  = 168.8, 166.8, 164.4, 164.0, 158.2, 148.8, 139.6, 136.9, 131.0, 130.8, 129.1, 129.1, 129.1, 129.0, 129.0, 129.0, 128.0, 128.0, 128.0, 127.9, 127.9, 127.9, 127.1, 127.1, 115.4, 114.7, 114.7, 111.6, 55.8, 41.5, 41.4. HRMS (TOF  $\text{ES}^+$ )  $m/z$ :  $[\text{M}+\text{H}]^+$  calcd for  $\text{C}_{31}\text{H}_{23}\text{N}_3\text{O}_5$  518.1710; found, 518.1700.



## The proposed mechanism of the cascade reaction

The proposed mechanism is shown in Scheme 2. First, the  $\alpha$ -C of the substrate **1h** attacks the double bond of the maleimide derivative **2b** promoted by the base *via* Michael addition to form the intermediate **4n**, which undergoes an imine–enamine tautomerism to obtain the intermediate **5n**. Then, the intermediate **5n** with substrate **2b** enters a bis-Michael addition promoted by the base **2b** to form the intermediate **6n**. The key intermediate **6n** loses  $\text{HNO}_2$  to generate the intermediate **7n**, followed by dehydrogenation and then the loss of an alkyl amine to generate the final product **3n**.

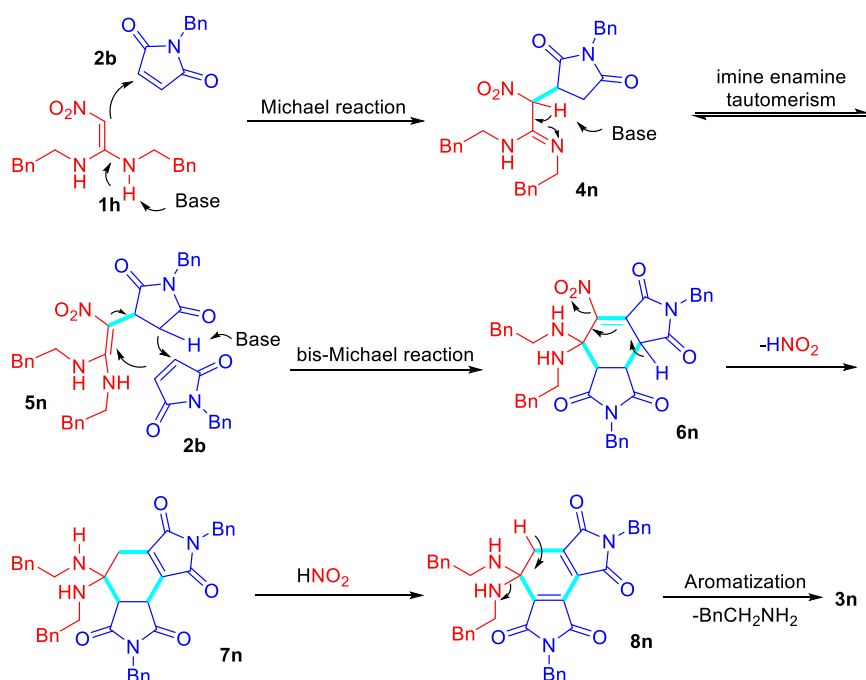

**Scheme S1.** The proposed mechanism of the cascade reaction.

## Verification of reaction mechanisms

To verify the rationality of the mechanism, we packed 1,1-enediamine (**1h**) (0.1 mmol) and maleimide (**2b**) (0.2 mmol) into a round bottom flask. The reaction was carried out in DMF solvent at 100 °C for 20 minutes, with continuous sampling. After the reaction, the obtained intermediate samples were detected by the high-pressure liquid chromatography-high-resolution mass spectrometry (HPLC-HRMS) system. HRMS (TOF  $\text{ES}^+$ ):  $m/z$  calcd. for

$C_{18}H_{22}N_3O_2$   $[M+H]^+$ , 312.1707; found, 312.1701, which is the HRMS spectrum of substrate **1h** (SI, Figure S82); HRMS (TOF ES<sup>+</sup>):  $m/z$  calcd. for  $C_{11}H_9NO_2$   $[M+H]^+$ , 210.0525; found, 210.0522, which is the HRMS spectra of substrate **2b** (SI, Figure S83); HRMS (TOF ES<sup>+</sup>):  $m/z$  calcd. for  $C_{29}H_{31}N_4O_4$   $[M+H]^+$ , 499.2340; found, 499.2346. HRMS (TOF ES<sup>+</sup>):  $m/z$  calcd. for  $C_{29}H_{31}N_4O_4$   $[M+H]^+$ , 499.2340; found, 499.2344. There are the HRMS spectra of intermediates **4n–5n** (SI, Figure S84–S85). HRMS (TOF ES<sup>+</sup>):  $m/z$  calcd. for  $C_{40}H_{38}N_5O_6$   $[M+H]^+$ , 684.2817; found, 684.2809. Which is the HRMS spectra of intermediates **6n** (SI, Figure S86); HRMS (TOF ES<sup>+</sup>):  $m/z$  calcd. for  $C_{40}H_{39}N_4O_4$   $[M+H]^+$ , 639.2966; found, 639.2969. That is the HRMS spectra of intermediates **7n** (SI, Figure S87); HRMS (TOF ES<sup>+</sup>):  $m/z$  calcd. for  $C_{40}H_{37}N_4O_4$   $[M+H]^+$ , 637.2809; found, 637.2812. Which is the HRMS spectra of intermediates **8n** (SI, Figure S88); HRMS (TOF ES<sup>+</sup>):  $m/z$  calcd. for  $C_{32}H_{26}N_3O_4$   $[M+H]^+$ , 516.1918; found, 516.1914. Which is the HRMS spectra of target compound **3n** (SI, Figure S89). In high-resolution mass spectrometry, the molecular ion peaks of intermediates **4n–8n**, and the target compound were detected. Based on the experimental results, we believe that the proposed reaction mechanism is reasonable.

### X-ray Structure and Data of 3n.

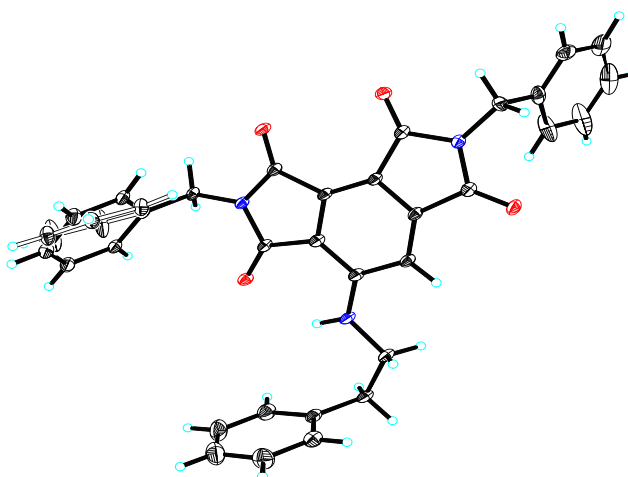

Figure S1. X-Ray crystal structure of **3n**

**Table S1.** Crystal data and structure refinement for **3n**

|                                   |                                                                                                          |
|-----------------------------------|----------------------------------------------------------------------------------------------------------|
| Identification code               | mo_230801B_0m                                                                                            |
| Empirical formula                 | C <sub>32</sub> H <sub>25</sub> N <sub>3</sub> O <sub>4</sub>                                            |
| Formula weight                    | 515.55                                                                                                   |
| Temperature                       | 100.00 K                                                                                                 |
| Wavelength                        | 0.71073 Å                                                                                                |
| Crystal system, space group       | monoclinic, P 1 21/n 1                                                                                   |
| Space group                       | P 1 21/n 1                                                                                               |
| Unit cell dimensions              | a = 10.1041 (6) Å    α = 90°.<br>b = 16.5967 (12) Å    β = 95.114 (2)°.<br>c = 30.366 (16) Å    γ = 90°. |
| Volume                            | 5071.9(6) Å <sup>3</sup>                                                                                 |
| Z, Calculated density             | 8, 1.350 Mg/m <sup>3</sup>                                                                               |
| Density (calculated)              | 1.350 g/cm <sup>3</sup>                                                                                  |
| Absorption coefficient            | 0.090 mm <sup>-1</sup>                                                                                   |
| F(000)                            | 2160                                                                                                     |
| Theta range for data collection   | 2.08 to 28.36°.                                                                                          |
| Index ranges                      | -10 ≤ h ≤ 13, -22 ≤ k ≤ 22, -40 ≤ l ≤ 40                                                                 |
| Reflections collected / unique    | 147402 / 12653 [R(int) = 0.0852]                                                                         |
| Max. and min. transmission        | 0.7457 and 0.0.6851                                                                                      |
| Independent reflections           | 12653 [R(int) = 0.0852]                                                                                  |
| Refinement method                 | Full-matrix least-squares on F <sup>2</sup>                                                              |
| Data / restraints / parameters    | 12653 / 166 / 795                                                                                        |
| Goodness-of-fit on F <sup>2</sup> | 1.159                                                                                                    |
| Final R indexes [I ≥ 2σ(I)]       | R <sub>1</sub> = 0.0928, wR <sub>2</sub> = 0.1804                                                        |
| Final R indexes (all data)        | R <sub>1</sub> = 0.1241, wR <sub>2</sub> = 0.1931                                                        |
| Extinction coefficient            | n/a                                                                                                      |
| Largest diff. peak and hole       | 0.607 / -0.567 e.Å <sup>-3</sup>                                                                         |

**Table S2. Bond Lengths for 3n**

| Atom | Atom | Length/Å | Atom | Atom | Length/Å  |
|------|------|----------|------|------|-----------|
| O1   | C11  | 1.209(4) | O2   | C64  | 1.210(4)  |
| O3   | C63  | 1.219(4) | O4   | C8   | 1.212(4)  |
| N1   | C7   | 1.461(4) | N1   | C8   | 1.381(4)  |
| N1   | C11  | 1.408(4) | N2   | C24  | 1.463(4)  |
| N2   | C63  | 1.399(4) | N2   | C64  | 1.399(4)  |
| N3   | H3   | 0.88     | N3   | C14  | 1.349(4)  |
| N3   | C16  | 1.465(4) | C1   | H1   | 0.95      |
| C1   | C2   | 1.405(7) | C1   | C6   | 1.375(6)  |
| C2   | H2   | 0.95     | C2   | C3   | 1.383(9)  |
| C3   | H3A  | 0.95     | C3   | C4   | 1.385(9)  |
| C4   | H4   | 0.95     | C4   | C5   | 1.382(6)  |
| C5   | H5   | 0.95     | C5   | C6   | 1.392(6)  |
| C6   | C7   | 1.513(5) | C7   | H7A  | 0.99      |
| C7   | H7B  | 0.99     | C8   | C9   | 1.490(4)  |
| C9   | C10  | 1.412(4) | C9   | C15  | 1.368(4)  |
| C10  | C11  | 1.489(5) | C10  | C12  | 1.377(4)  |
| C12  | C13  | 1.394(4) | C12  | C64  | 1.504(4)  |
| C13  | C14  | 1.408(4) | C13  | C63  | 1.467(4)  |
| C14  | C15  | 1.423(4) | C15  | H15  | 0.95      |
| C16  | H16A | 0.99     | C16  | H16B | 0.99      |
| C16  | C17  | 1.522(5) | C17  | H17A | 0.99      |
| C17  | H17B | 0.99     | C17  | C18  | 1.504(5)  |
| C18  | C19  | 1.400(5) | C18  | C23  | 1.390(5)  |
| C19  | H19  | 0.95     | C19  | C20  | 1.381(6)  |
| C20  | H20  | 0.95     | C20  | C21  | 1.385(7)  |
| C21  | H21  | 0.95     | C21  | C22  | 1.382(7)  |
| C22  | H22  | 0.95     | C22  | C23  | 1.388(6)  |
| C23  | H23  | 0.95     | C24  | H24A | 0.99      |
| C24  | H24B | 0.99     | C24  | C25  | 1.509(5)  |
| C25  | C26  | 1.457(6) | C25  | C26A | 1.303(10) |
| C25  | C30  | 1.348(6) | C25  | C30A | 1.462(10) |
| C26  | H26  | 0.95     | C26  | C27  | 1.396(7)  |
| C26A | H26A | 0.95     | C26A | C27A | 1.400(12) |
| C27  | H27  | 0.95     | C27  | C28  | 1.382(8)  |
| C27A | H27A | 0.95     | C27A | C28A | 1.391(13) |
| C28  | H28  | 0.95     | C28  | C29  | 1.372(9)  |
| C28A | H28A | 0.95     | C28A | C29A | 1.356(12) |
| C29  | H29  | 0.95     | C29  | C30  | 1.396(7)  |
| C29A | H29A | 0.95     | C29A | C30A | 1.392(11) |
| C30  | H30  | 0.95     | C30A | H30A | 0.95      |
| O5   | C41  | 1.217(4) | O6   | C38  | 1.206(4)  |

|      |      |           |      |      |          |
|------|------|-----------|------|------|----------|
| O7   | C46  | 1.211(4)  | O8   | C47  | 1.210(4) |
| N4   | C37  | 1.451(4)  | N4   | C38  | 1.413(4) |
| N4   | C41  | 1.381(4)  | N5   | C46  | 1.394(4) |
| N5   | C47  | 1.402(4)  | N5   | C48  | 1.459(4) |
| N6   | H6   | 0.88      | N6   | C43  | 1.347(4) |
| N6   | C55  | 1.464(4)  | C31  | H31  | 0.95     |
| C31  | C32  | 1.386(6)  | C31  | C36  | 1.377(5) |
| C32  | H32  | 0.95      | C32  | C33  | 1.371(7) |
| C33  | H33  | 0.95      | C33  | C34  | 1.360(7) |
| C34  | H34  | 0.95      | C34  | C35  | 1.392(6) |
| C35  | H35  | 0.95      | C35  | C36  | 1.385(5) |
| C36  | C37  | 1.515(5)  | C37  | H37A | 0.99     |
| C37  | H37B | 0.99      | C38  | C39  | 1.479(5) |
| C39  | C40  | 1.403(4)  | C39  | C45  | 1.385(4) |
| C40  | C41  | 1.494(4)  | C40  | C42  | 1.362(4) |
| C42  | H42  | 0.95      | C42  | C43  | 1.428(4) |
| C43  | C44  | 1.414(4)  | C44  | C45  | 1.388(4) |
| C44  | C47  | 1.478(4)  | C45  | C46  | 1.504(4) |
| C48  | H48A | 0.99      | C48  | H48B | 0.99     |
| C48  | C49  | 1.507(5)  | C49  | C50  | 1.397(6) |
| C49  | C50A | 1.357(11) | C49  | C54  | 1.362(6) |
| C49  | C54A | 1.498(11) | C50  | H50  | 0.95     |
| C50  | C51  | 1.388(7)  | C50A | H50A | 0.95     |
| C50A | C51A | 1.394(13) | C51  | H51  | 0.95     |
| C51  | C52  | 1.362(7)  | C51A | H51A | 0.95     |
| C52  | C53  | 1.409(8)  | C52A | H52A | 0.95     |
| C52A | C53A | 1.377(14) | C53  | H53  | 0.95     |
| C53  | C54  | 1.391(7)  | C53A | H53A | 0.95     |
| C53A | C54A | 1.392(14) | C54  | H54  | 0.95     |
| C54A | H54A | 0.95      | C55  | H55A | 0.99     |
| C55  | H55B | 0.99      | C55  | C56  | 1.521(5) |
| C56  | H56A | 0.99      | C56  | H56B | 0.99     |
| C56  | C57  | 1.509(5)  | C57  | C58  | 1.389(5) |
| C57  | C62  | 1.399(5)  | C58  | H58  | 0.95     |
| C58  | C59  | 1.389(5)  | C59  | H59  | 0.95     |
| C59  | C61  | 1.387(5)  | C60  | H60  | 0.95     |
| C60  | C61  | 1.381(6)  | C60  | C62  | 1.384(5) |
| C61  | H61  | 0.95      | C62  | H62  | 0.95     |

---

**Table S3.** Bond Angles for **3n**

| Atom | Atom | Atom | Angle/°  | Atom | Atom | Atom | Angle/°  |
|------|------|------|----------|------|------|------|----------|
| C8   | N1   | C7   | 123.6(3) | C8   | N1   | C11  | 112.5(3) |
| C11  | N1   | C7   | 123.3(3) | C63  | N2   | C24  | 123.7(3) |
| C64  | N2   | C24  | 124.6(3) | C64  | N2   | C63  | 111.6(2) |
| C14  | N3   | H3   | 118.2    | C14  | N3   | C16  | 123.5(3) |
| C16  | N3   | H3   | 118.2    | C2   | C1   | H1   | 119.8    |
| C6   | C1   | H1   | 119.8    | C6   | C1   | C2   | 120.4(5) |
| C1   | C2   | H2   | 119.6    | C3   | C2   | C1   | 120.7(5) |
| C3   | C2   | H2   | 119.6    | C2   | C3   | H3A  | 120.7    |
| C2   | C3   | C4   | 118.6(5) | C4   | C3   | H3A  | 120.7    |
| C3   | C4   | H4   | 119.7    | C5   | C4   | C3   | 120.6(6) |
| C5   | C4   | H4   | 119.7    | C4   | C5   | H5   | 119.4    |
| C4   | C5   | C6   | 121.2(5) | C6   | C5   | H5   | 119.4    |
| C1   | C6   | C5   | 118.4(4) | C1   | C6   | C7   | 118.4(4) |
| C5   | C6   | C7   | 123.1(4) | N1   | C7   | C6   | 114.5(3) |
| N1   | C7   | H7A  | 108.6    | N1   | C7   | H7B  | 108.6    |
| C6   | C7   | H7A  | 108.6    | C6   | C7   | H7B  | 108.6    |
| H7A  | C7   | H7B  | 107.6    | O4   | C8   | N1   | 125.6(3) |
| O4   | C8   | C9   | 128.2(3) | N1   | C8   | C9   | 106.2(3) |
| C10  | C9   | C8   | 107.8(3) | C15  | C9   | C8   | 127.1(3) |
| C15  | C9   | C10  | 124.9(3) | C9   | C10  | C11  | 107.6(3) |
| C12  | C10  | C9   | 116.9(3) | C12  | C10  | C11  | 135.1(3) |
| O1   | C11  | N1   | 124.3(3) | O1   | C11  | C10  | 130.1(3) |
| N1   | C11  | C10  | 105.7(3) | C10  | C12  | C13  | 119.6(3) |
| C10  | C12  | C64  | 132.9(3) | C13  | C12  | C64  | 107.5(3) |
| C12  | C13  | C14  | 123.6(3) | C12  | C13  | C63  | 108.6(3) |
| C14  | C13  | C63  | 127.7(3) | N3   | C14  | C13  | 120.9(3) |
| N3   | C14  | C15  | 122.3(3) | C13  | C14  | C15  | 116.7(3) |
| C9   | C15  | C14  | 118.2(3) | C9   | C15  | H15  | 120.9    |
| C14  | C15  | H15  | 120.9    | N3   | C16  | H16A | 109.8    |
| N3   | C16  | H16B | 109.8    | N3   | C16  | C17  | 109.4(3) |
| H16A | C16  | H16B | 108.2    | C17  | C16  | H16A | 109.8    |
| C17  | C16  | H16B | 109.8    | C16  | C17  | H17A | 109      |
| C16  | C17  | H17B | 109      | H17A | C17  | H17B | 107.8    |
| C18  | C17  | C16  | 112.9(3) | C18  | C17  | H17A | 109      |
| C18  | C17  | H17B | 109      | C19  | C18  | C17  | 119.4(3) |
| C23  | C18  | C17  | 122.1(3) | C23  | C18  | C19  | 118.4(4) |
| C18  | C19  | H19  | 119.6    | C20  | C19  | C18  | 120.8(4) |
| C20  | C19  | H19  | 119.6    | C19  | C20  | H20  | 119.9    |
| C19  | C20  | C21  | 120.2(4) | C21  | C20  | H20  | 119.9    |
| C20  | C21  | H21  | 120.1    | C22  | C21  | C20  | 119.7(4) |
| C22  | C21  | H21  | 120.1    | C21  | C22  | H22  | 119.9    |

|      |      |      |          |      |      |      |           |
|------|------|------|----------|------|------|------|-----------|
| C21  | C22  | C23  | 120.3(4) | C23  | C22  | H22  | 119.9     |
| C18  | C23  | H23  | 119.7    | C22  | C23  | C18  | 120.6(4)  |
| C22  | C23  | H23  | 119.7    | N2   | C24  | H24A | 109       |
| N2   | C24  | H24B | 109      | N2   | C24  | C25  | 113.0(3)  |
| H24A | C24  | H24B | 107.8    | C25  | C24  | H24A | 109       |
| C25  | C24  | H24B | 109      | C26  | C25  | C24  | 117.9(3)  |
| C26A | C25  | C24  | 124.4(6) | C26A | C25  | C30A | 119.1(7)  |
| C30  | C25  | C24  | 124.9(4) | C30  | C25  | C26  | 117.2(4)  |
| C30A | C25  | C24  | 115.1(5) | C25  | C26  | H26  | 120.2     |
| C27  | C26  | C25  | 119.6(5) | C27  | C26  | H26  | 120.2     |
| C25  | C26A | H26A | 119.3    | C25  | C26A | C27A | 121.4(10) |
| C27A | C26A | H26A | 119.3    | C26  | C27  | H27  | 119.9     |
| C28  | C27  | C26  | 120.2(5) | C28  | C27  | H27  | 119.9     |
| C26A | C27A | H27A | 119.8    | C28A | C27A | C26A | 120.4(10) |
| C28A | C27A | H27A | 119.8    | C27  | C28  | H28  | 119.9     |
| C29  | C28  | C27  | 120.2(5) | C29  | C28  | H28  | 119.9     |
| C27A | C28A | H28A | 120.2    | C29A | C28A | C27A | 119.5(10) |
| C29A | C28A | H28A | 120.2    | C28  | C29  | H29  | 120       |
| C28  | C29  | C30  | 119.9(6) | C30  | C29  | H29  | 120       |
| C28A | C29A | H29A | 119.8    | C28A | C29A | C30A | 120.4(9)  |
| C30A | C29A | H29A | 119.8    | C25  | C30  | C29  | 122.8(5)  |
| C25  | C30  | H30  | 118.6    | C29  | C30  | H30  | 118.6     |
| C25  | C30A | H30A | 120.6    | C29A | C30A | C25  | 118.7(8)  |
| C29A | C30A | H30A | 120.6    | O3   | C63  | N2   | 124.6(3)  |
| O3   | C63  | C13  | 128.7(3) | N2   | C63  | C13  | 106.6(3)  |
| O2   | C64  | N2   | 124.9(3) | O2   | C64  | C12  | 129.5(3)  |
| N2   | C64  | C12  | 105.6(3) | C38  | N4   | C37  | 123.6(3)  |
| C41  | N4   | C37  | 123.5(3) | C41  | N4   | C38  | 112.1(3)  |
| C46  | N5   | C47  | 111.9(2) | C46  | N5   | C48  | 124.7(3)  |
| C47  | N5   | C48  | 123.2(3) | C43  | N6   | H6   | 118.4     |
| C43  | N6   | C55  | 123.2(3) | C55  | N6   | H6   | 118.4     |
| C32  | C31  | H31  | 120.1    | C36  | C31  | H31  | 120.1     |
| C36  | C31  | C32  | 119.7(4) | C31  | C32  | H32  | 119.3     |
| C33  | C32  | C31  | 121.5(4) | C33  | C32  | H32  | 119.3     |
| C32  | C33  | H33  | 120.4    | C34  | C33  | C32  | 119.3(4)  |
| C34  | C33  | H33  | 120.4    | C33  | C34  | H34  | 120       |
| C33  | C34  | C35  | 119.9(4) | C35  | C34  | H34  | 120       |
| C34  | C35  | H35  | 119.5    | C36  | C35  | C34  | 121.0(4)  |
| C36  | C35  | H35  | 119.5    | C31  | C36  | C35  | 118.5(4)  |
| C31  | C36  | C37  | 123.2(3) | C35  | C36  | C37  | 118.2(3)  |
| N4   | C37  | C36  | 115.1(3) | N4   | C37  | H37A | 108.5     |
| N4   | C37  | H37B | 108.5    | C36  | C37  | H37A | 108.5     |
| C36  | C37  | H37B | 108.5    | H37A | C37  | H37B | 107.5     |

|      |      |      |           |      |      |      |          |
|------|------|------|-----------|------|------|------|----------|
| O6   | C38  | N4   | 123.5(3)  | O6   | C38  | C39  | 130.8(3) |
| N4   | C38  | C39  | 105.6(3)  | C40  | C39  | C38  | 108.3(3) |
| C45  | C39  | C38  | 134.9(3)  | C45  | C39  | C40  | 116.5(3) |
| C39  | C40  | C41  | 107.5(3)  | C42  | C40  | C39  | 125.8(3) |
| C42  | C40  | C41  | 126.6(3)  | O5   | C41  | N4   | 125.6(3) |
| O5   | C41  | C40  | 128.1(3)  | N4   | C41  | C40  | 106.3(3) |
| C40  | C42  | H42  | 121       | C40  | C42  | C43  | 118.0(3) |
| C43  | C42  | H42  | 121       | N6   | C43  | C42  | 122.4(3) |
| N6   | C43  | C44  | 121.4(3)  | C44  | C43  | C42  | 116.2(3) |
| C43  | C44  | C47  | 127.2(3)  | C45  | C44  | C43  | 123.8(3) |
| C45  | C44  | C47  | 108.9(3)  | C39  | C45  | C44  | 119.5(3) |
| C39  | C45  | C46  | 133.1(3)  | C44  | C45  | C46  | 107.4(3) |
| O7   | C46  | N5   | 125.0(3)  | O7   | C46  | C45  | 129.2(3) |
| N5   | C46  | C45  | 105.8(3)  | O8   | C47  | N5   | 125.4(3) |
| O8   | C47  | C44  | 128.7(3)  | N5   | C47  | C44  | 105.9(3) |
| N5   | C48  | H48A | 108.7     | N5   | C48  | H48B | 108.7    |
| N5   | C48  | C49  | 114.2(3)  | H48A | C48  | H48B | 107.6    |
| C49  | C48  | H48A | 108.7     | C49  | C48  | H48B | 108.7    |
| C50  | C49  | C48  | 120.2(4)  | C50A | C49  | C48  | 130.7(6) |
| C50A | C49  | C54A | 111.6(8)  | C54  | C49  | C48  | 118.2(4) |
| C54  | C49  | C50  | 120.9(4)  | C54A | C49  | C48  | 117.0(5) |
| C49  | C50  | H50  | 120.6     | C51  | C50  | C49  | 118.8(5) |
| C51  | C50  | H50  | 120.6     | C49  | C50A | H50A | 117.9    |
| C49  | C50A | C51A | 124.2(11) | C51A | C50A | H50A | 117.9    |
| C50  | C51  | H51  | 119.5     | C52  | C51  | C50  | 121.0(5) |
| C52  | C51  | H51  | 119.5     | C50A | C51A | H51A | 118.7    |
| C52A | C51A | C50A | 122.6(12) | C52A | C51A | H51A | 118.7    |
| C51  | C52  | H52  | 120.1     | C51  | C52  | C53  | 119.7(5) |
| C53  | C52  | H52  | 120.1     | C51A | C52A | H52A | 120.9    |
| C51A | C52A | C53A | 118.2(12) | C53A | C52A | H52A | 120.9    |
| C52  | C53  | H53  | 120.3     | C54  | C53  | C52  | 119.4(5) |
| C54  | C53  | H53  | 120.3     | C52A | C53A | H53A | 120.3    |
| C52A | C53A | C54A | 119.5(12) | C54A | C53A | H53A | 120.3    |
| C49  | C54  | C53  | 119.9(5)  | C49  | C54  | H54  | 120      |
| C53  | C54  | H54  | 120       | C49  | C54A | H54A | 118.5    |
| C53A | C54A | C49  | 122.9(10) | C53A | C54A | H54A | 118.5    |
| N6   | C55  | H55A | 109.8     | N6   | C55  | H55B | 109.8    |
| N6   | C55  | C56  | 109.4(3)  | H55A | C55  | H55B | 108.2    |
| C56  | C55  | H55A | 109.8     | C56  | C55  | H55B | 109.8    |
| C55  | C56  | H56A | 109.1     | C55  | C56  | H56B | 109.1    |
| H56A | C56  | H56B | 107.8     | C57  | C56  | C55  | 112.6(3) |
| C57  | C56  | H56A | 109.1     | C57  | C56  | H56B | 109.1    |
| C58  | C57  | C56  | 121.1(3)  | C58  | C57  | C62  | 118.6(3) |



|     |     |     |          |     |     |     |          |
|-----|-----|-----|----------|-----|-----|-----|----------|
| C62 | C57 | C56 | 120.3(3) | C57 | C58 | H58 | 119.8    |
| C57 | C58 | C59 | 120.4(3) | C59 | C58 | H58 | 119.8    |
| C58 | C59 | H59 | 120      | C61 | C59 | C58 | 120.0(4) |
| C61 | C59 | H59 | 120      | C61 | C60 | H60 | 120.3    |
| C61 | C60 | C62 | 119.4(4) | C62 | C60 | H60 | 120.3    |
| C59 | C61 | H61 | 119.8    | C60 | C61 | C59 | 120.4(4) |
| C60 | C61 | H61 | 119.8    | C57 | C62 | H62 | 119.4    |
| C60 | C62 | C57 | 121.1(3) | C60 | C62 | H62 | 119.4    |

---

YunNan University AVANCEHDIII 500M Y-1-a  
Apr16-2024-yangjiaming  
PROTON CDCl3

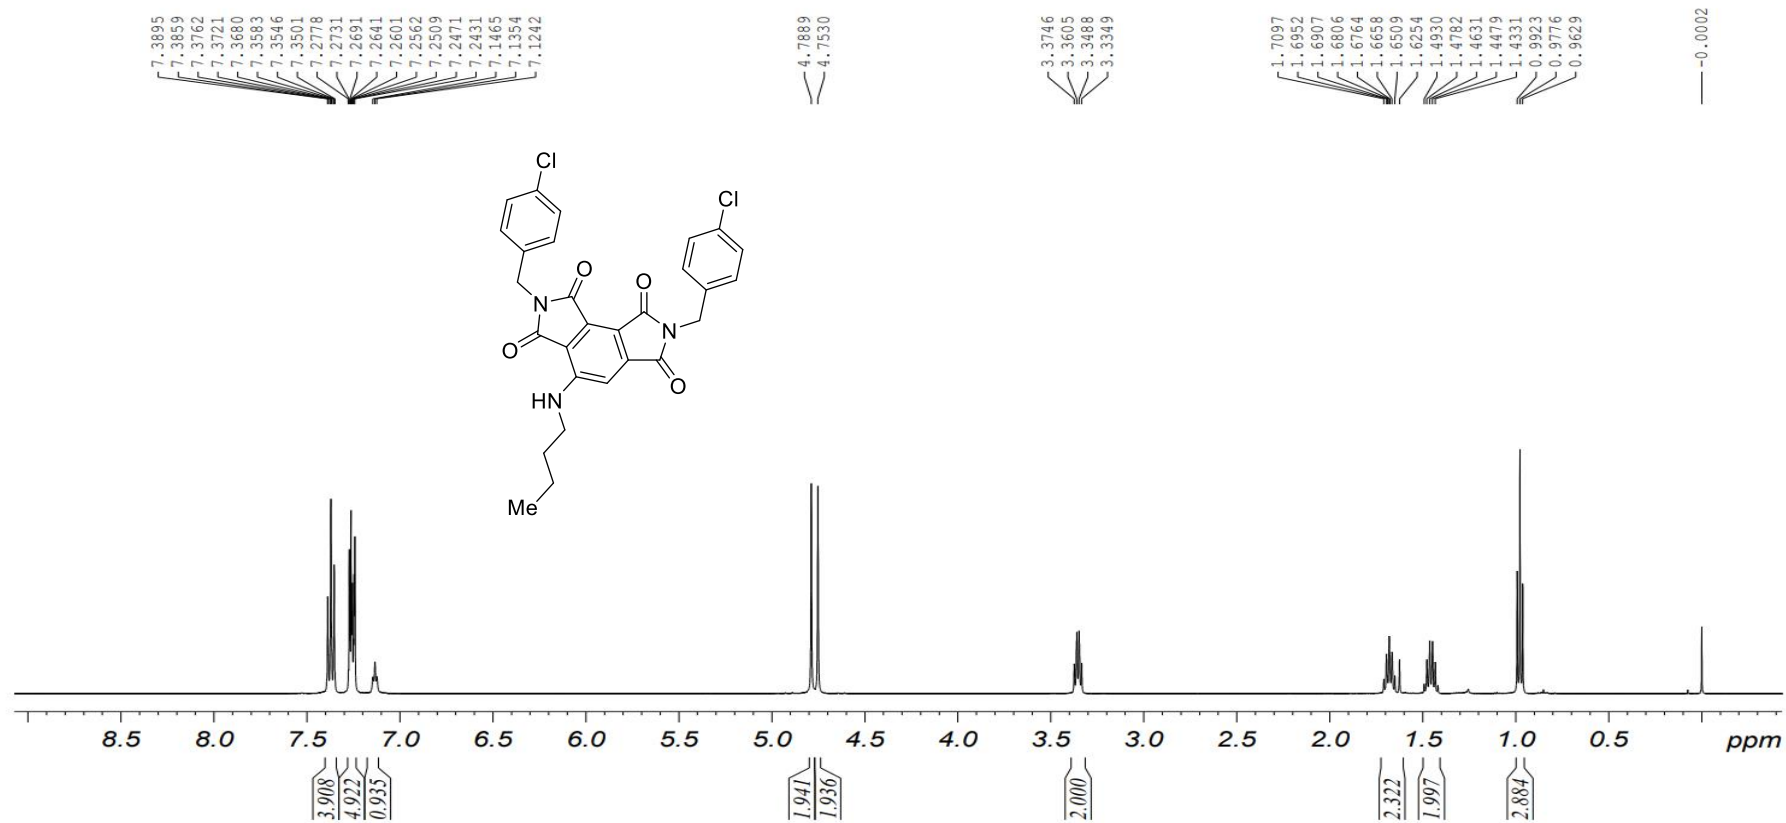

Figure S2. <sup>1</sup>H NMR (500 MHz, CDCl<sub>3</sub>) spectra of compound 3a

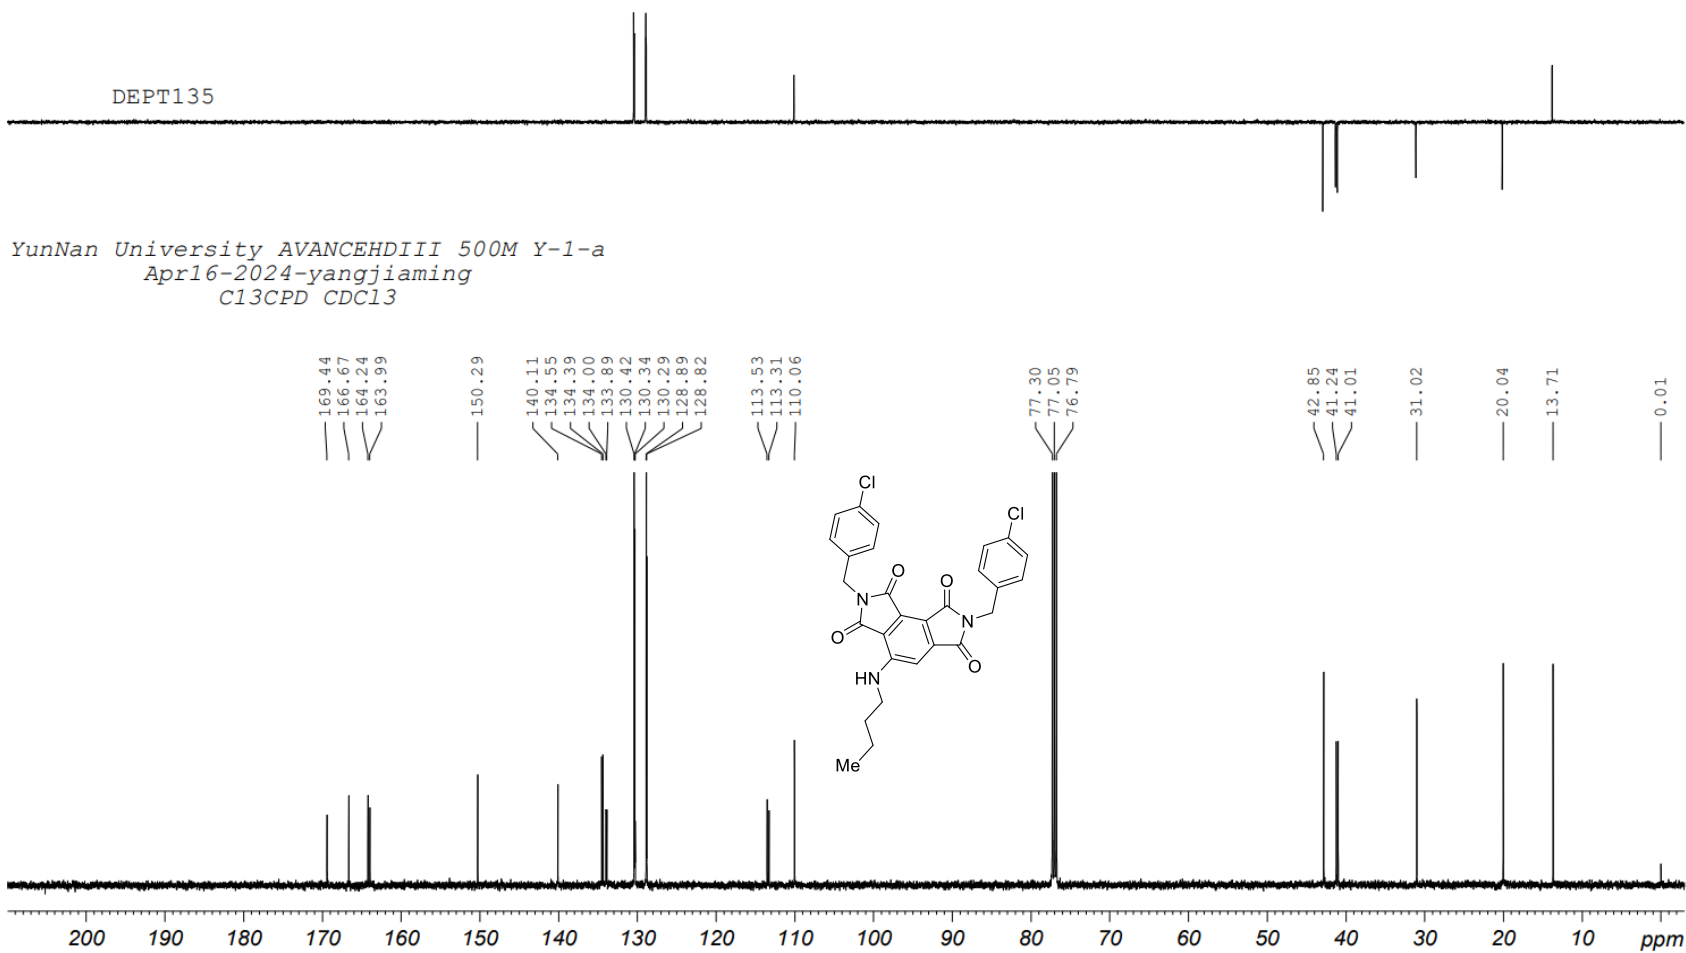

Figure S3.  $^{13}\text{C}$  NMR (125 MHz,  $\text{CDCl}_3$ ) spectra of compound **3a**

YunNan University AVANCEHDIII 500M Y-1-c  
Apr16-2024-yangjiaming  
PROTON CDCl3

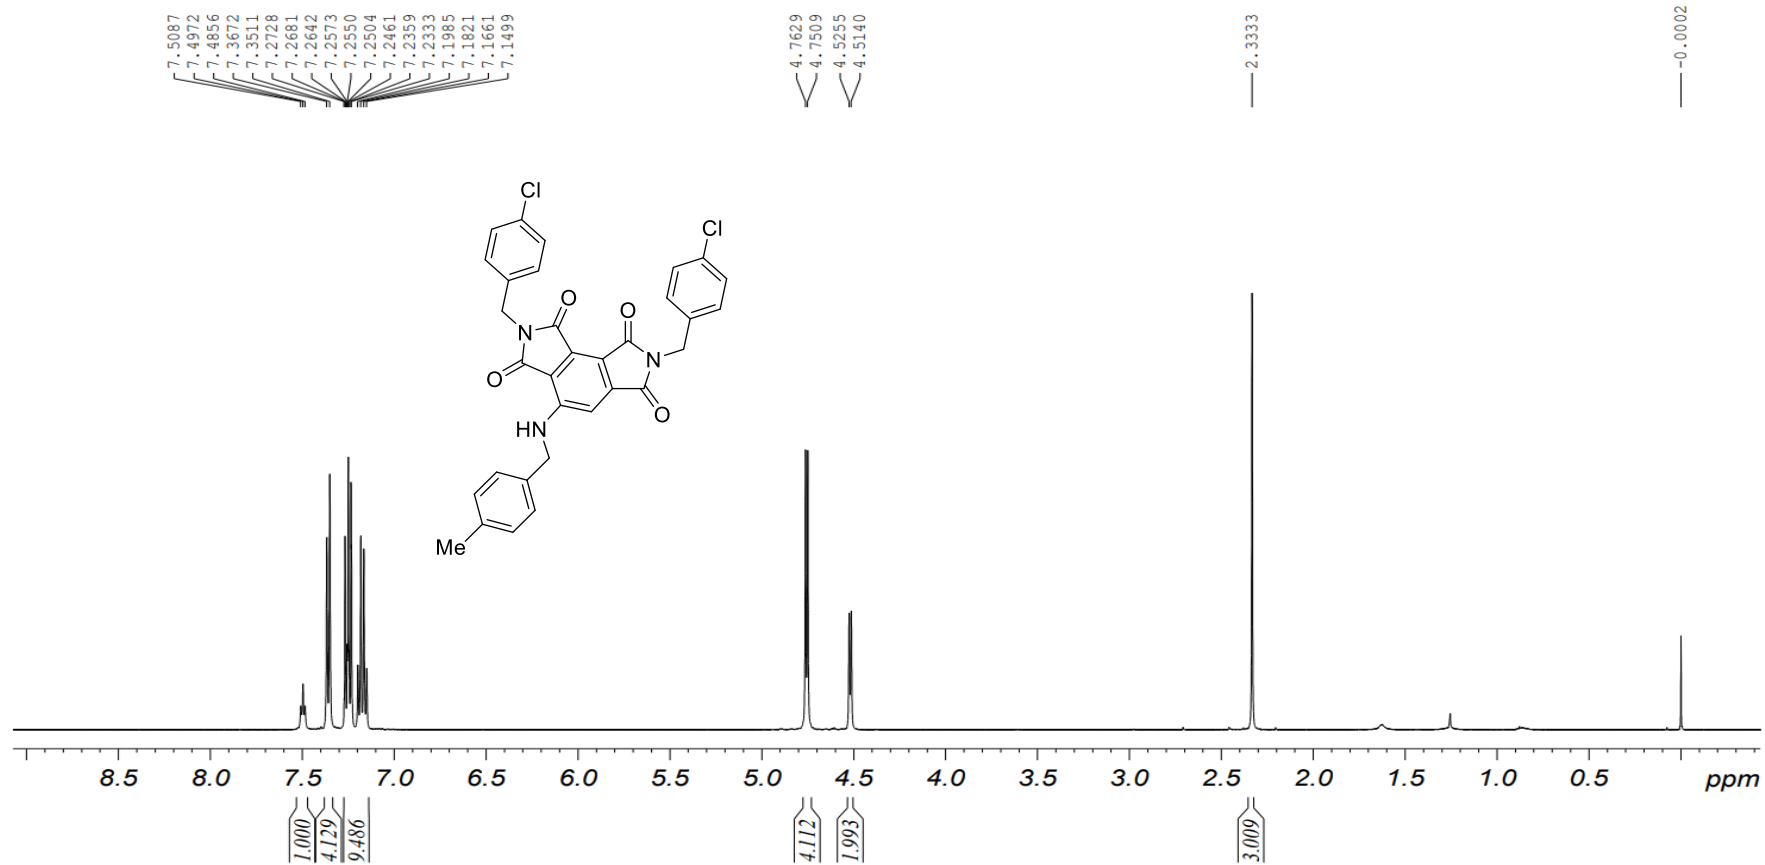

Figure S4. <sup>1</sup>H NMR (500 MHz, CDCl<sub>3</sub>) spectra of compound **3b**

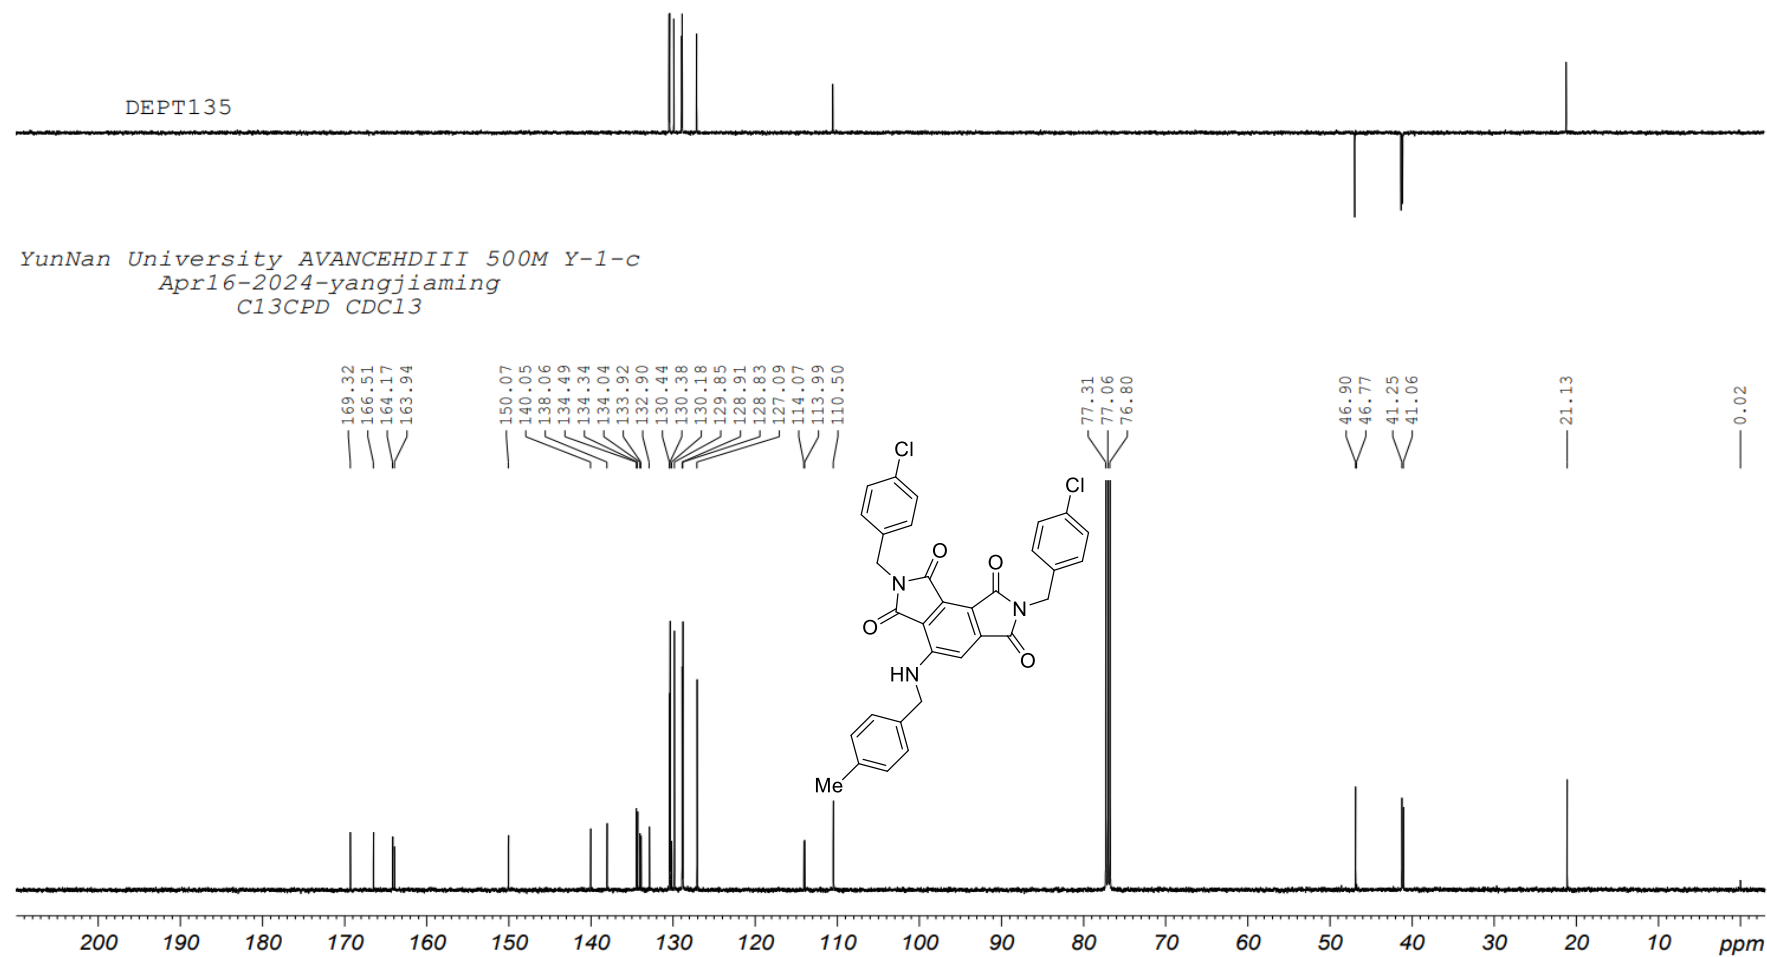

**Figure S5.** <sup>13</sup>C NMR (125 MHz, CDCl<sub>3</sub>) spectra of compound **3b**

YunNan University AVANCEHDIII 500M Y-1-d  
Apr16-2024-yangjiaming  
PROTON CDC13

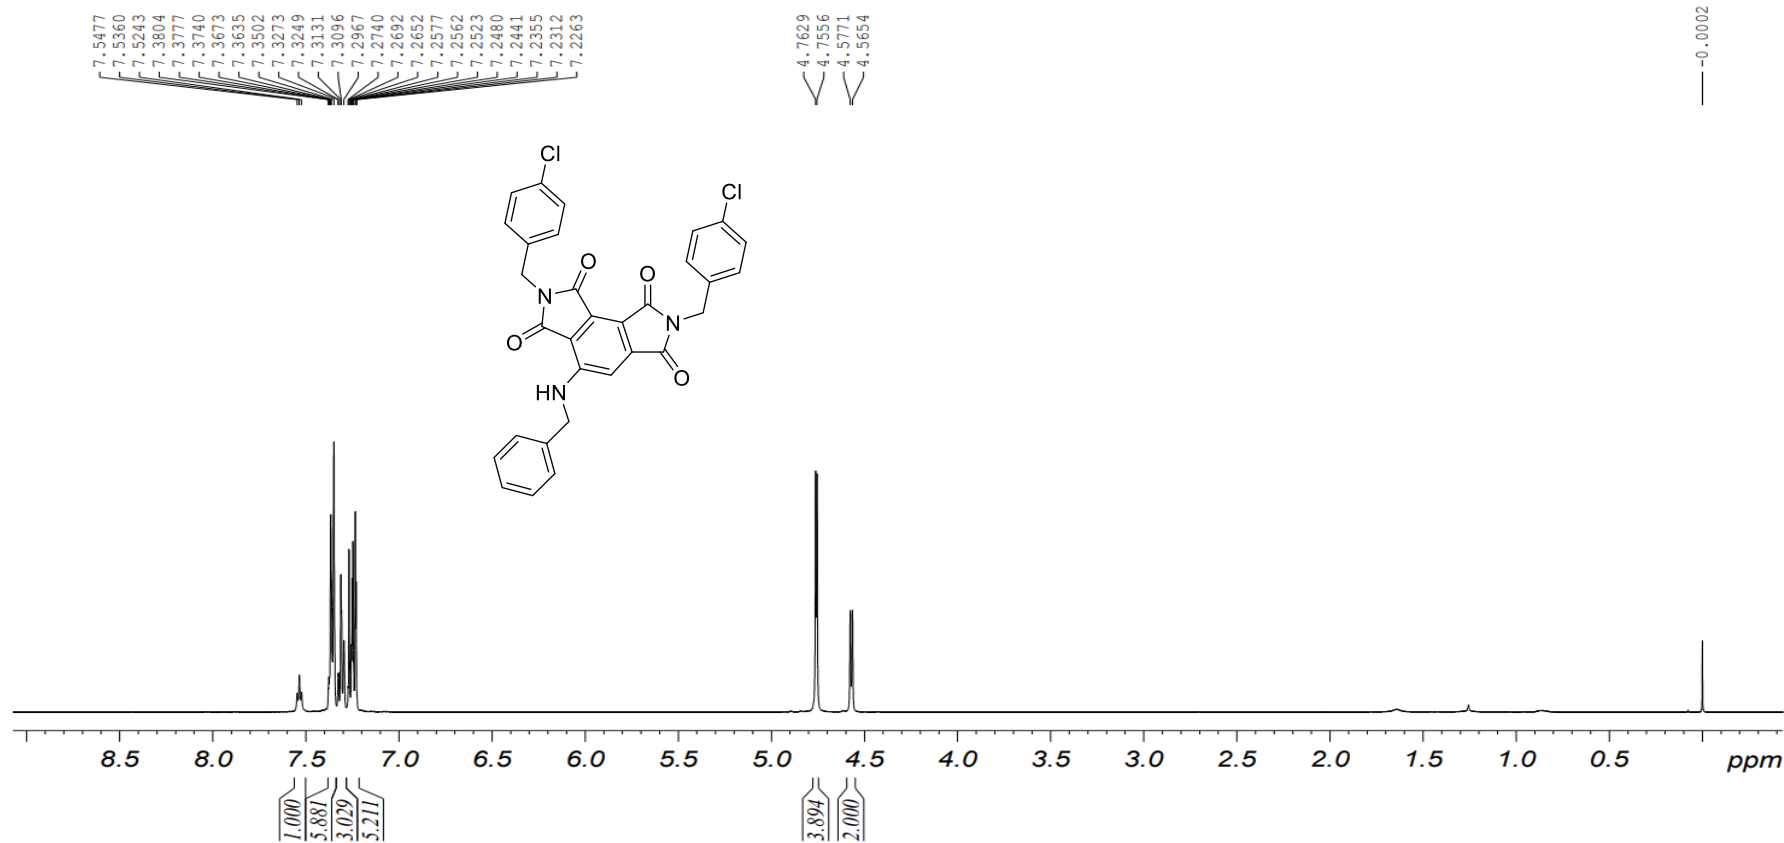

Figure S6.  $^1\text{H}$  NMR (500 MHz,  $\text{CDCl}_3$ ) spectra of compound **3c**

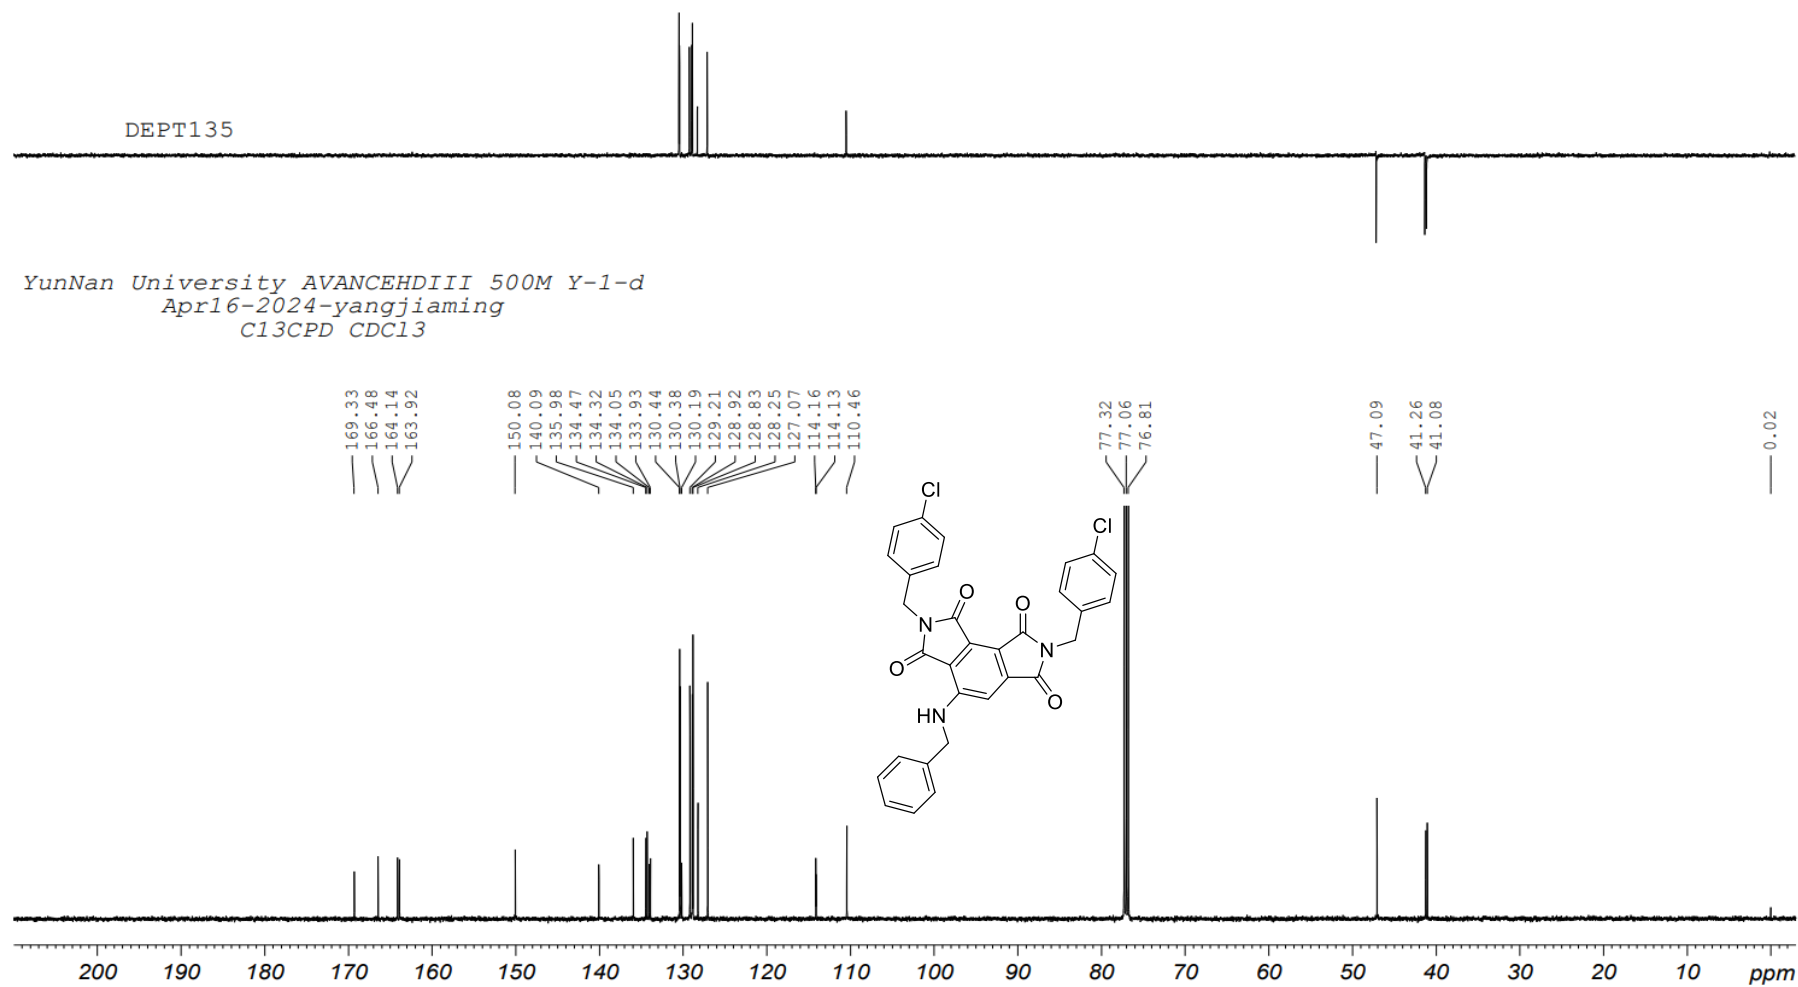

Figure S7.  $^{13}\text{C}$  NMR (125 MHz,  $\text{CDCl}_3$ ) spectra of compound 3c

YunNan University AVANCEHDIII 500M Y-1-e  
Apr16-2024-yangjiaming  
PROTON CDCl3

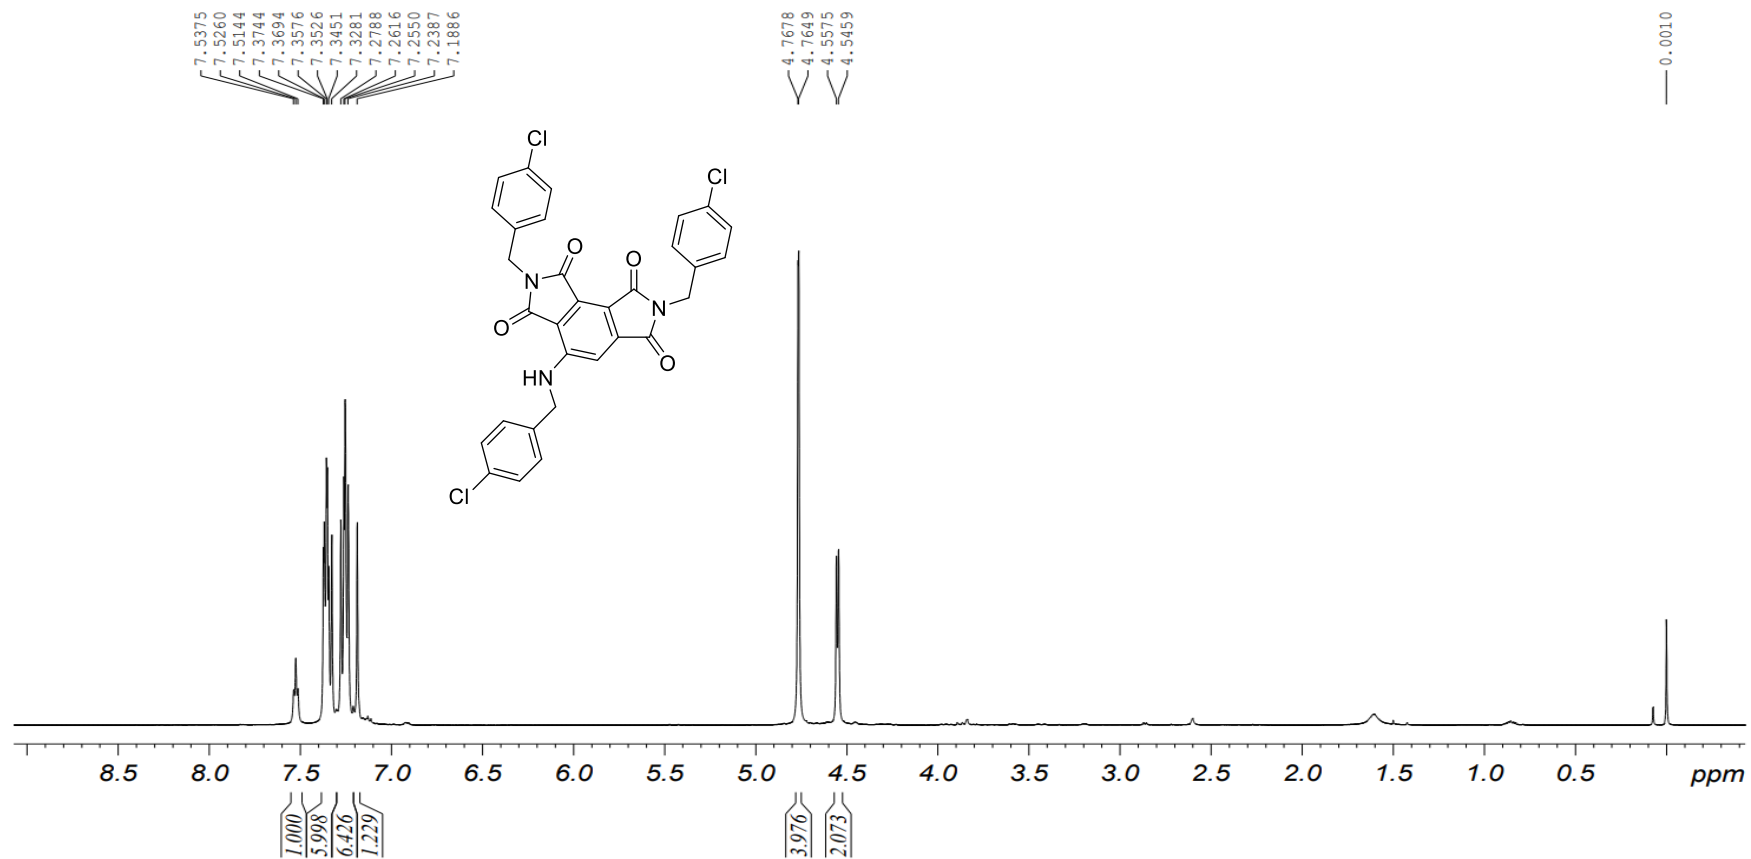

**Figure S8.** <sup>1</sup>H NMR (500 MHz, CDCl<sub>3</sub>) spectra of compound **3d**



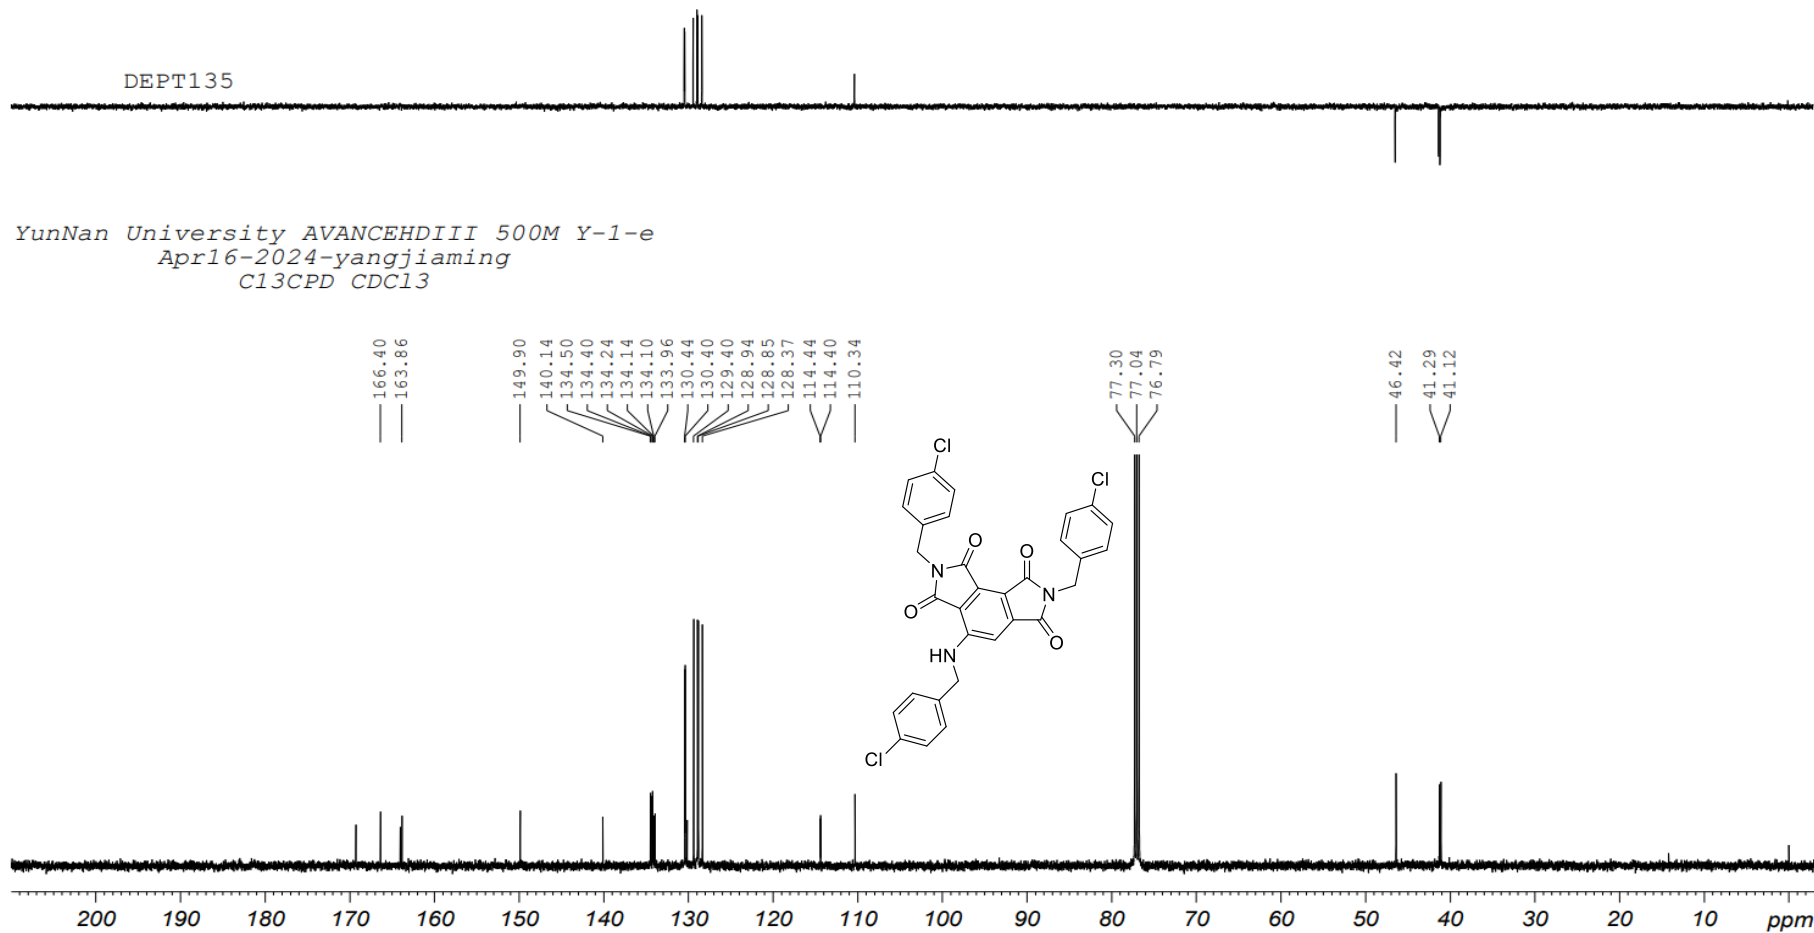

Figure S9.  $^{13}\text{C}$  NMR (125 MHz,  $\text{CDCl}_3$ ) spectra of compound **3d**

YUNNAN UNIVERSITY ASCEND AVIIIHD600 y-1-f  
Jun11-2024-yangjiaming  
PROTON CDCl3

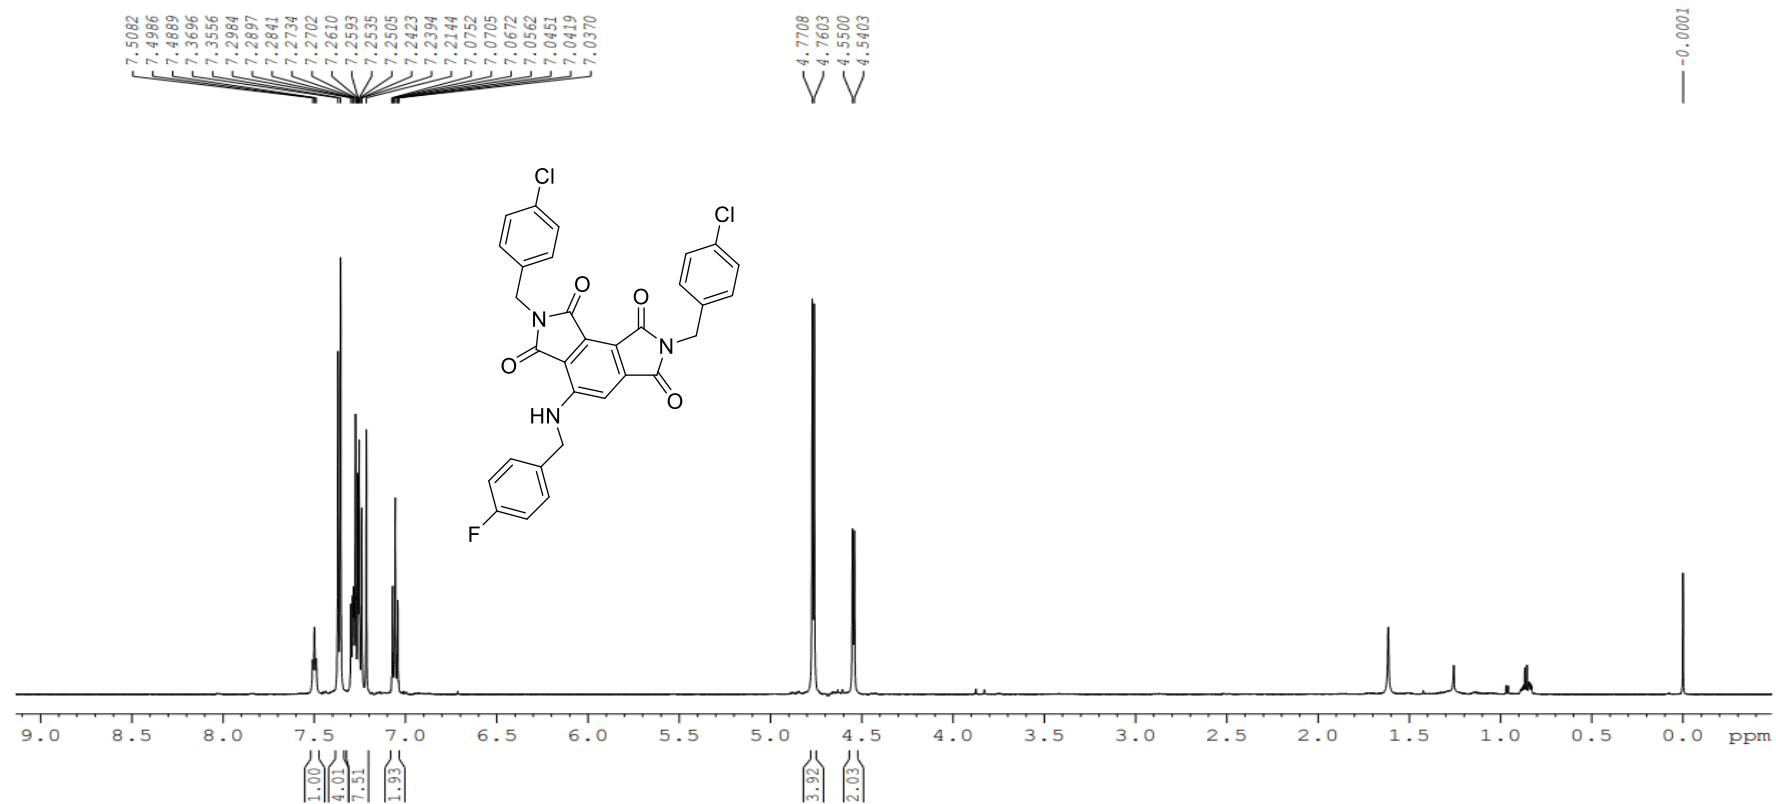

Figure S10.  $^1\text{H}$  NMR (600 MHz,  $\text{CDCl}_3$ ) spectra of compound **3e**

DEPT135

YUNNAN UNIVERSITY ASCEND AVIIIHD600 y-1-f  
Jun11-2024-yangjiaming  
C13CPD CDCl3

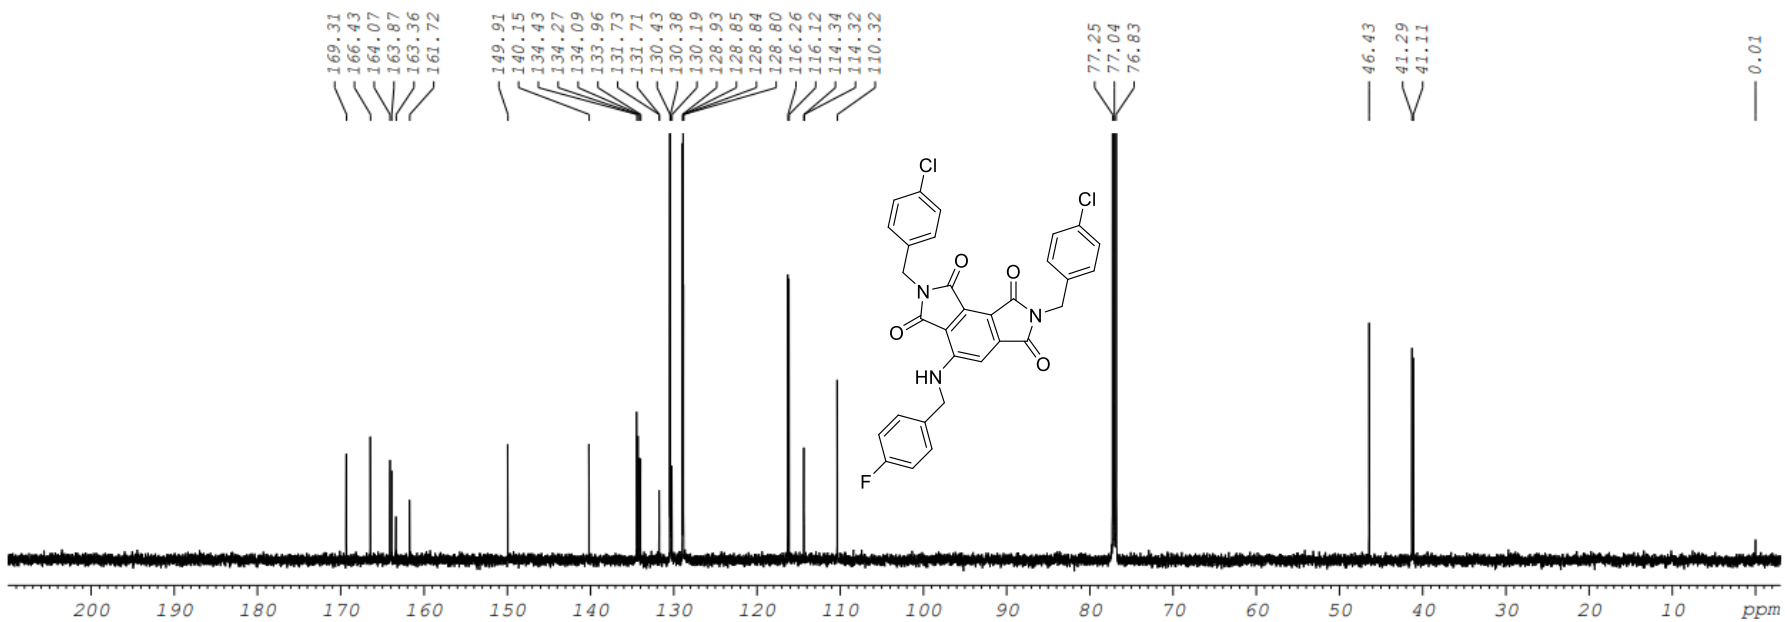

Figure S11.  $^{13}\text{C}$  NMR (150 MHz,  $\text{CDCl}_3$ ) spectra of compound **3e**

YUNNAN UNIVERSITY ASCEND AVIIIHD600 y-1-f  
Jun11-2024-yangjiaming  
F19CPD CDCl3

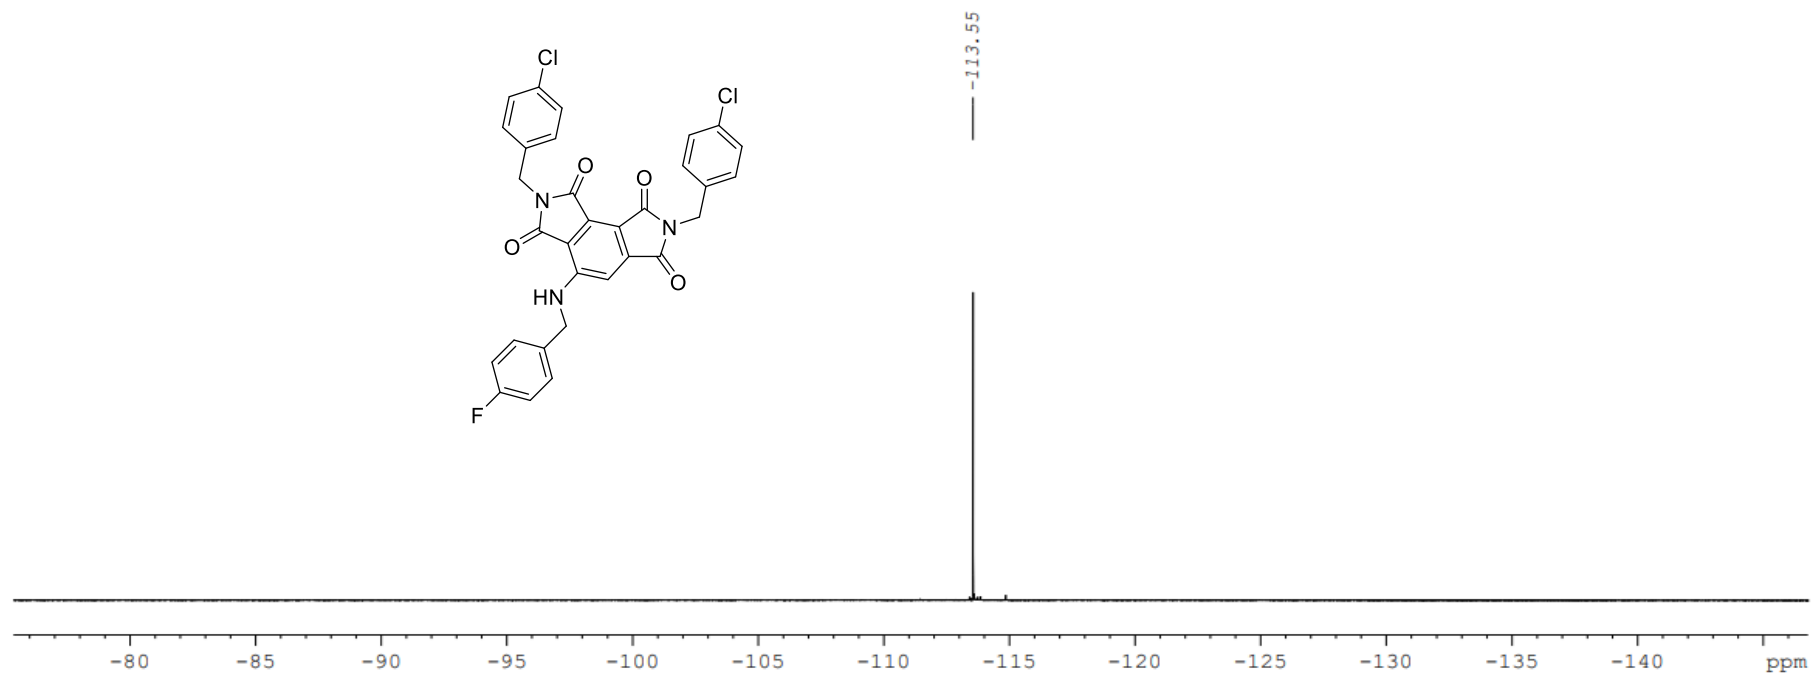

Figure S12.  $^{19}\text{F}$  NMR (564 MHz,  $\text{CDCl}_3$ ) spectra of compound 3e

YUNNAN UNIVERSITY ASCEND AVIIIHD600 y-1-32  
Sep01-2023-yangjiaming  
PROTON CDCl3

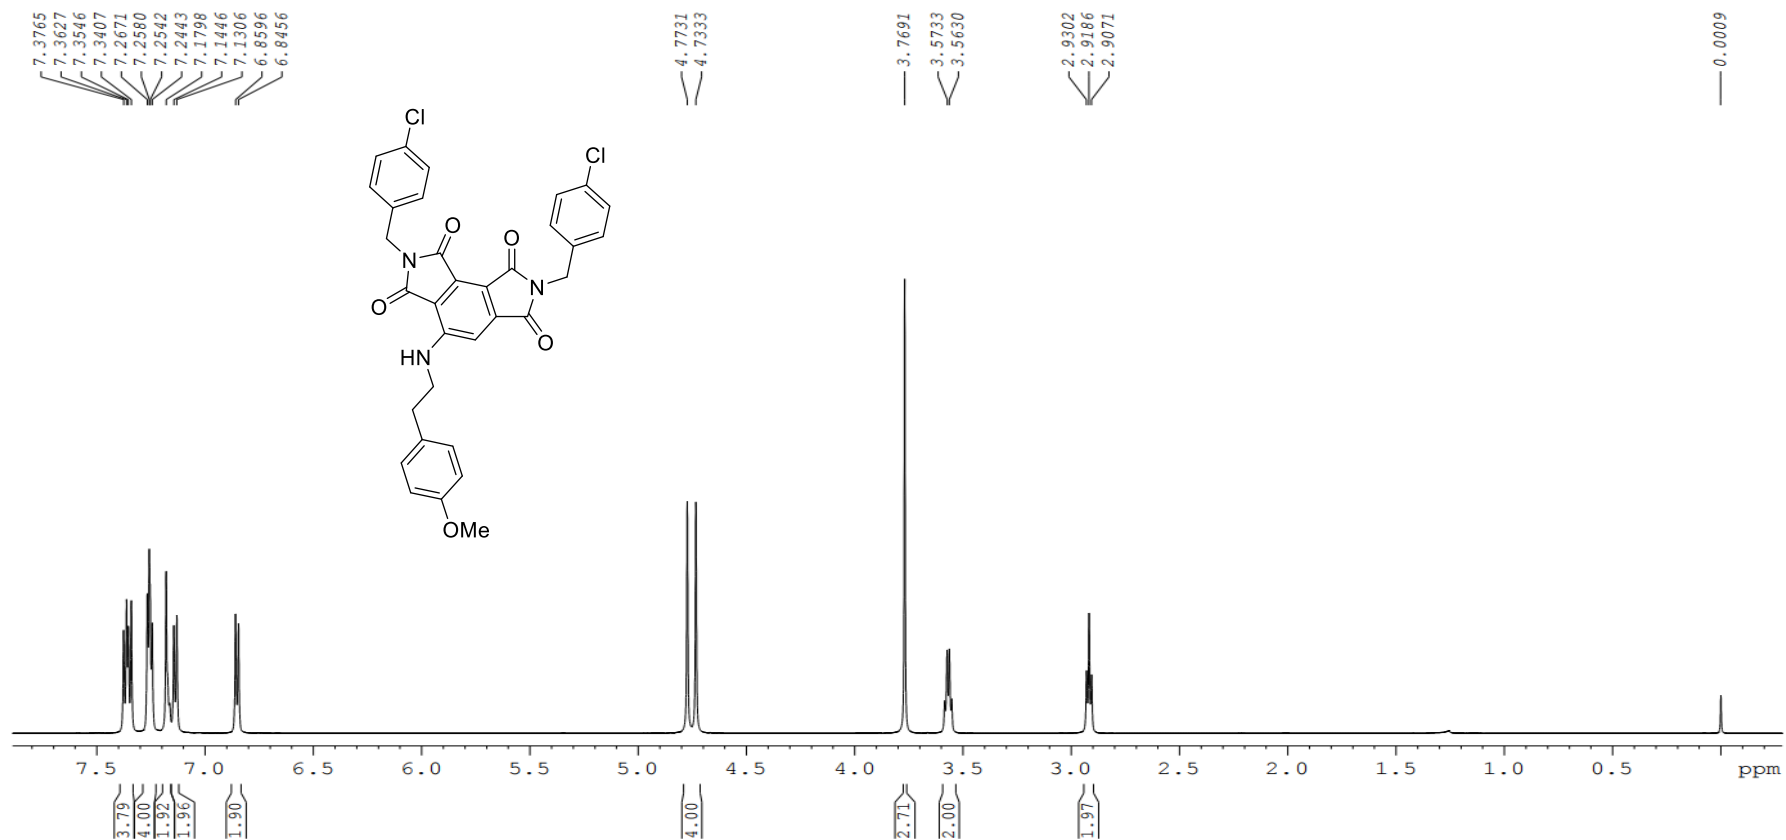

Figure S13. <sup>1</sup>H NMR (600 MHz, CDCl<sub>3</sub>) spectra of compound 3f

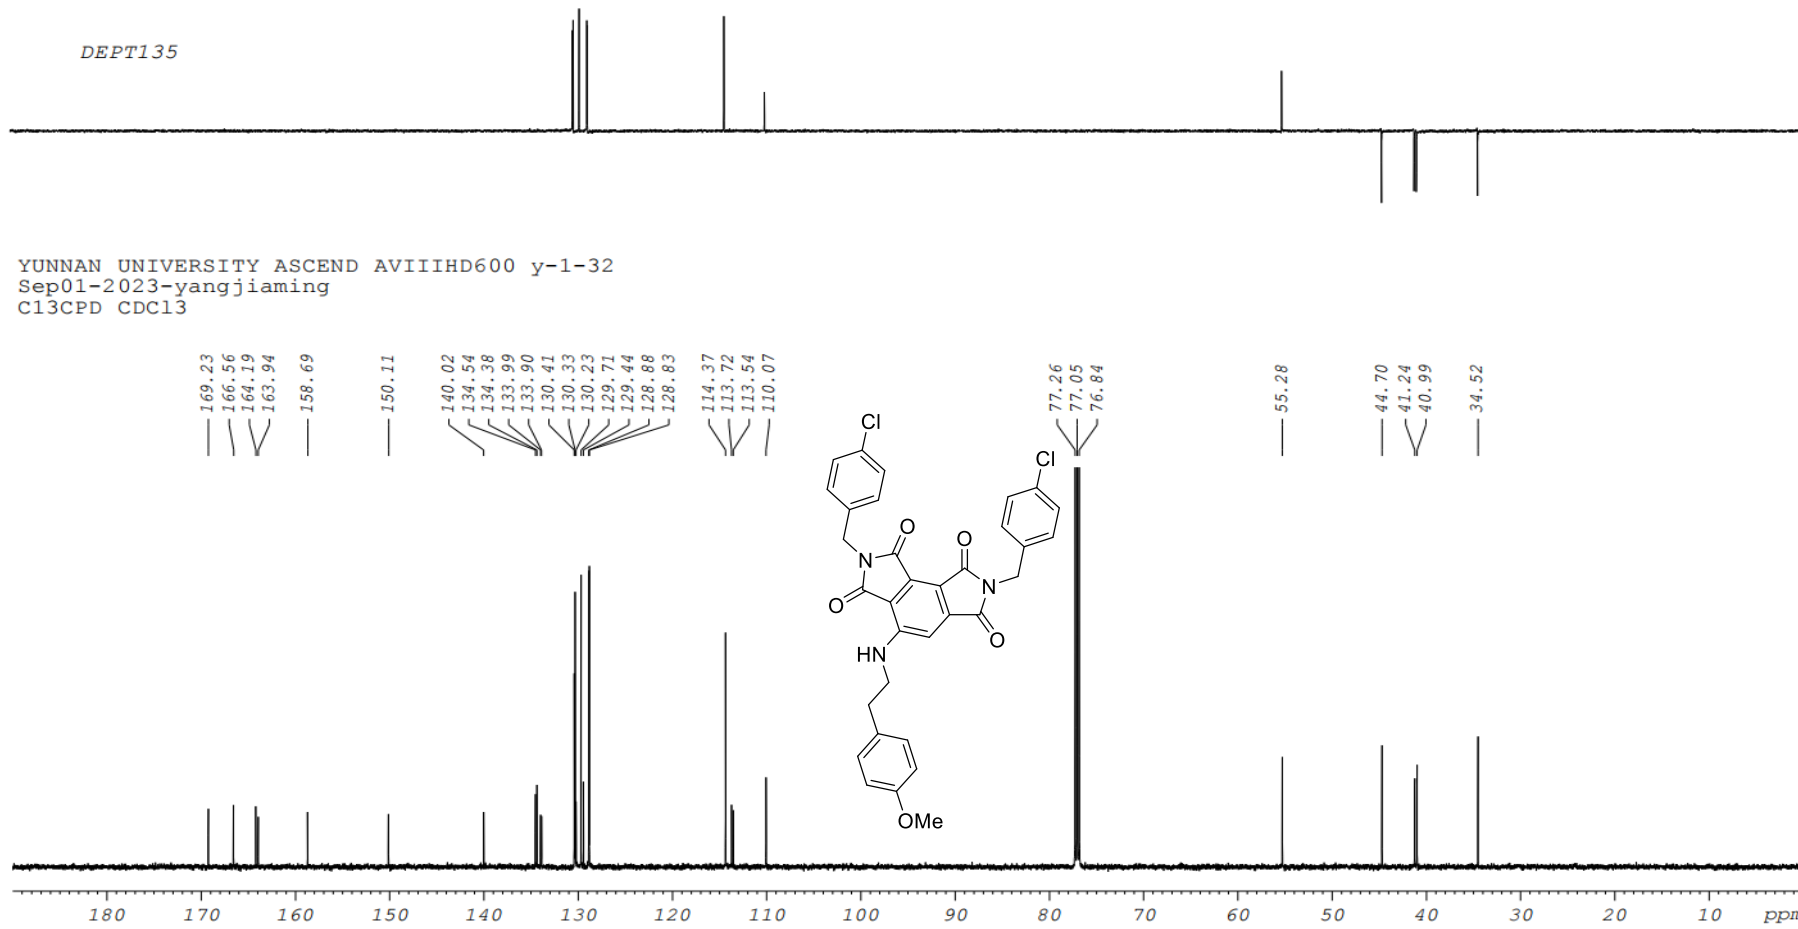

Figure S14. <sup>13</sup>C NMR (150 MHz, CDCl<sub>3</sub>) spectra of compound 3f

YunNan University AVANCEHDIII 500M y-1-30  
Aug23-2023-yangjiaming  
PROTON CDCl3

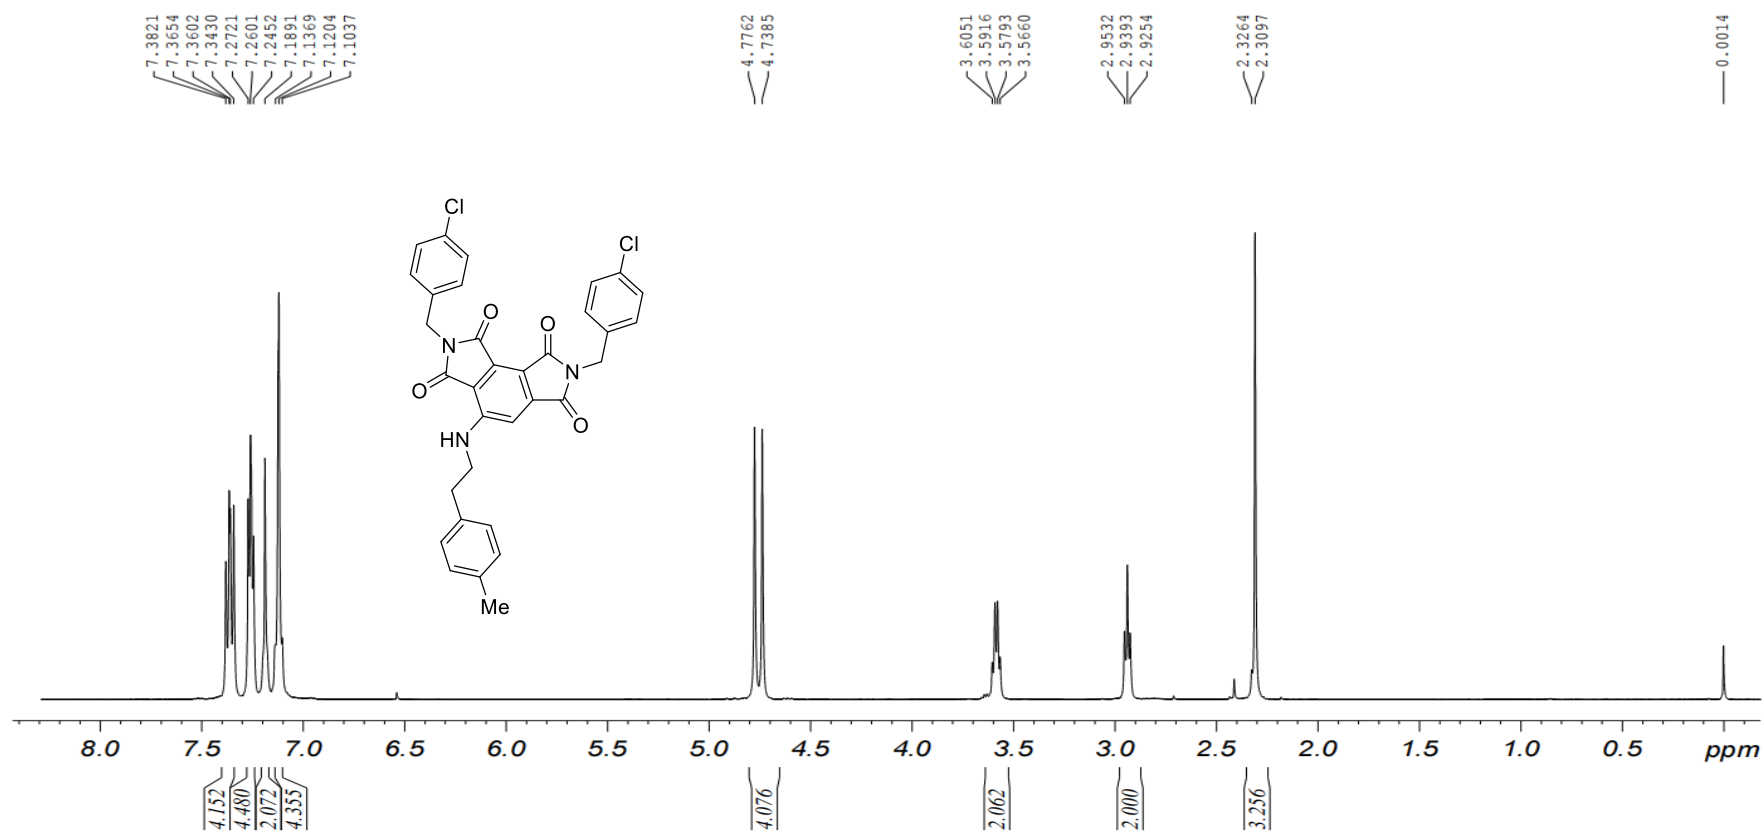

Figure S15. <sup>1</sup>H NMR (500 MHz, CDCl<sub>3</sub>) spectra of compound 3g

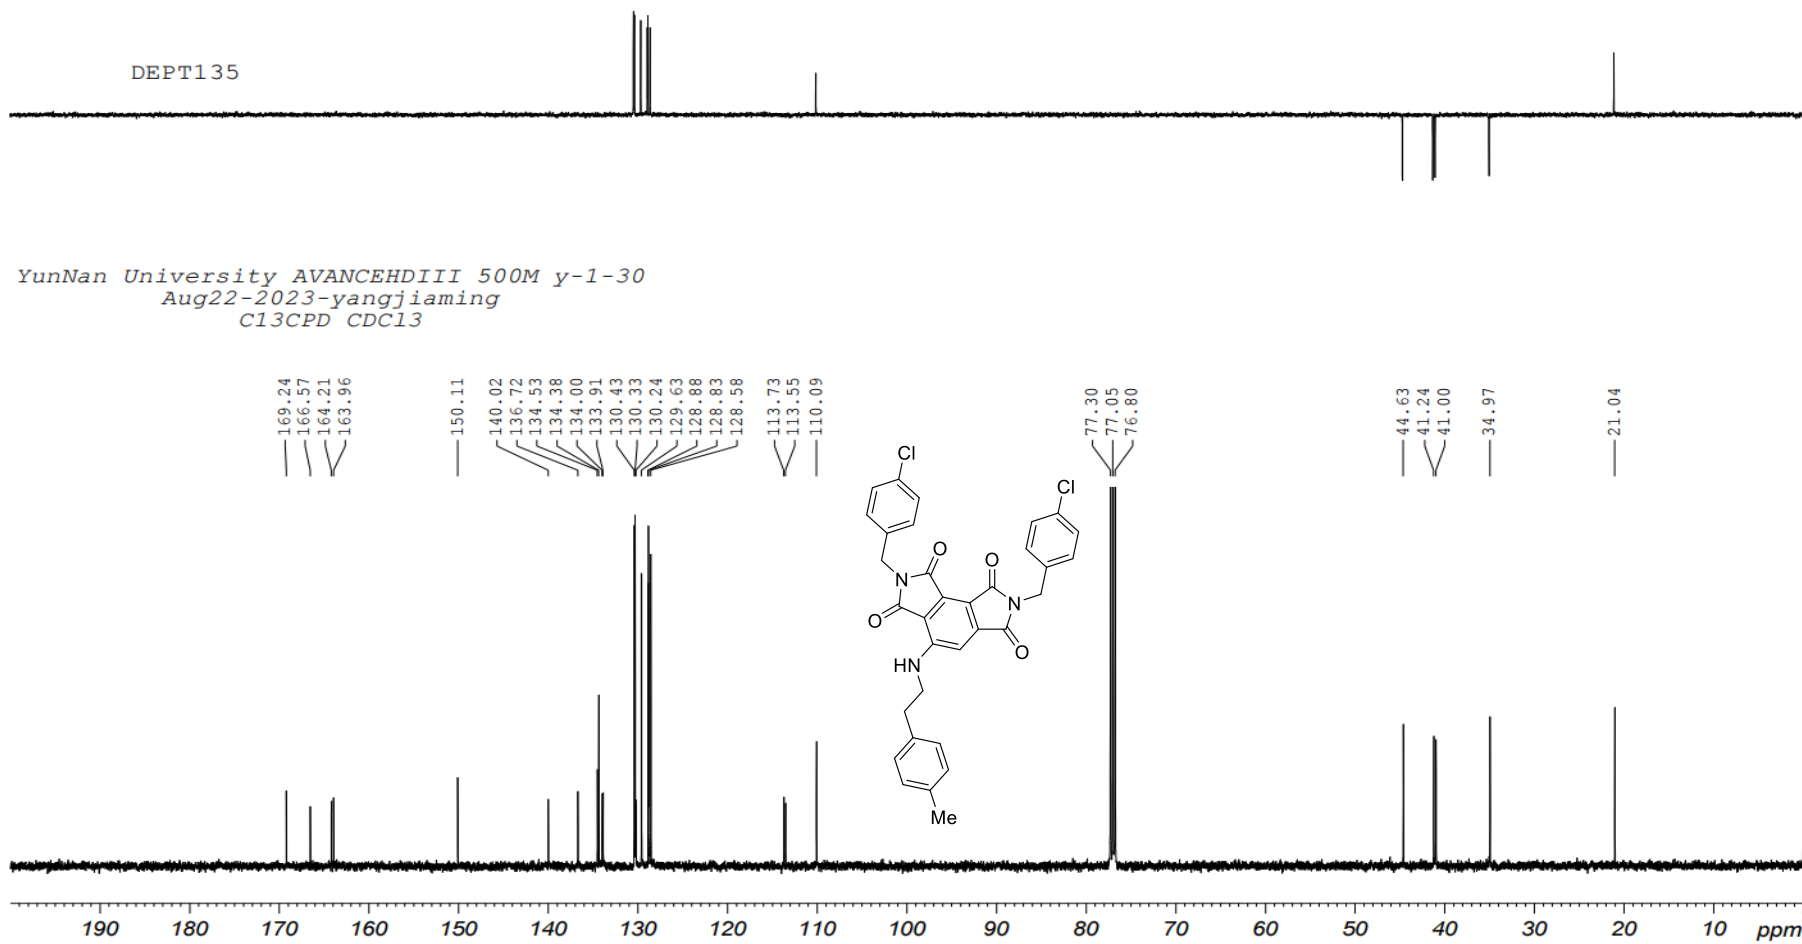

Figure S16. <sup>13</sup>C NMR (125 MHz, CDCl<sub>3</sub>) spectra of compound 3g



YunNan University AVANCEHDIII 500M  $\gamma$ -1-29  
Aug22-2023-yangjiaming  
PROTON CDCl<sub>3</sub>

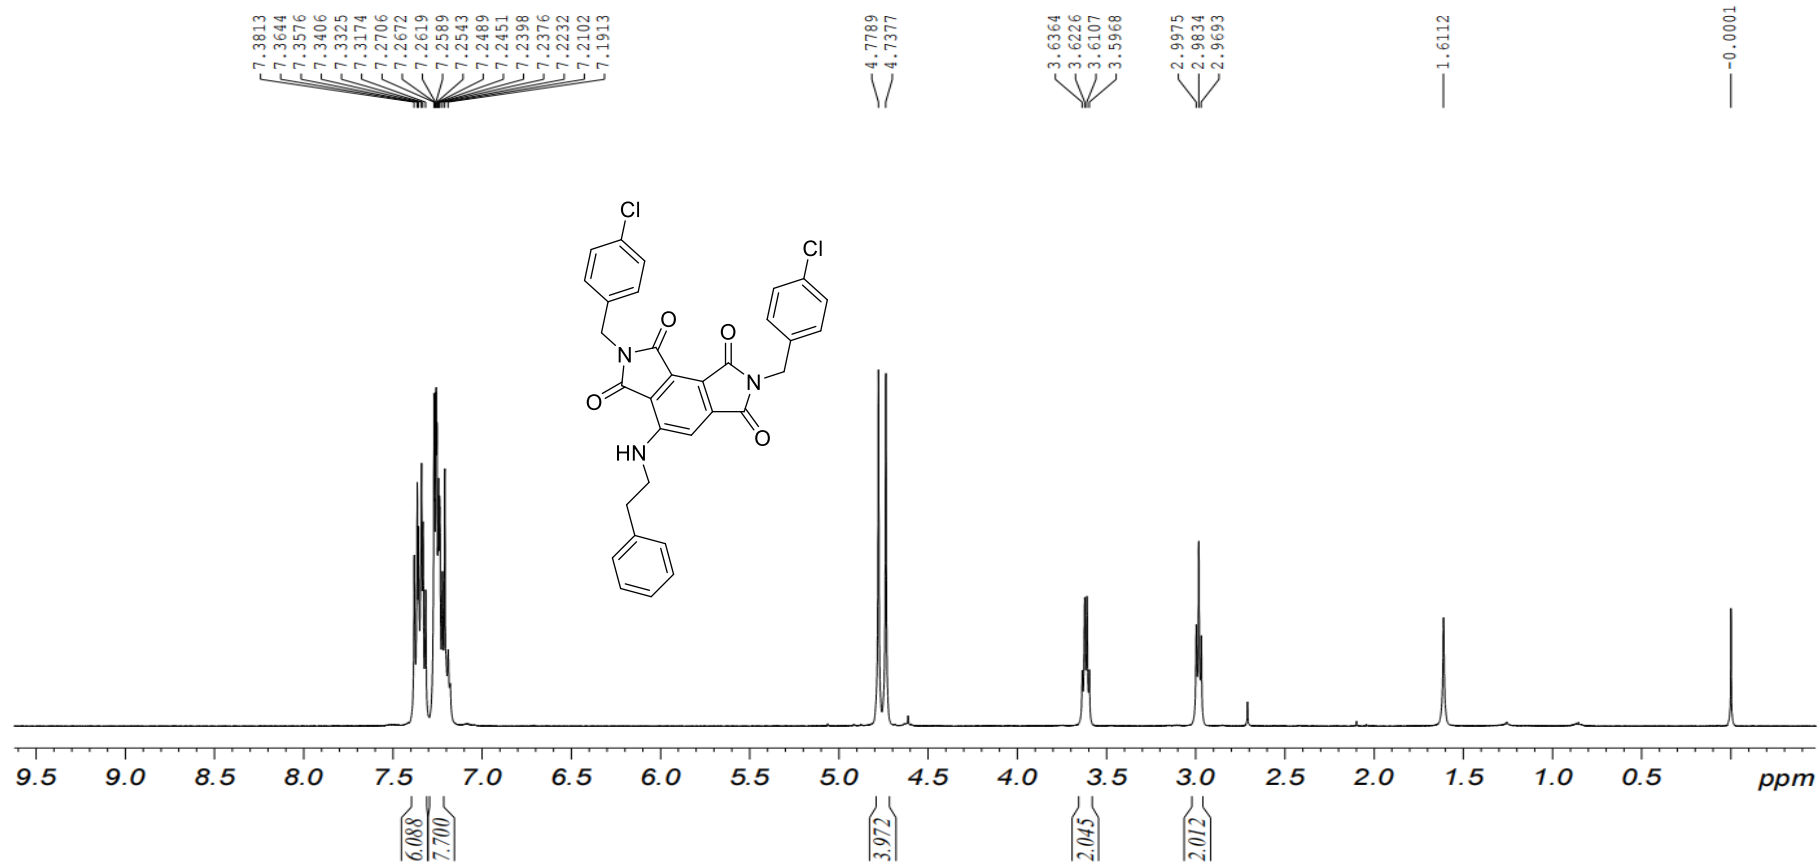

Figure S17. <sup>1</sup>H NMR (500 MHz, CDCl<sub>3</sub>) spectra of compound 3h

DEPT135

YunNan University AVANCEHDIII 500M y-1-29  
Aug22-2023-yangjiaming  
C13CPD CDC13

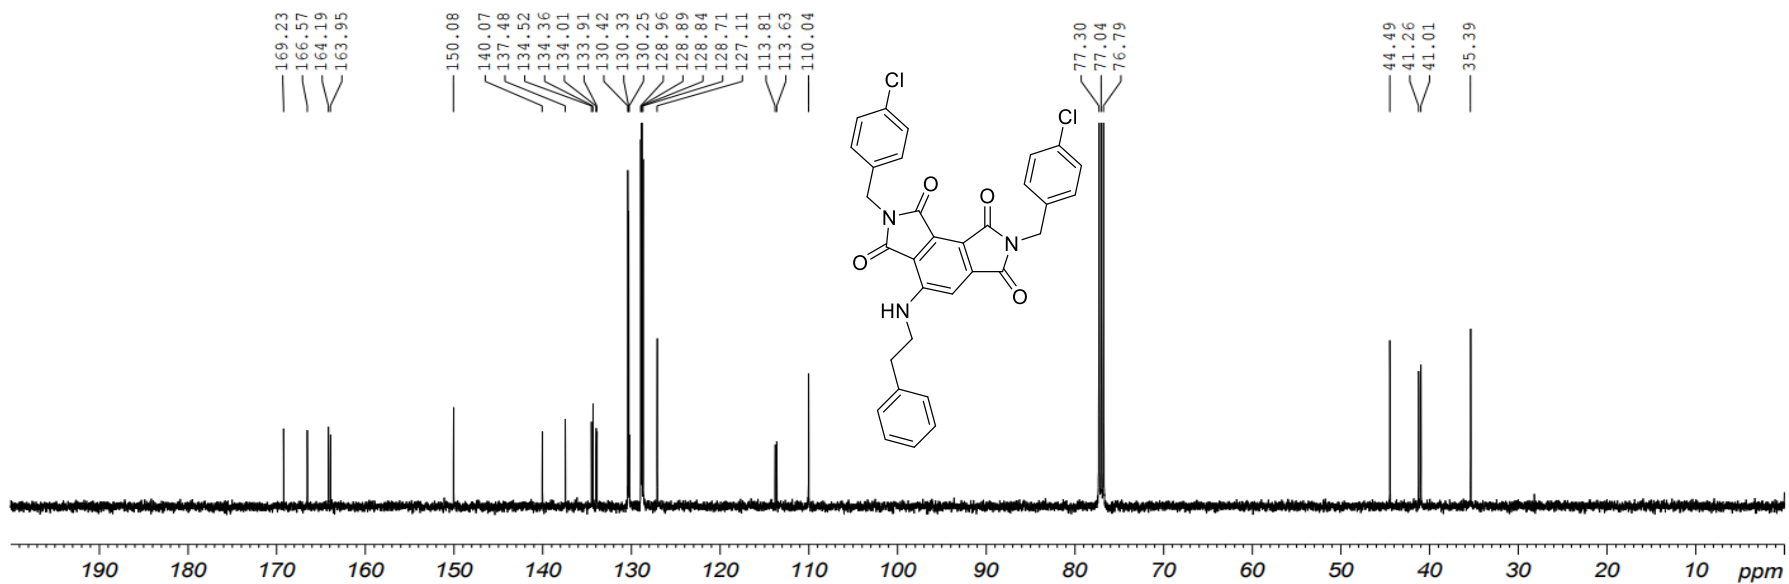

Figure S18. <sup>13</sup>C NMR (125 MHz, CDCl<sub>3</sub>) spectra of compound 3h

YunNan University AVANCEHDIII 500M y-1-28  
Aug23-2023-yangjiaming  
PROTON CDCl3

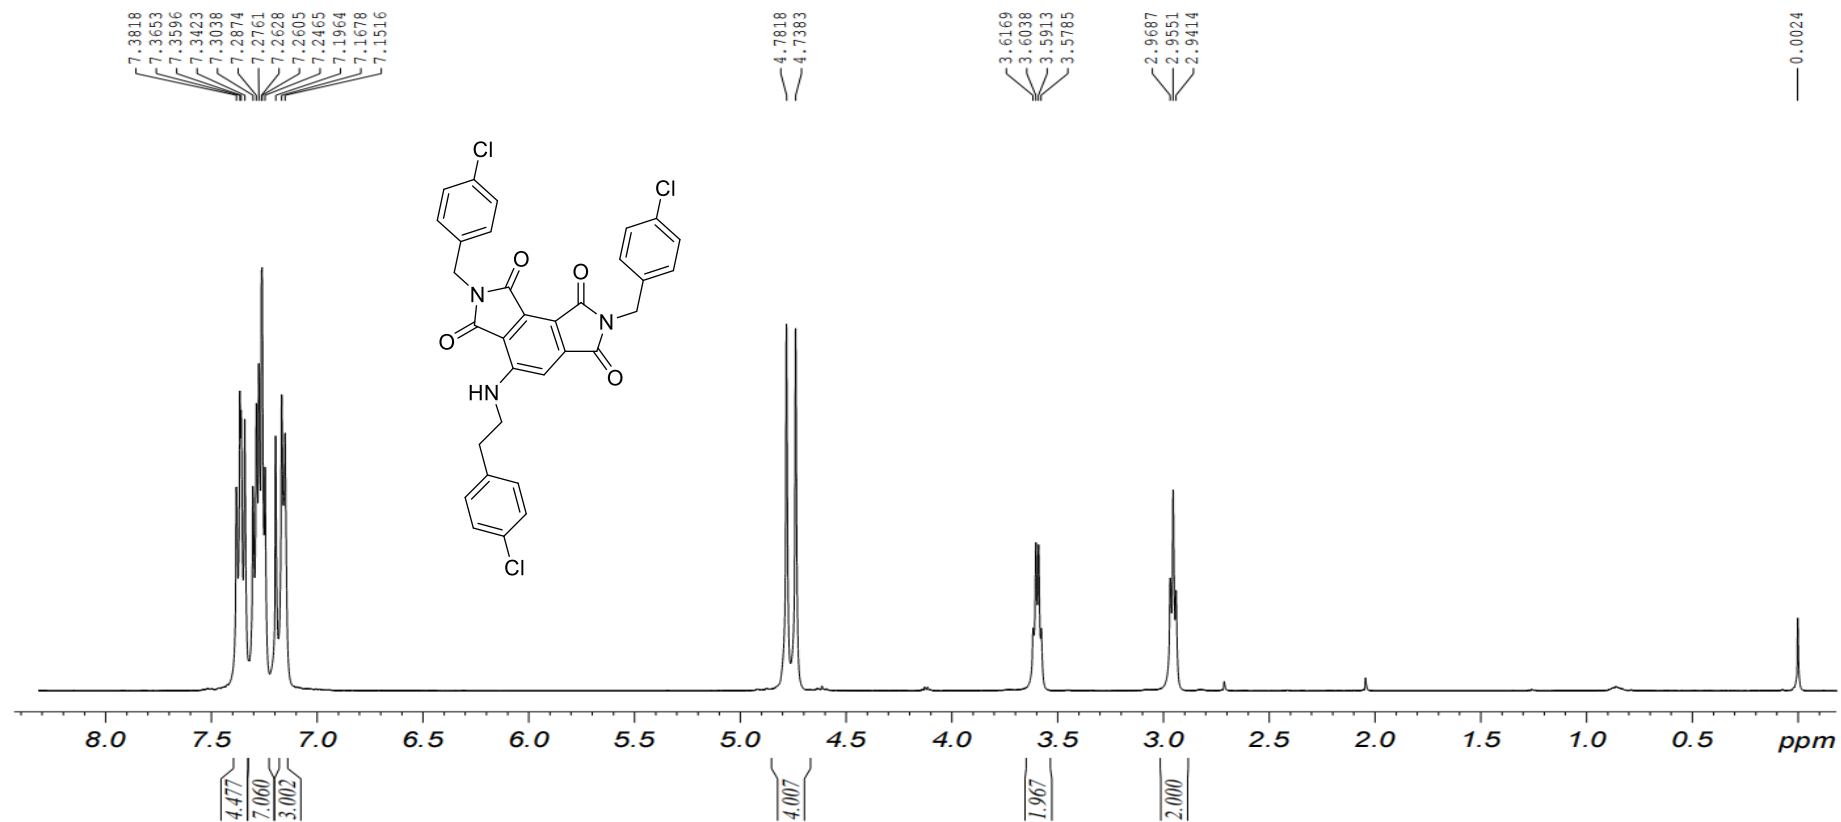

Figure S19.  $^1\text{H}$  NMR (500 MHz,  $\text{CDCl}_3$ ) spectra of compound 3i

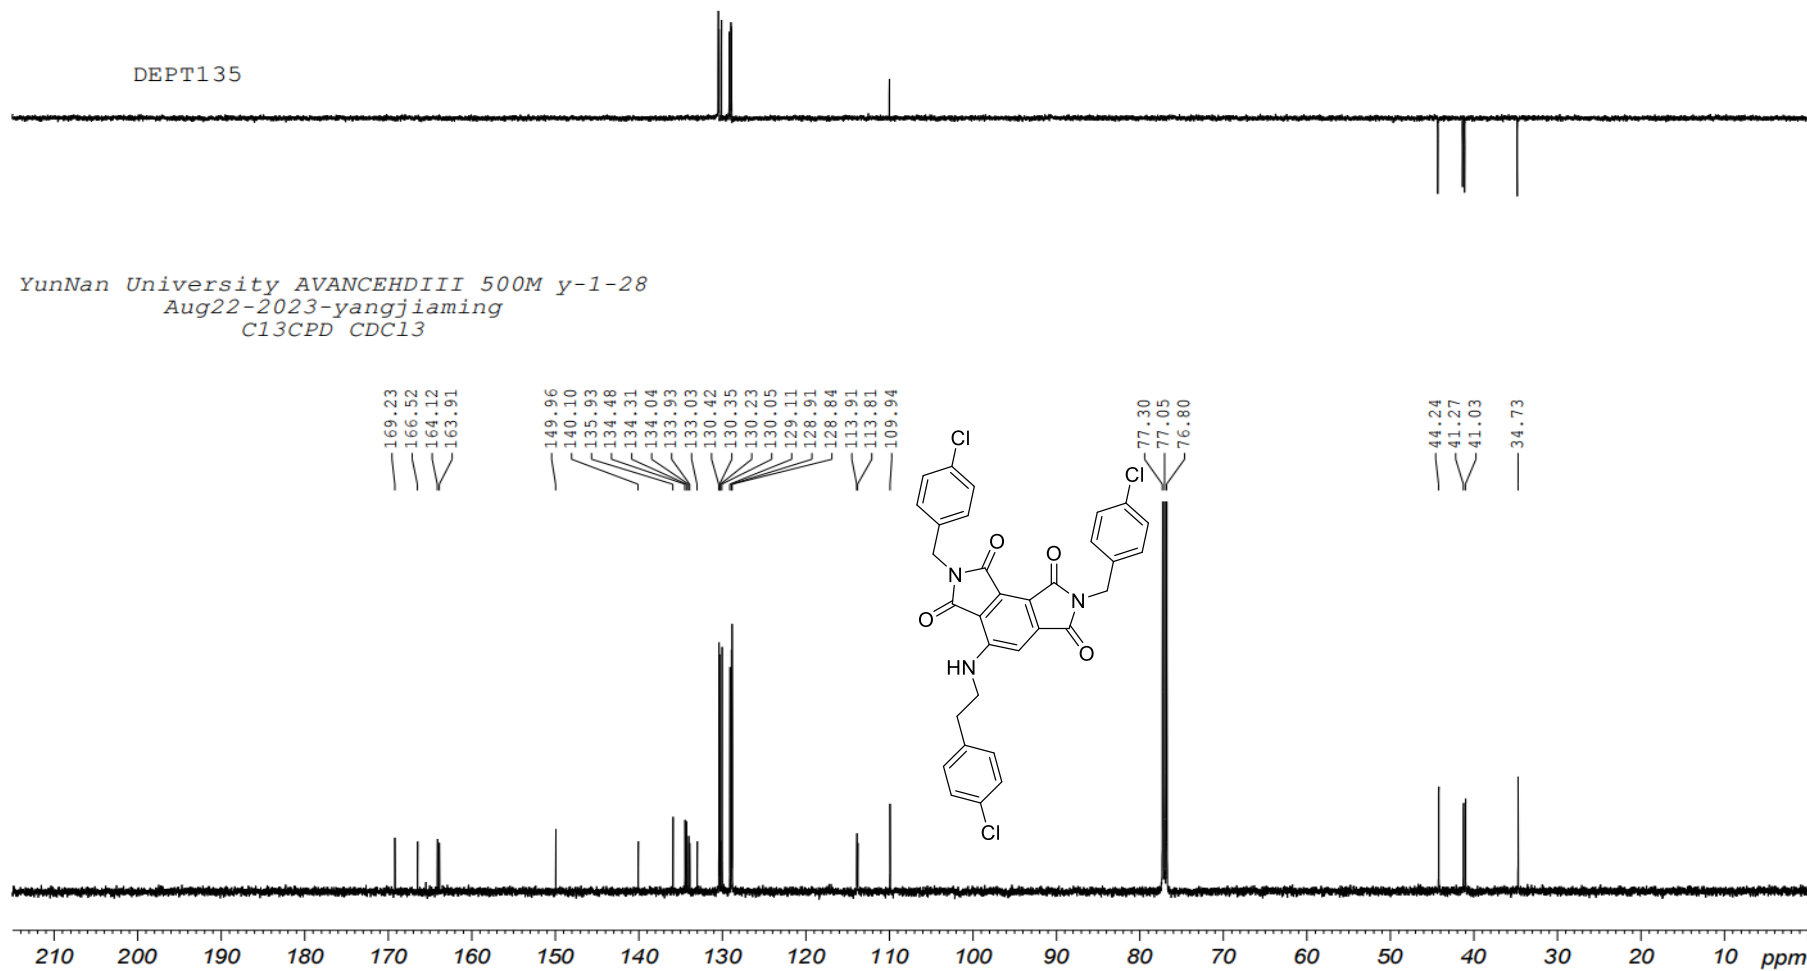

YunNan University AVANCEHDIII 500M y-1-31  
Aug23-2023-yangjiaming  
PROTON CDCl3

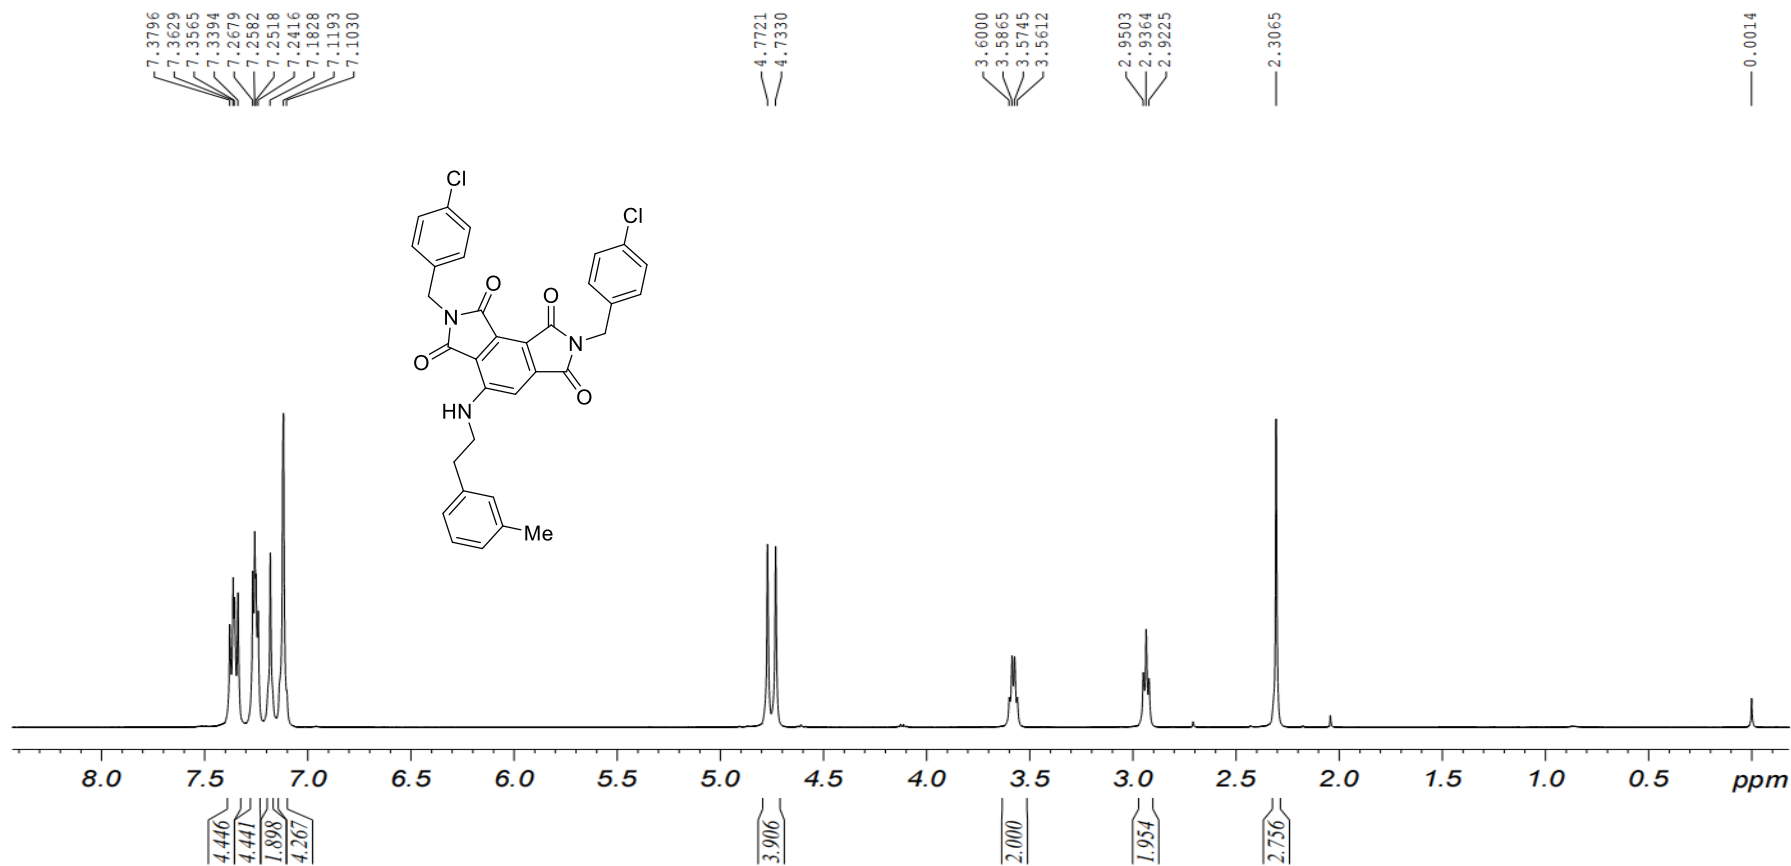

Figure S21. <sup>1</sup>H NMR (500 MHz, CDCl<sub>3</sub>) spectra of compound 3j

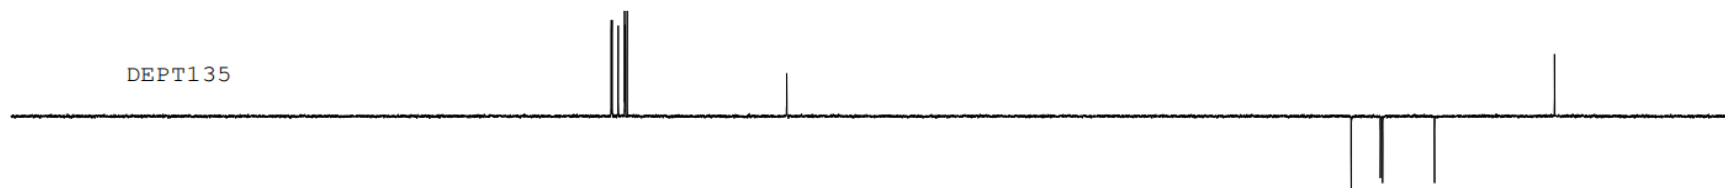

YunNan University AVANCEHDIII 500M y-1-31  
 Aug22-2023-yangjiaming  
 C13CPD CDCl3

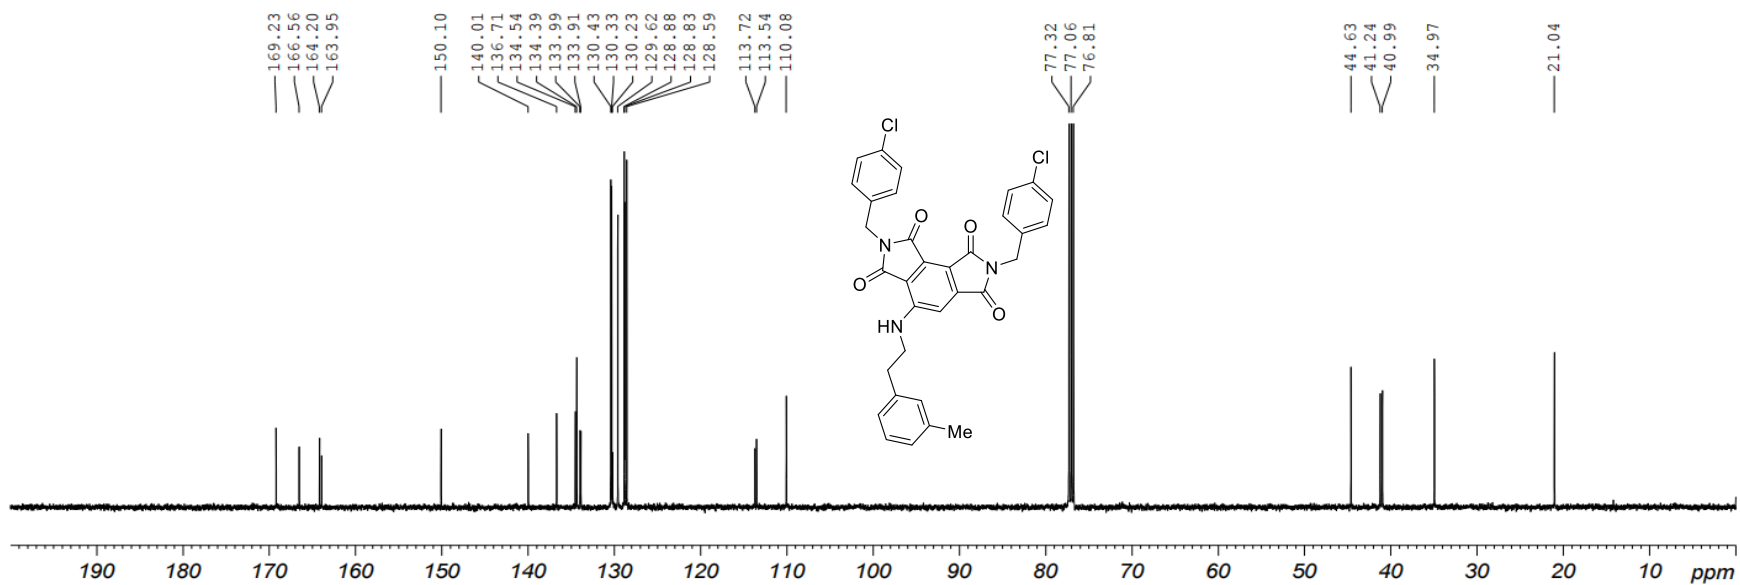

Figure S22. <sup>13</sup>C NMR (125 MHz, CDCl<sub>3</sub>) spectra of compound 3j

YunNan University AVANCEHDIII 500M y-1-27  
Jul31-2023-yangjiaming  
PROTON DMSO

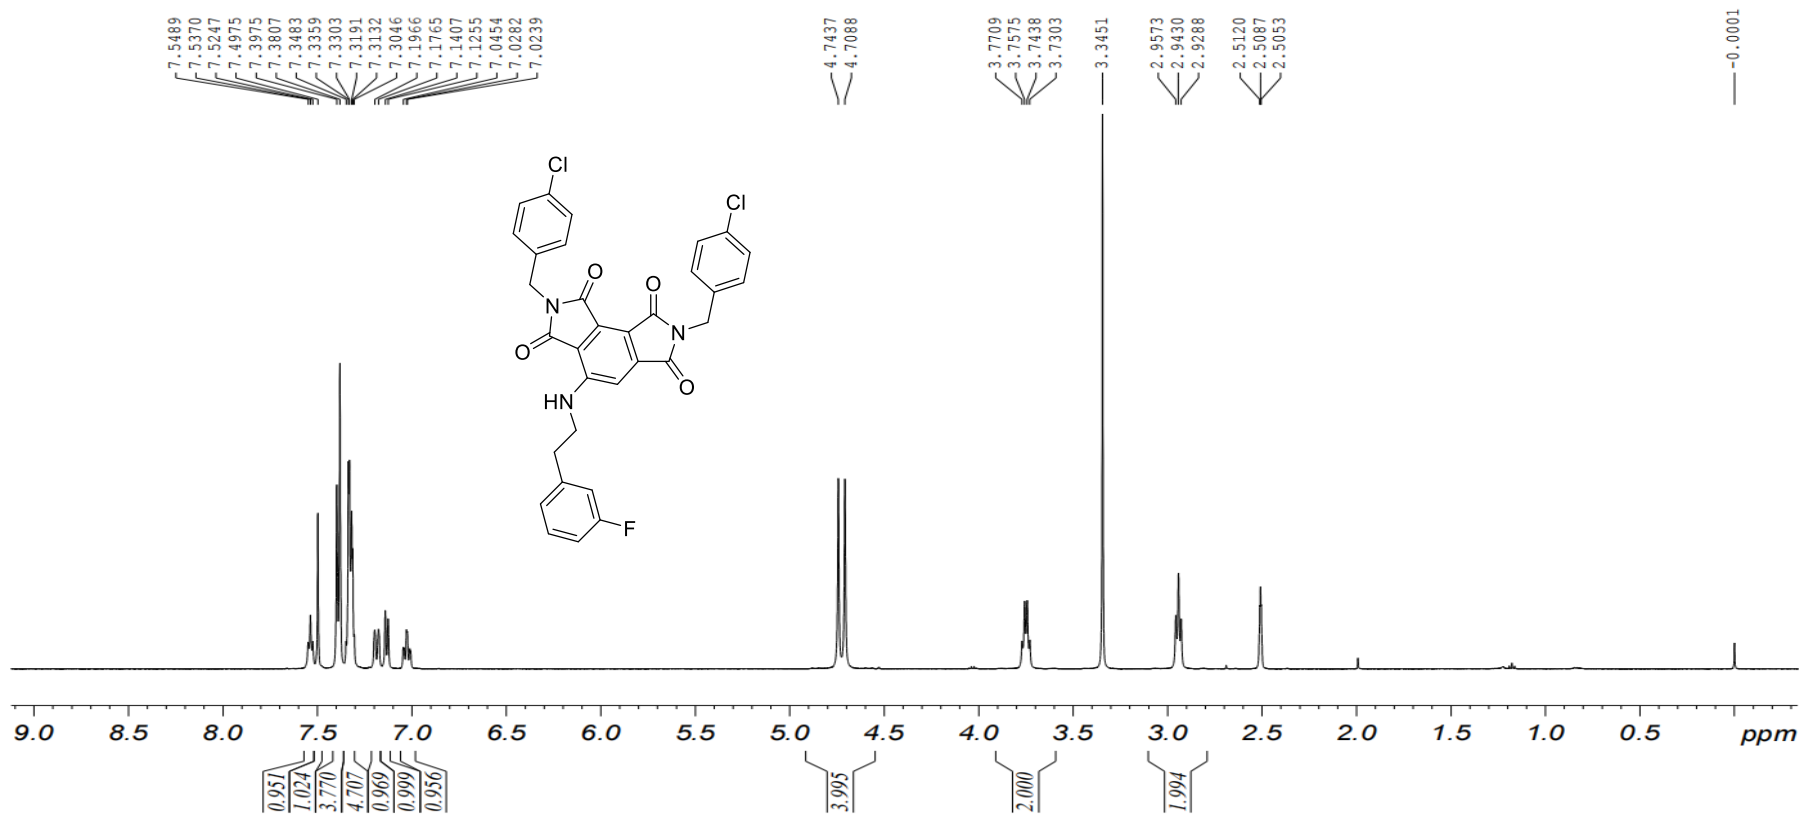

Figure S23.  $^1\text{H}$  NMR (500 MHz,  $\text{DMSO-}d_6$ ) spectra of compound 3k

DEPT135

YunNan University AVANCEHDIII 500M y-1-27  
Jul31-2023-yangjiaming  
C13CPD DMSO

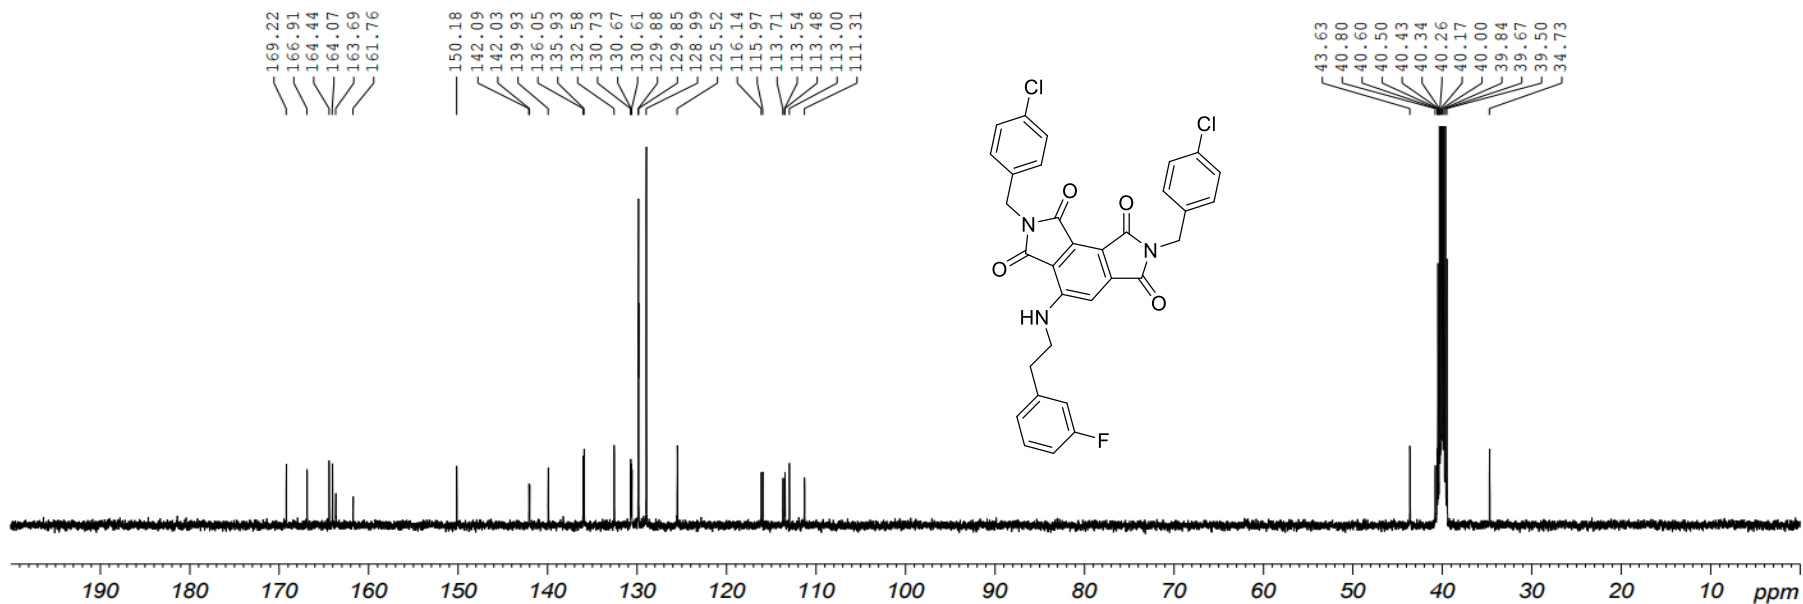

Figure S24.  $^{13}\text{C}$  NMR (125 MHz,  $\text{DMSO-}d_6$ ) spectra of compound **3k**



YunNan University AVANCEHDIII 500M y-1-27  
Jul31-2023-yangjiaming  
F19CPD DMSO

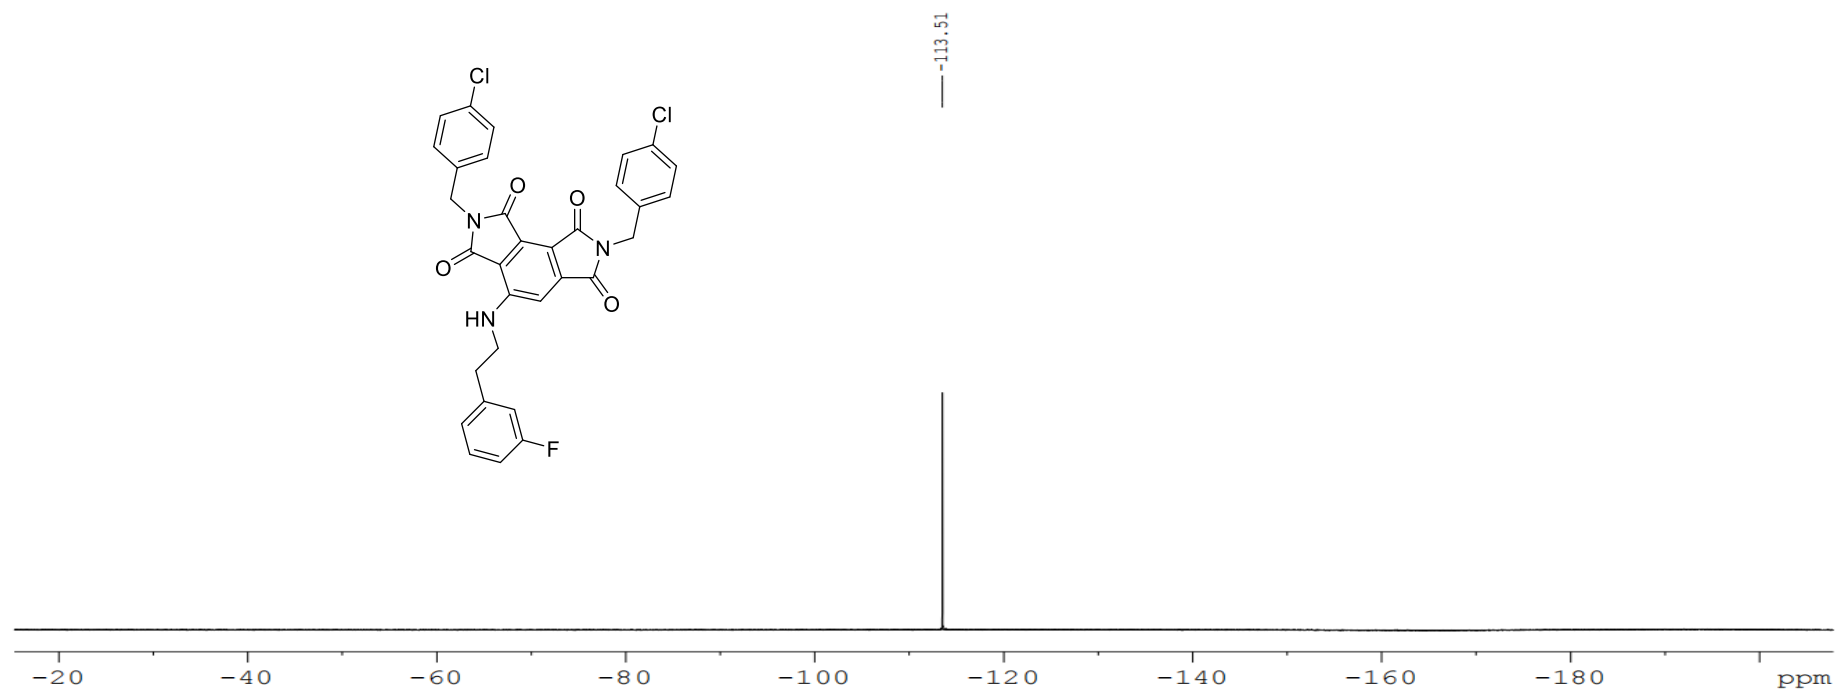

**Figure S25.**  $^{19}\text{F}$  NMR (470 MHz,  $\text{DMSO-}d_6$ ) spectra of compound 3k

YUNNAN UNIVERSITY ASCEND AVIIIHD600 y-1-39  
Sep01-2023-yangjiaming  
PROTON CDCl3

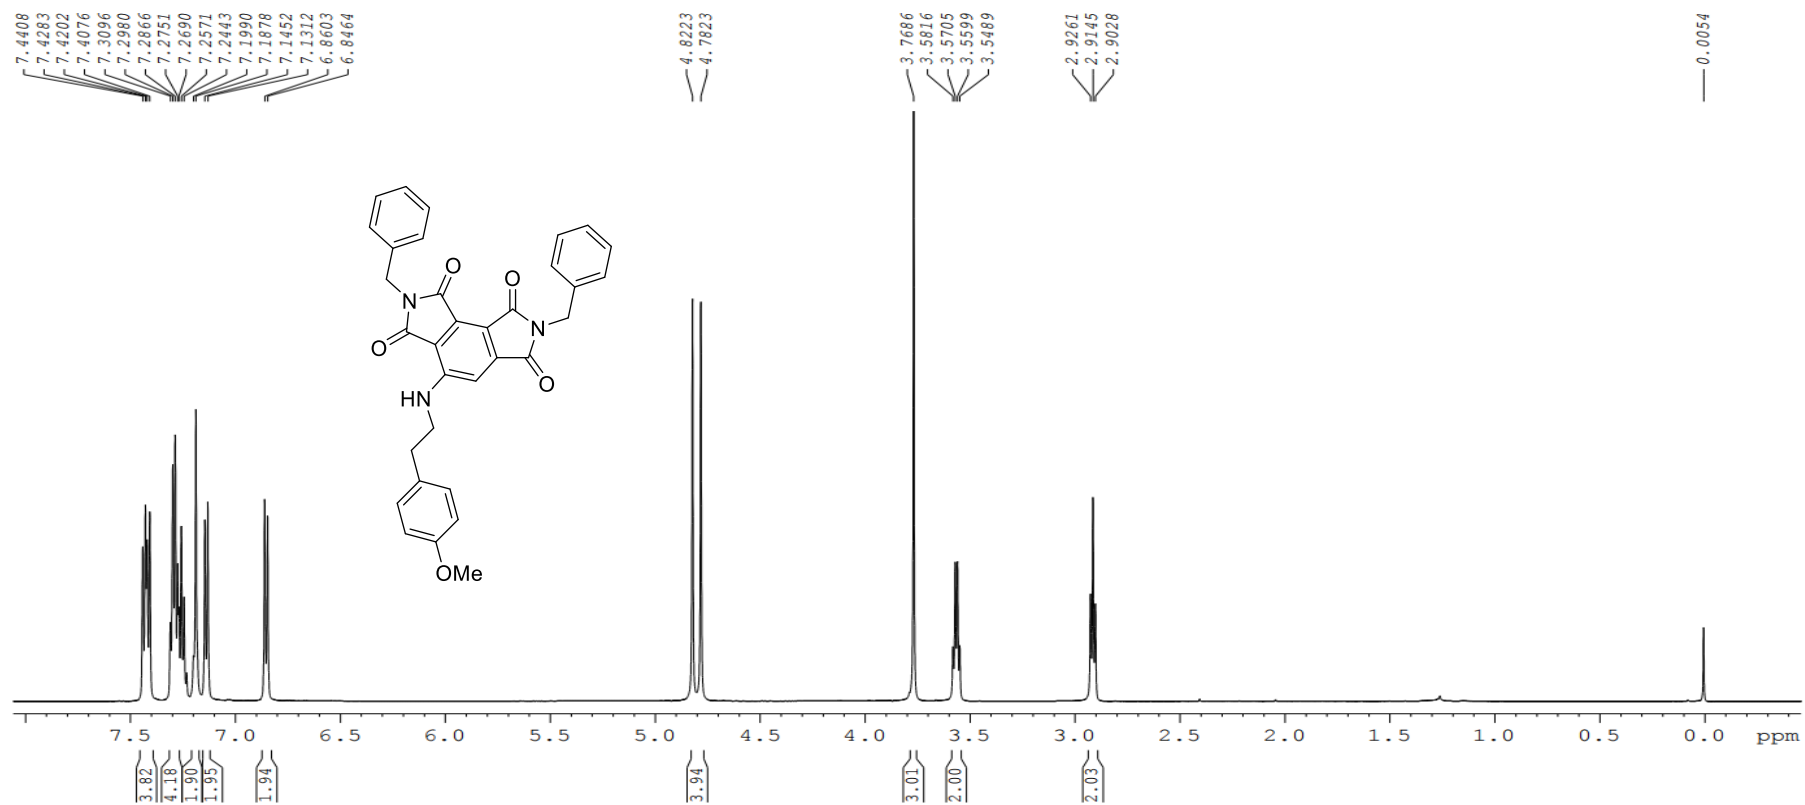

Figure S26.  $^1\text{H}$  NMR (600 MHz,  $\text{CDCl}_3$ ) spectra of compound **31**

DEPT135

YUNNAN UNIVERSITY ASCEND AVIIIHD600 y-1-39  
Sep01-2023-yangjiaming  
C13CPD CDC13

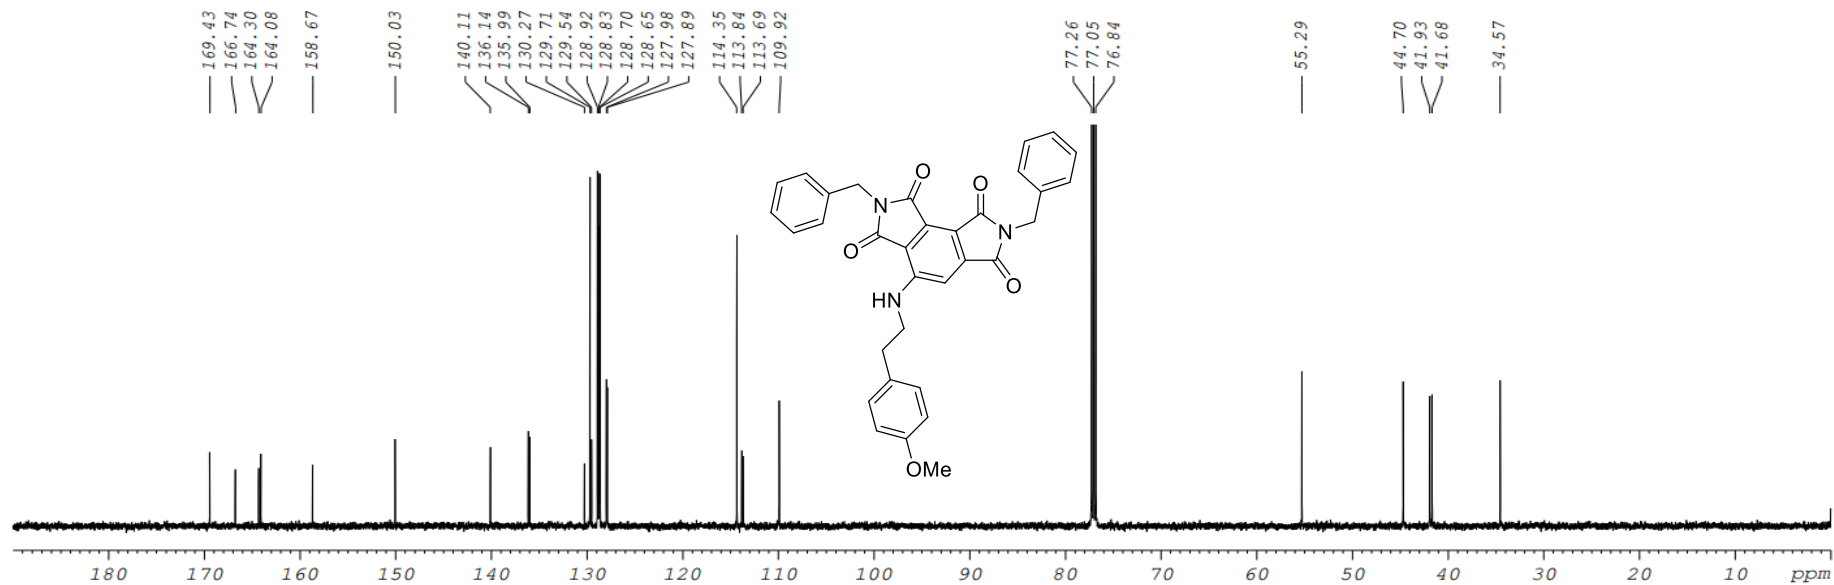

Figure S27. <sup>13</sup>C NMR (150 MHz, CDCl<sub>3</sub>) spectra of compound 31

YunNan University AVANCEHDIII 500M y-1-7  
Jul22-2023-yangjiaming  
PROTON CDCl3

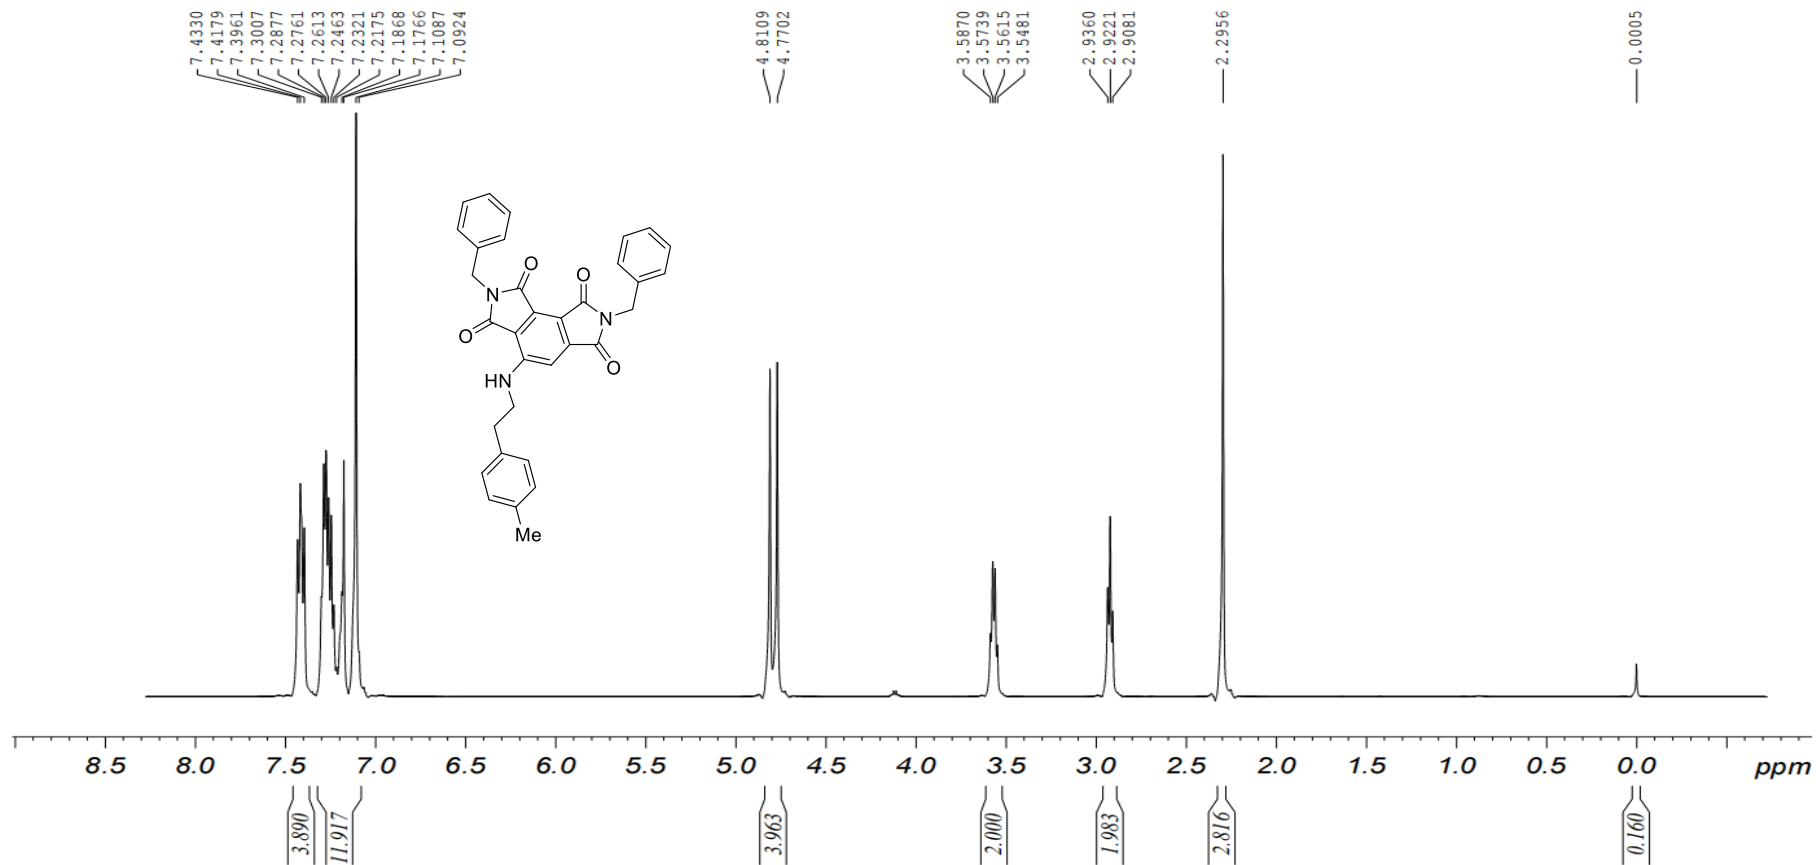

Figure S28.  $^1\text{H NMR}$  (500 MHz,  $\text{CDCl}_3$ ) spectra of compound **3m**

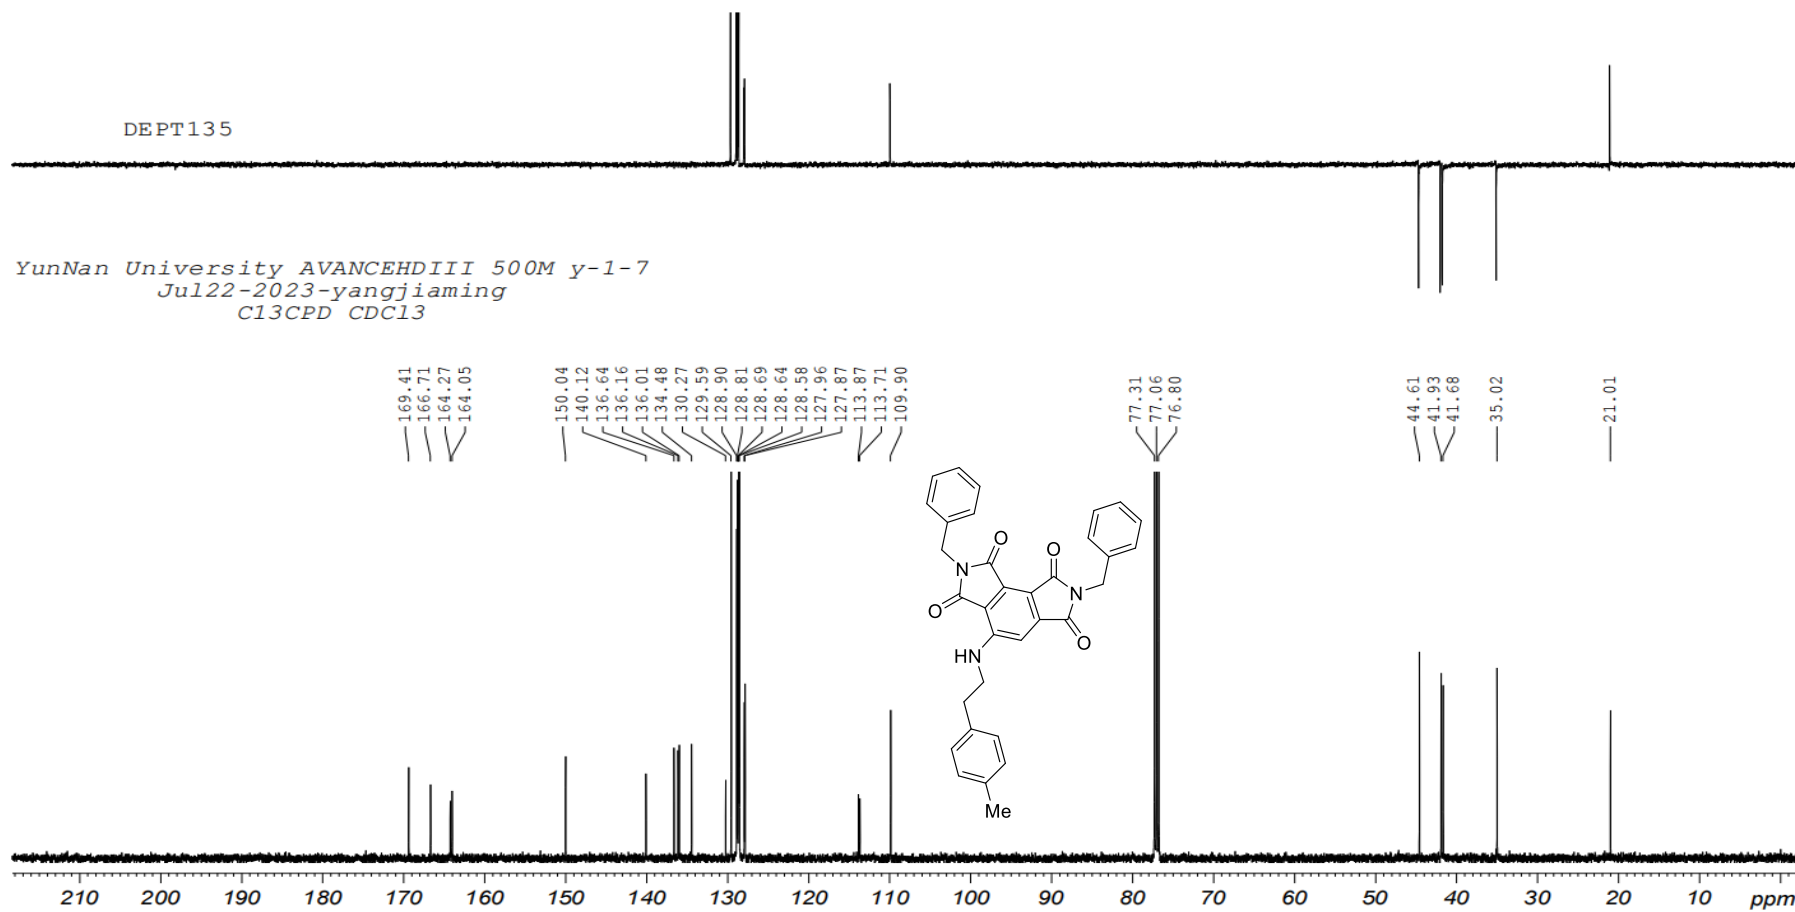

Figure S29.  $^{13}\text{C}$  NMR (125 MHz,  $\text{CDCl}_3$ ) spectra of compound **3m**

YunNan University AVANCEHDIII 500M y-1-4  
Jul21-2023-yangjiaming  
PROTON CDC13

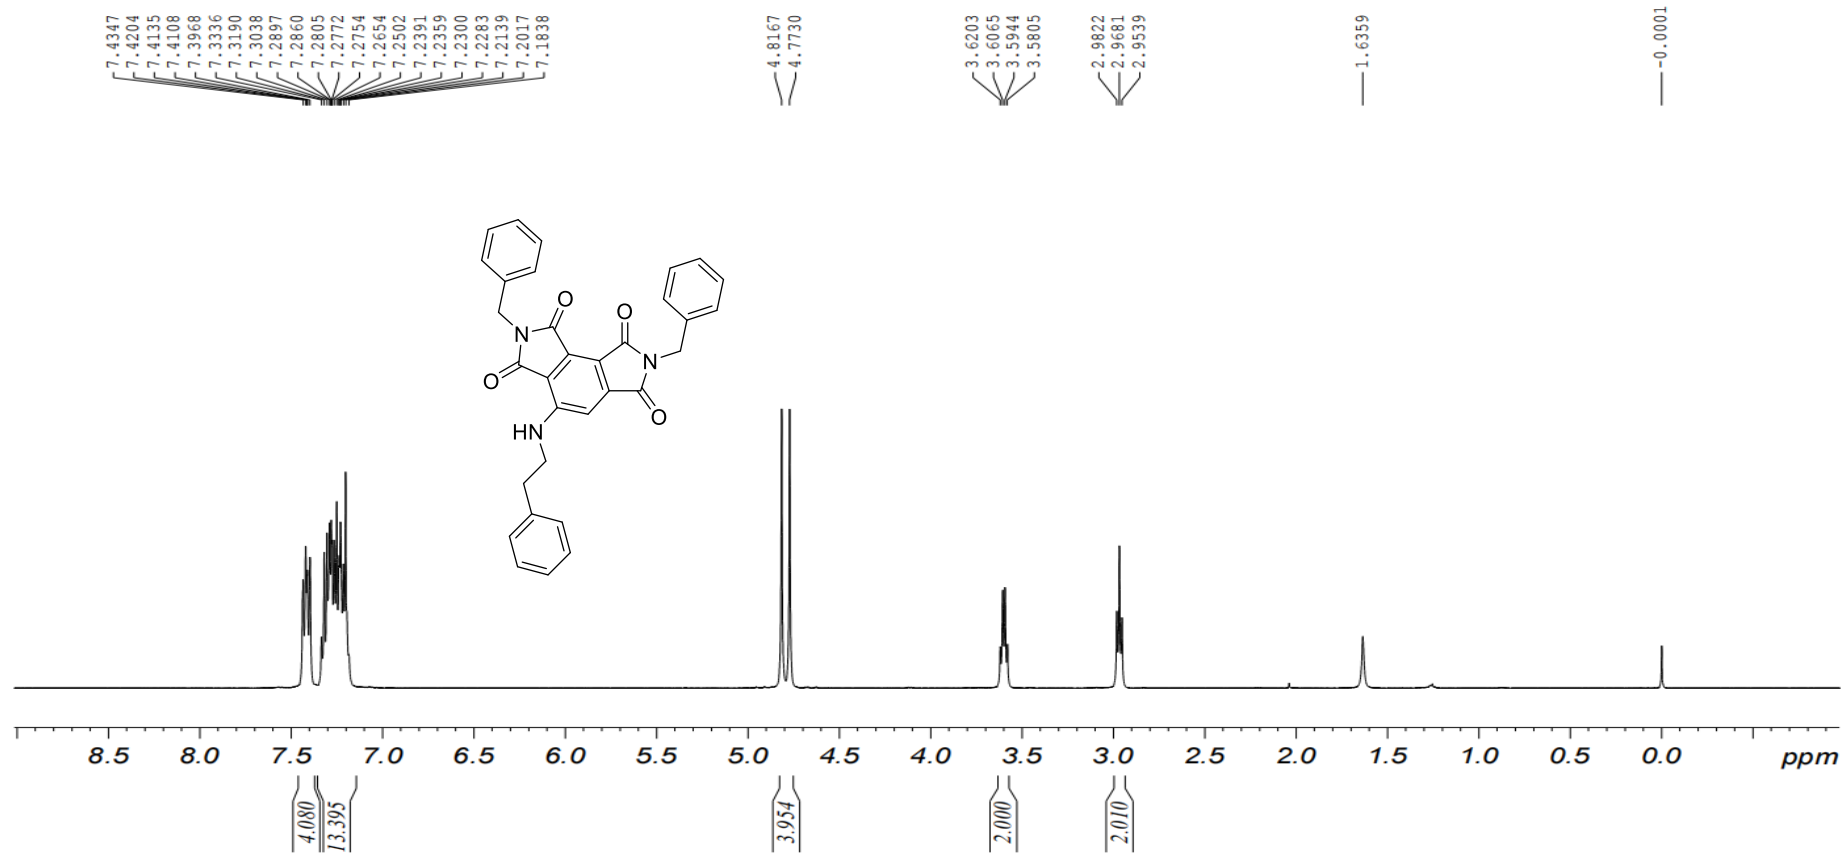

Figure S30.  $^1\text{H}$  NMR (500 MHz,  $\text{CDCl}_3$ ) spectra of compound 3n

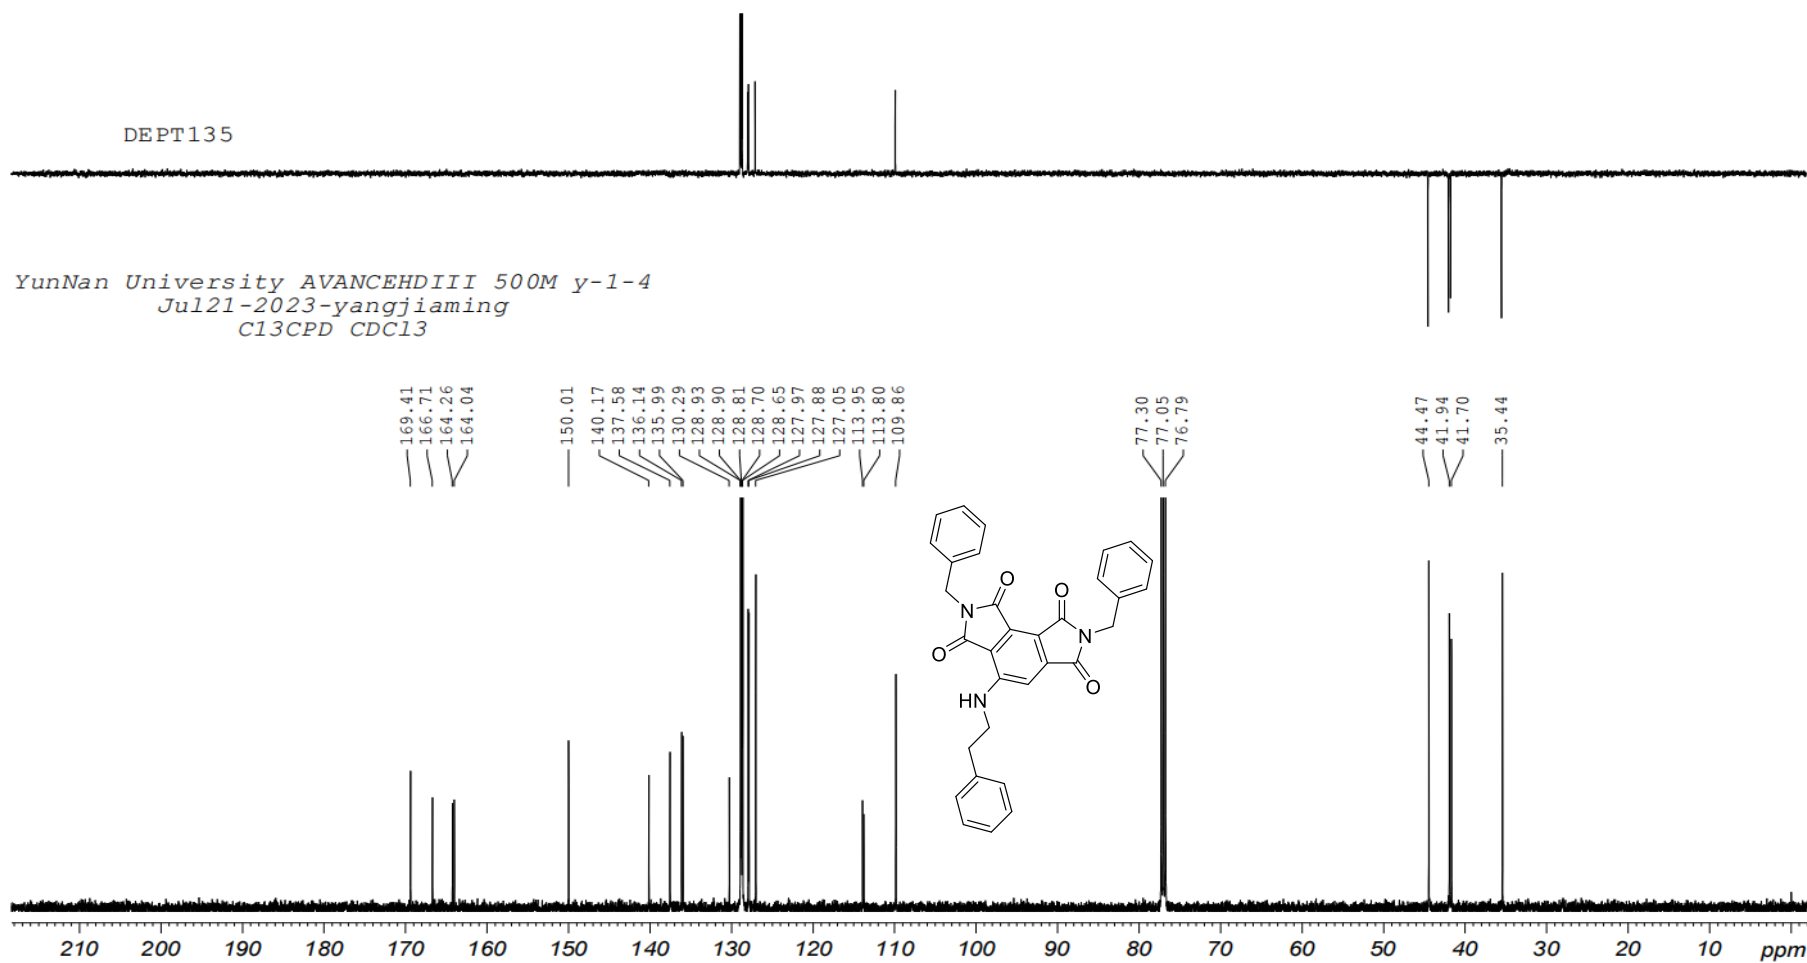

Figure S31.  $^{13}\text{C}$  NMR (125 MHz,  $\text{CDCl}_3$ ) spectra of compound 3n

YunNan University AVANCEHDIII 500M y-1-5  
Jul22-2023-yangjiaming  
PROTON CDCl<sub>3</sub>

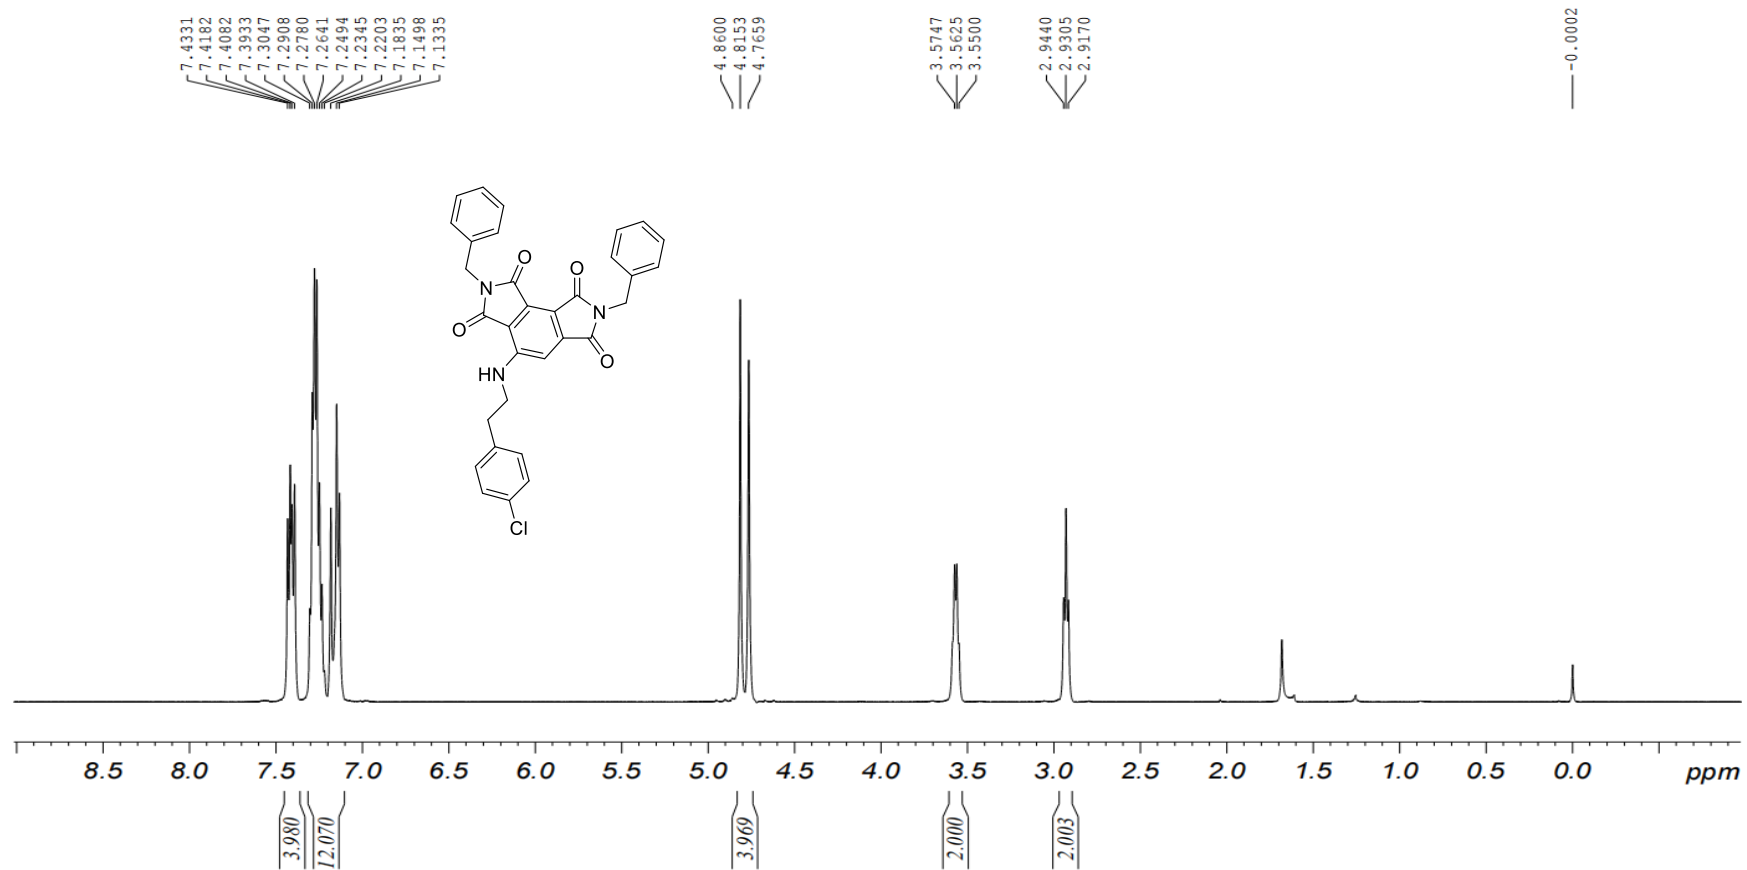

Figure S32. <sup>1</sup>H NMR (500 MHz, CDCl<sub>3</sub>) spectra of compound **3o**



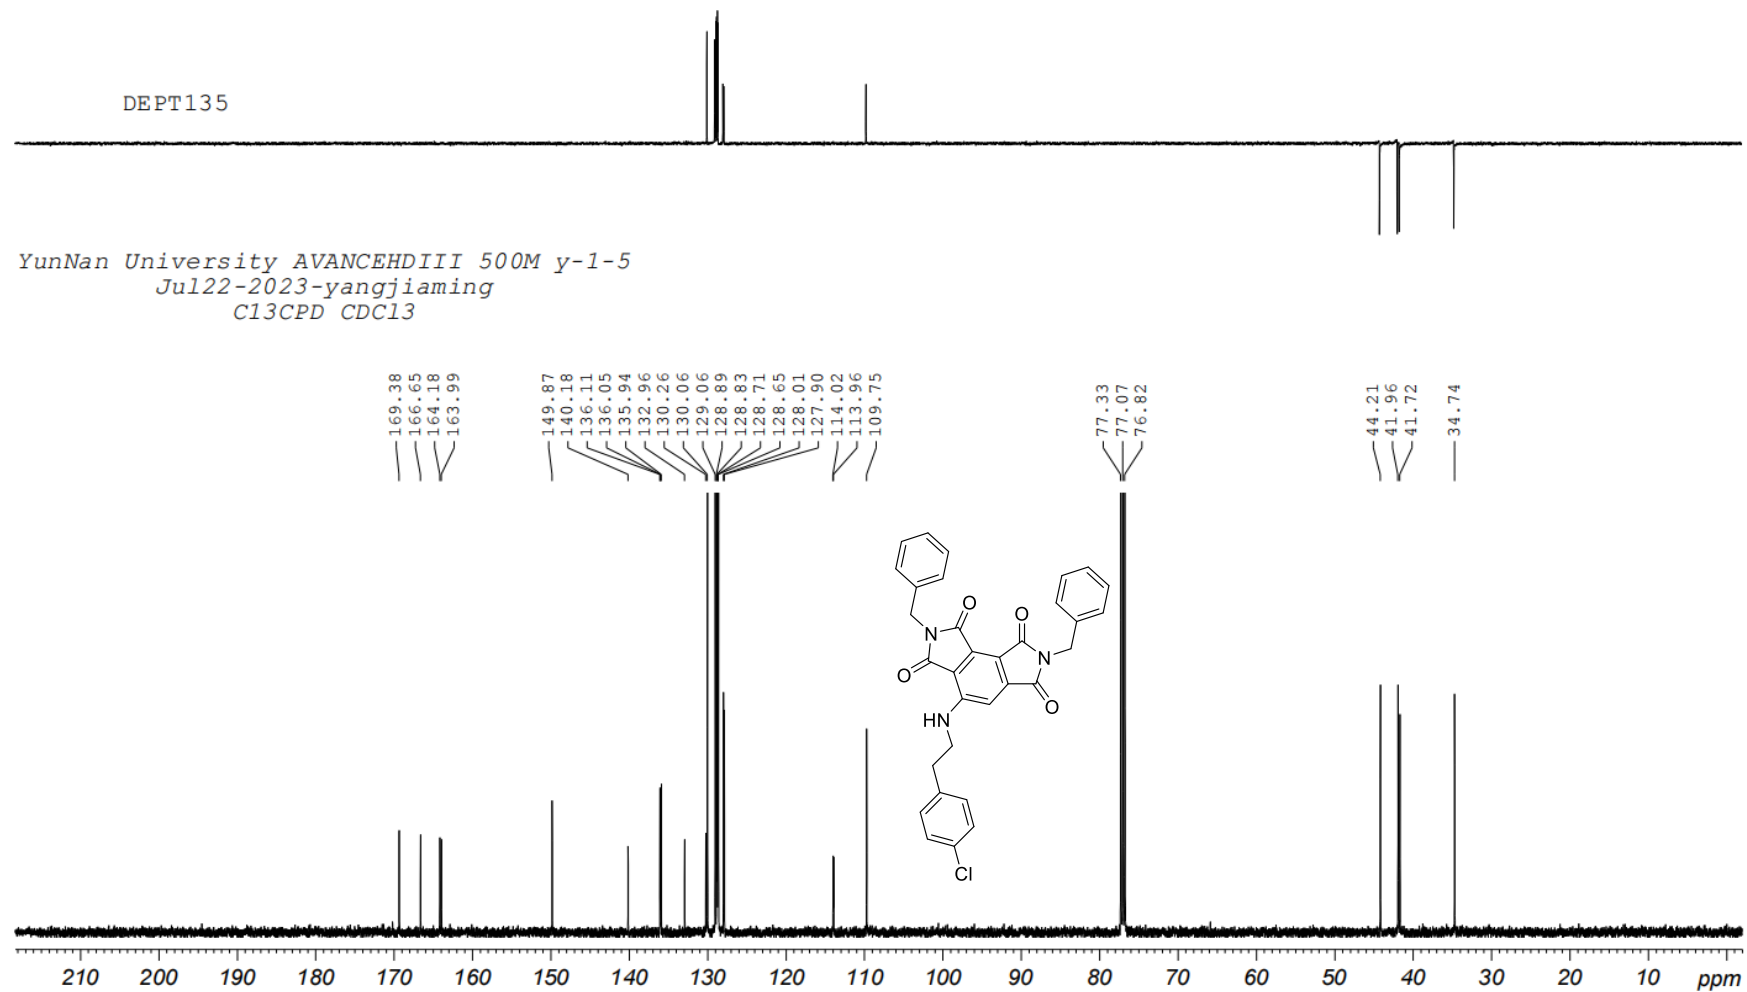

Figure S33.  $^{13}\text{C}$  NMR (125 MHz,  $\text{CDCl}_3$ ) spectra of compound **30**

YunNan University AVANCEHDIII 500M y-1-8  
Jul22-2023-yangjiaming  
PROTON CDCl3

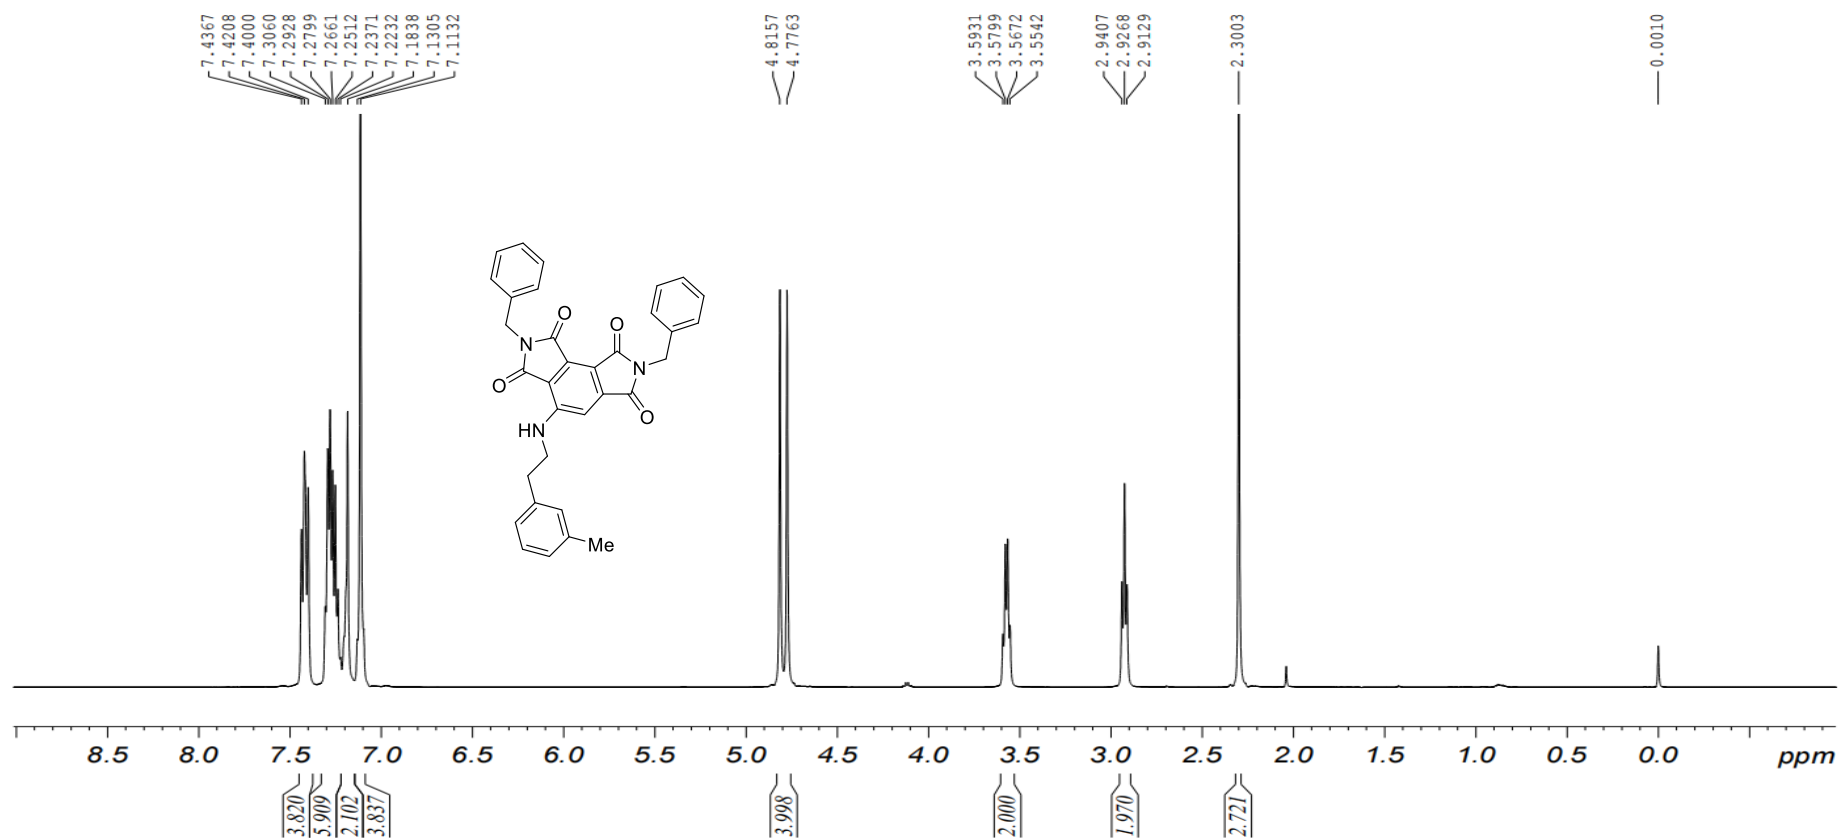

Figure S34. <sup>1</sup>H NMR (500 MHz, CDCl<sub>3</sub>) spectra of compound **3p**

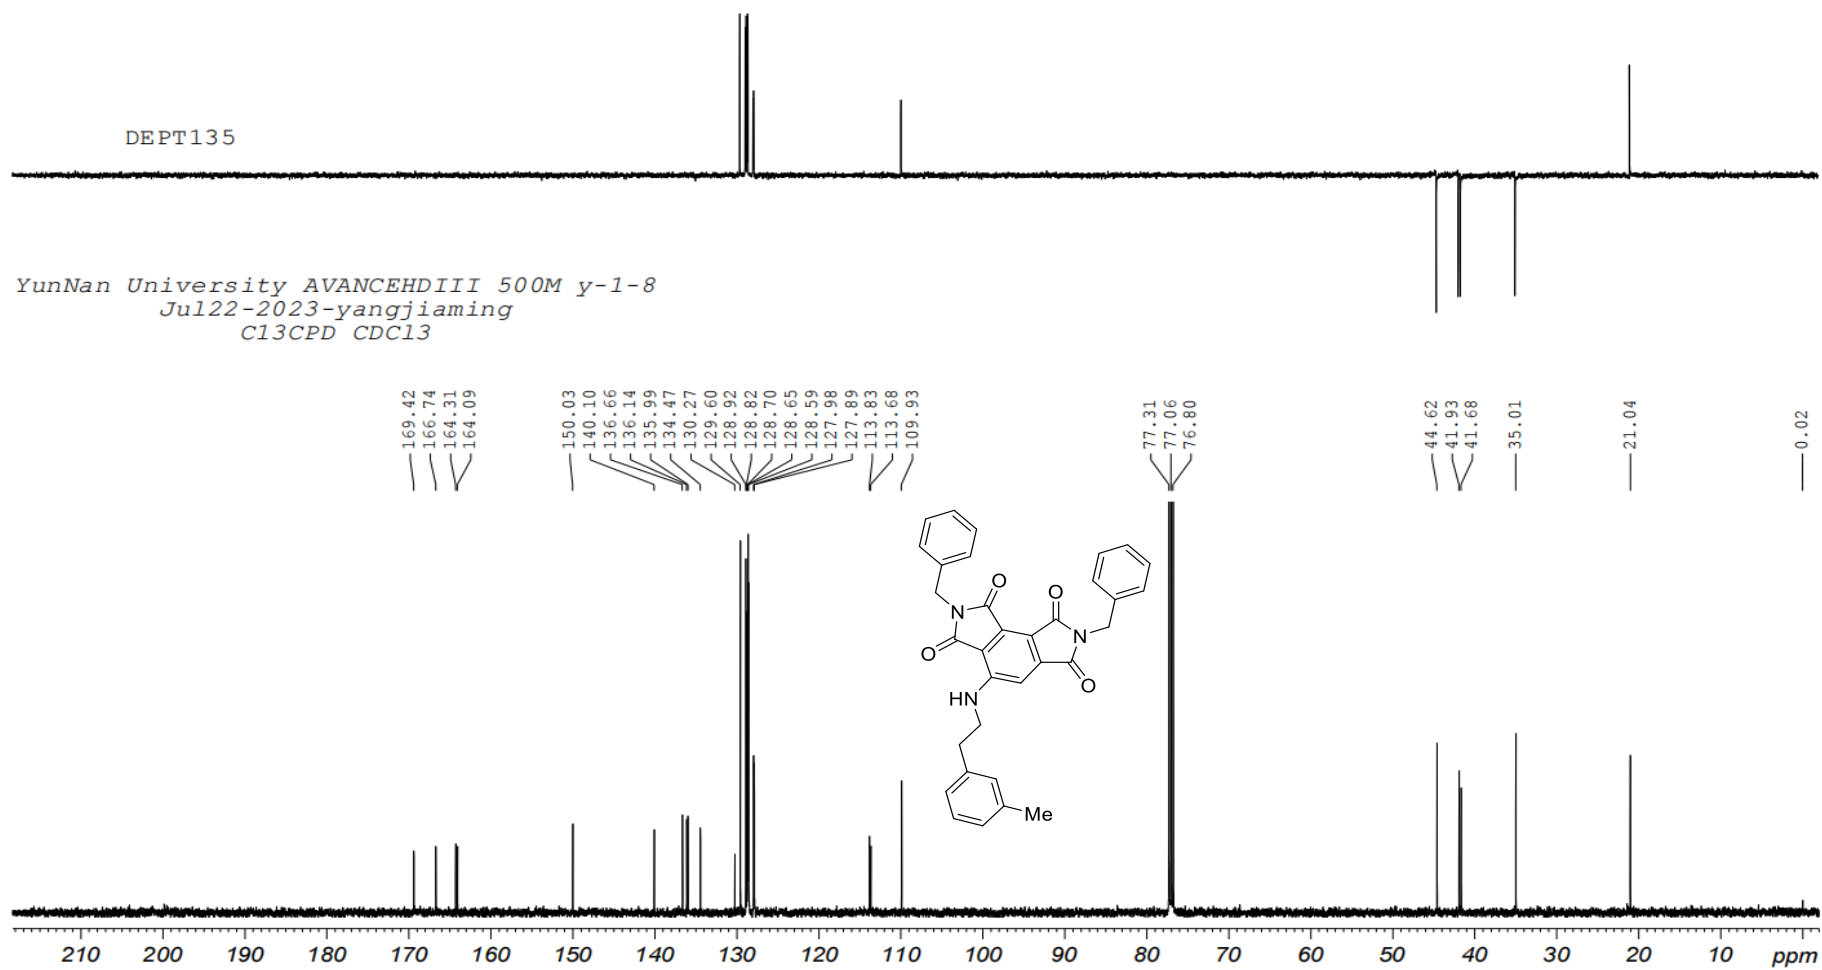

Figure S35.  $^{13}\text{C}$  NMR (125 MHz,  $\text{CDCl}_3$ ) spectra of compound 3p

YUNNAN UNIVERSITY ASCEND AVIIIHD600 Y-1-2  
Jun30-2023-yangjiaming  
PROTON DMSO

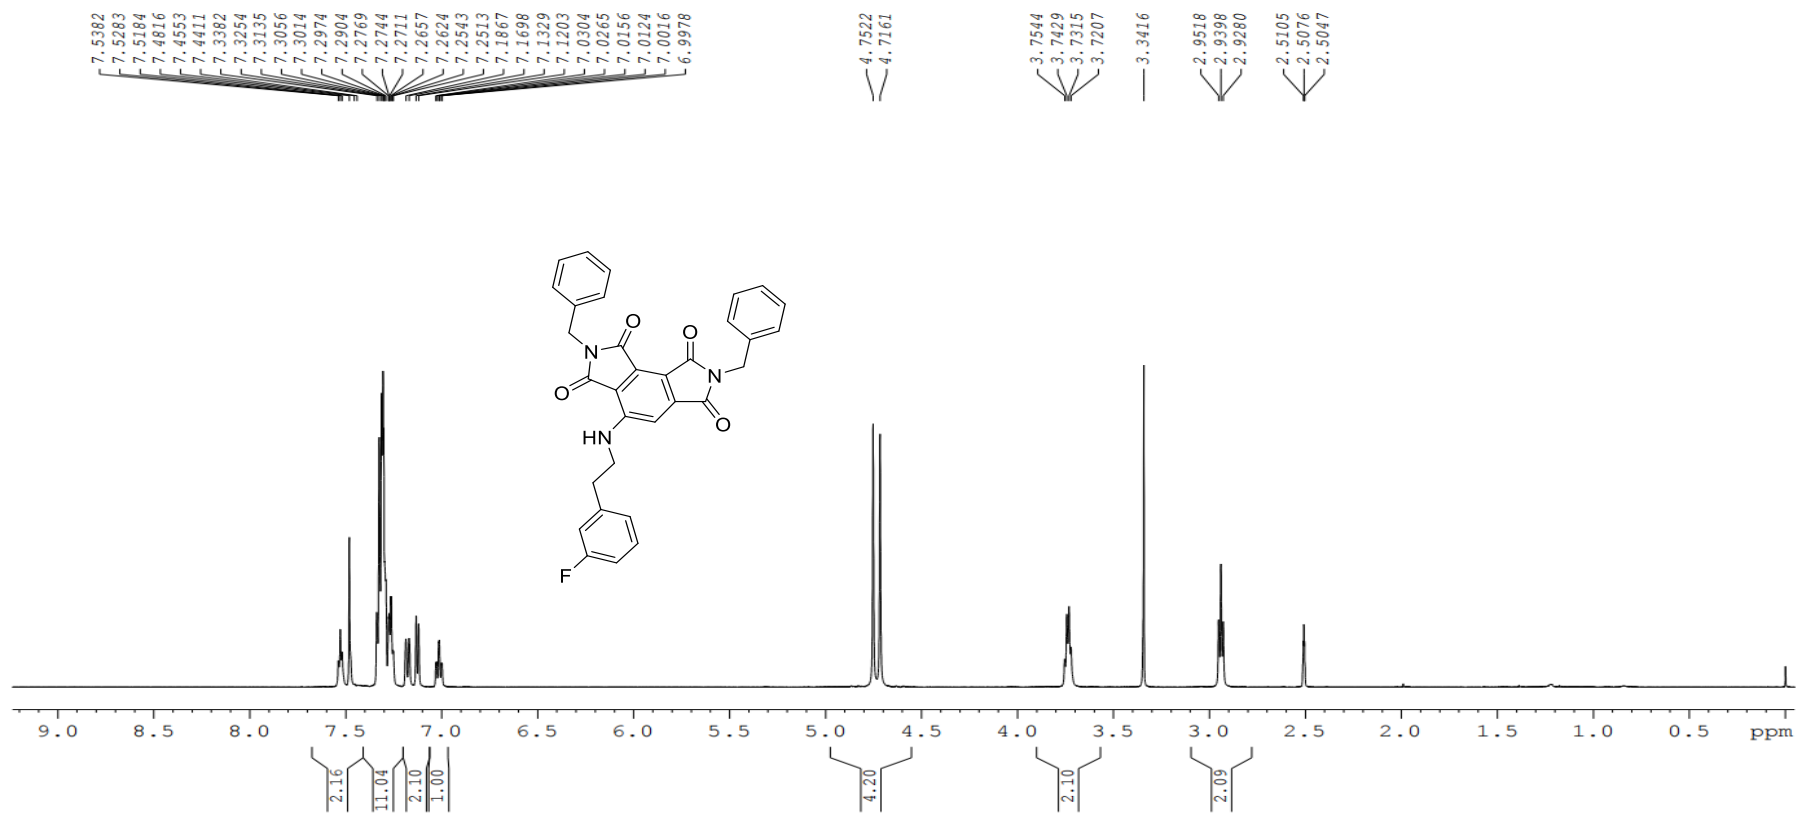

Figure S36.  $^1\text{H}$  NMR (600 MHz,  $\text{DMSO-}d_6$ ) spectra of compound **3q**

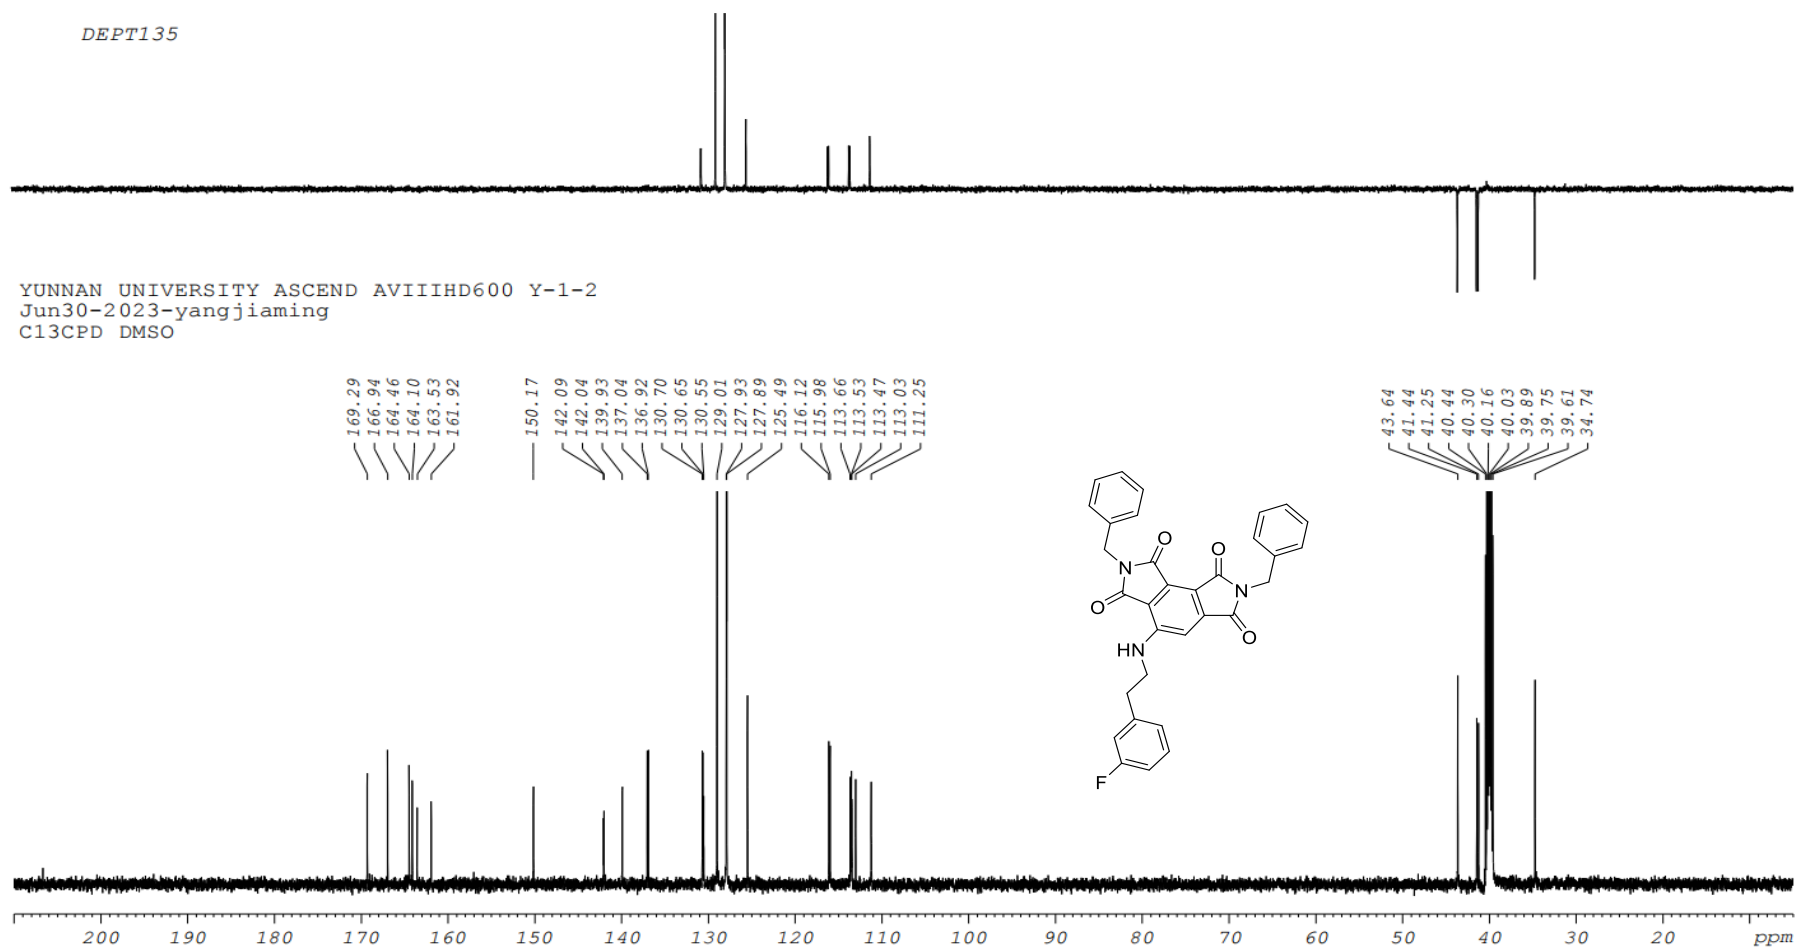

Figure S37.  $^{13}\text{C}$  NMR (125 MHz,  $\text{DMSO-}d_6$ ) spectra of compound **3q**

YunNan University AVANCEHDIII 500M y-1-38  
Aug23-2023-yangjiaming  
PROTON CDCl3

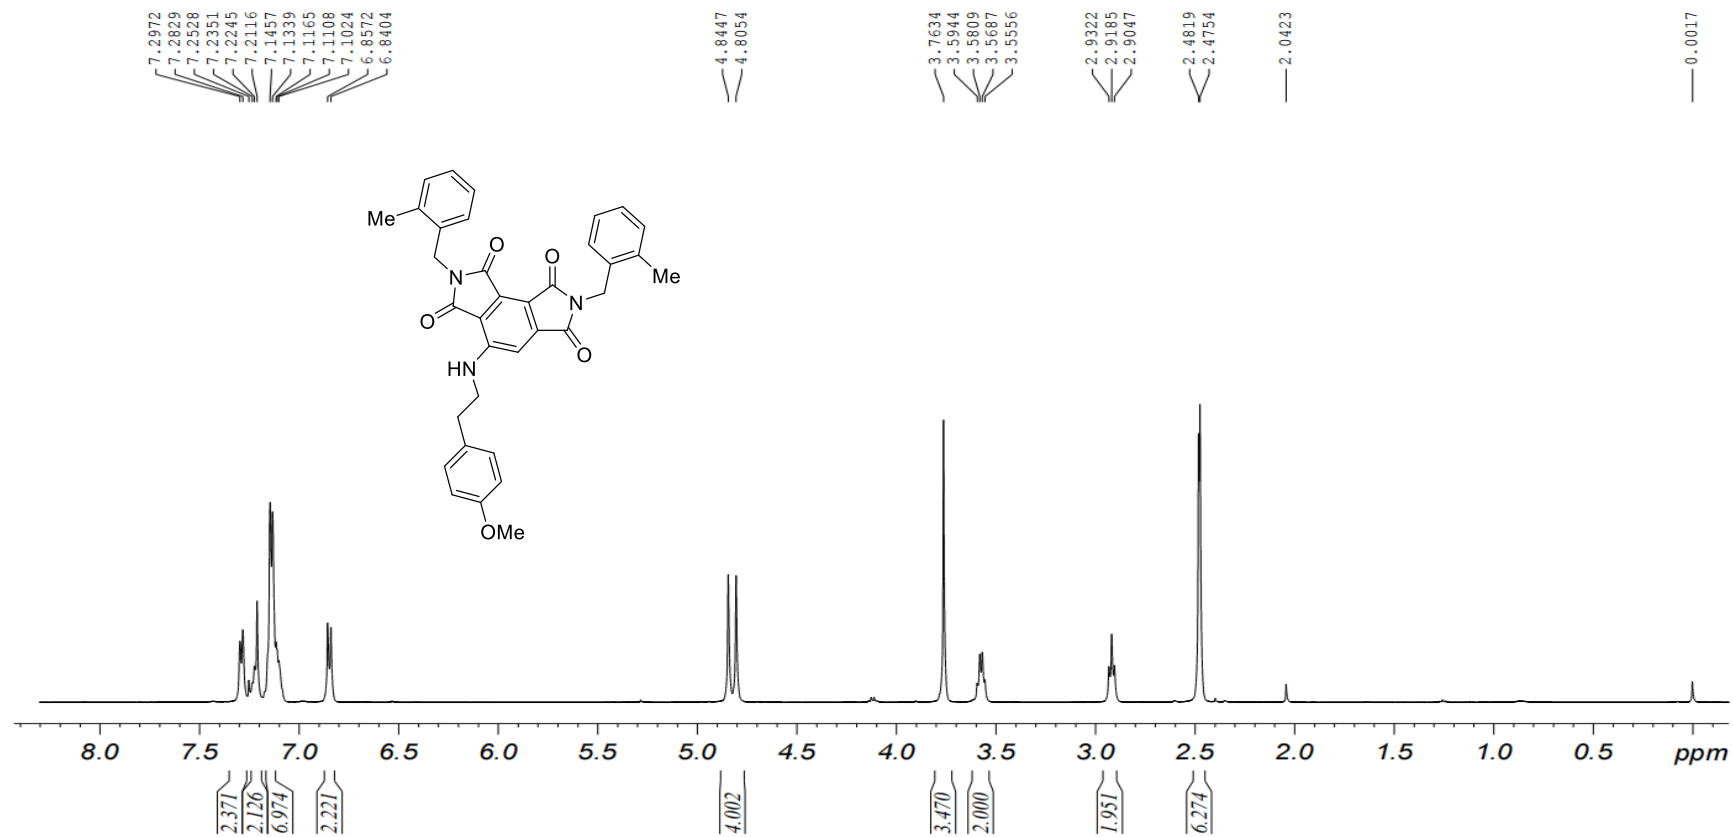

Figure S38. <sup>1</sup>H NMR (500 MHz, CDCl<sub>3</sub>) spectra of compound 3r

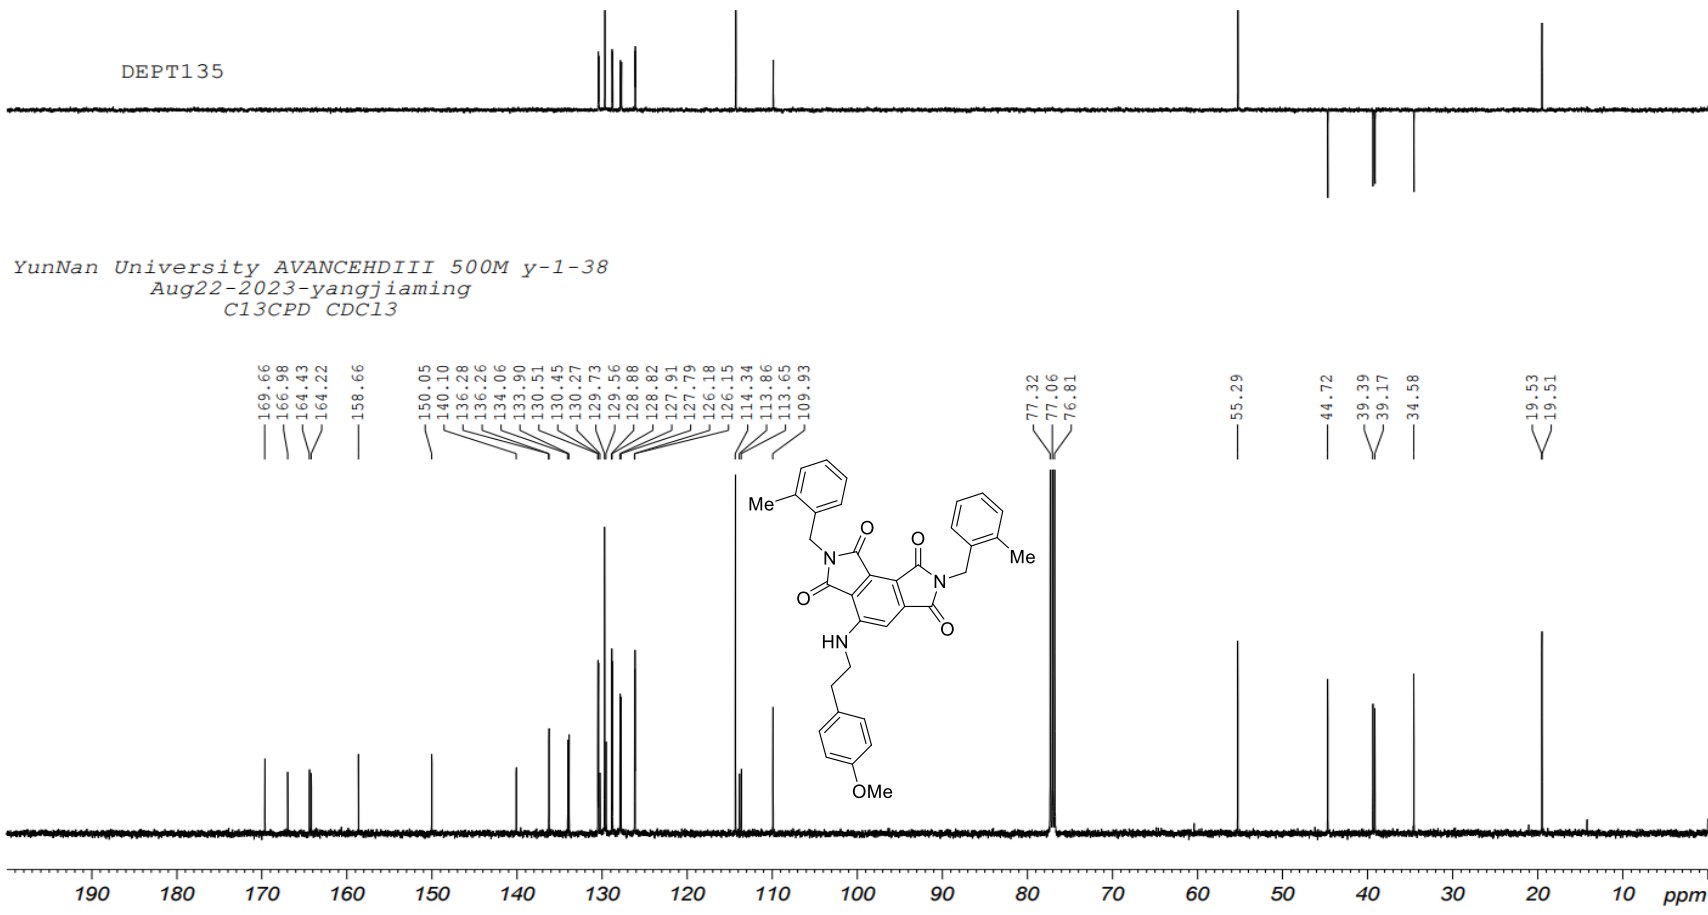

Figure S39. <sup>13</sup>C NMR (125 MHz, CDCl<sub>3</sub>) spectra of compound 3r

YunNan University AVANCEHDIII 500M y-1-35  
Aug22-2023-yangjiaming  
PROTON CDCl3

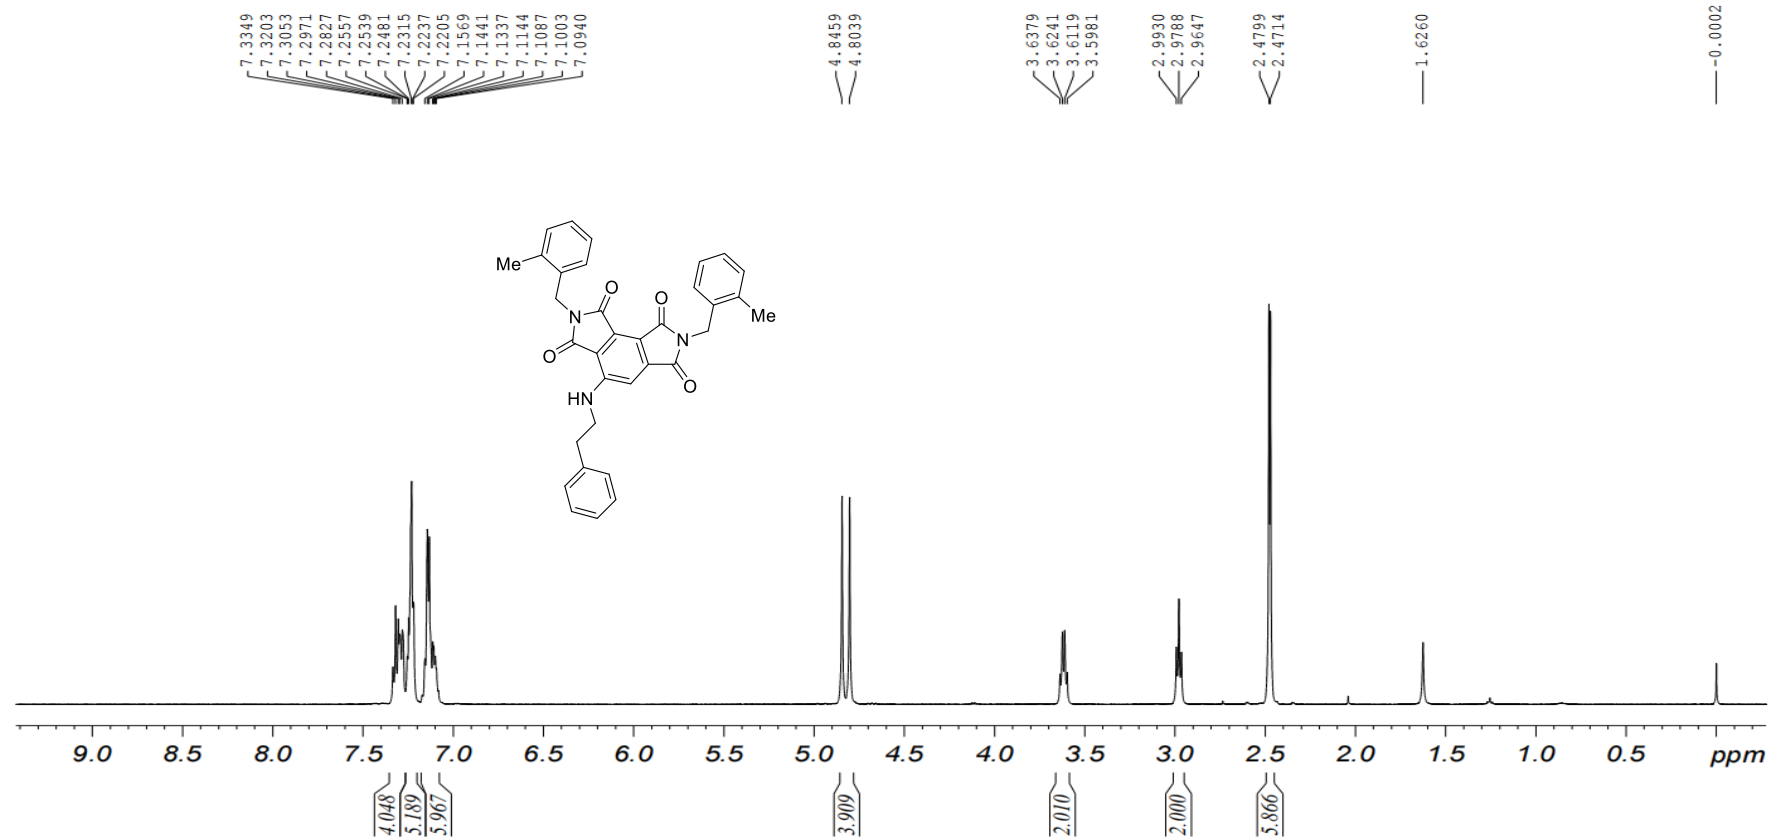

Figure S40. <sup>1</sup>H NMR (500 MHz, CDCl<sub>3</sub>) spectra of compound **3s**



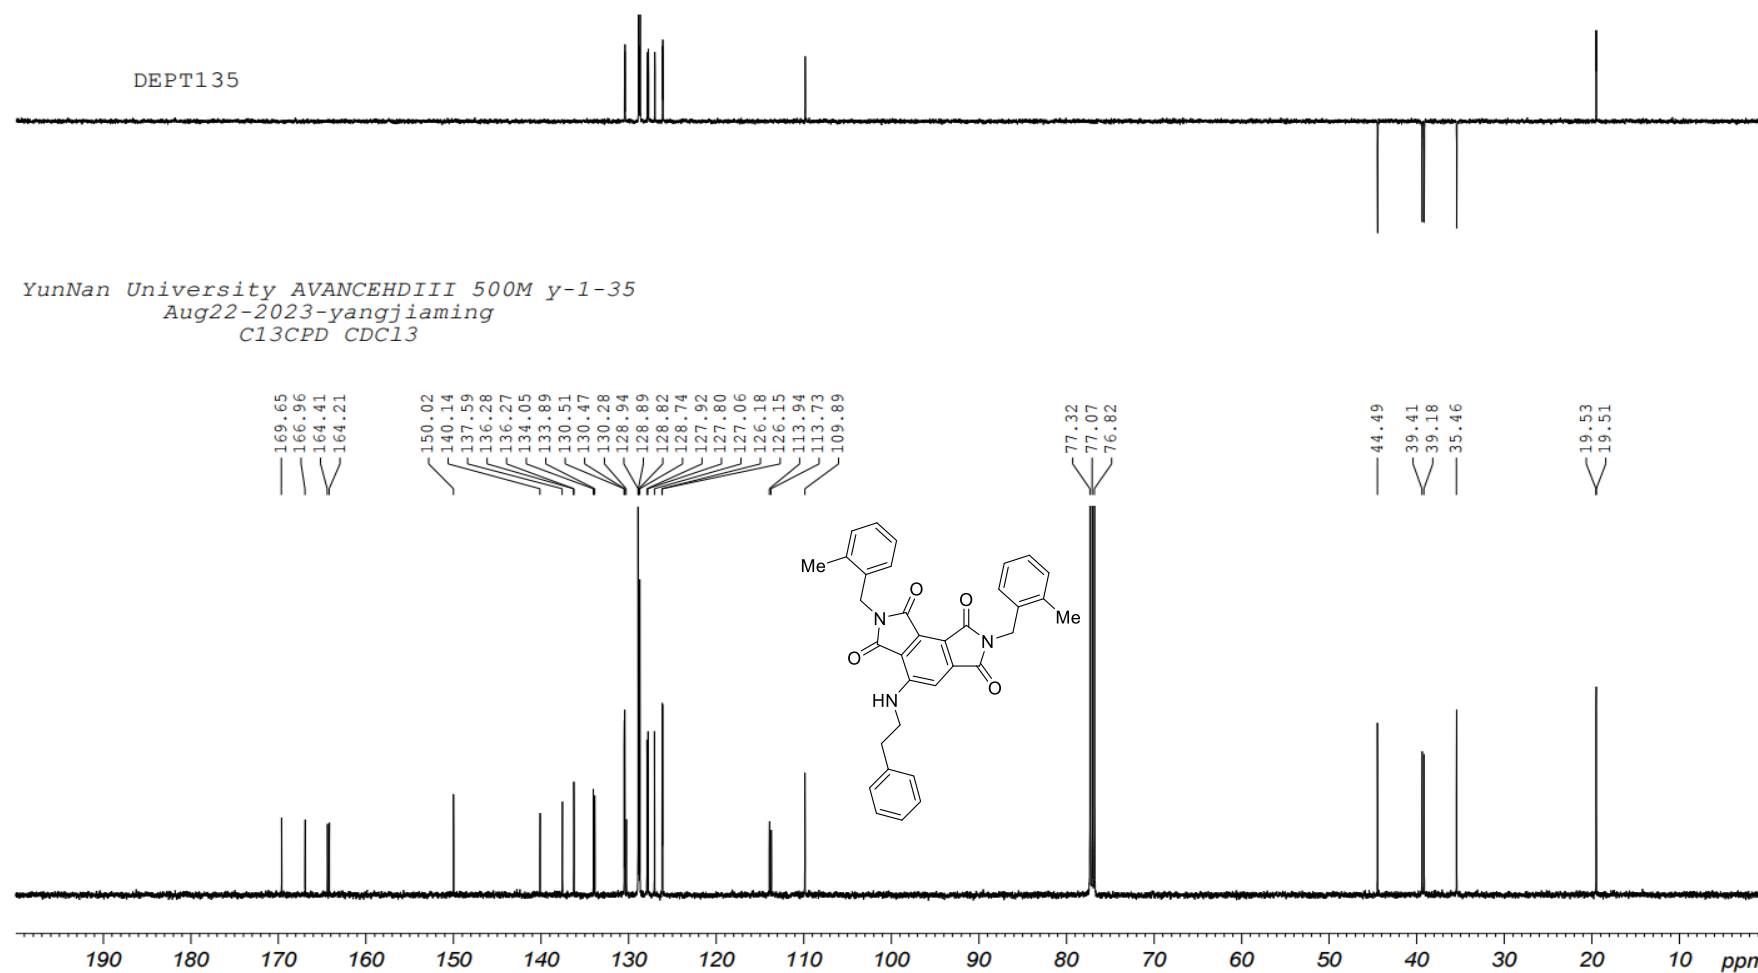

Figure S41. <sup>13</sup>C NMR (125 MHz, CDCl<sub>3</sub>) spectra of compound 3s

YunNan University AVANCEHDIII 500M y-1-34  
Aug22-2023-yangjiaming  
PROTON CDCl3

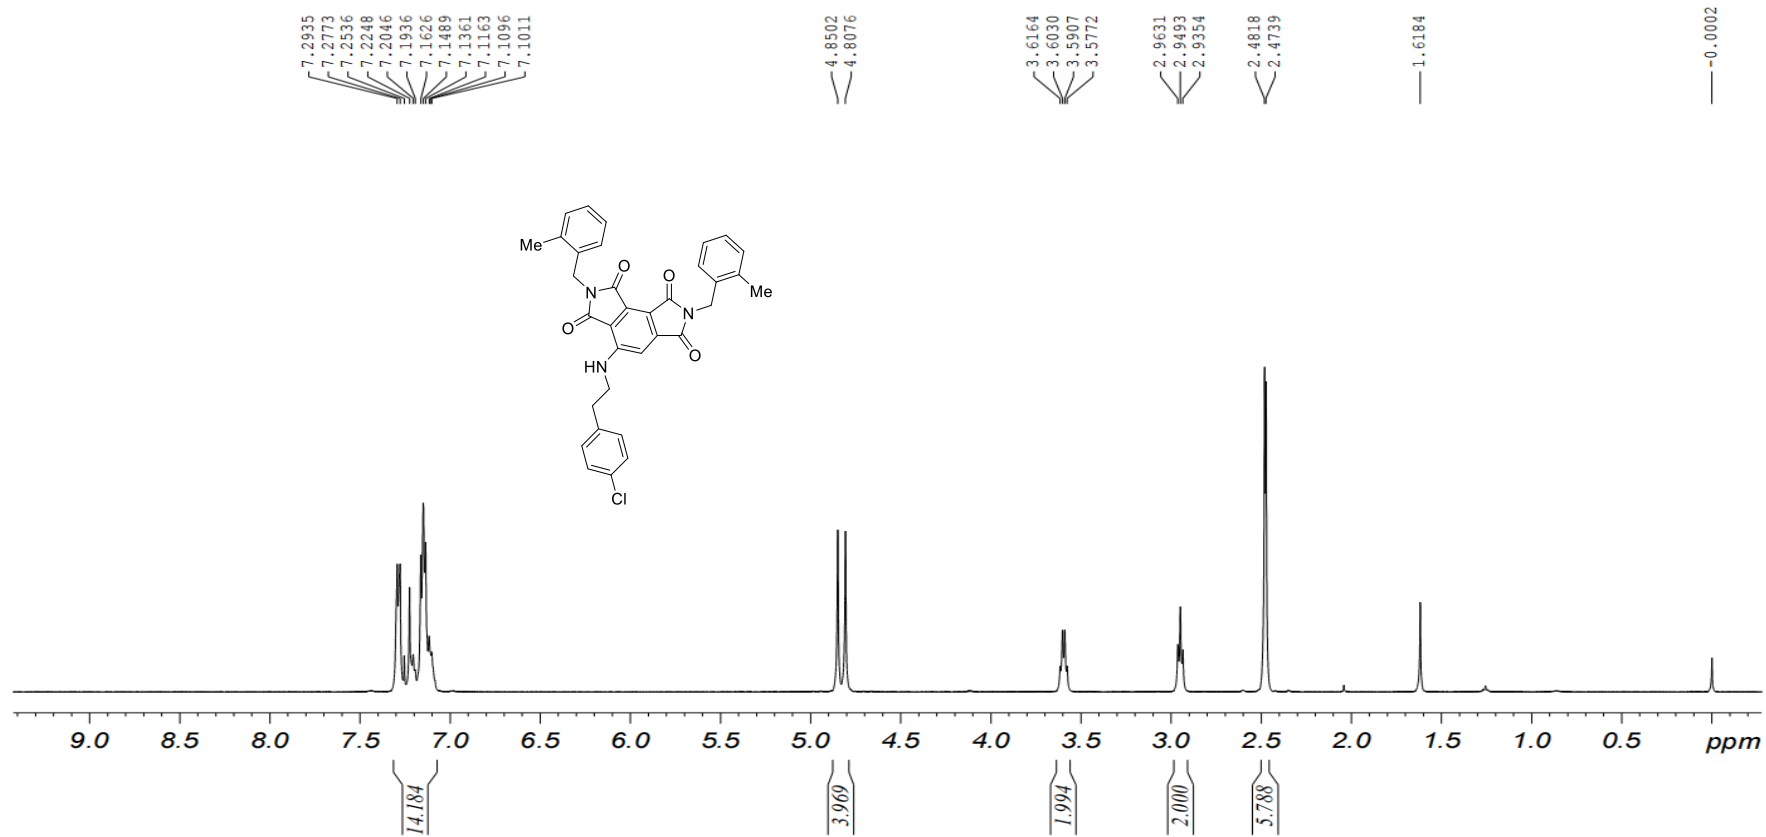

Figure S42.  $^1\text{H}$  NMR (500 MHz,  $\text{CDCl}_3$ ) spectra of compound 3t

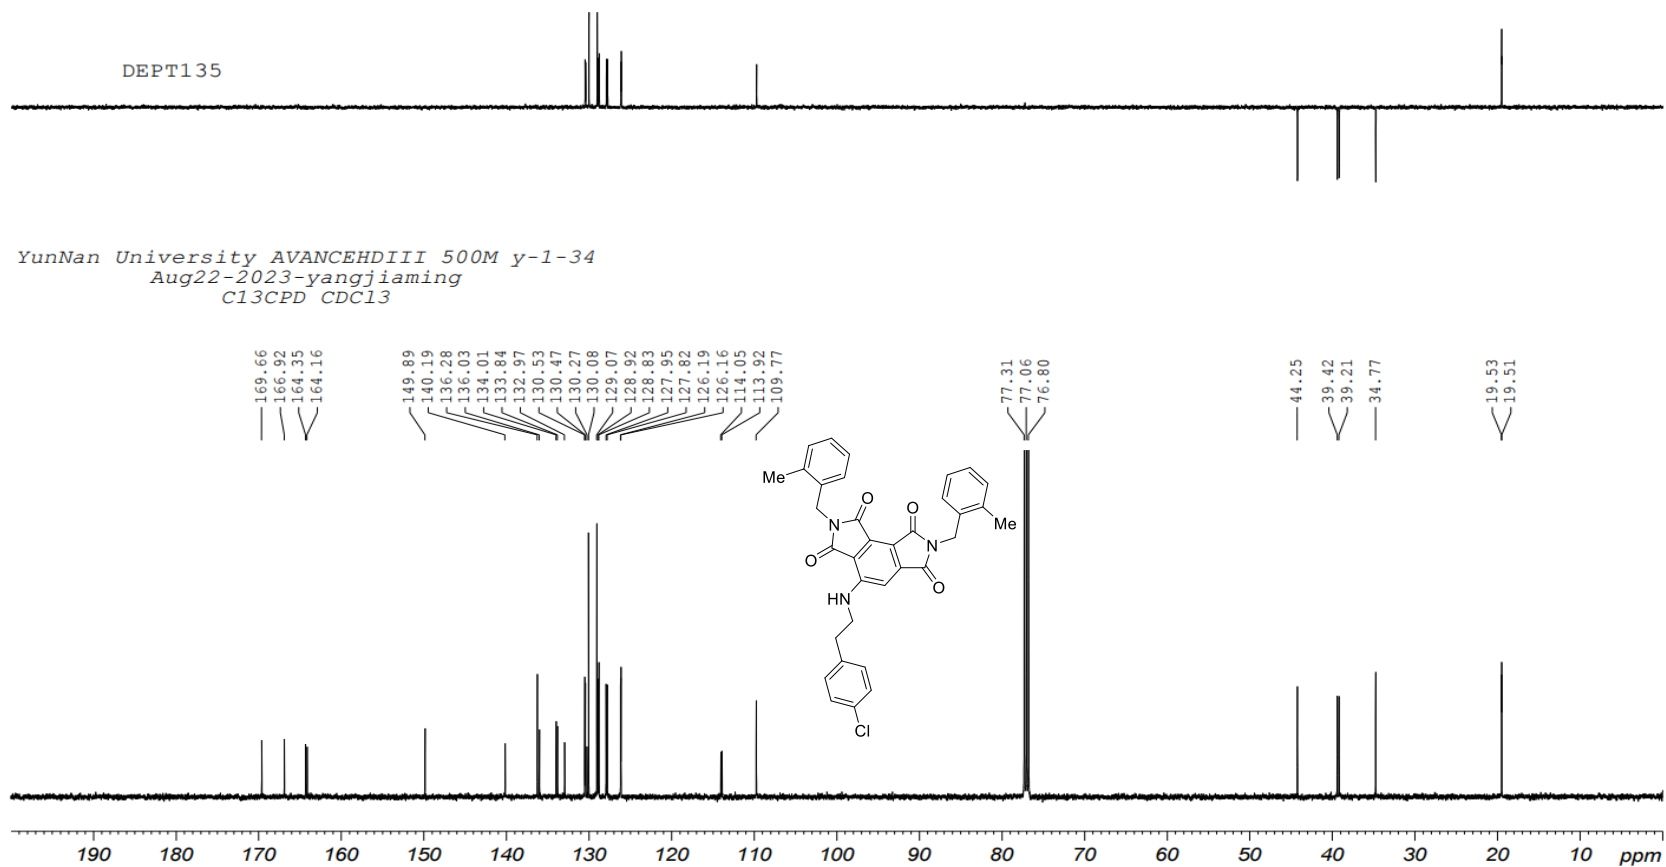

Figure S43.  $^{13}\text{C}$  NMR (125 MHz,  $\text{CDCl}_3$ ) spectra of compound 3t

YunNan University AVANCEHDIII 500M y-1-37  
Aug23-2023-yangjiaming  
PROTON CDC13

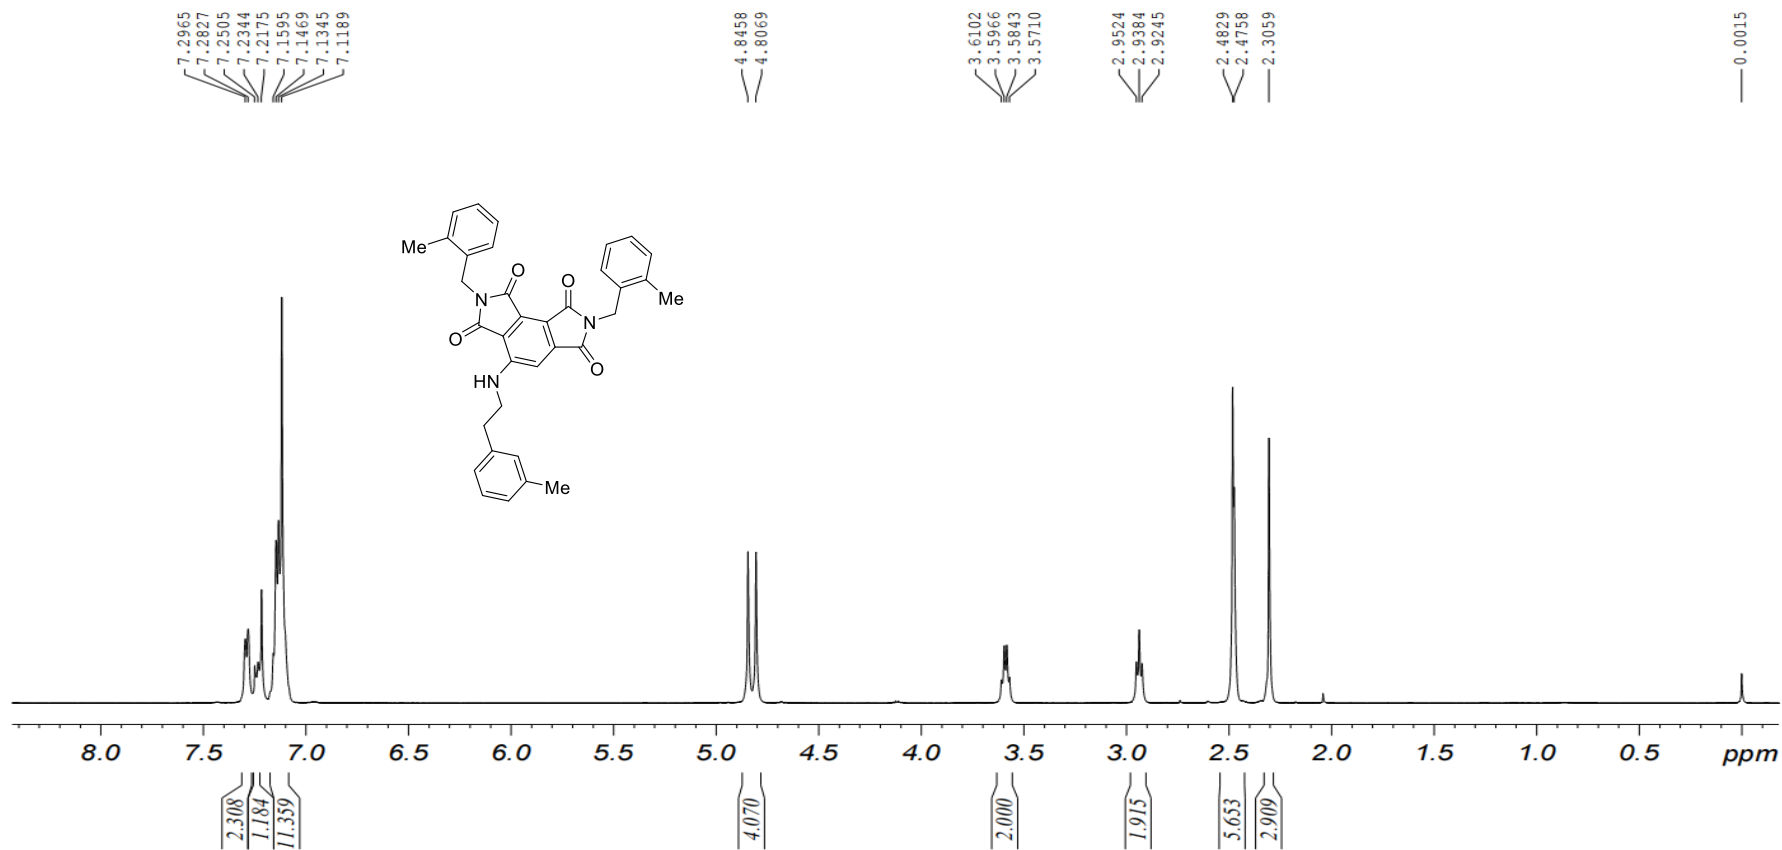

Figure S44.  $^1\text{H}$  NMR (500 MHz,  $\text{CDCl}_3$ ) spectra of compound 3u

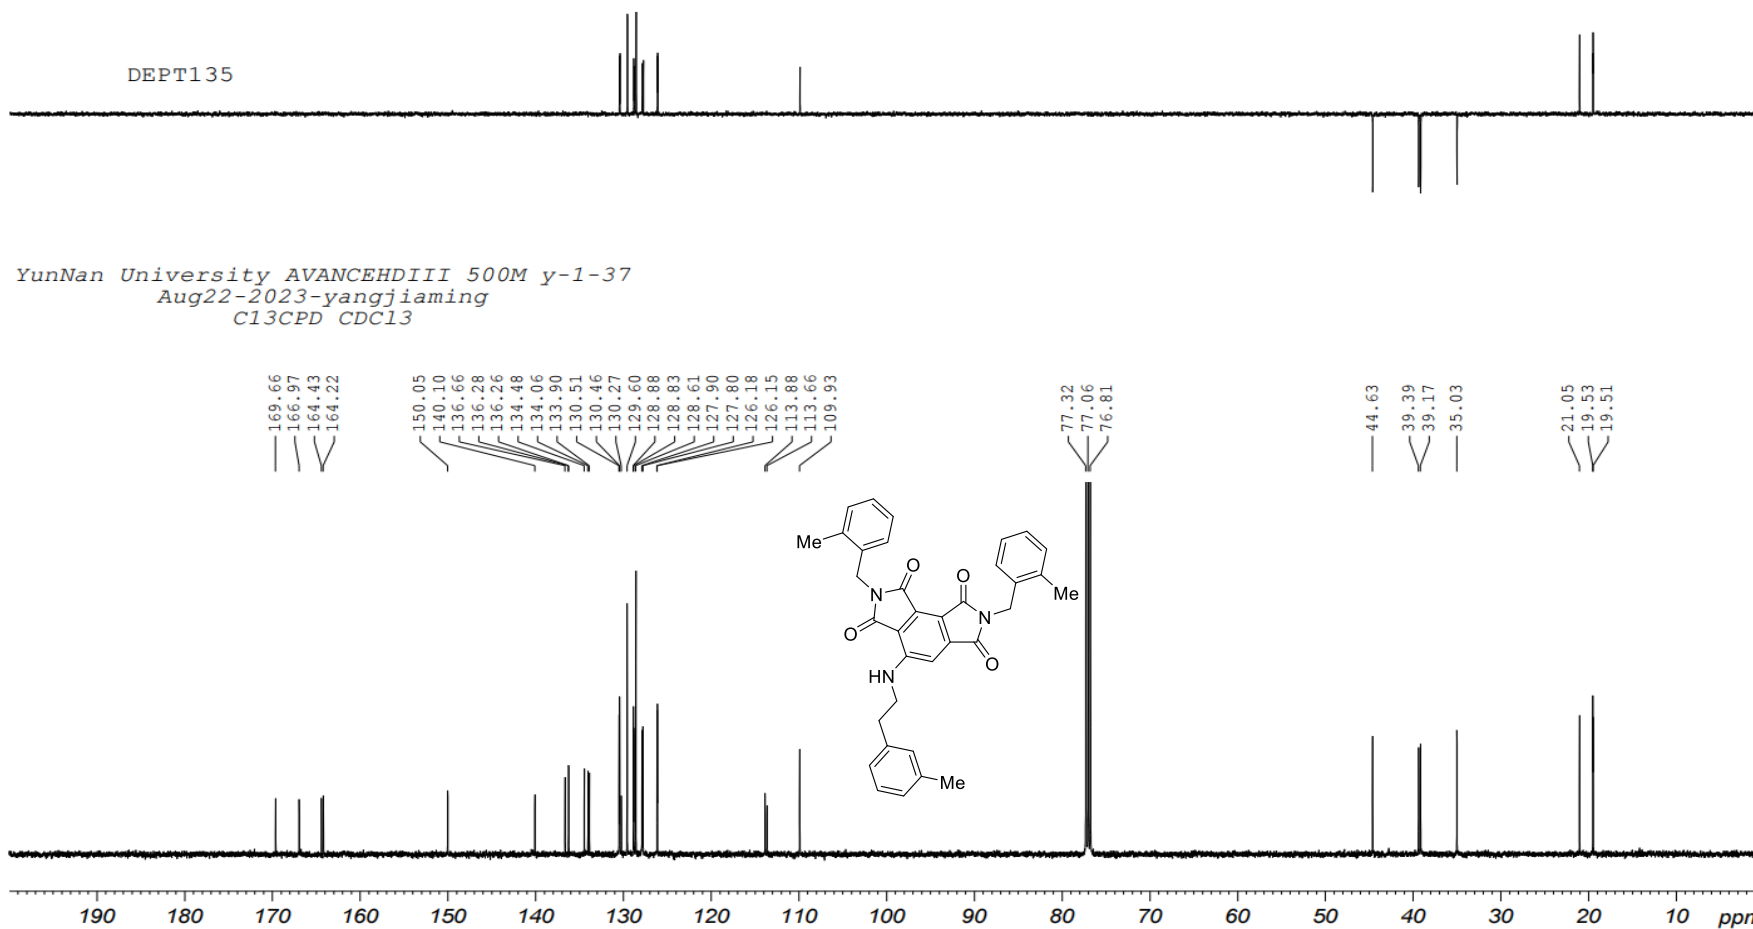

Figure S45.  $^{13}\text{C}$  NMR (125 MHz,  $\text{CDCl}_3$ ) spectra of compound **3u**

YunNan University AVANCEHDIII 500M y-1-33  
Aug23-2023-yangjiaming  
PROTON CDC13

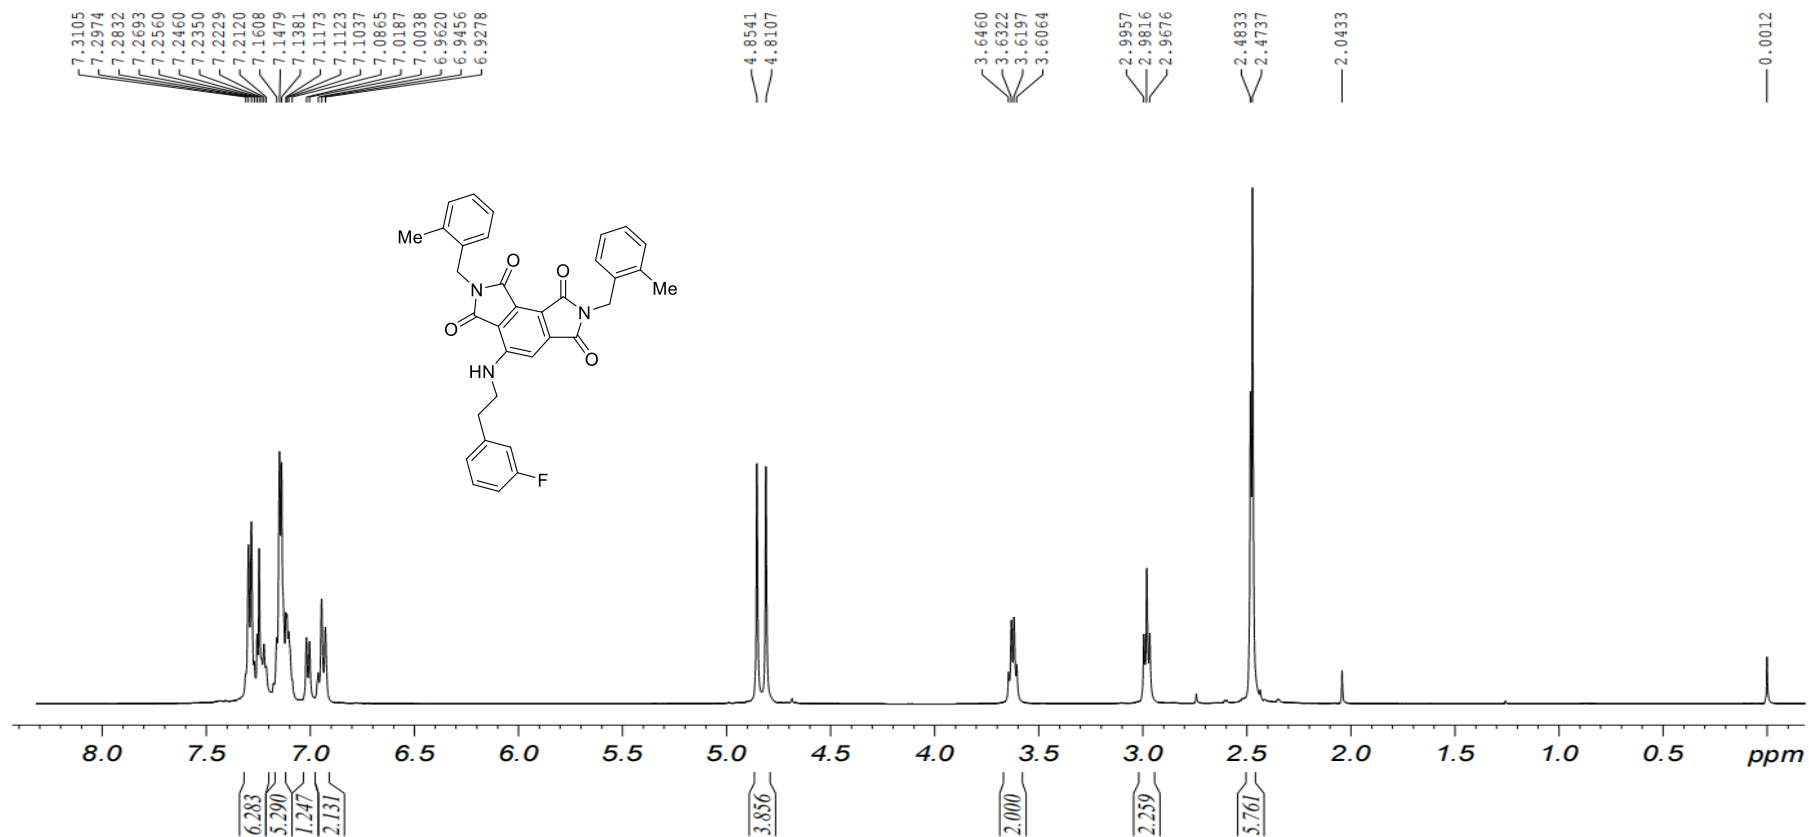

Figure S46.  $^1\text{H}$  NMR (500 MHz,  $\text{CDCl}_3$ ) spectra of compound 3v

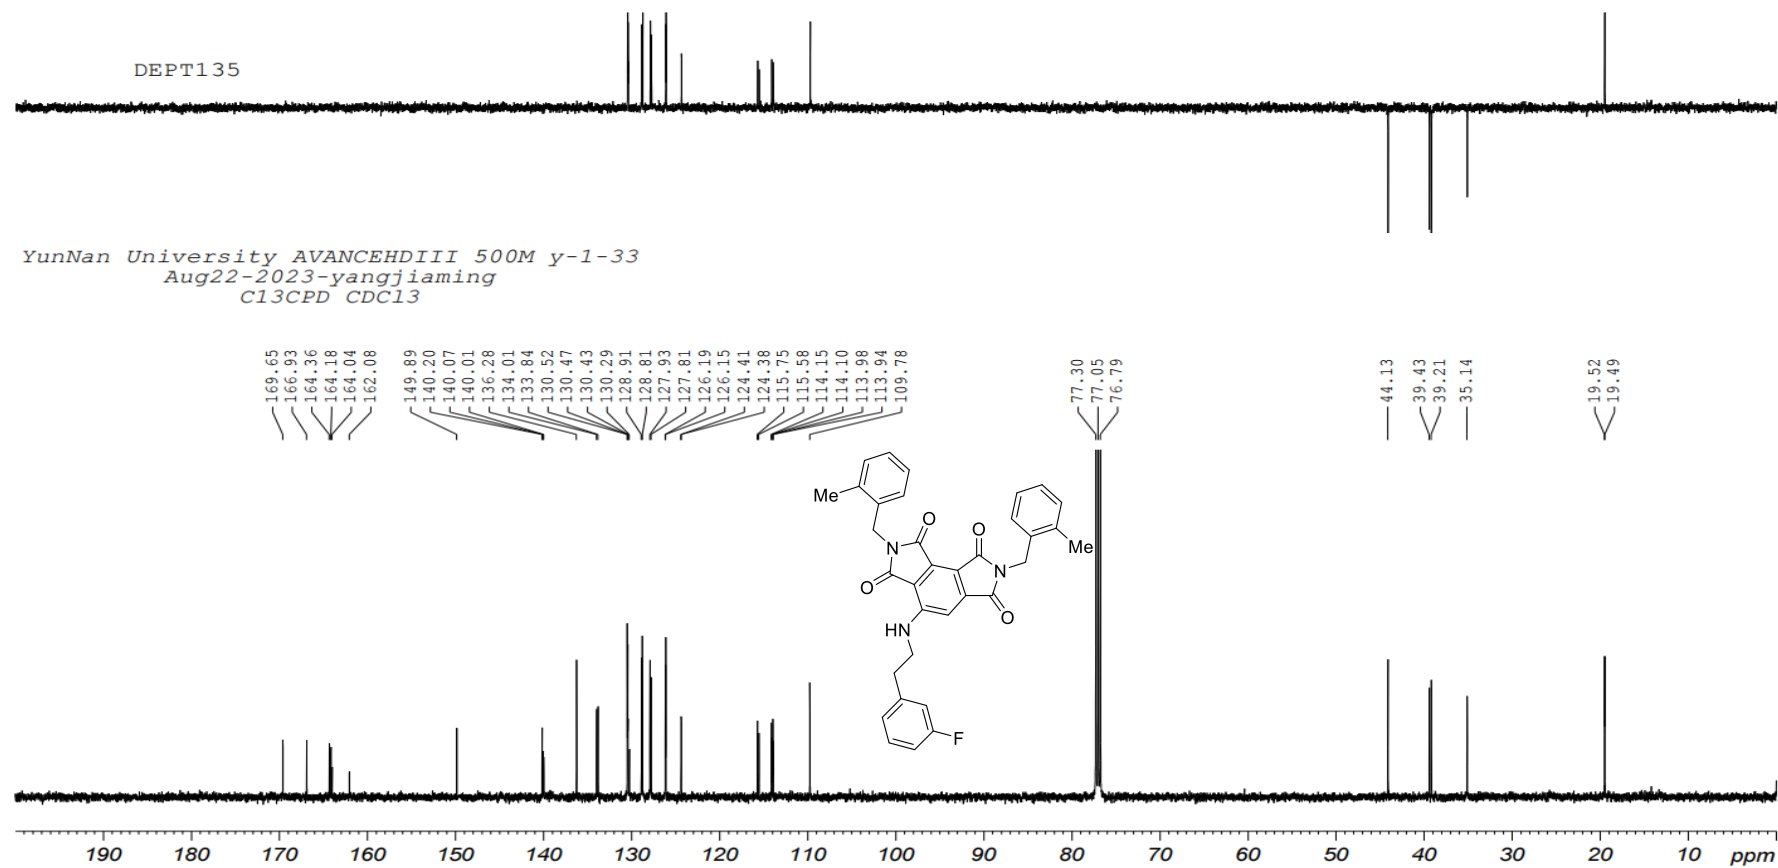

Figure S47.  $^{13}\text{C}$  NMR (125 MHz,  $\text{CDCl}_3$ ) spectra of compound **3v**

YunNan University AVANCEHDIII 500M y-1-33  
Aug22-2023-yangjiaming  
F19CPD CDCl3

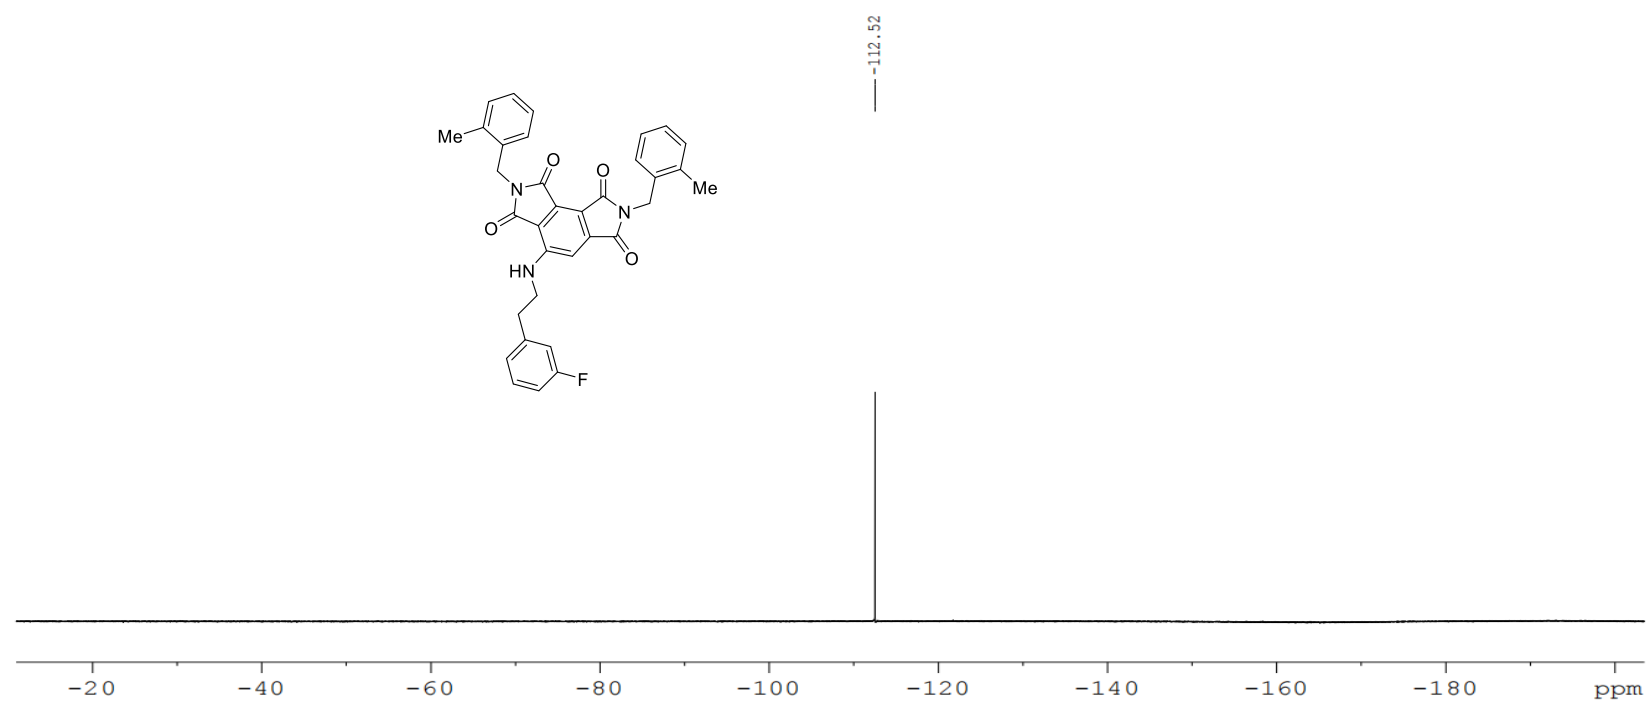

**Figure S48.**  $^{19}\text{F}$  NMR (470 MHz,  $\text{CDCl}_3$ ) spectra of compound **3v**



YunNan University AVANCEHDIII 500M y-1-14  
Jul26-2023-yangjiaming  
PROTON CDCl<sub>3</sub>

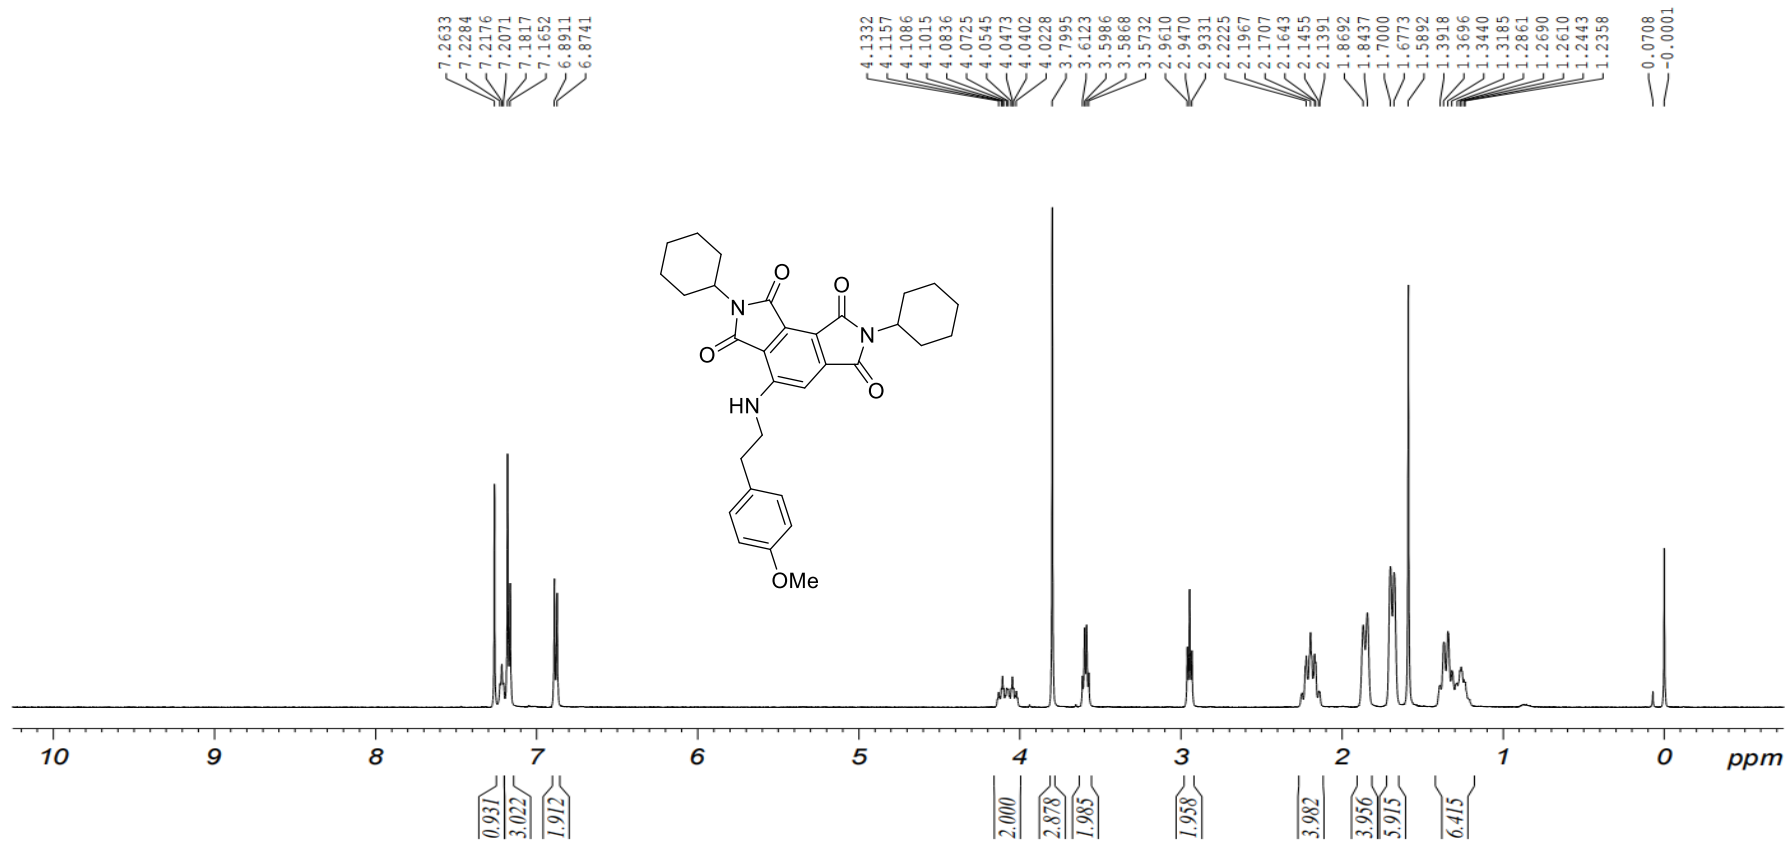

Figure S49. <sup>1</sup>H NMR (500 MHz, CDCl<sub>3</sub>) spectra of compound 3w

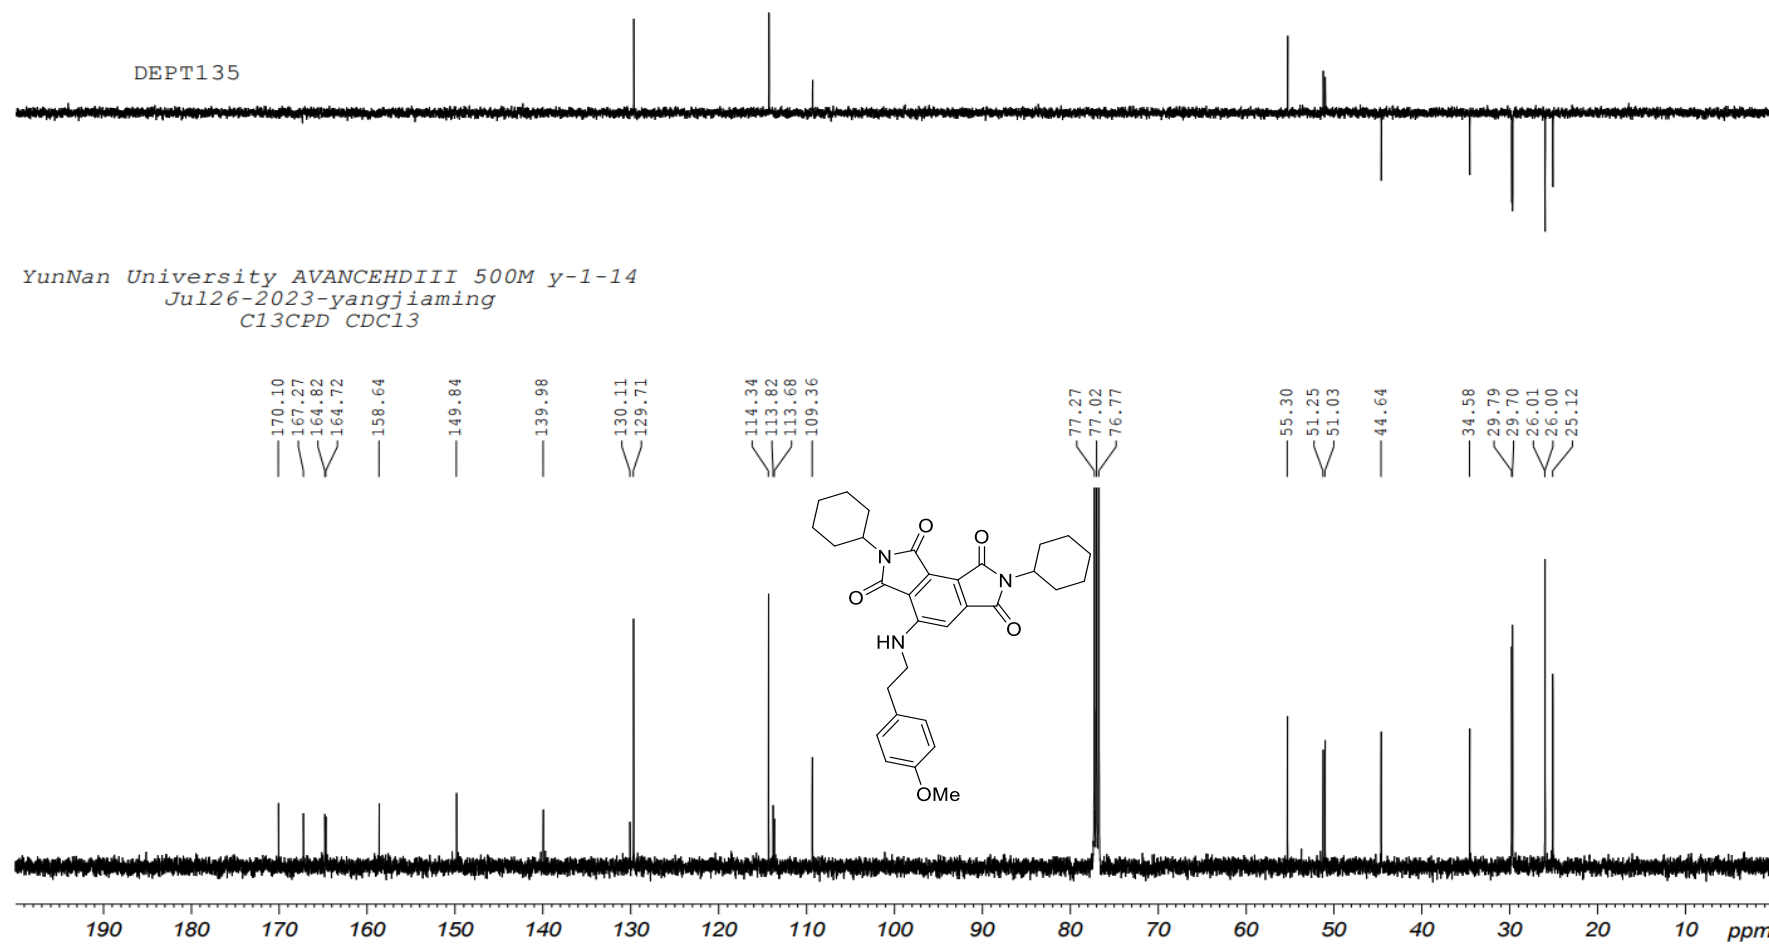

Figure S50.  $^{13}\text{C}$  NMR (125 MHz,  $\text{CDCl}_3$ ) spectra of compound 3w

YunNan University AVANCEHDIII 500M y-1-12  
Jul26-2023-yangjiaming  
PROTON CDCl3

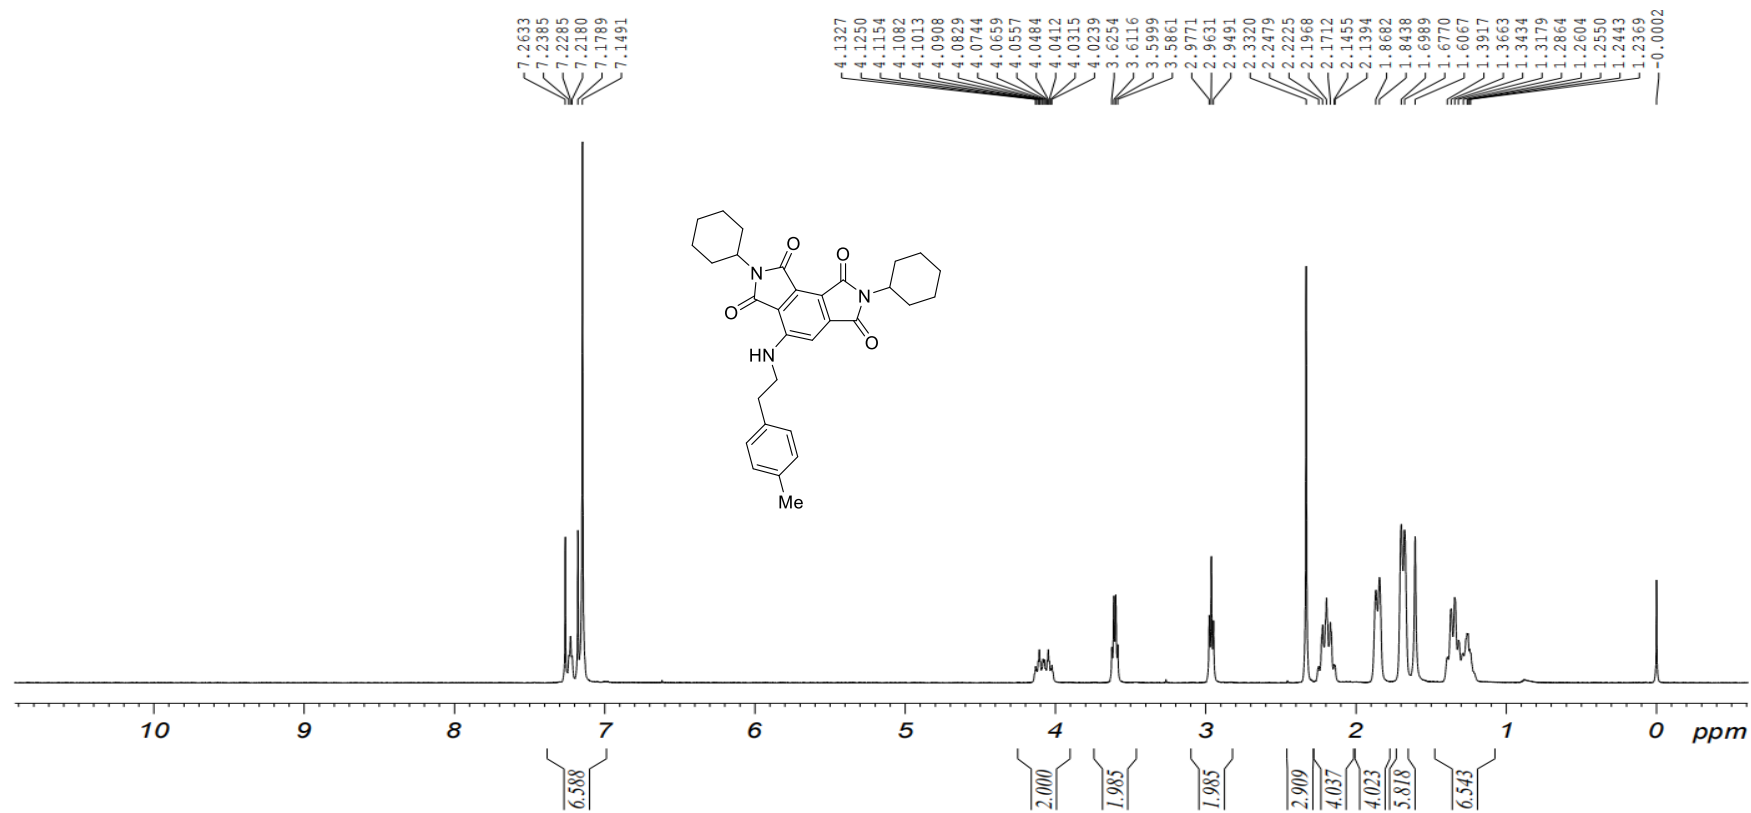

Figure S51.  $^1\text{H}$  NMR (500 MHz,  $\text{CDCl}_3$ ) spectra of compound 3x

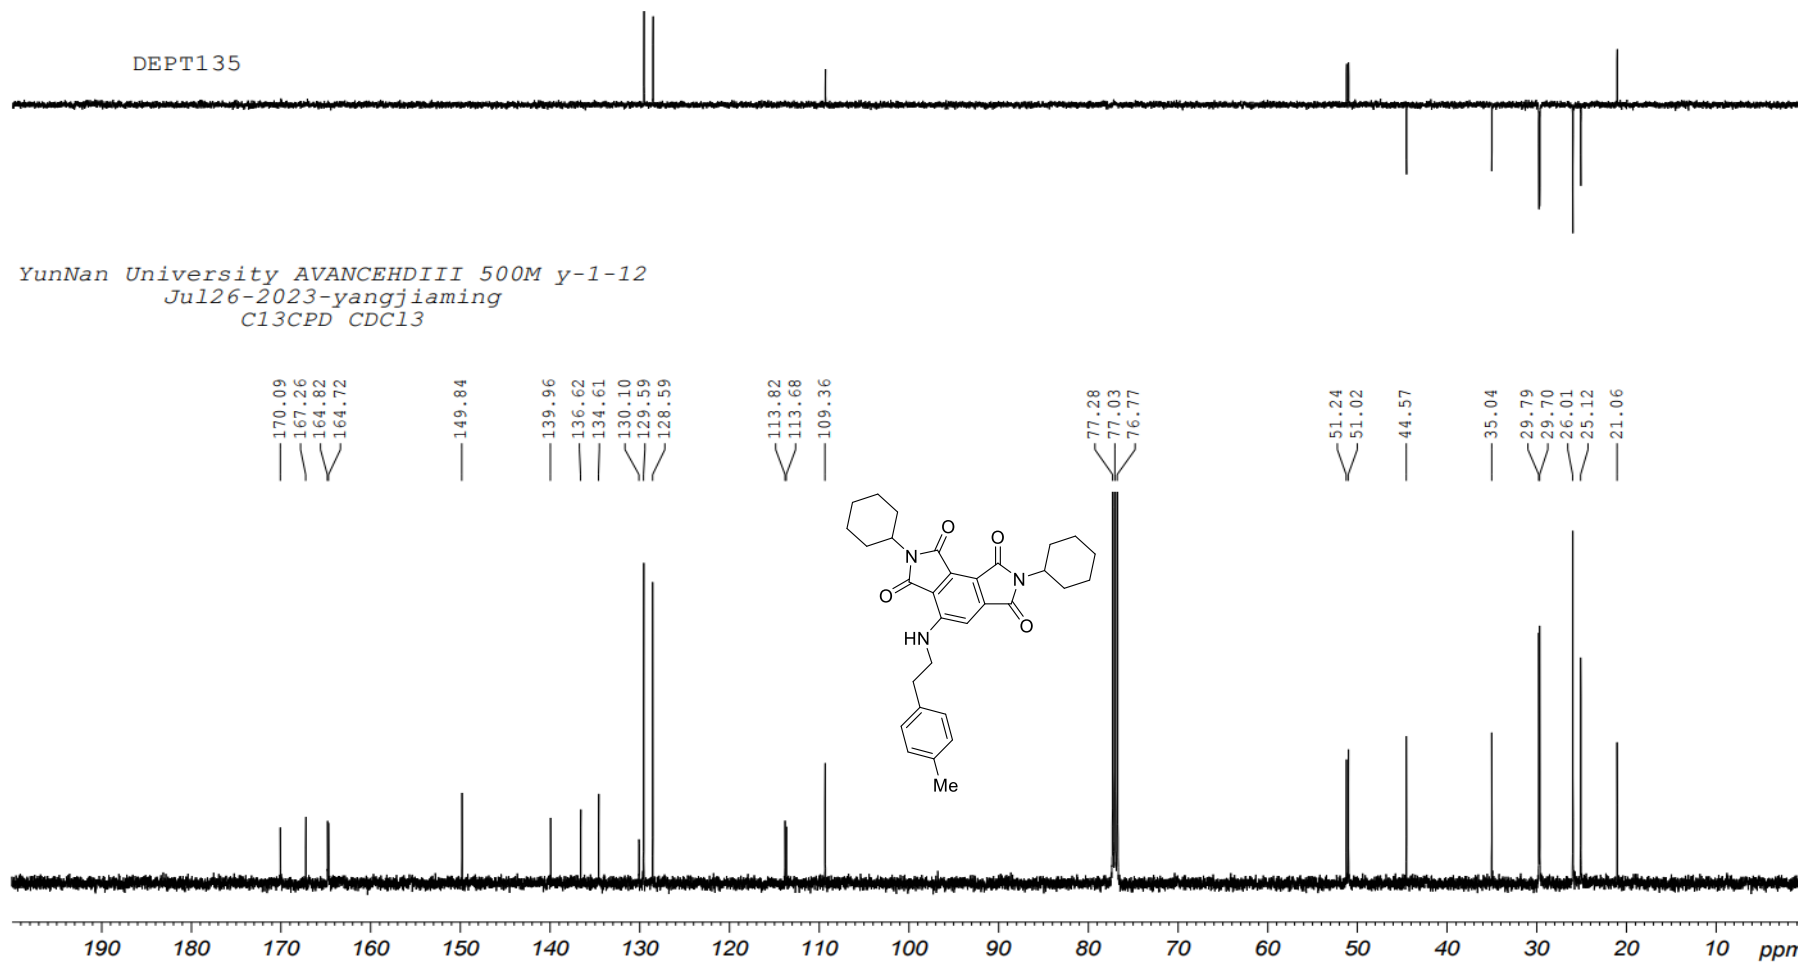

Figure S52.  $^{13}\text{C}$  NMR (125 MHz,  $\text{CDCl}_3$ ) spectra of compound 3x

YunNan University AVANCEHDIII 500M y-1-11  
Jul24-2023-yangjiaming  
PROTON CDCl3

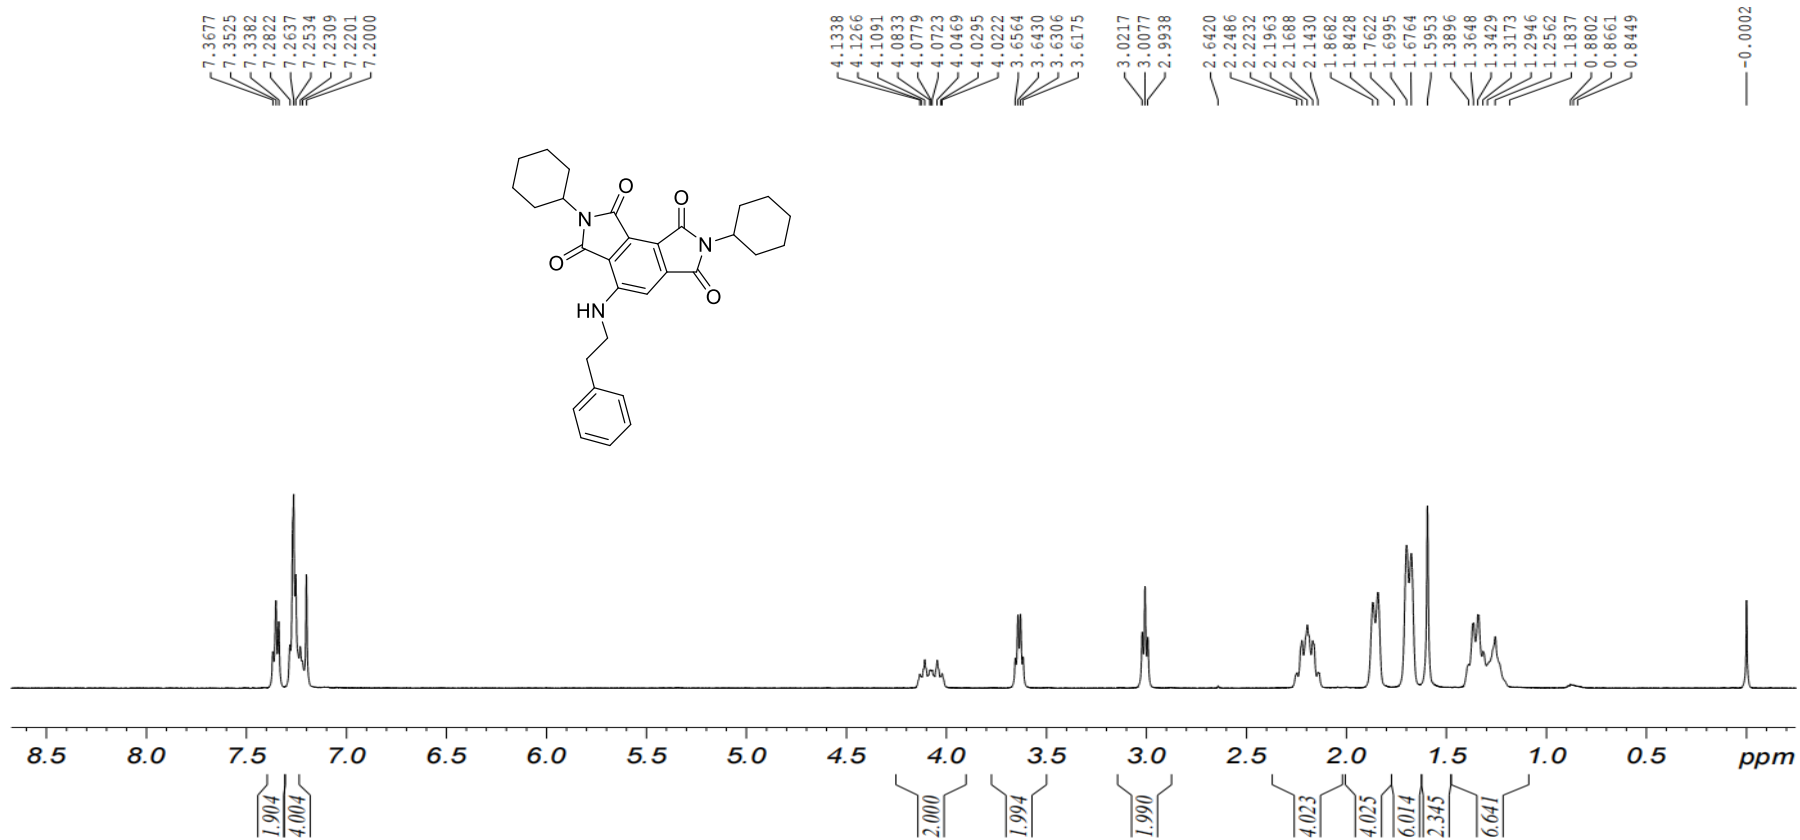

Figure S53. <sup>1</sup>H NMR (500 MHz, CDCl<sub>3</sub>) spectra of compound **3y**

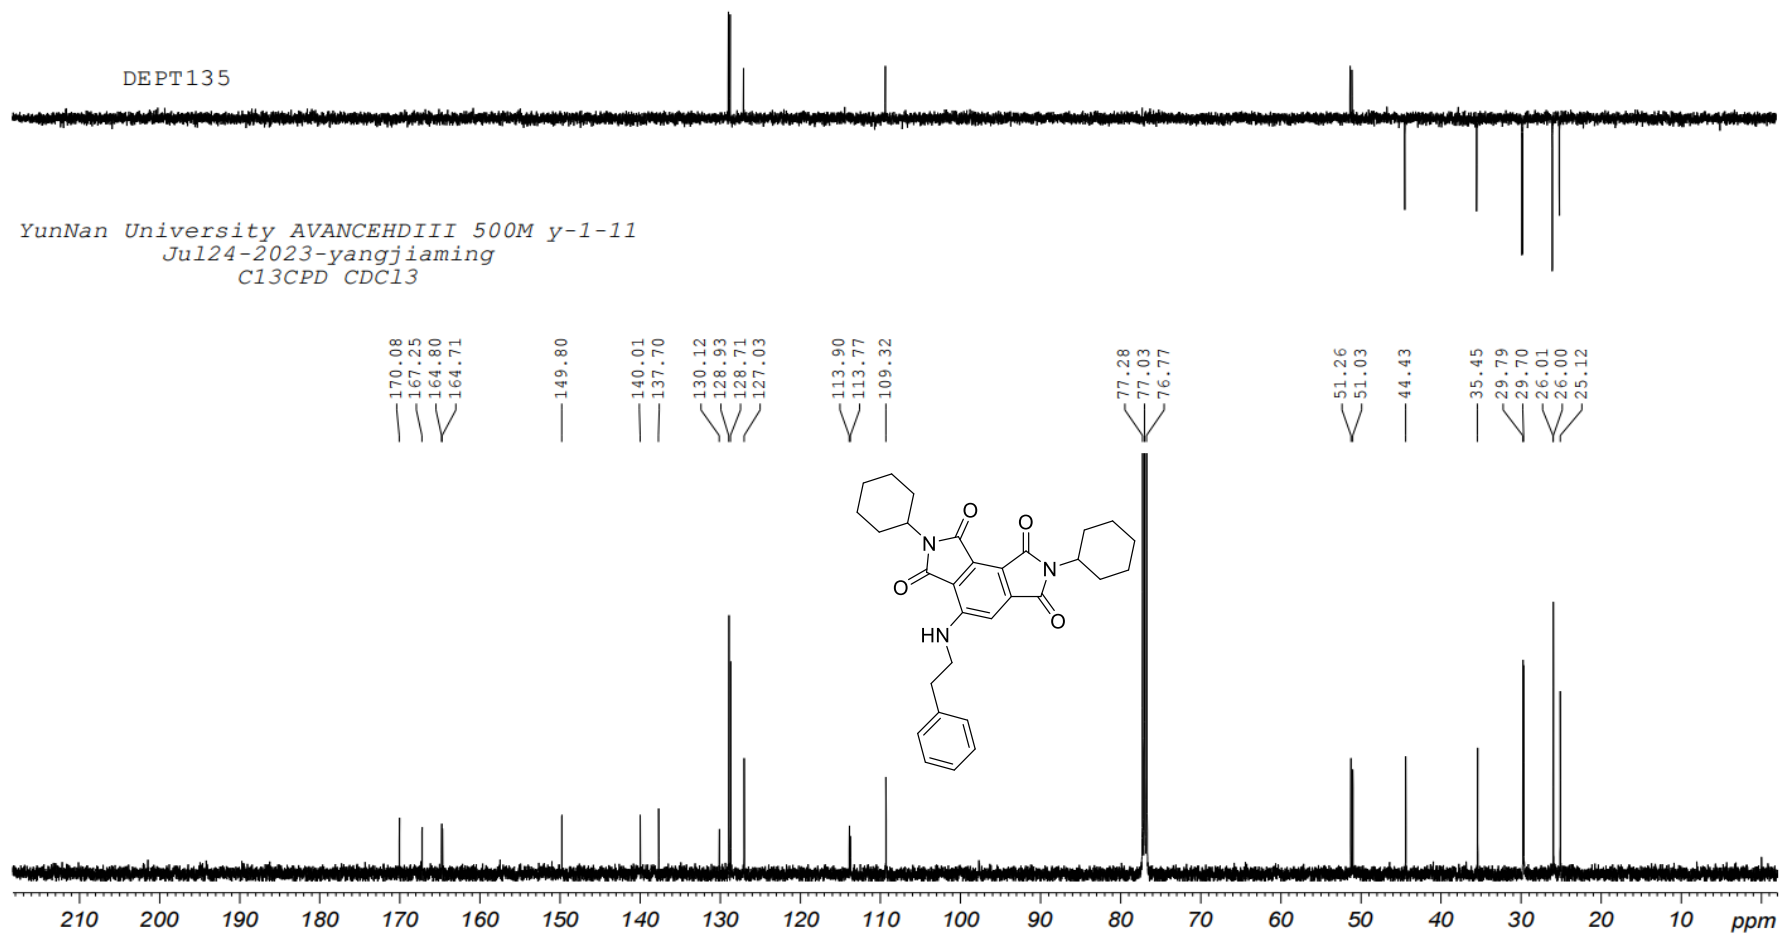

Figure S54.  $^{13}\text{C}$  NMR (125 MHz,  $\text{CDCl}_3$ ) spectra of compound **3y**

YunNan University AVANCEHDIII 500M y-1-10  
Jul25-2023-yangjiaming  
PROTON CDC13

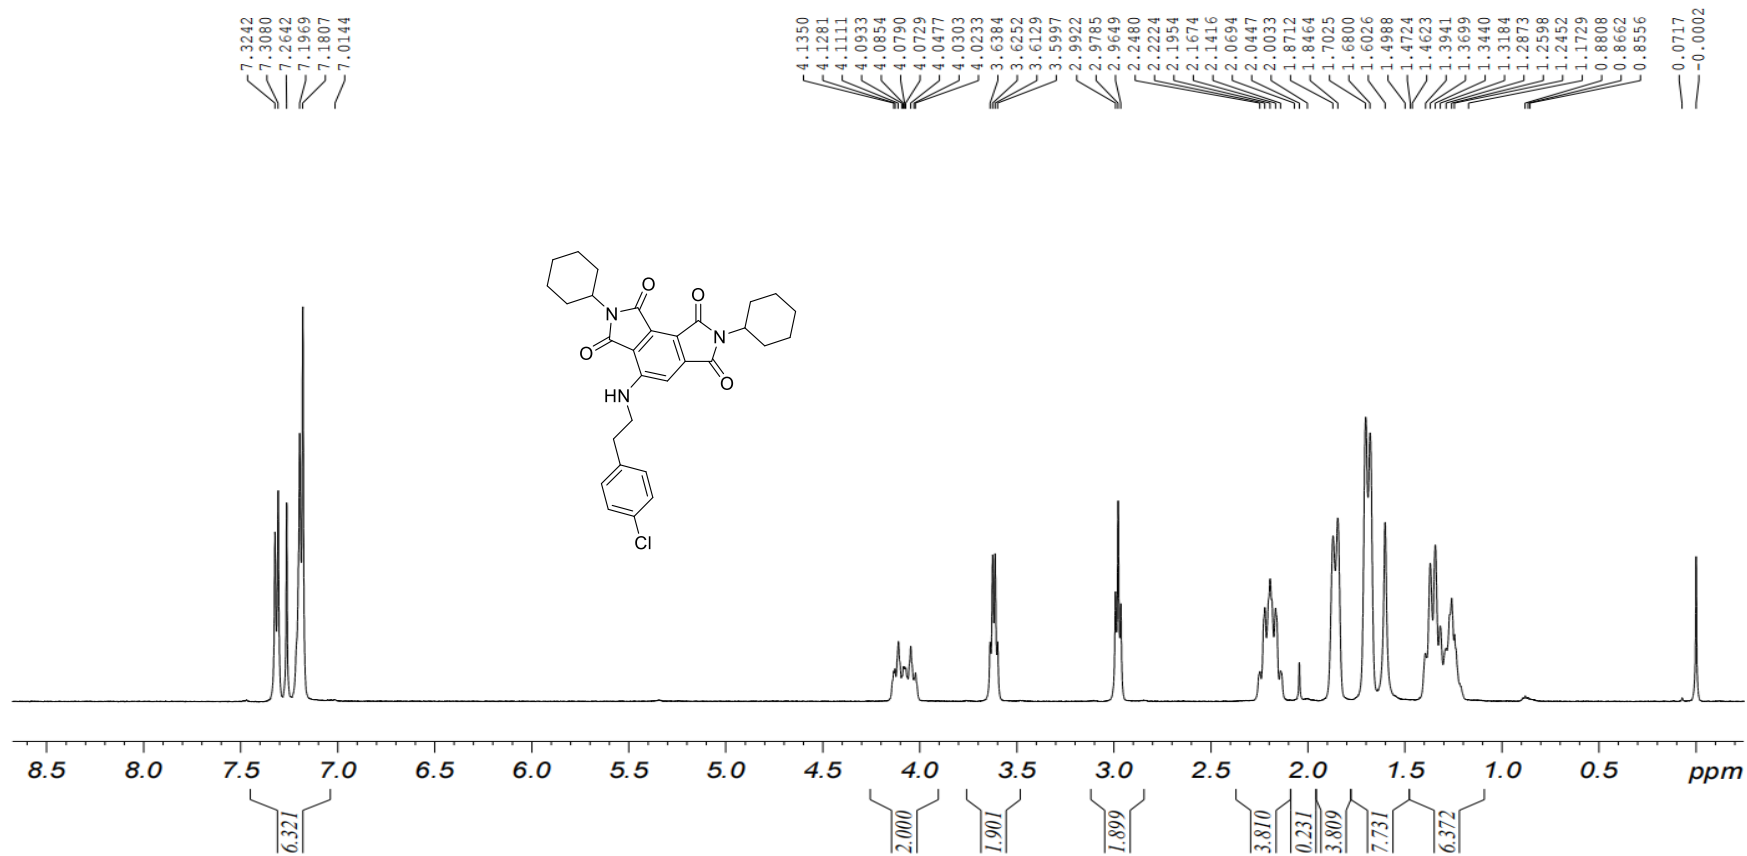

Figure S55. <sup>1</sup>H NMR (500 MHz, CDCl<sub>3</sub>) spectra of compound **3z**

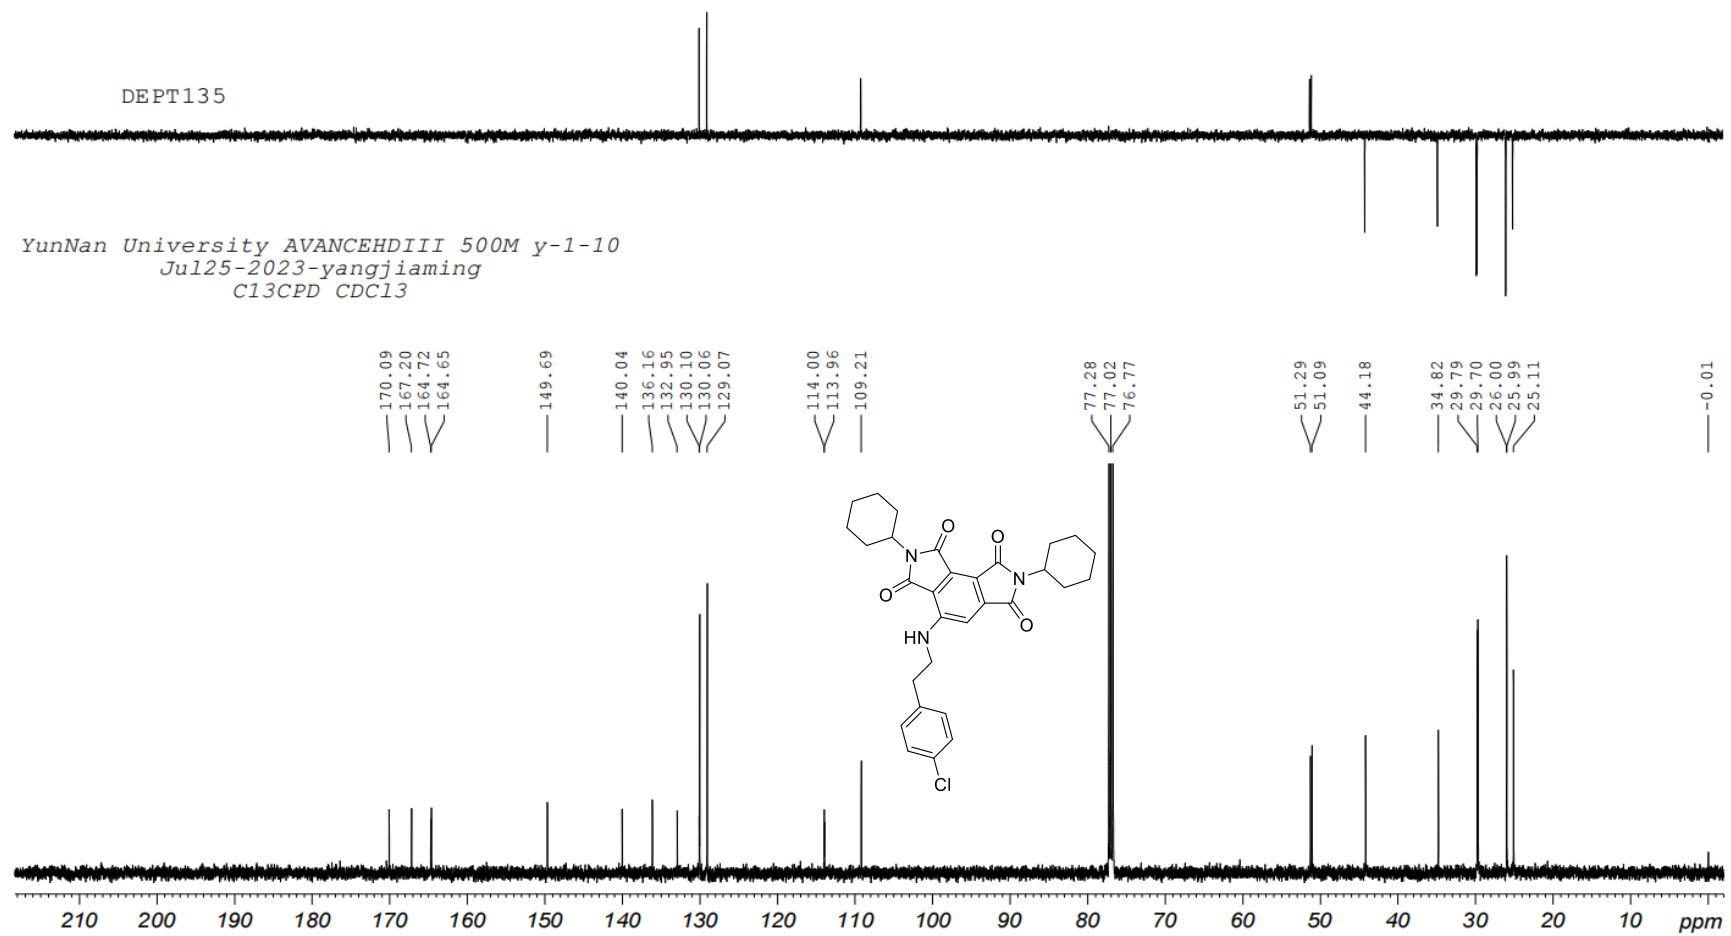

Figure S56.  $^{13}\text{C}$  NMR (125 MHz,  $\text{CDCl}_3$ ) spectra of compound 3z



YunNan University AVANCEHDIII 500M y-1-13  
Jul26-2023-yangjiaming  
PROTON CDCl3

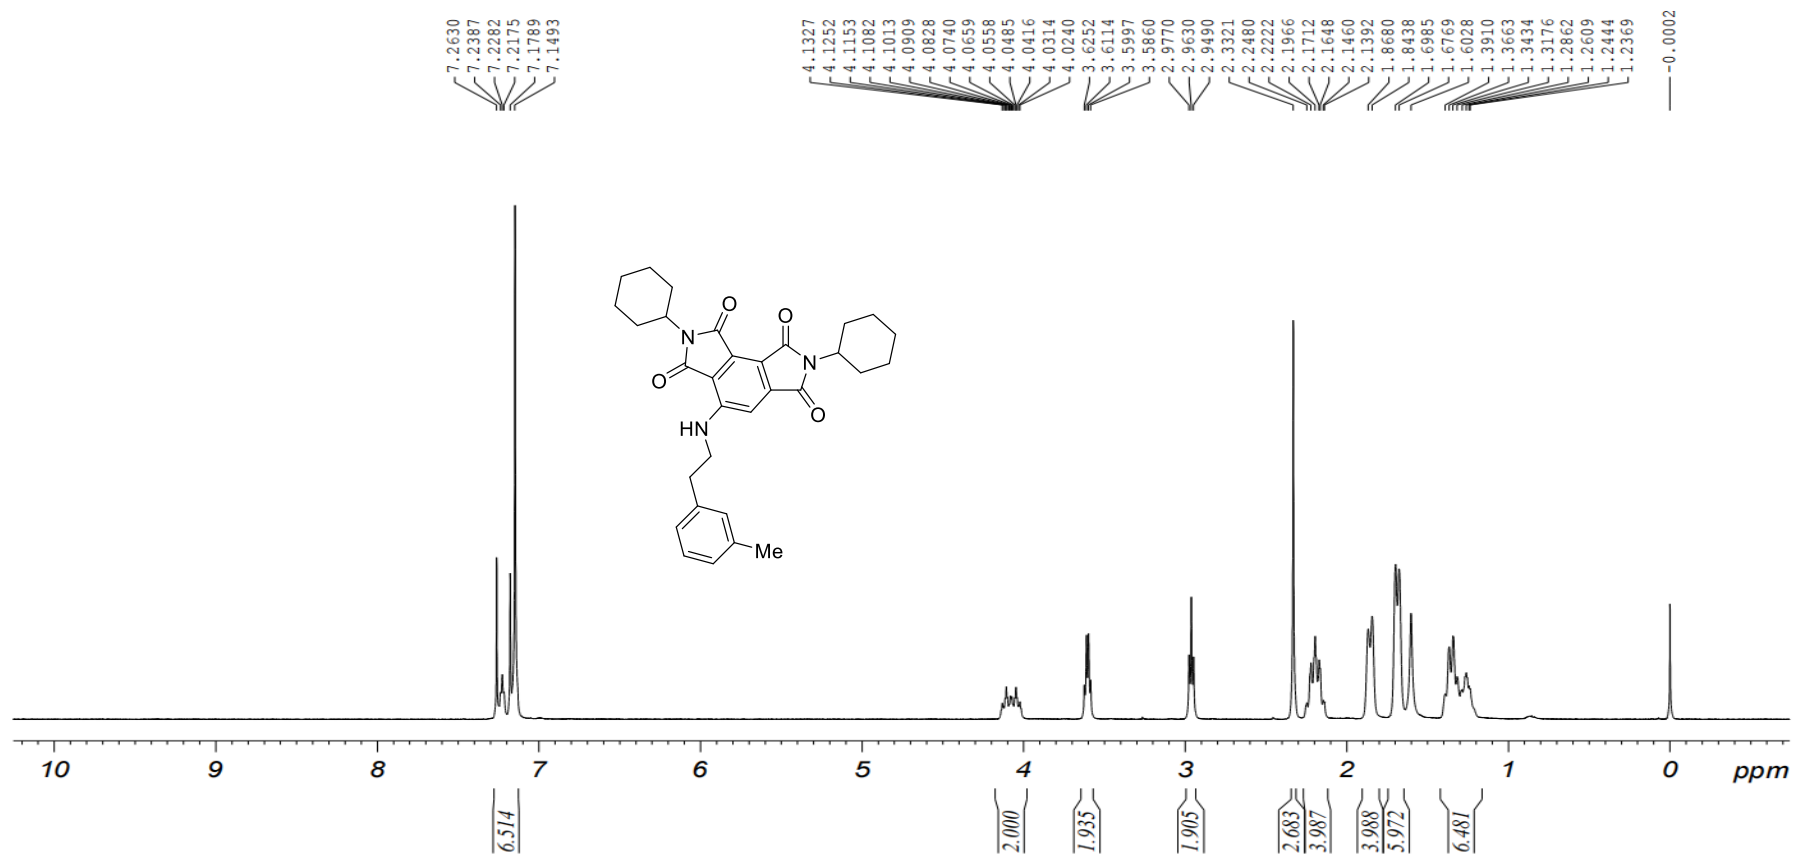

Figure S57.  $^1\text{H}$  NMR (500 MHz,  $\text{CDCl}_3$ ) spectra of compound 3a'

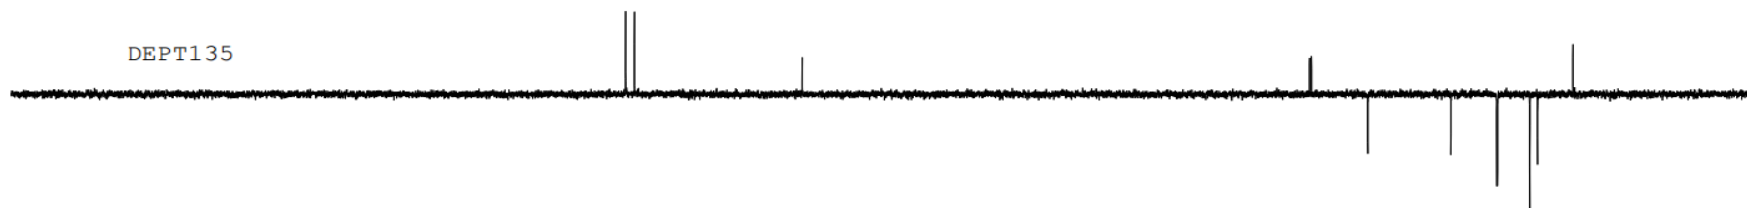

YunNan University AVANCEHDIII 500M y-1-13  
 Jul26-2023-yangjiaming  
 C13CPD CDCl3

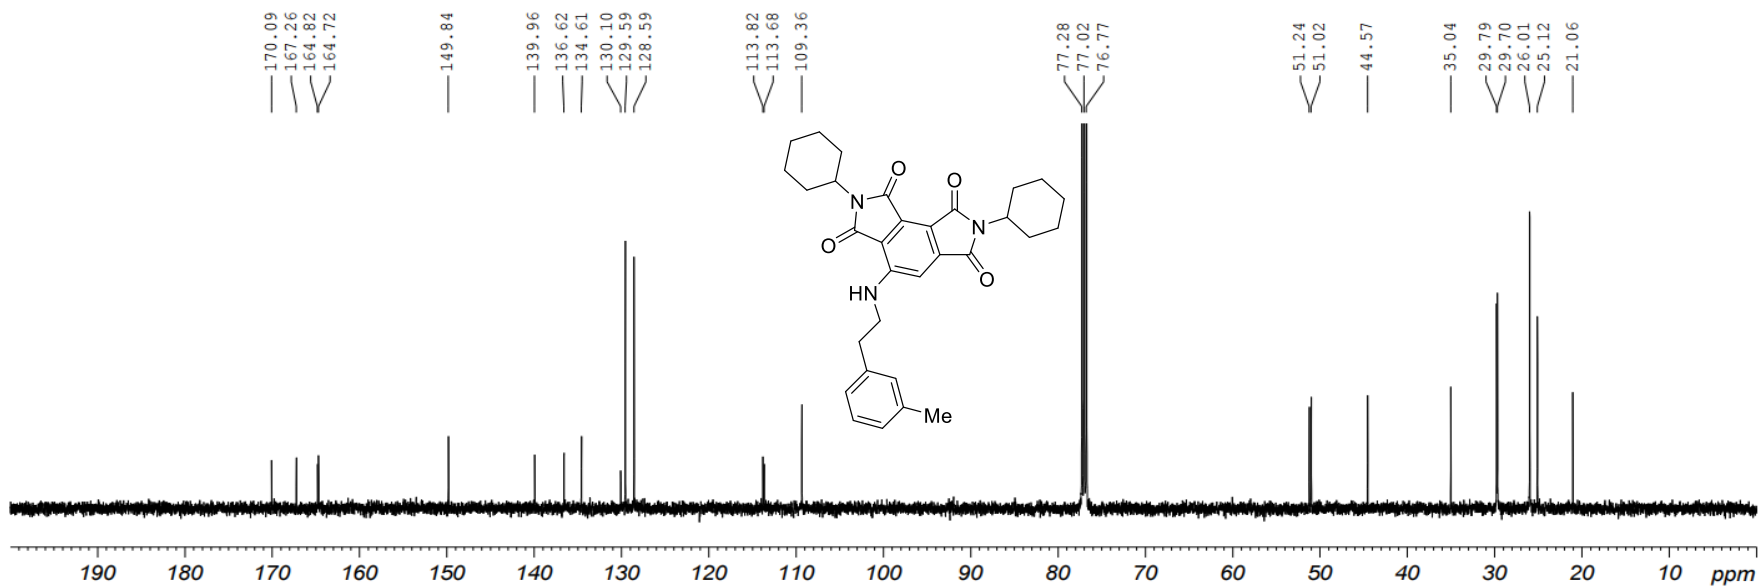

Figure S58.  $^{13}\text{C}$  NMR (125 MHz,  $\text{CDCl}_3$ ) spectra of compound 3a'

YunNan University AVANCEHDIII 500M y-1-9  
Jul25-2023-yangjiaming  
PROTON CDCl<sub>3</sub>

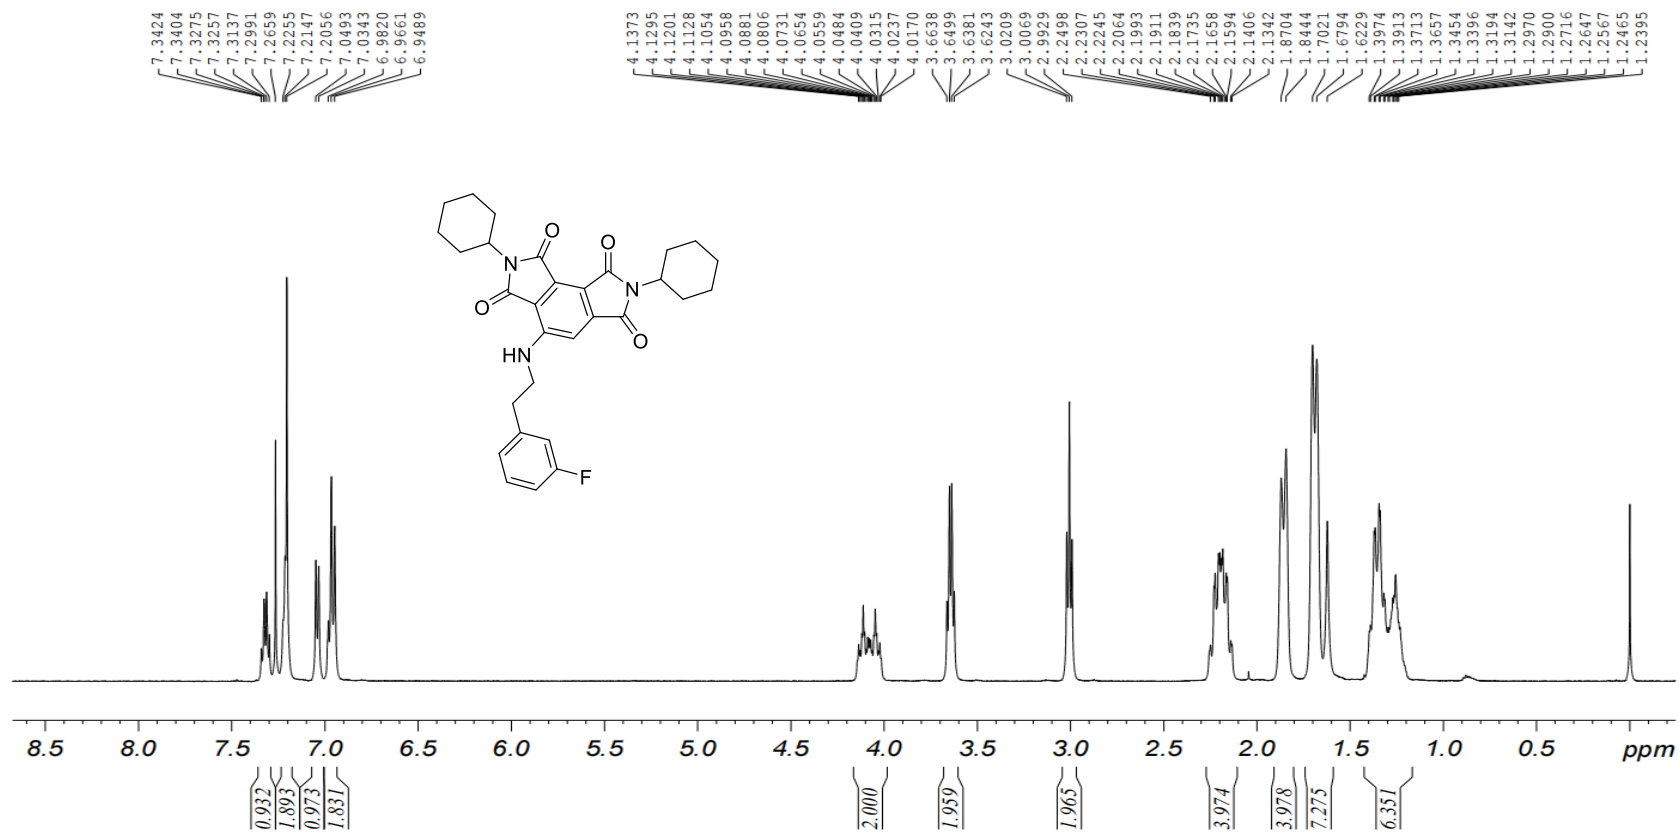

Figure S59. <sup>1</sup>H NMR (500 MHz, CDCl<sub>3</sub>) spectra of compound **3b'**

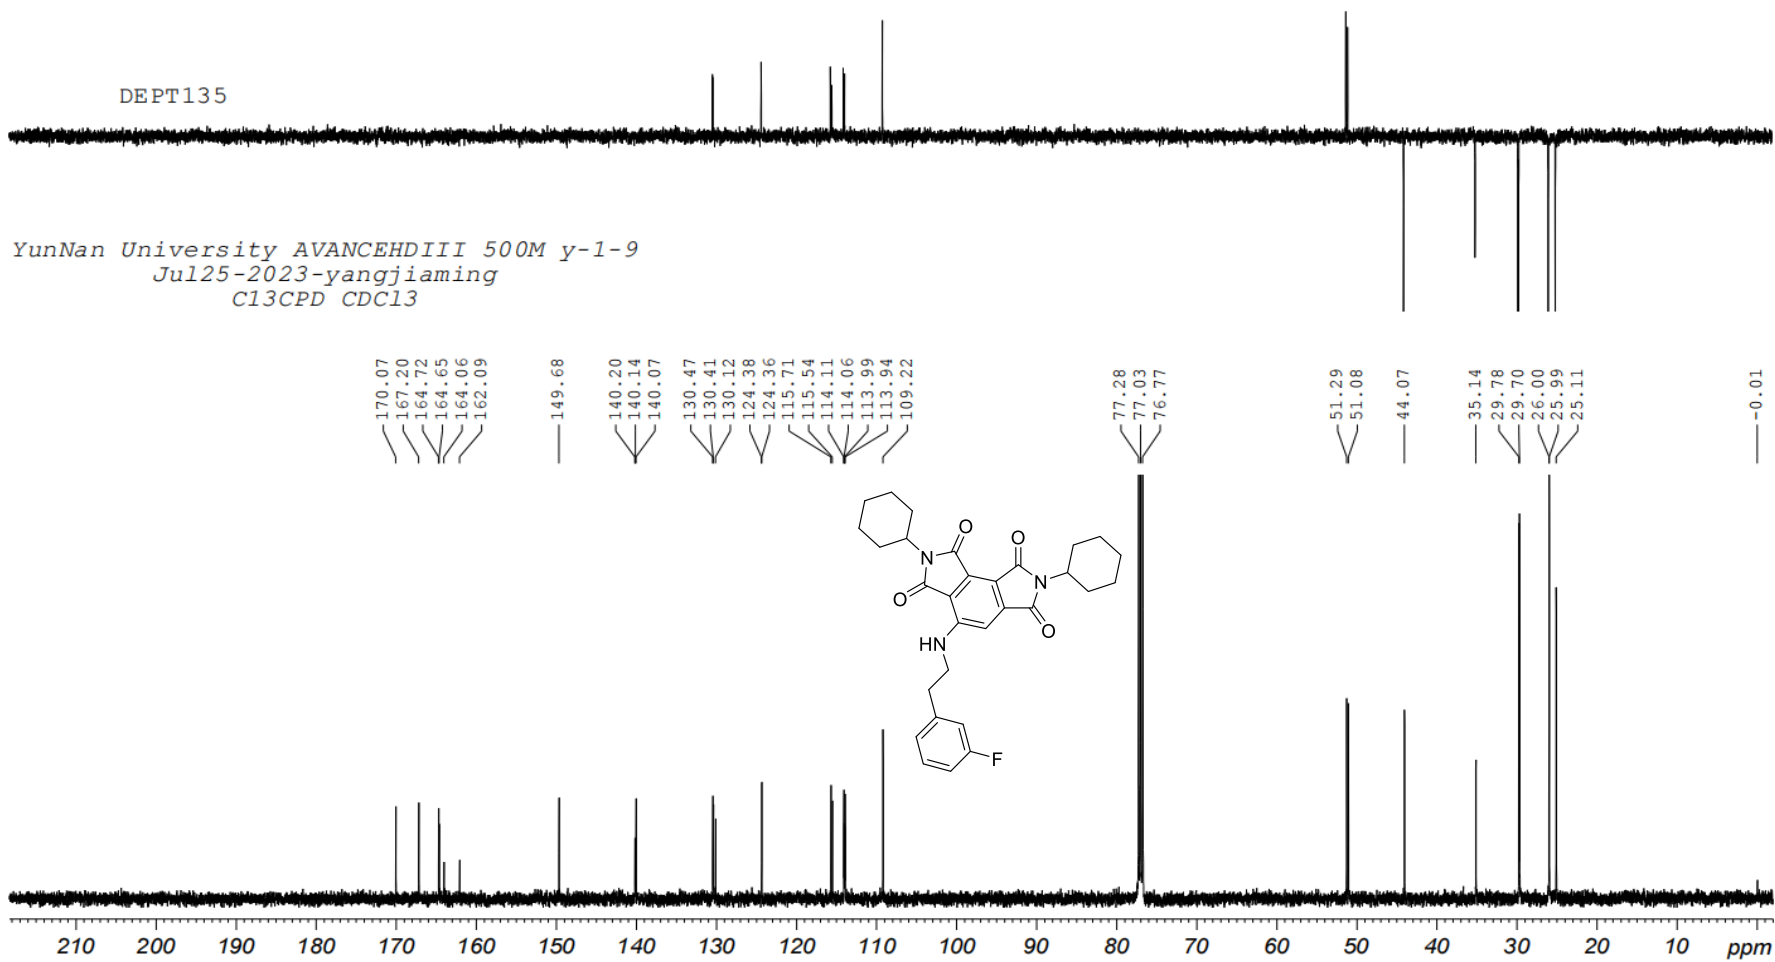

Figure S60.  $^{13}\text{C}$  NMR (125 MHz,  $\text{CDCl}_3$ ) spectra of compound **3b'**

YunNan University AVANCEHDIII 500M y-1-9  
Jul25-2023-yangjiaming  
F19CPD CDC13

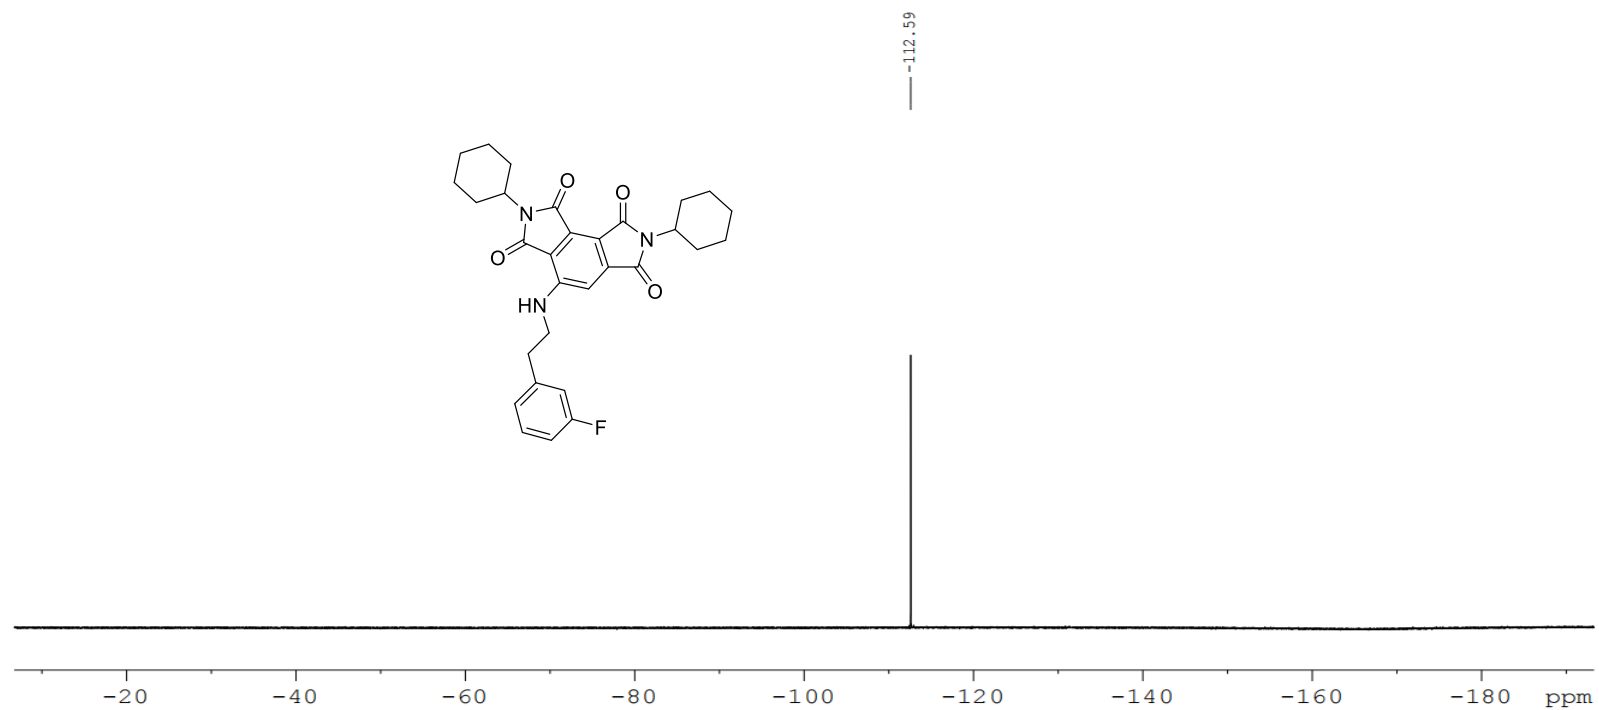

**Figure S61.**  $^{19}\text{F}$  NMR (470 MHz,  $\text{CDCl}_3$ ) spectra of compound **3b'**

YUNNAN UNIVERSITY ASCEND AVIIIHD600 y-1-26  
Sep01-2023-yangjiaming  
PROTON DMSO

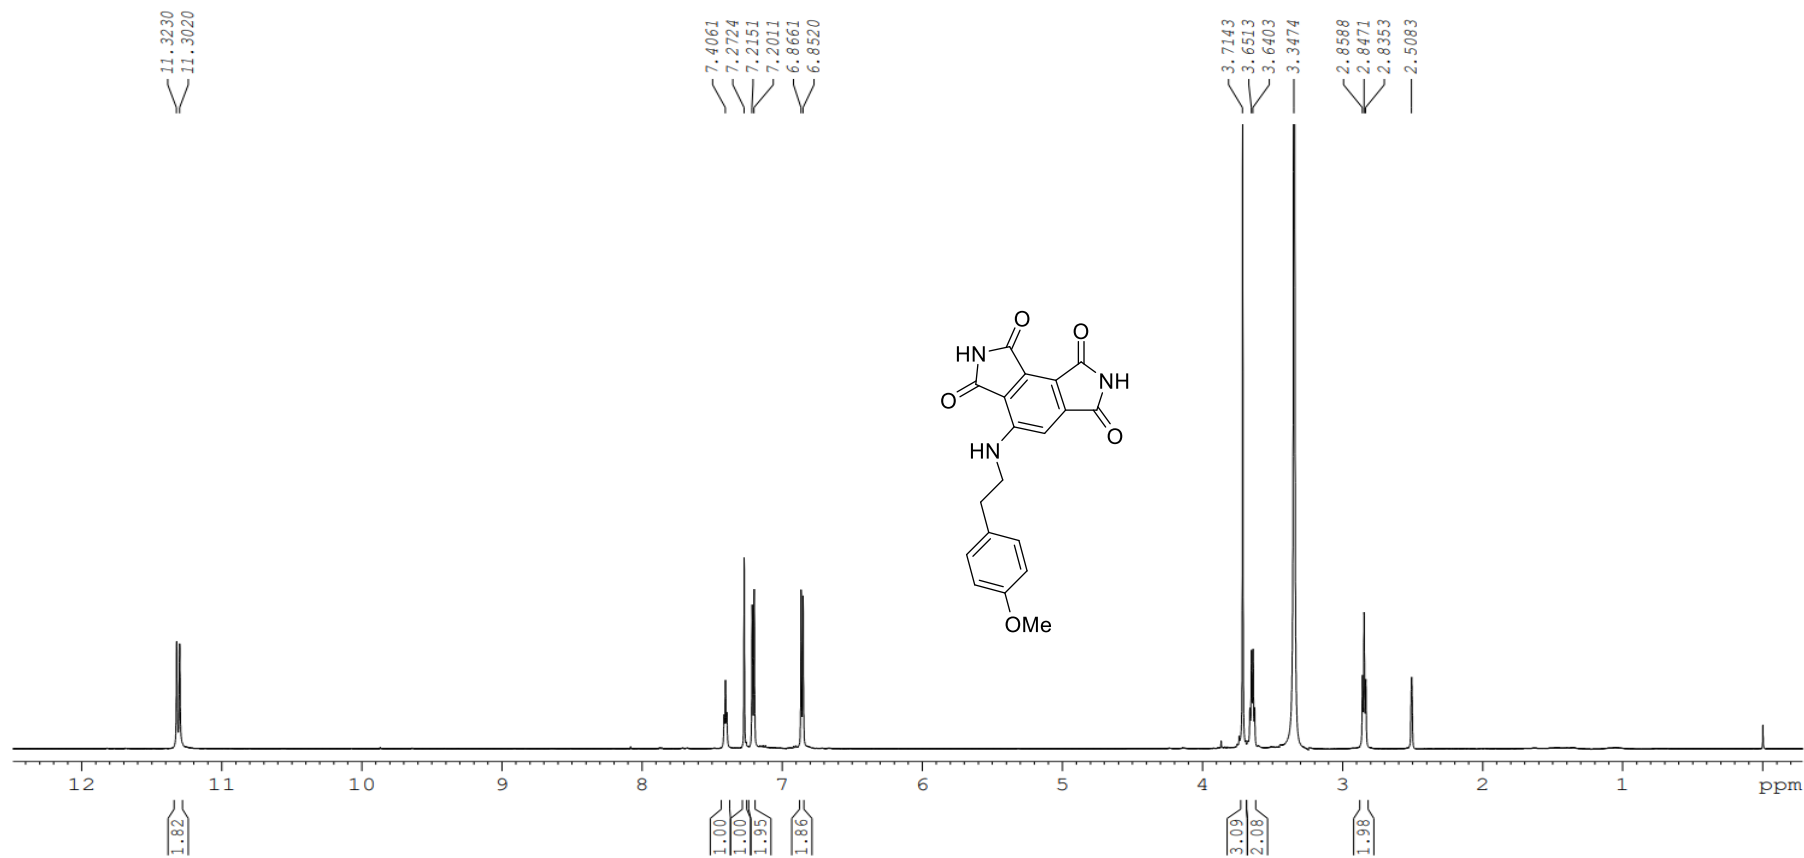

Figure S62.  $^1\text{H}$  NMR (600 MHz,  $\text{DMSO-}d_6$ ) spectra of compound 3c'

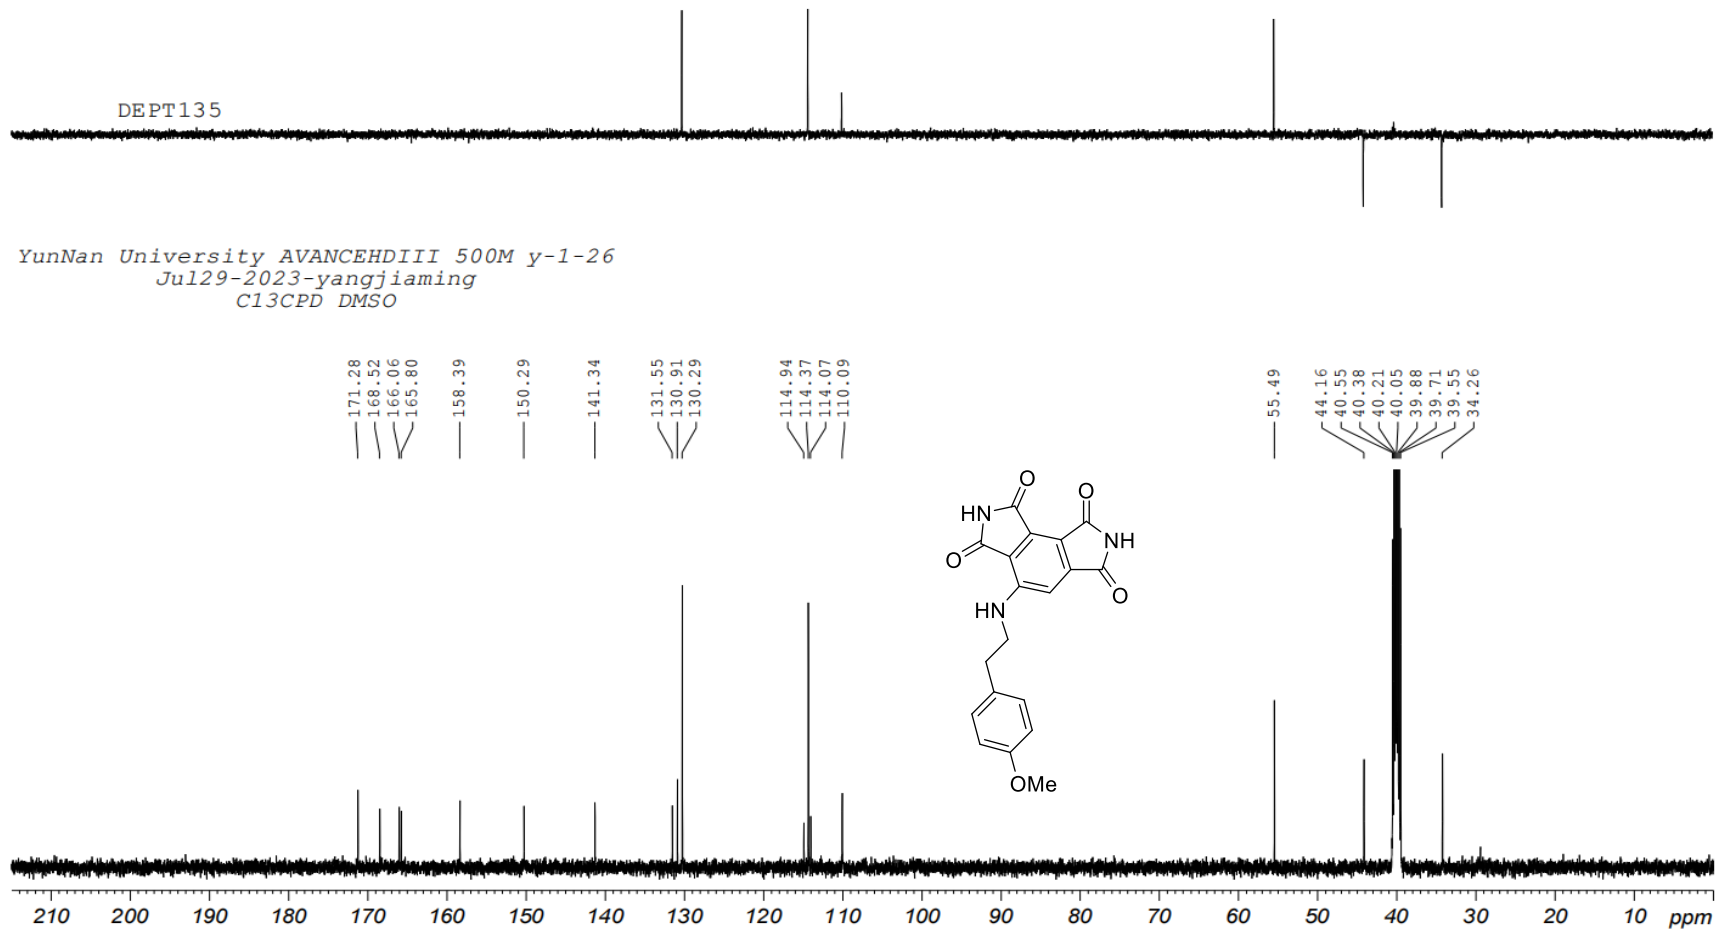

Figure S63. <sup>13</sup>C NMR (150 MHz, DMSO-*d*<sub>6</sub>) spectra of compound 3c'

YunNan University AVANCEHDIII 500M y-1-24  
Jul28-2023-yangjiaming  
PROTON DMSO

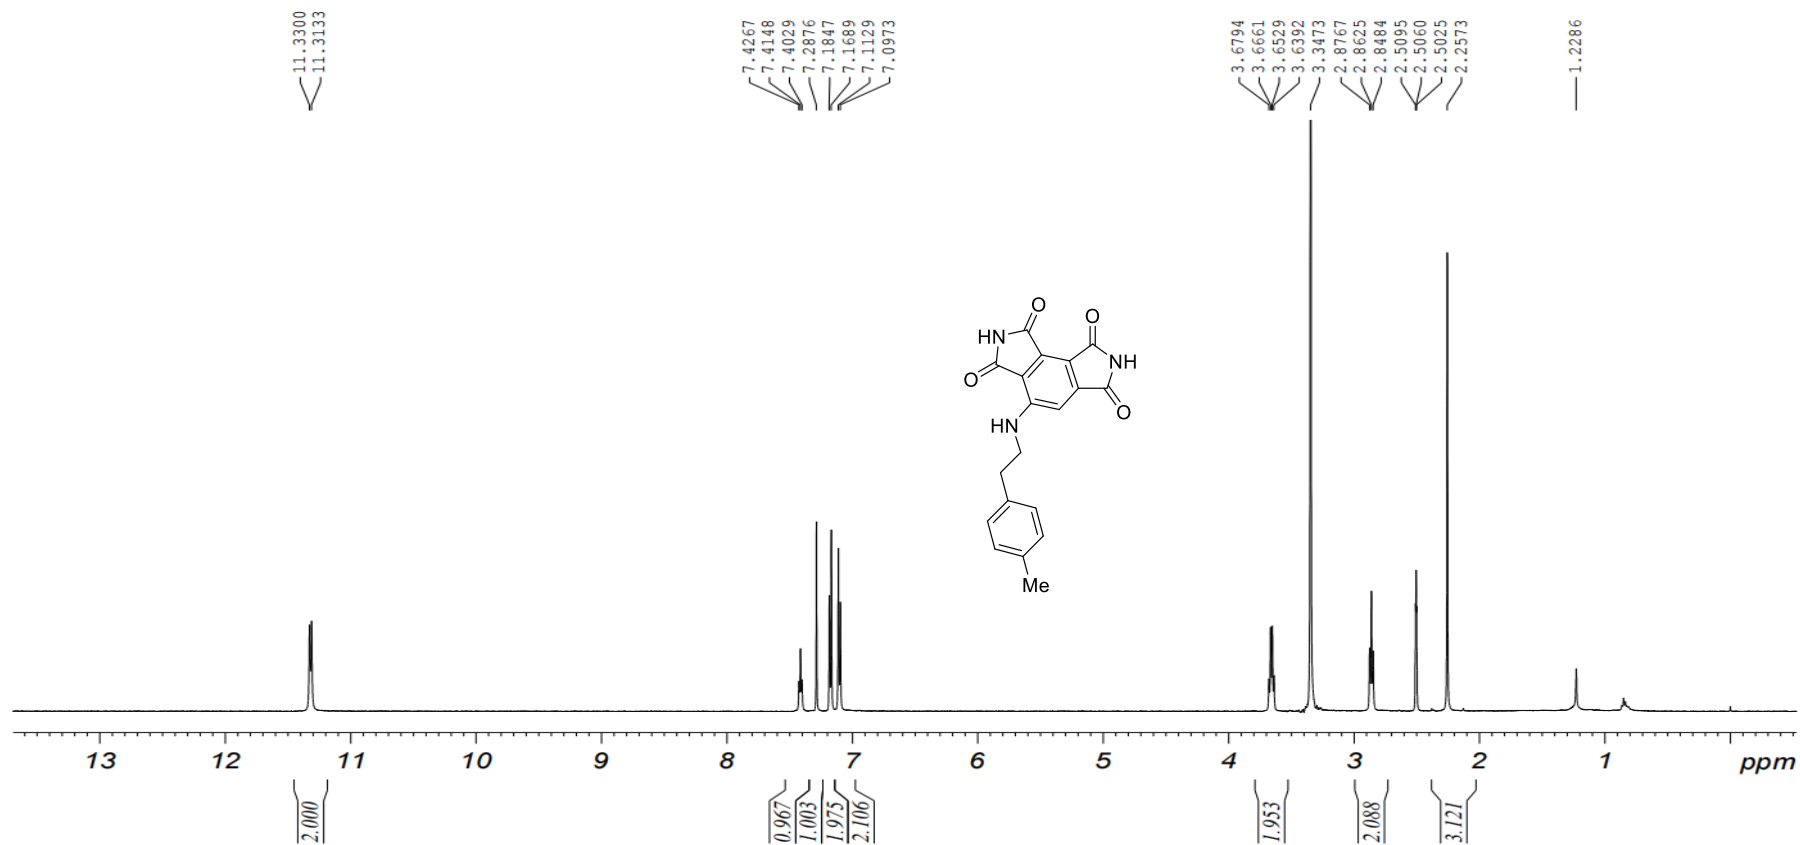

Figure S64.  $^1\text{H}$  NMR (500 MHz,  $\text{DMSO-}d_6$ ) spectra of compound 3d'



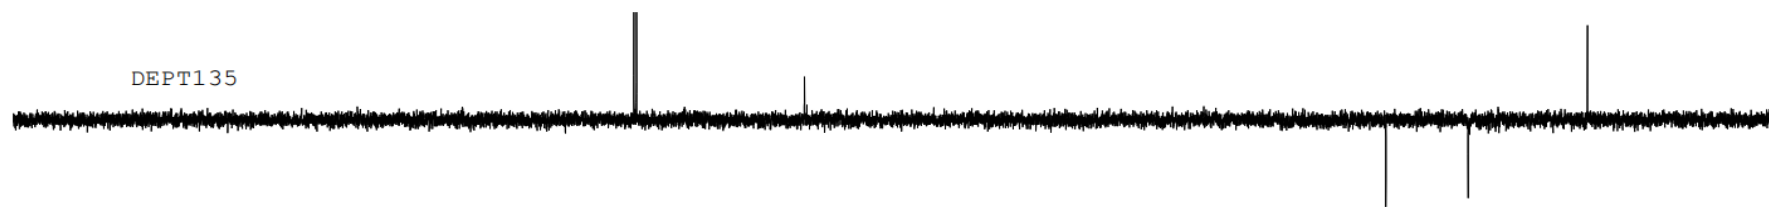

YunNan University AVANCEHDIII 500M y-1-24  
 Jul28-2023-yangjiaming  
 C13CPD DMSO

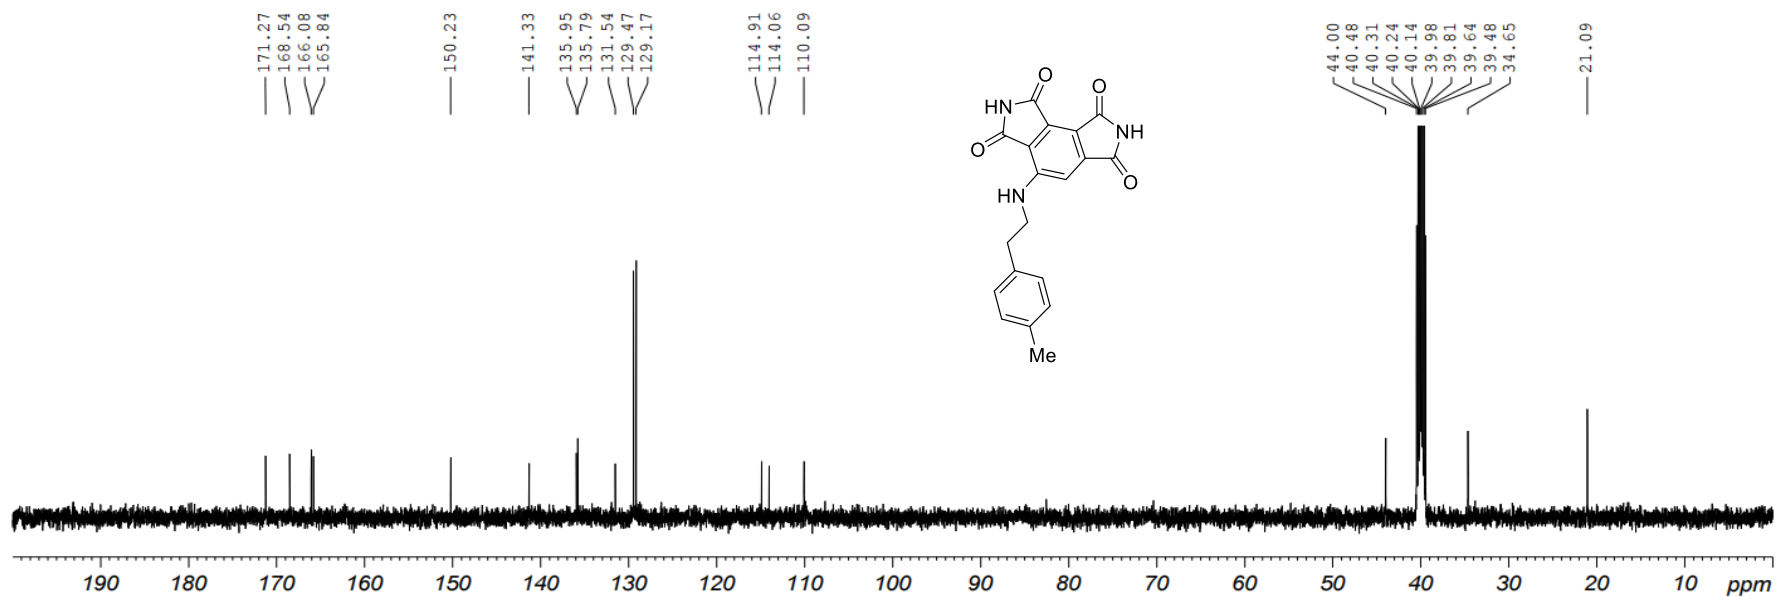

Figure S65. <sup>13</sup>C NMR (125 MHz, DMSO-*d*<sub>6</sub>) spectra of compound 3d'

YunNan University AVANCEHDIII 500M y-1-23  
Jul28-2023-yangjiaming  
PROTON DMSO

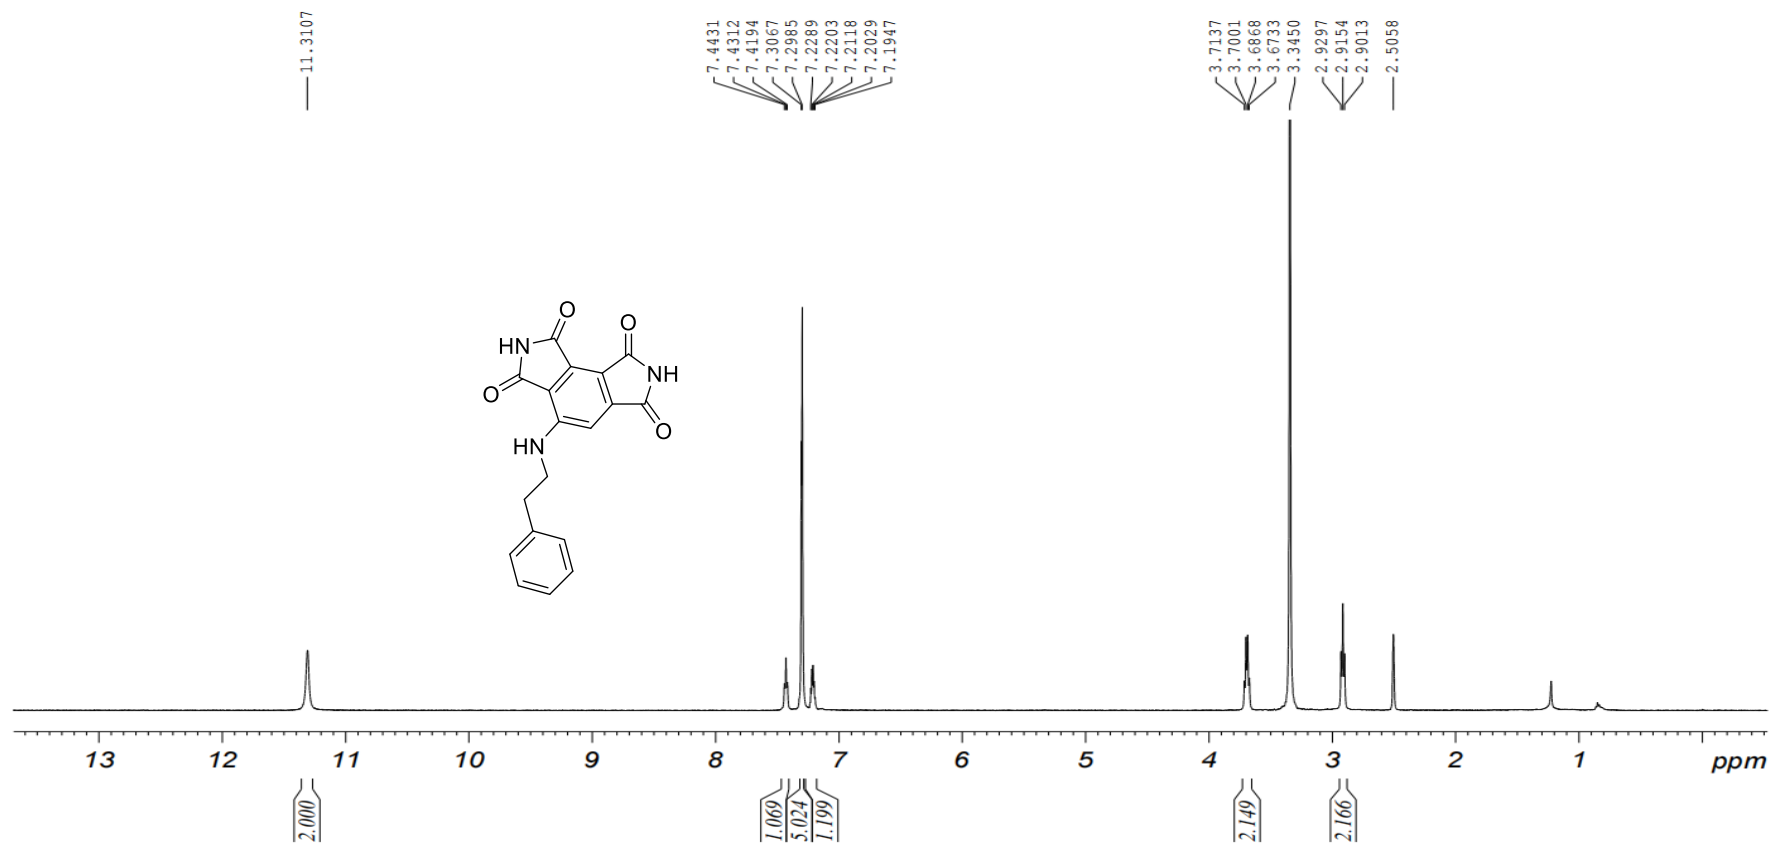

Figure S66.  $^1\text{H}$  NMR (500 MHz,  $\text{DMSO-}d_6$ ) spectra of compound 3e'

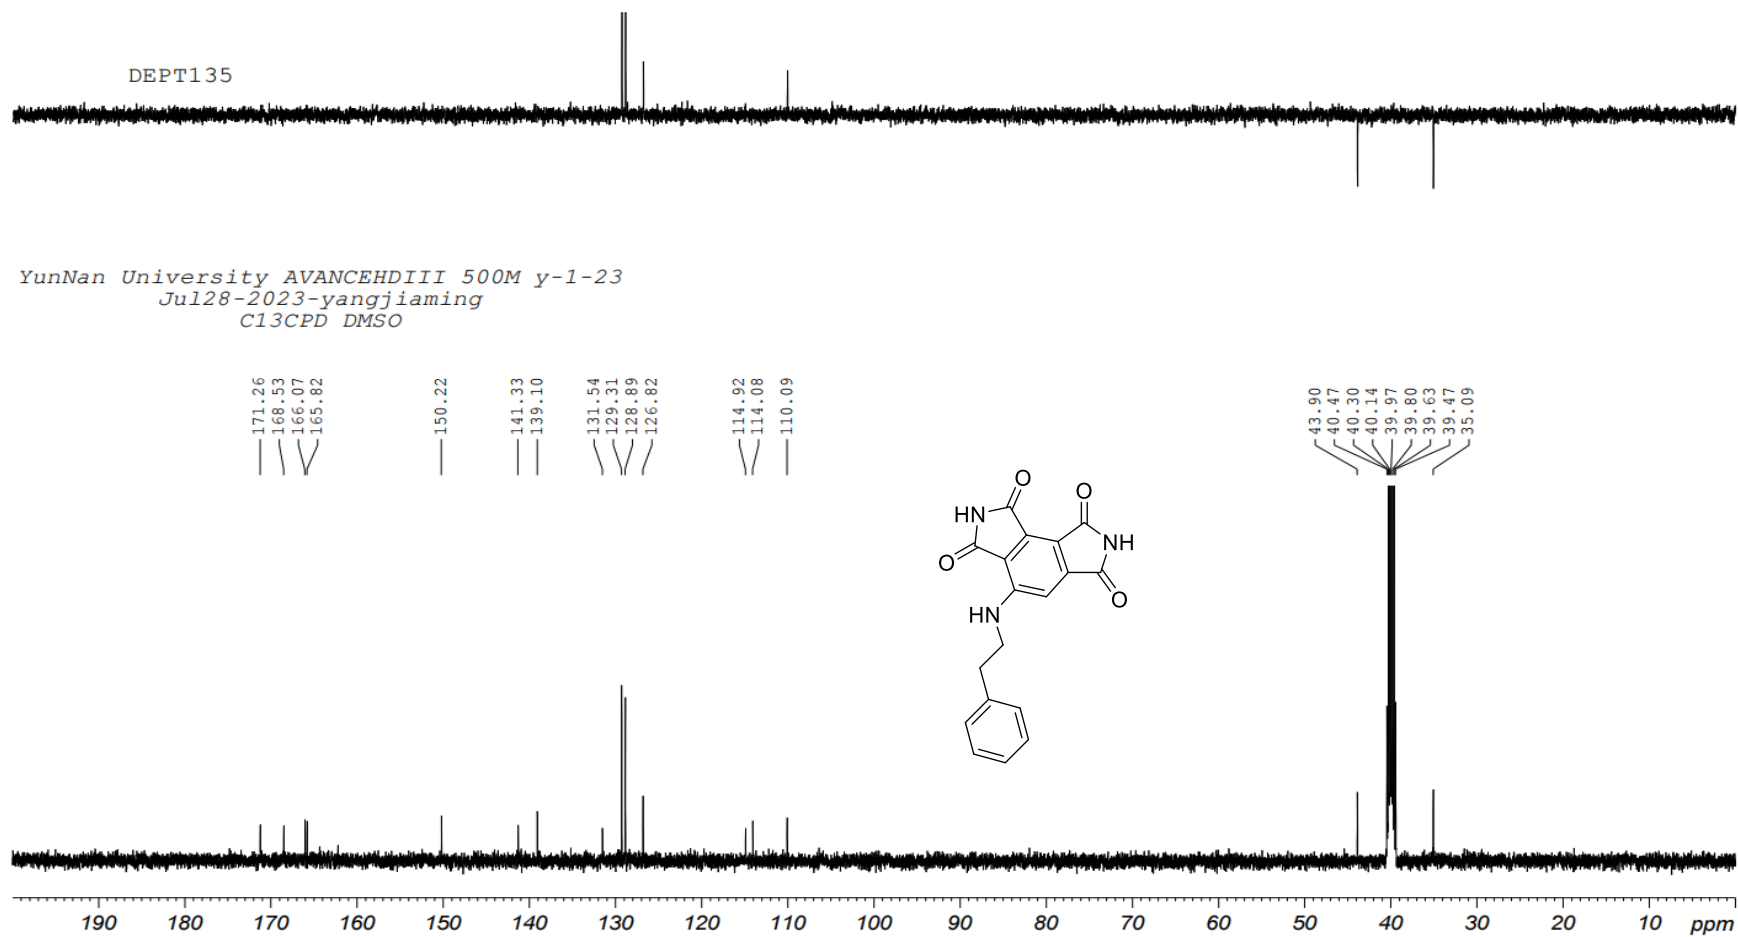

Figure S67. <sup>13</sup>C NMR (125 MHz, DMSO-*d*<sub>6</sub>) spectra of compound 3e'

YunNan University AVANCEHDIII 500M y-1-22  
Jul28-2023-yangjiaming  
PROTON DMSO

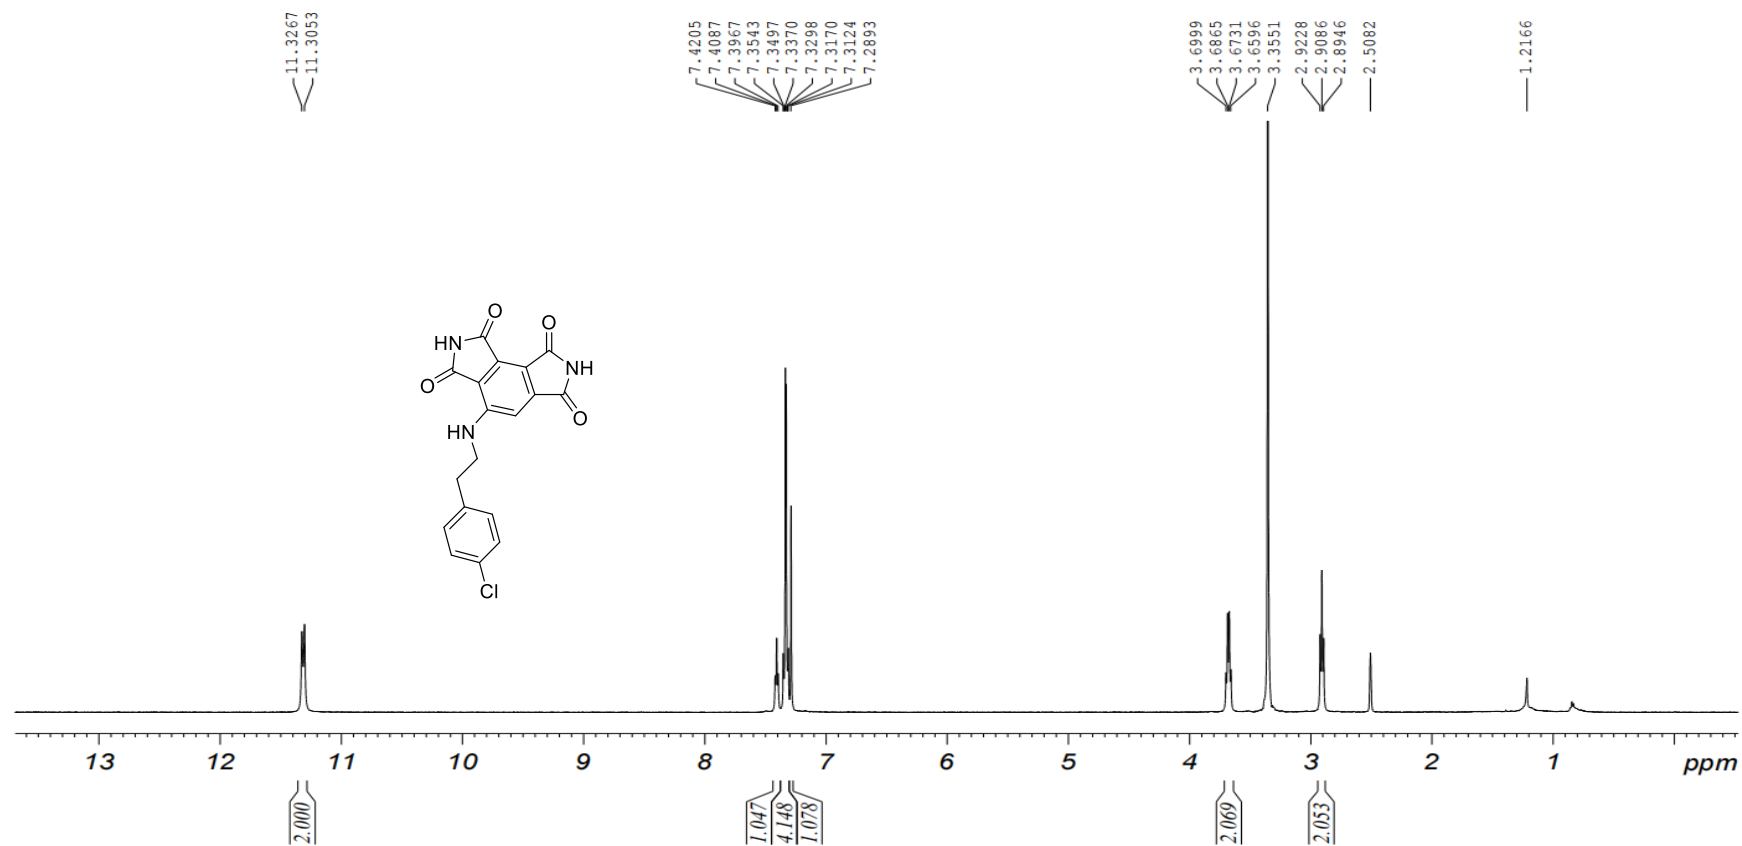

Figure S68.  $^1\text{H}$  NMR (500 MHz,  $\text{DMSO-}d_6$ ) spectra of compound 3f

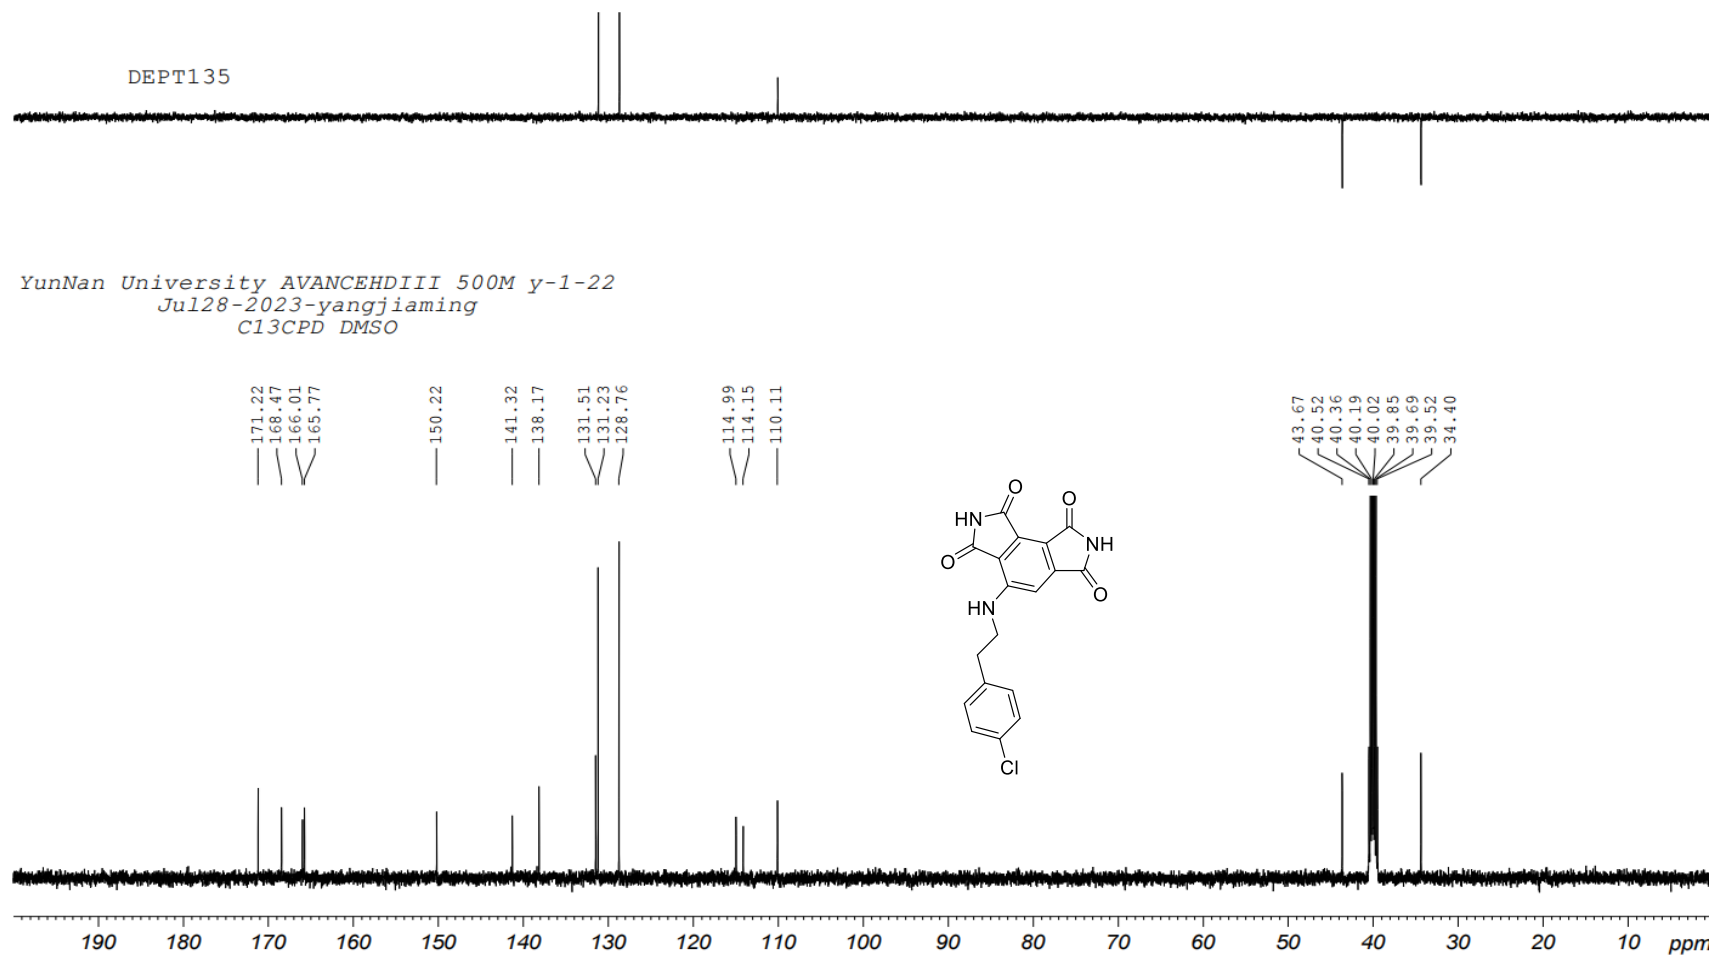

Figure S69.  $^{13}\text{C}$  NMR (125 MHz,  $\text{DMSO-}d_6$ ) spectra of compound **3f**

YUNNAN UNIVERSITY ASCEND AVIIIHD600 y-1-25  
Sep01-2023-yangjiaming  
PROTON DMSO

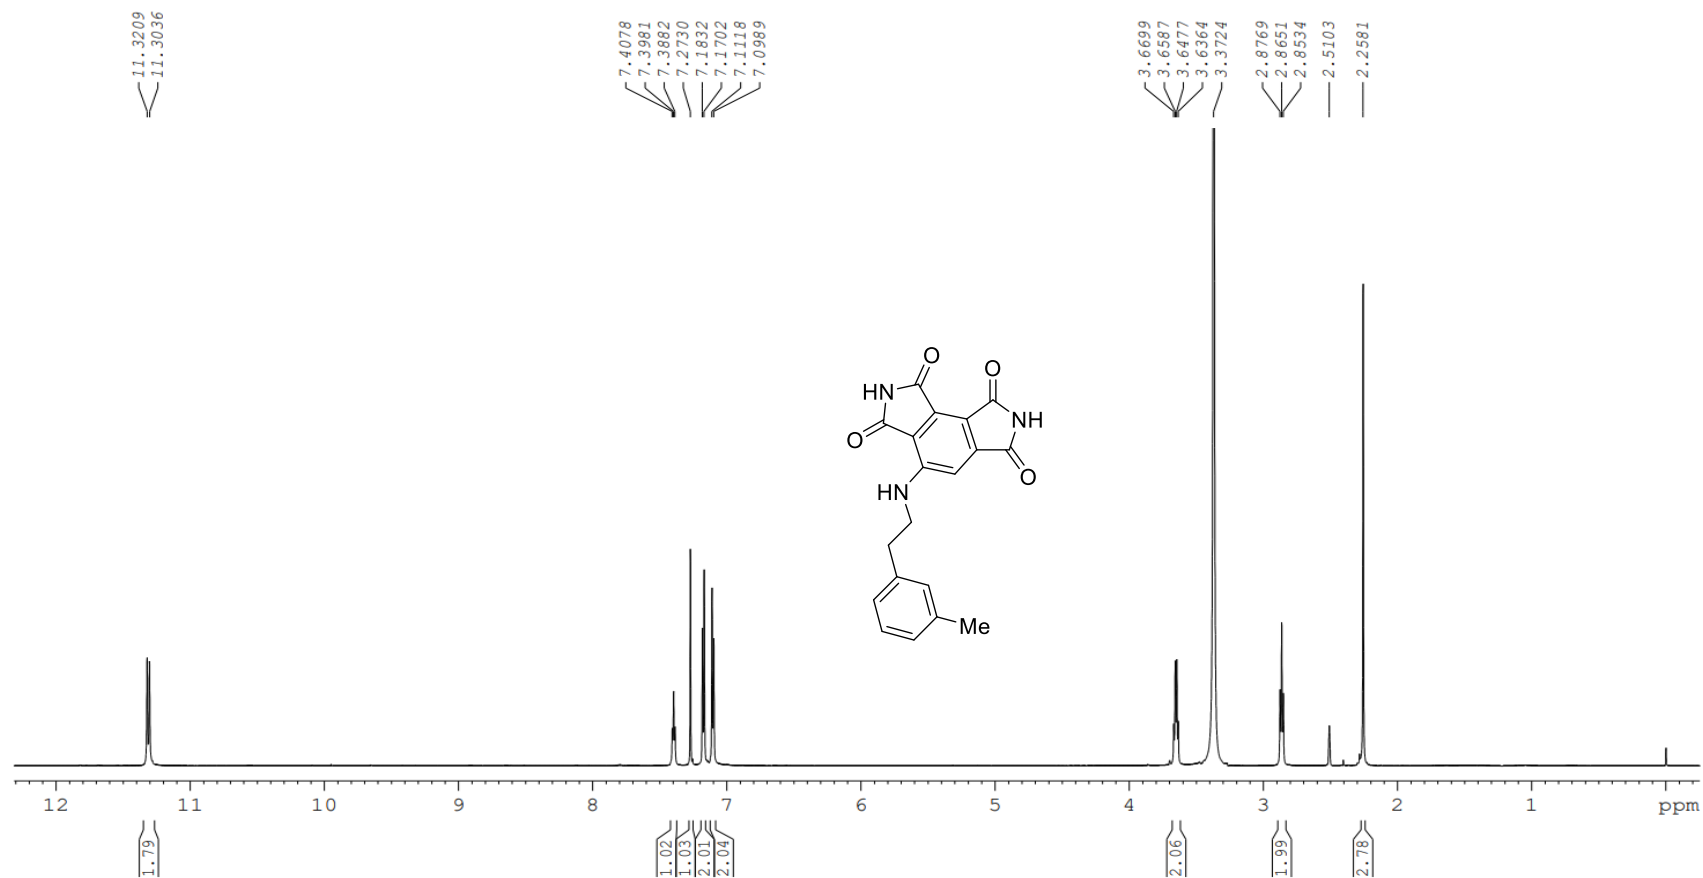

Figure S70.  $^1\text{H NMR}$  (600 MHz,  $\text{DMSO-}d_6$ ) spectra of compound **3g'**

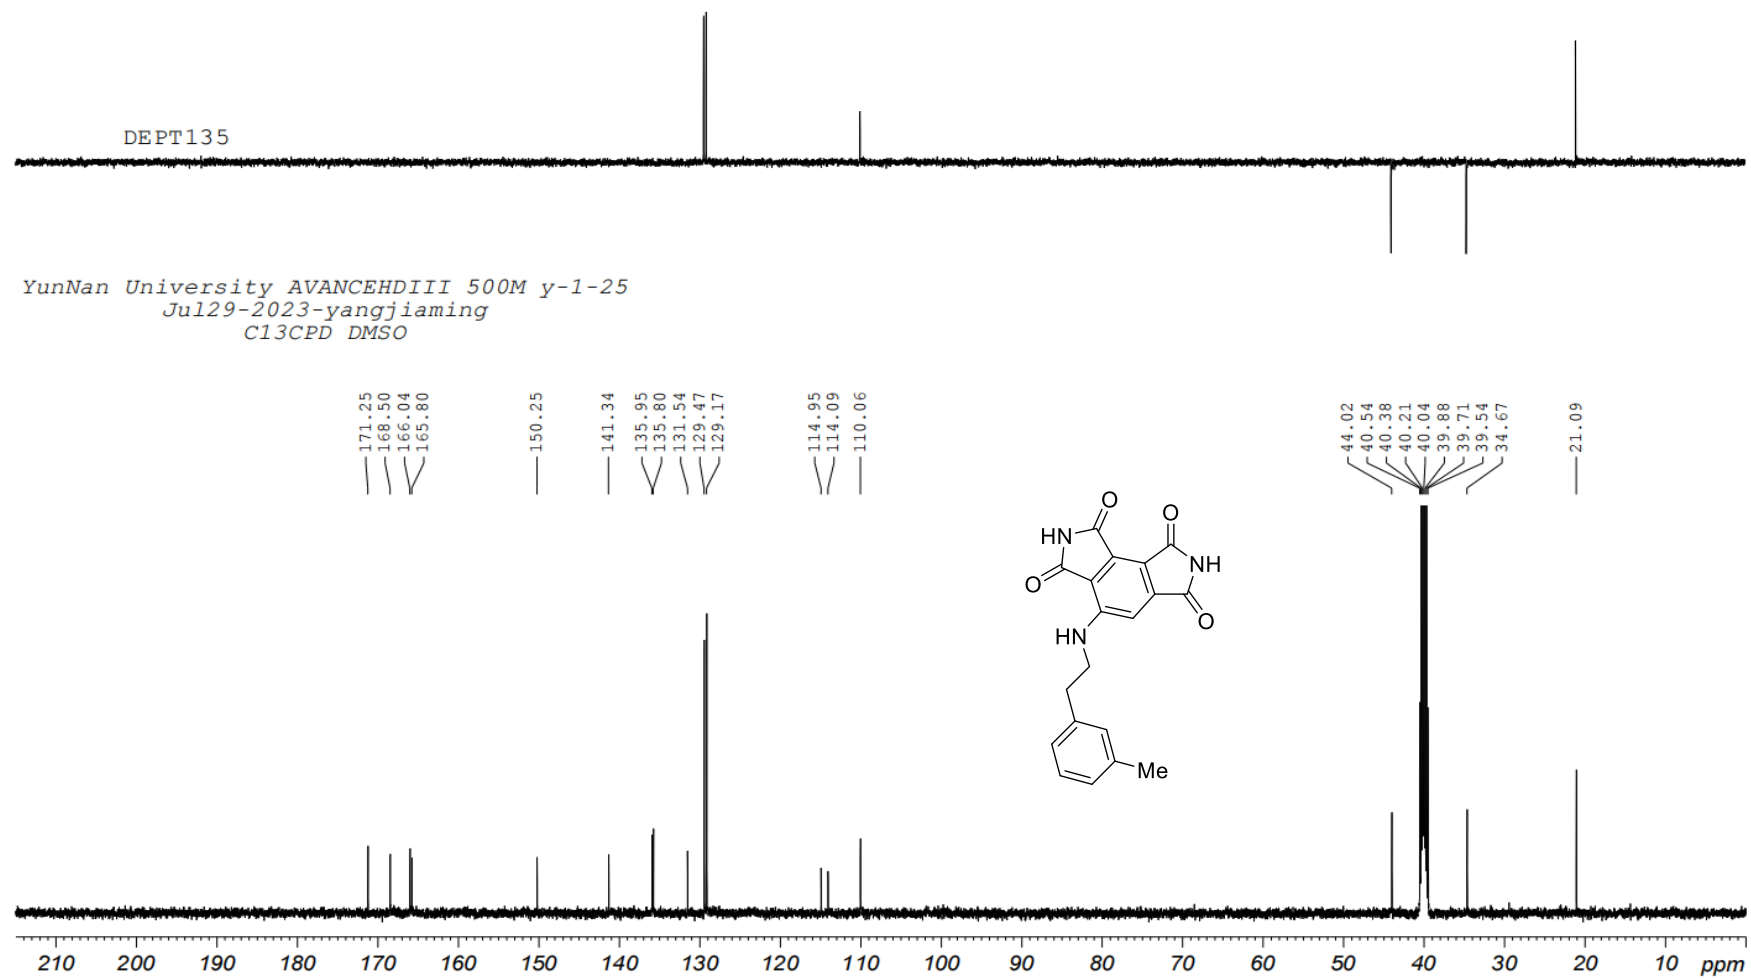

Figure S71.  $^{13}\text{C}$  NMR (125 MHz,  $\text{DMSO-}d_6$ ) spectra of compound 3g'

YUNNAN UNIVERSITY ASCEND AVIIIHD600 y-1-21  
Sep01-2023-yangjiaming  
PROTON DMSO

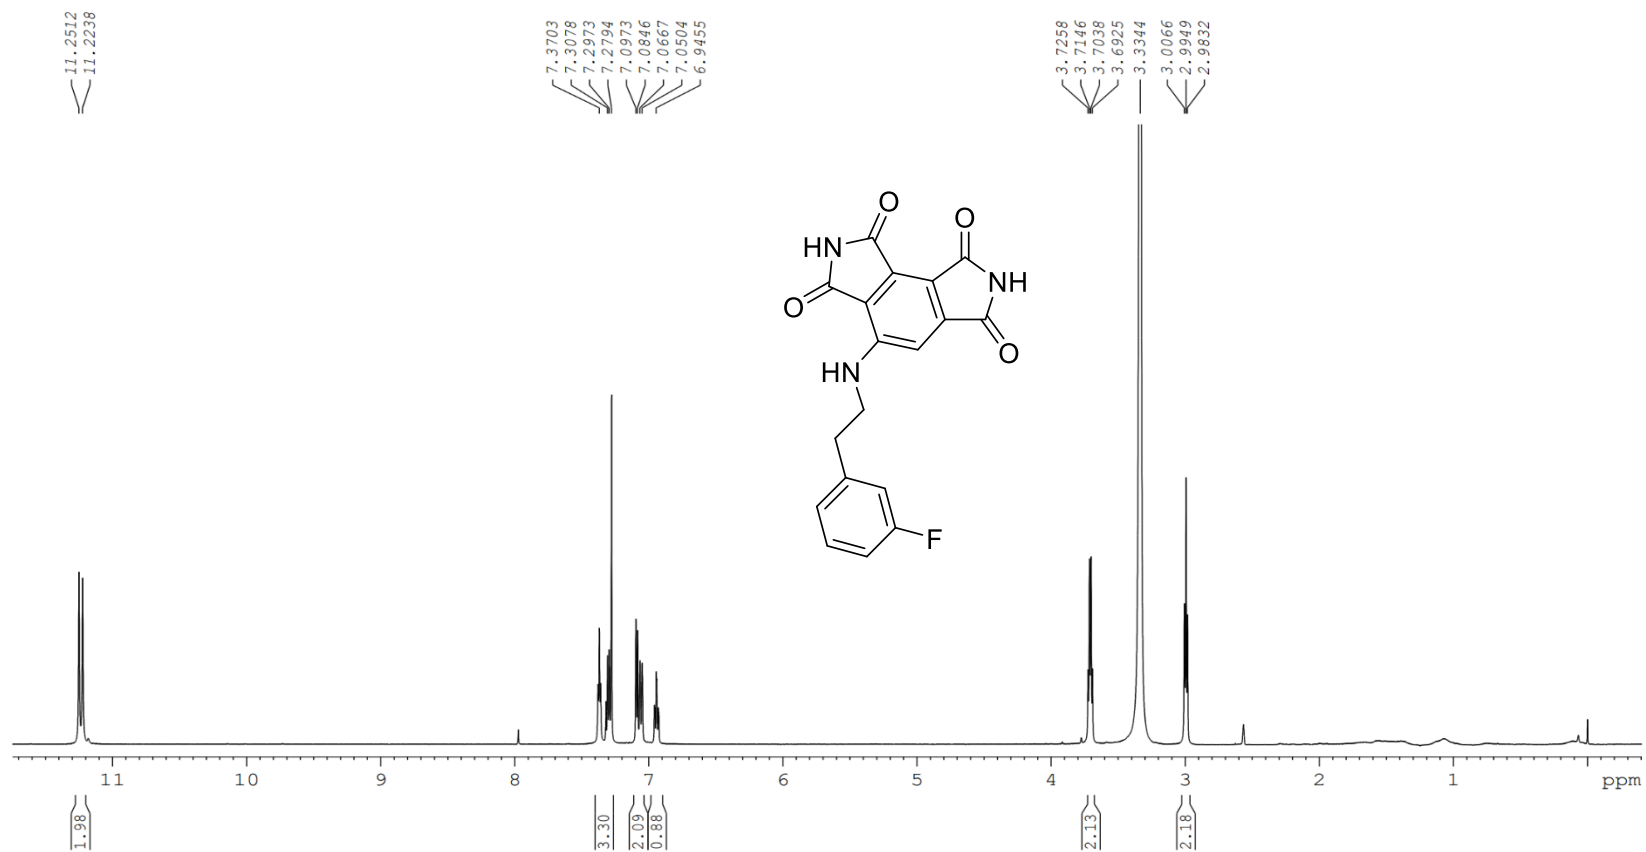

Figure S72.  $^1\text{H NMR}$  (600 MHz,  $\text{DMSO-}d_6$ ) spectra of compound **3h'**



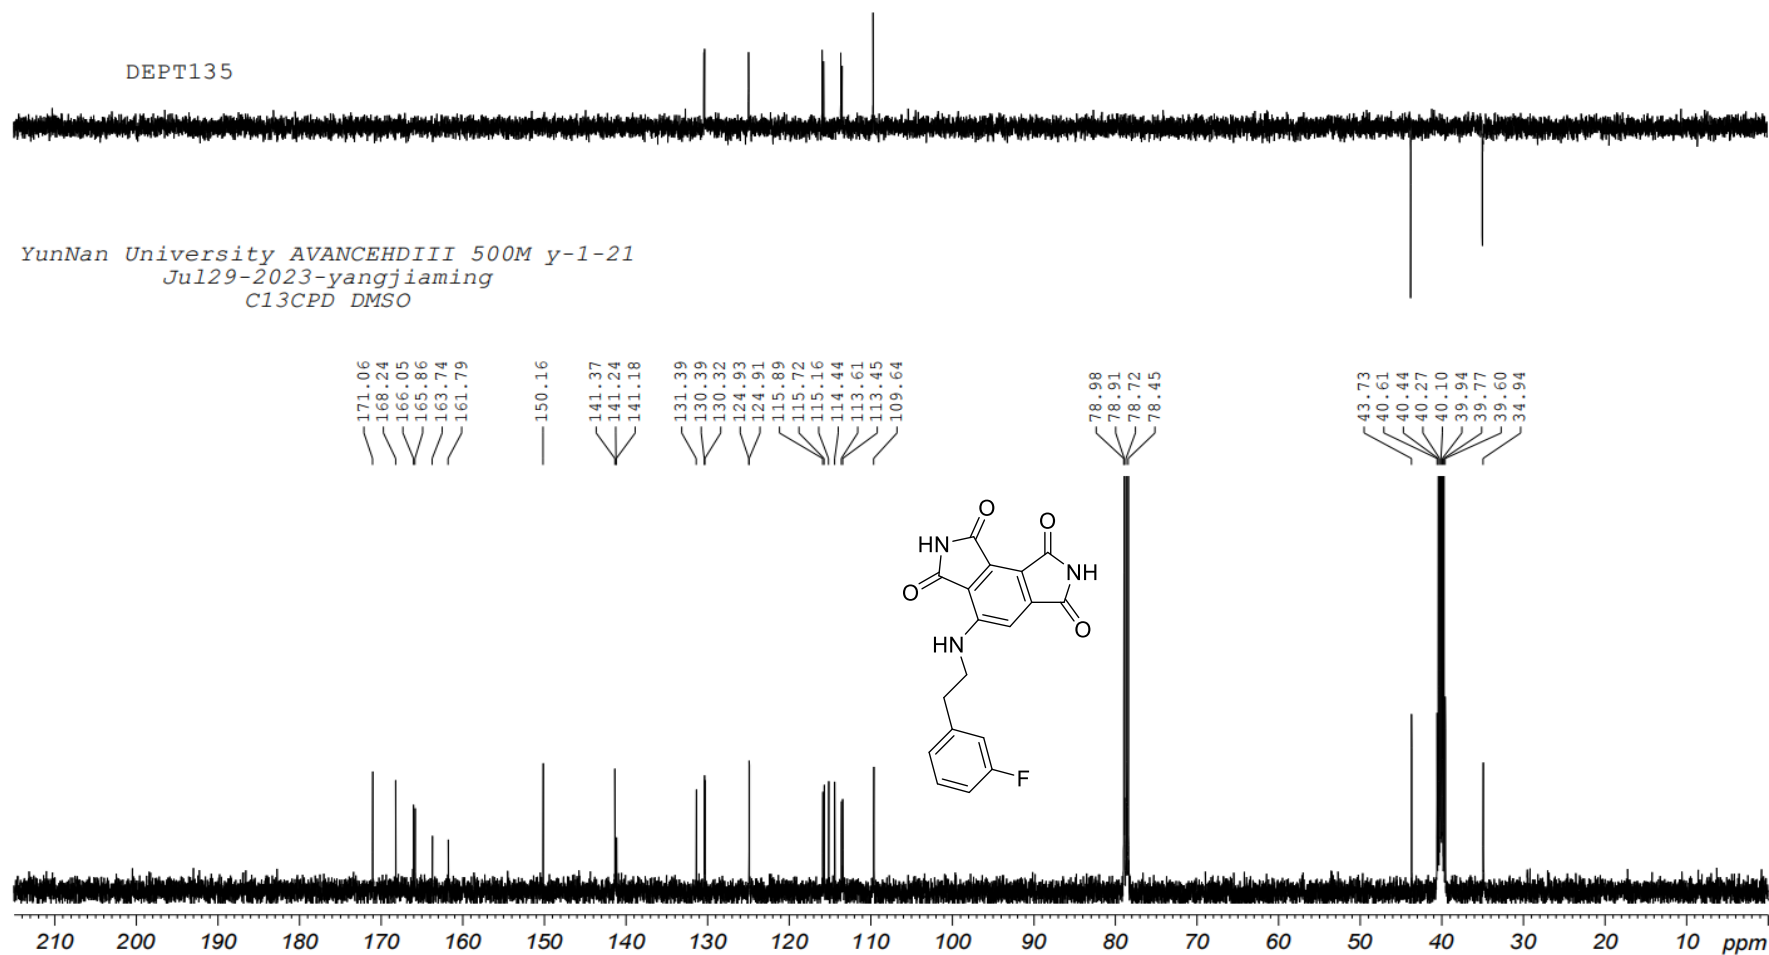

Figure S73.  $^{13}\text{C}$  NMR (150 MHz,  $\text{DMSO-}d_6$ ) spectra of compound **3h'**

YunNan University AVANCEHDIII 500M y-1-21  
Jul29-2023-yangjiaming  
F19CPD DMSO

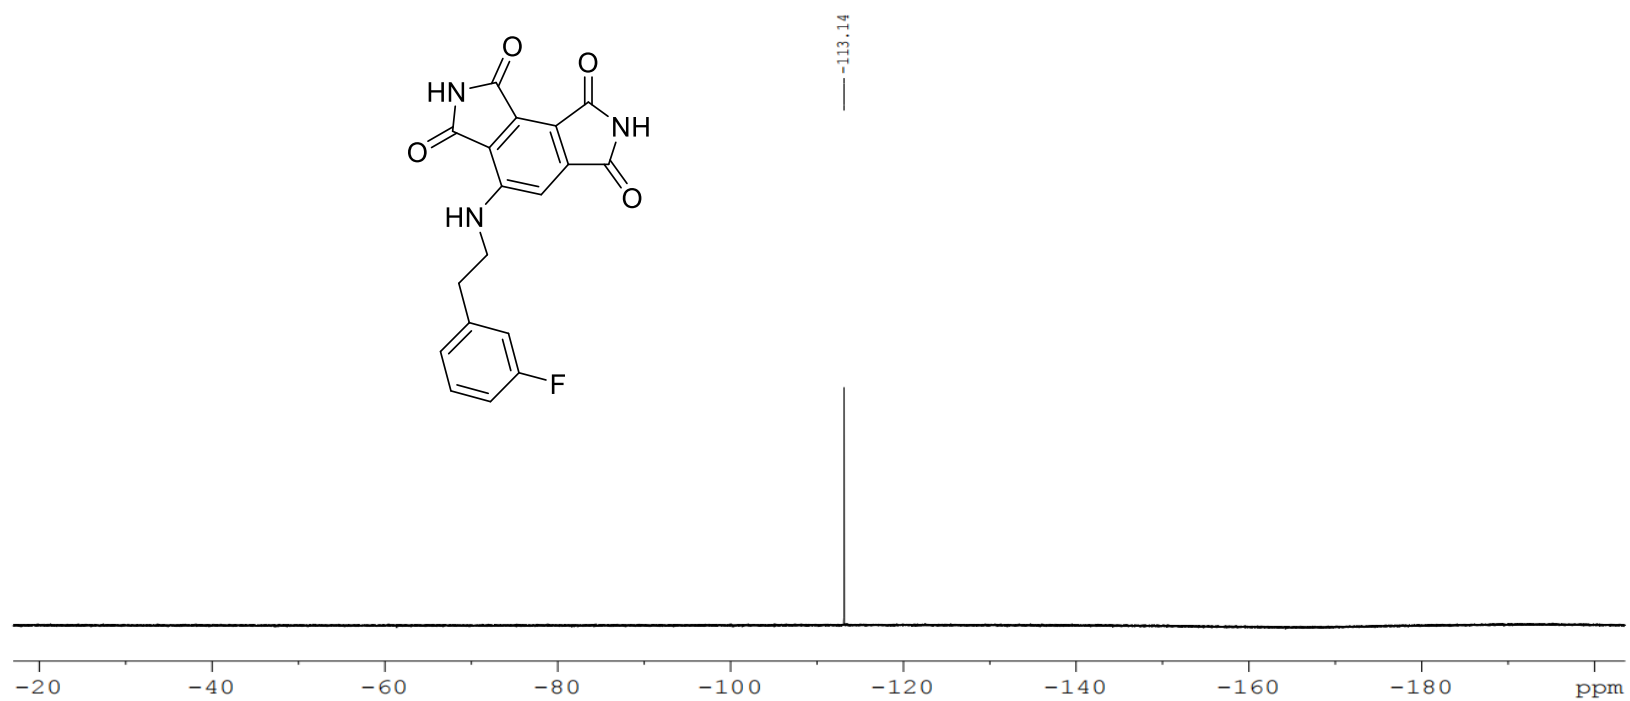

**Figure S74.**  $^{19}\text{F}$  NMR (564 MHz,  $\text{DMSO-}d_6$ ) spectra of compound **3h'**

YUNNAN UNIVERSITY ASCEND AVIIIHD600 y-1-1  
Jun25-2023-yangjiaming  
PROTON DMSO

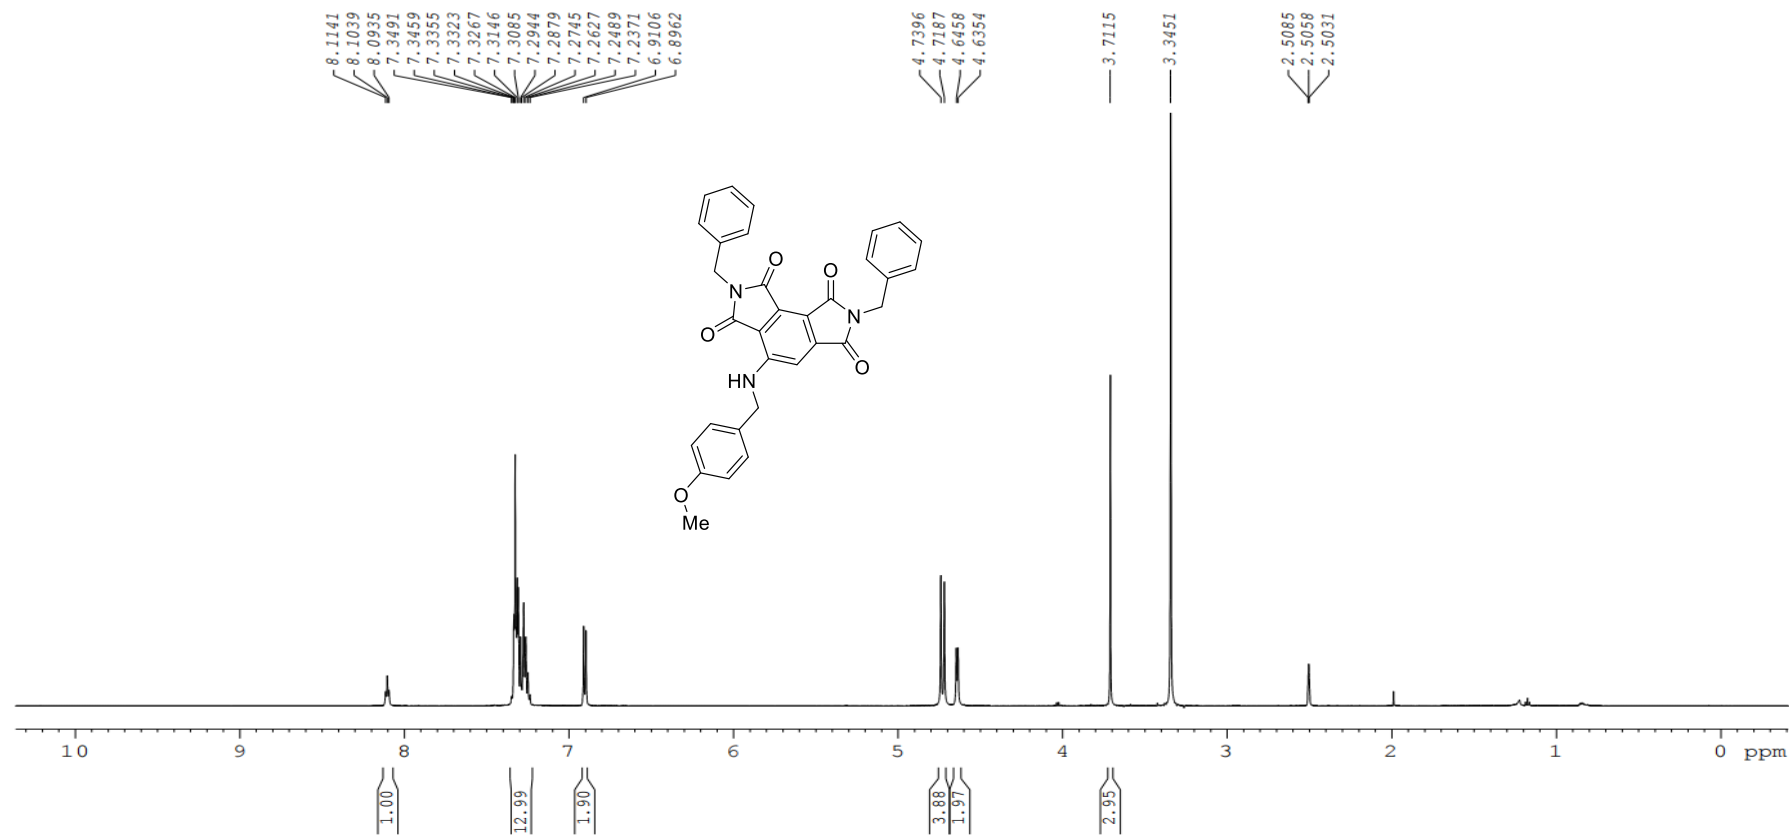

Figure S75.  $^1\text{H}$  NMR (600 MHz,  $\text{DMSO-}d_6$ ) spectra of compound 3i'

DEPT135

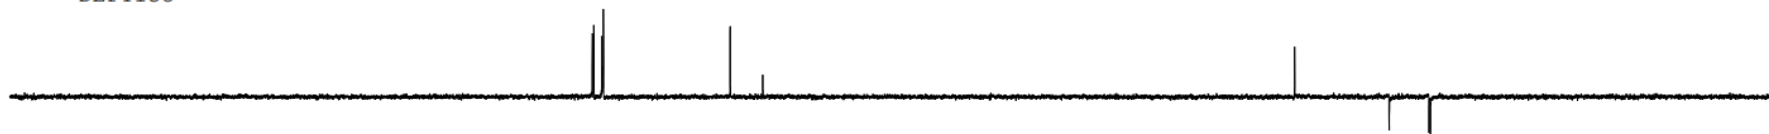

YUNNAN UNIVERSITY ASCEND AVIIIHD600 y-1-1  
Jun25-2023-yangjiaming  
C13CPD DMSO

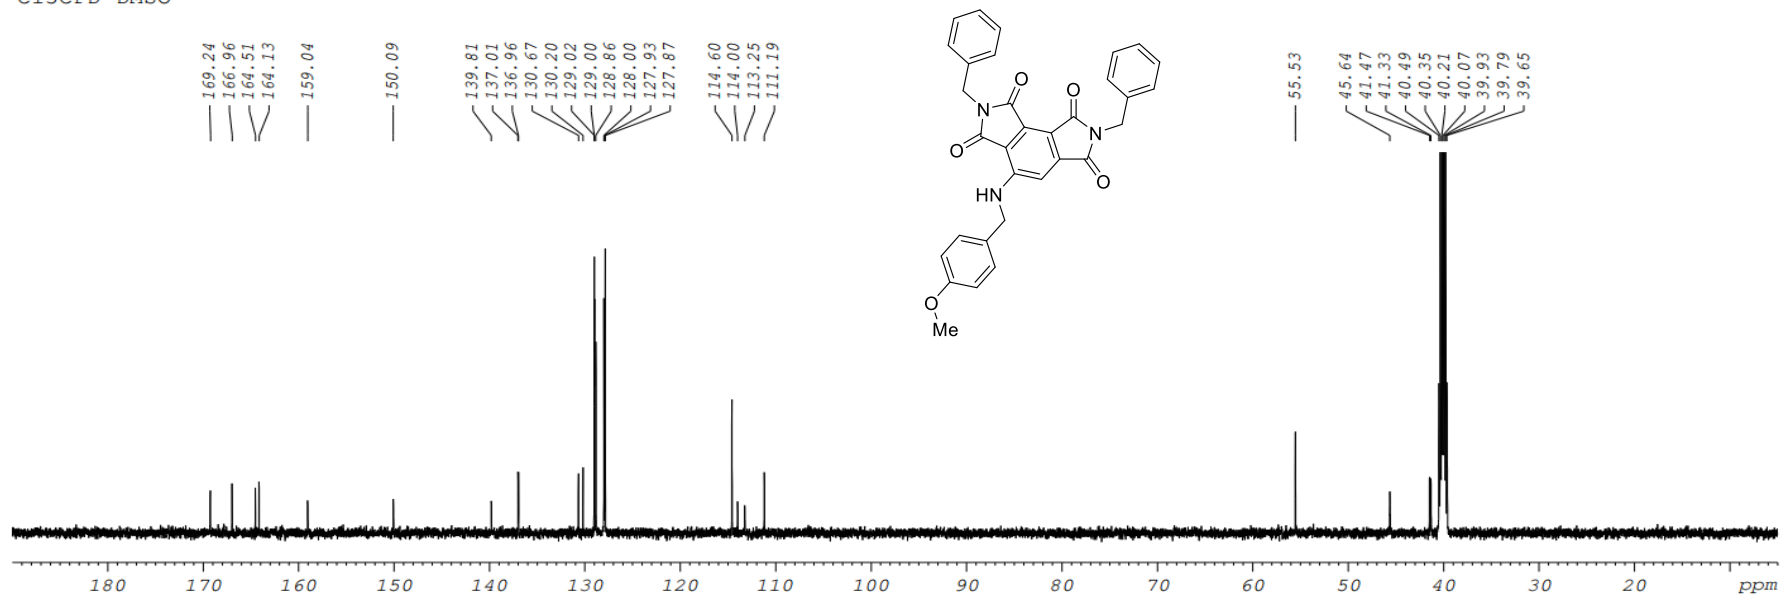

Figure S76. <sup>13</sup>C NMR (150 MHz, DMSO-d<sub>6</sub>) spectra of compound 3i'

YunNan University AVANCEHDIII 500M 6g'  
Aug15-2024-shaobina  
PROTON DMSO

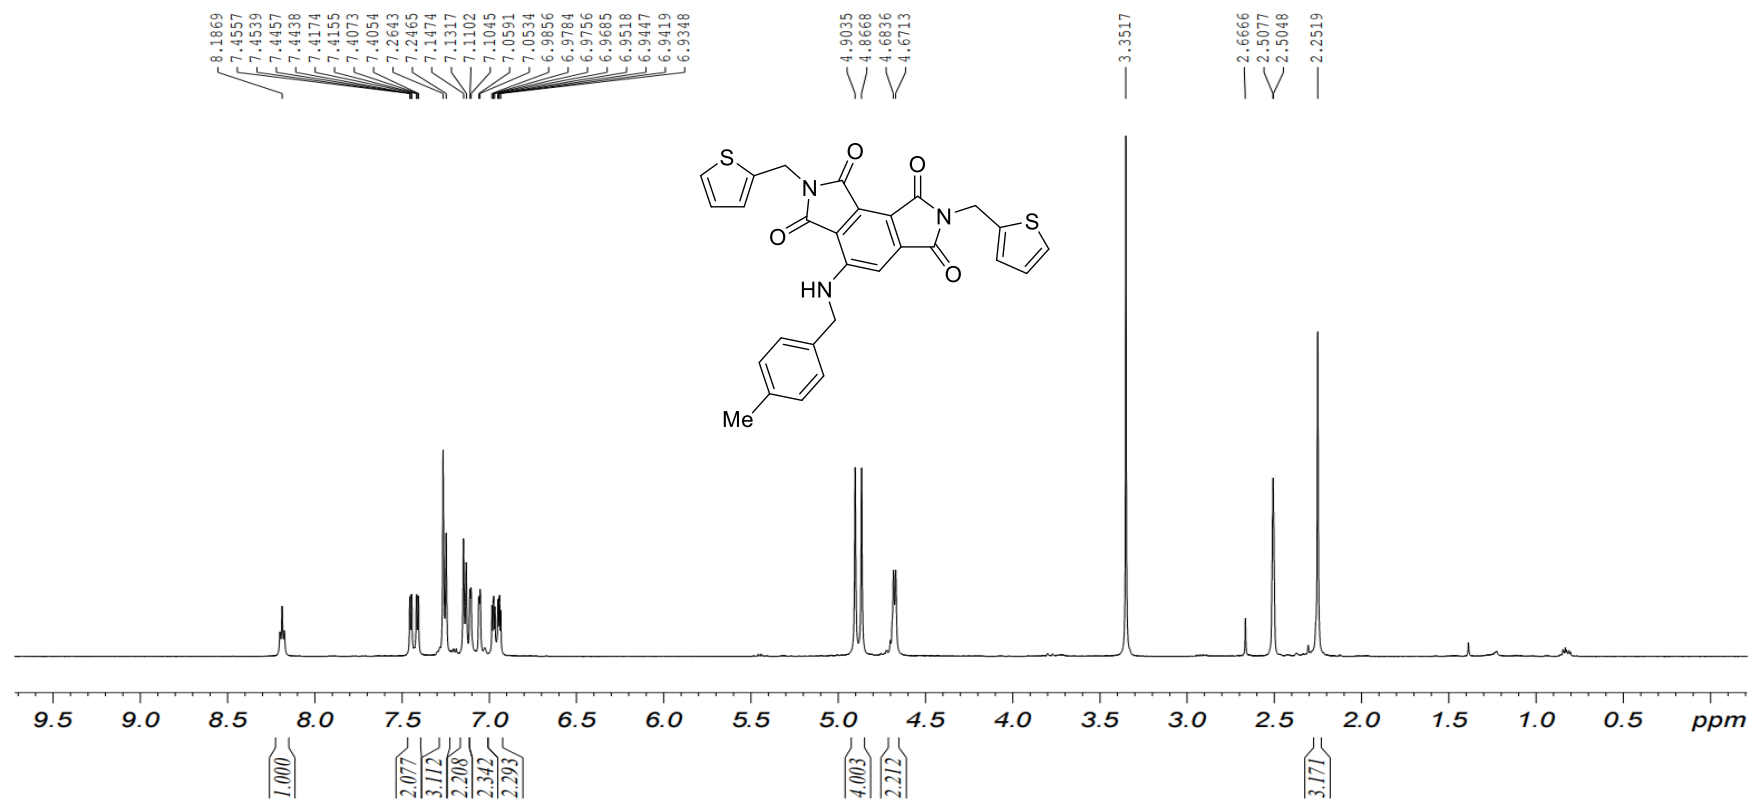

Figure S77. <sup>1</sup>H NMR (500 MHz, DMSO-d<sub>6</sub>) spectra of compound 3j'

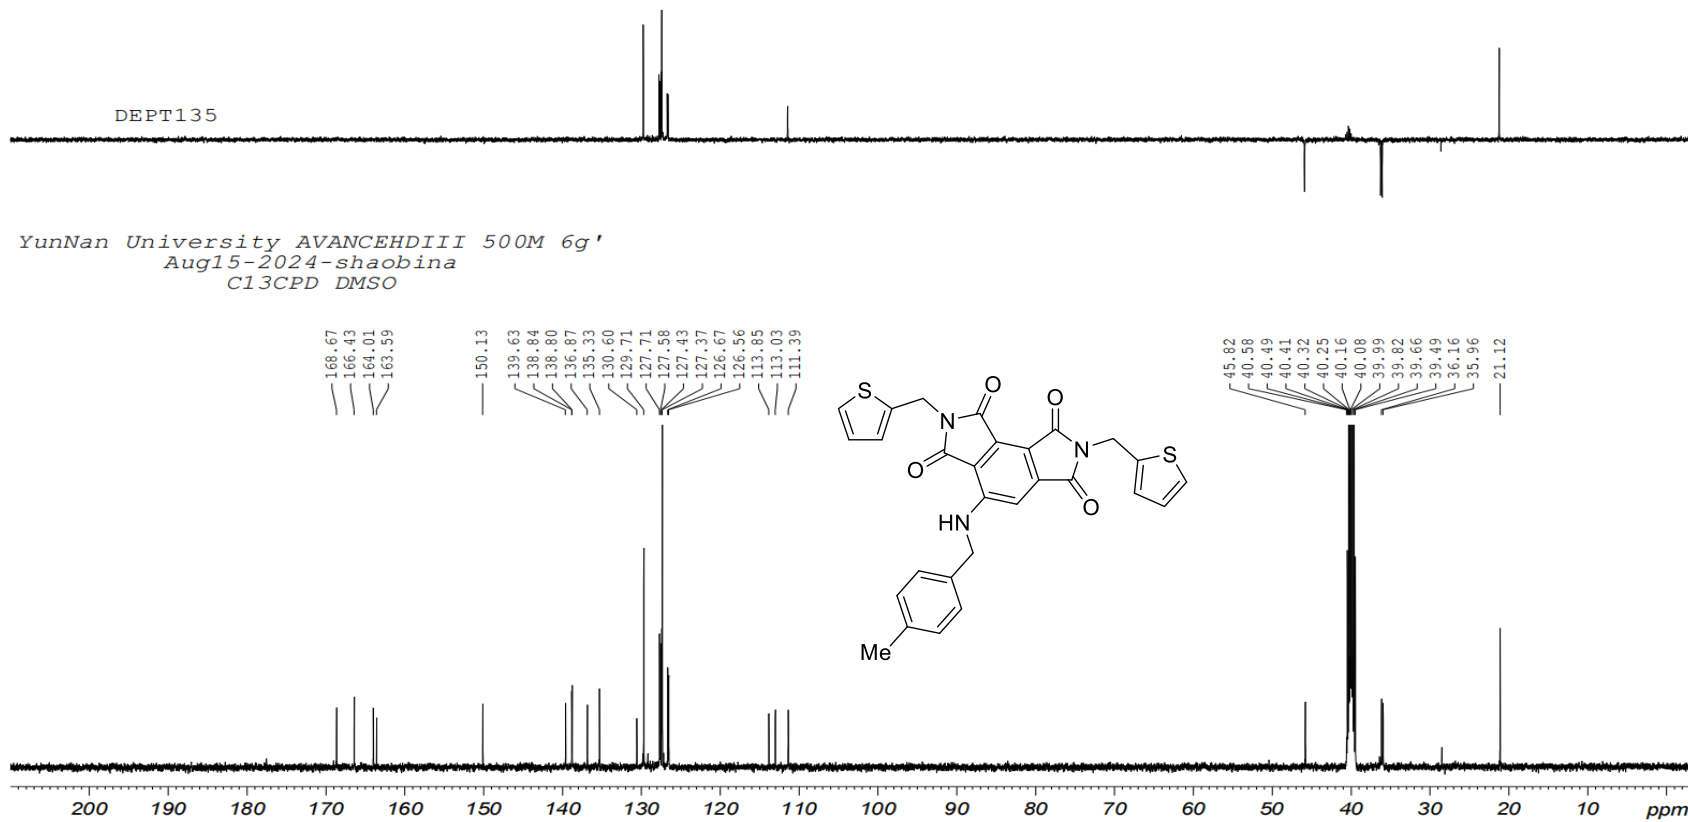

Figure S78. <sup>13</sup>C NMR (125 MHz, DMSO-*d*<sub>6</sub>) spectra of compound **3j'**

YUNNAN UNIVERSITY ASCEND AVIIIHD600 y-1-3  
Jun30-2023-yangjiaming  
PROTON DMSO

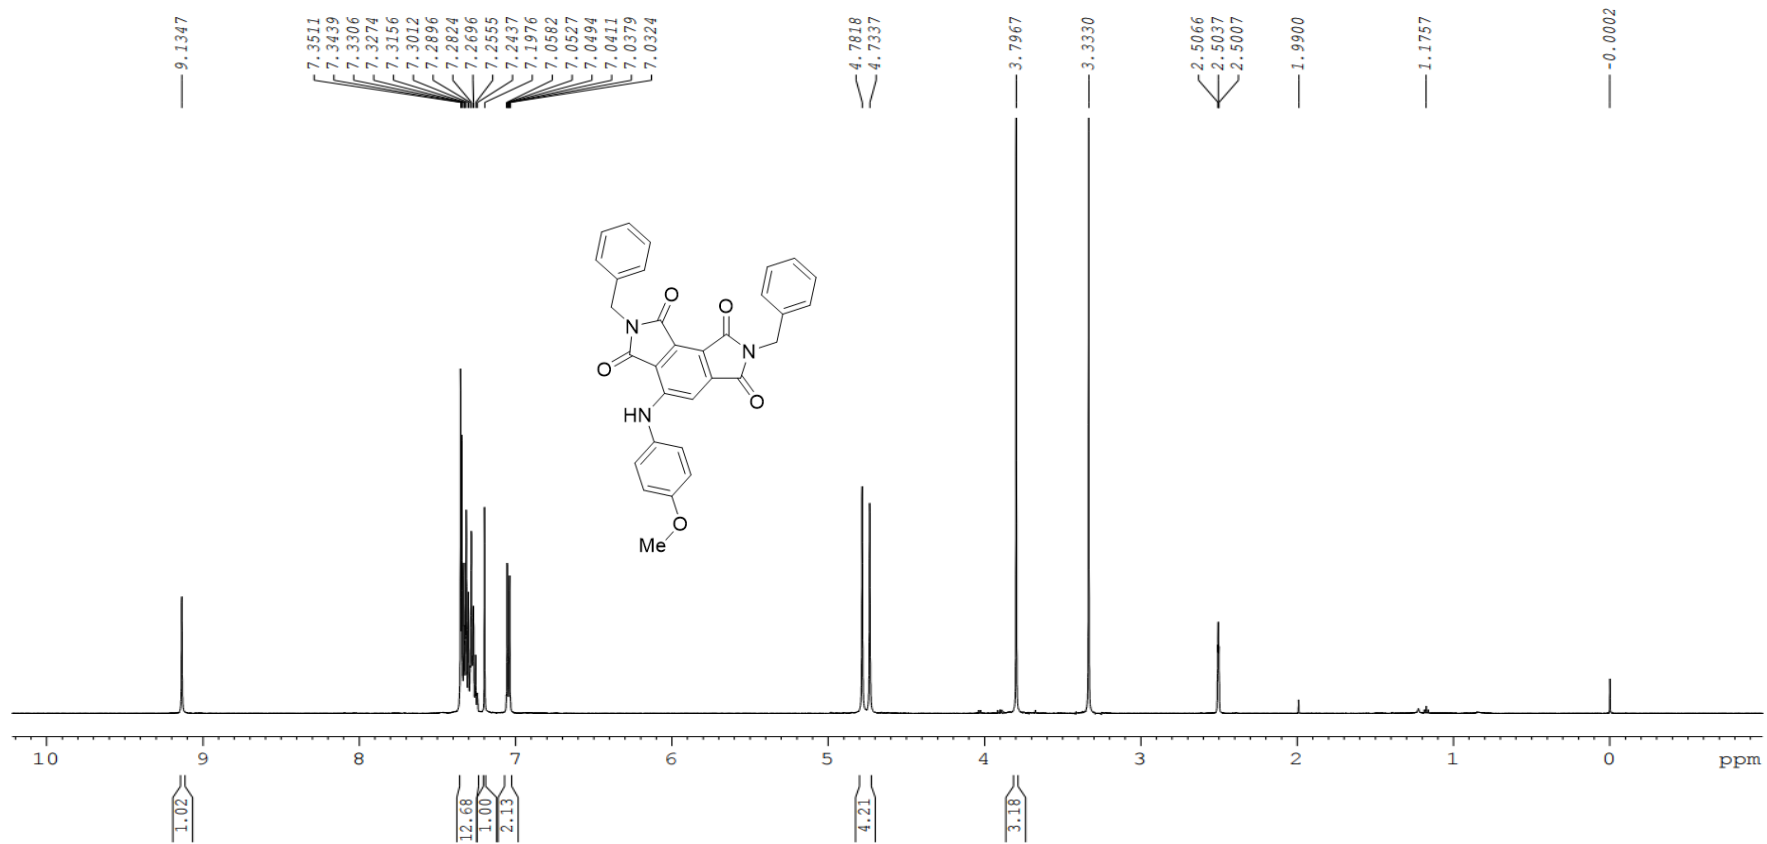

**Figure S79.**  $^1\text{H}$  NMR (600 MHz,  $\text{DMSO-}d_6$ ) spectra of compound **3k'**

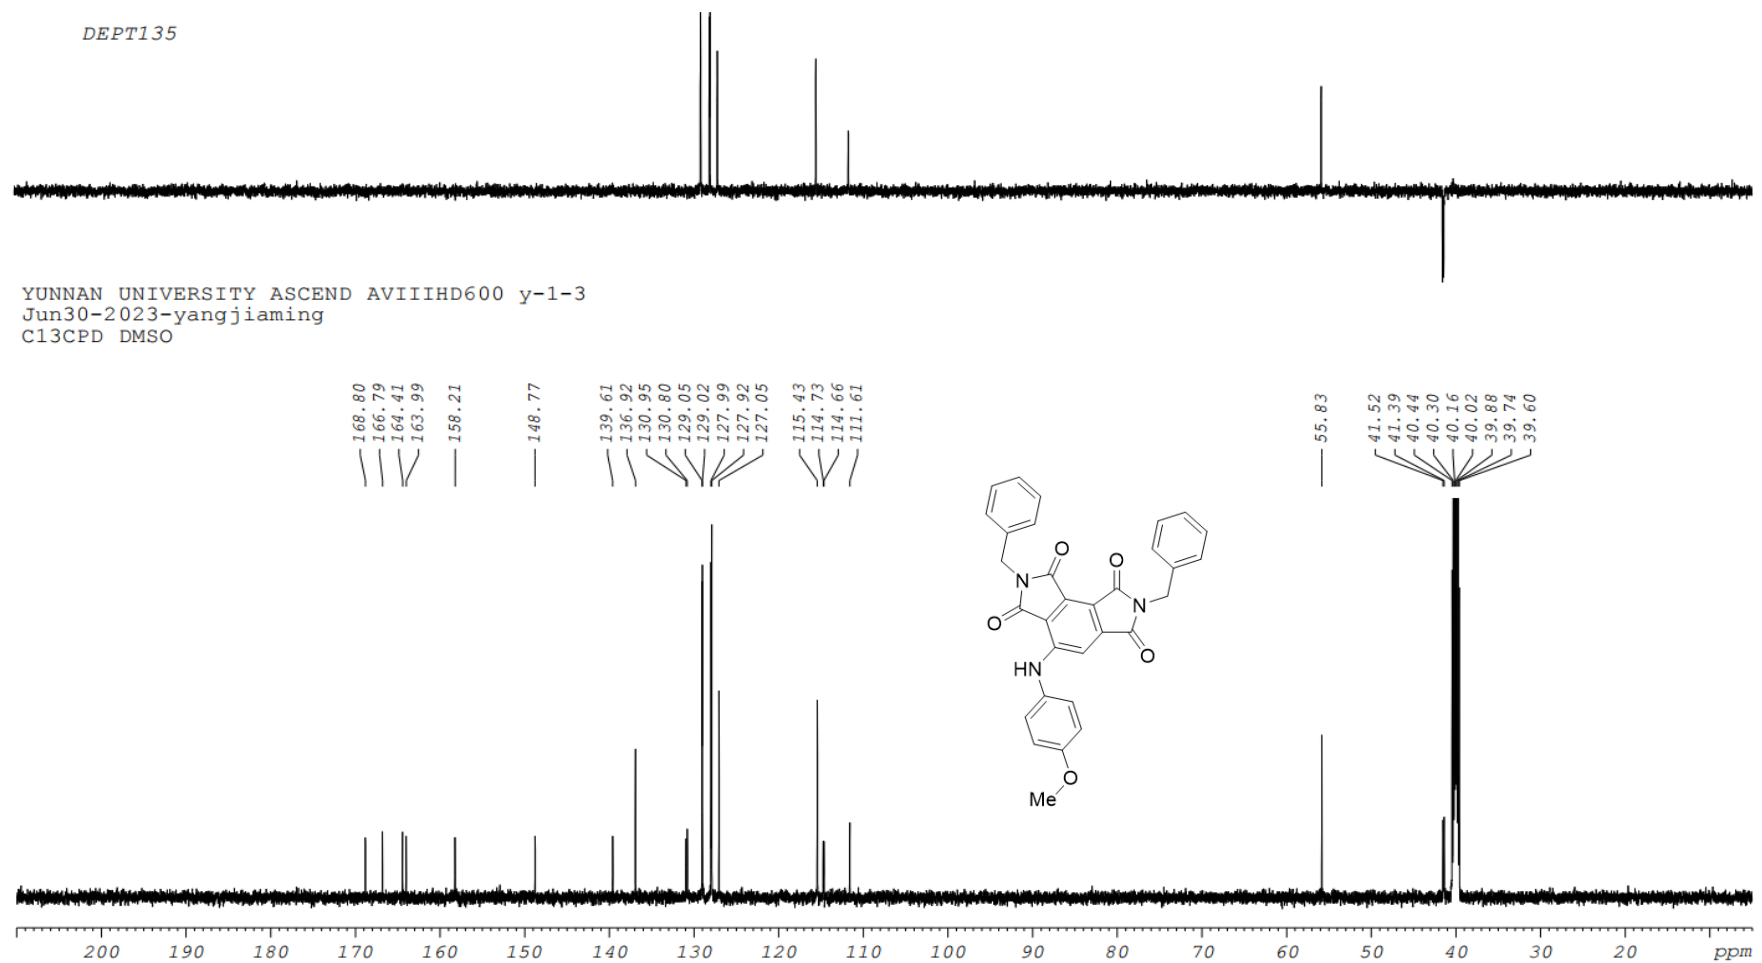

Figure S80.  $^{13}\text{C}$  NMR (150 MHz,  $\text{DMSO-}d_6$ ) spectra of compound **3k'**



RT: 0.00 - 3.49

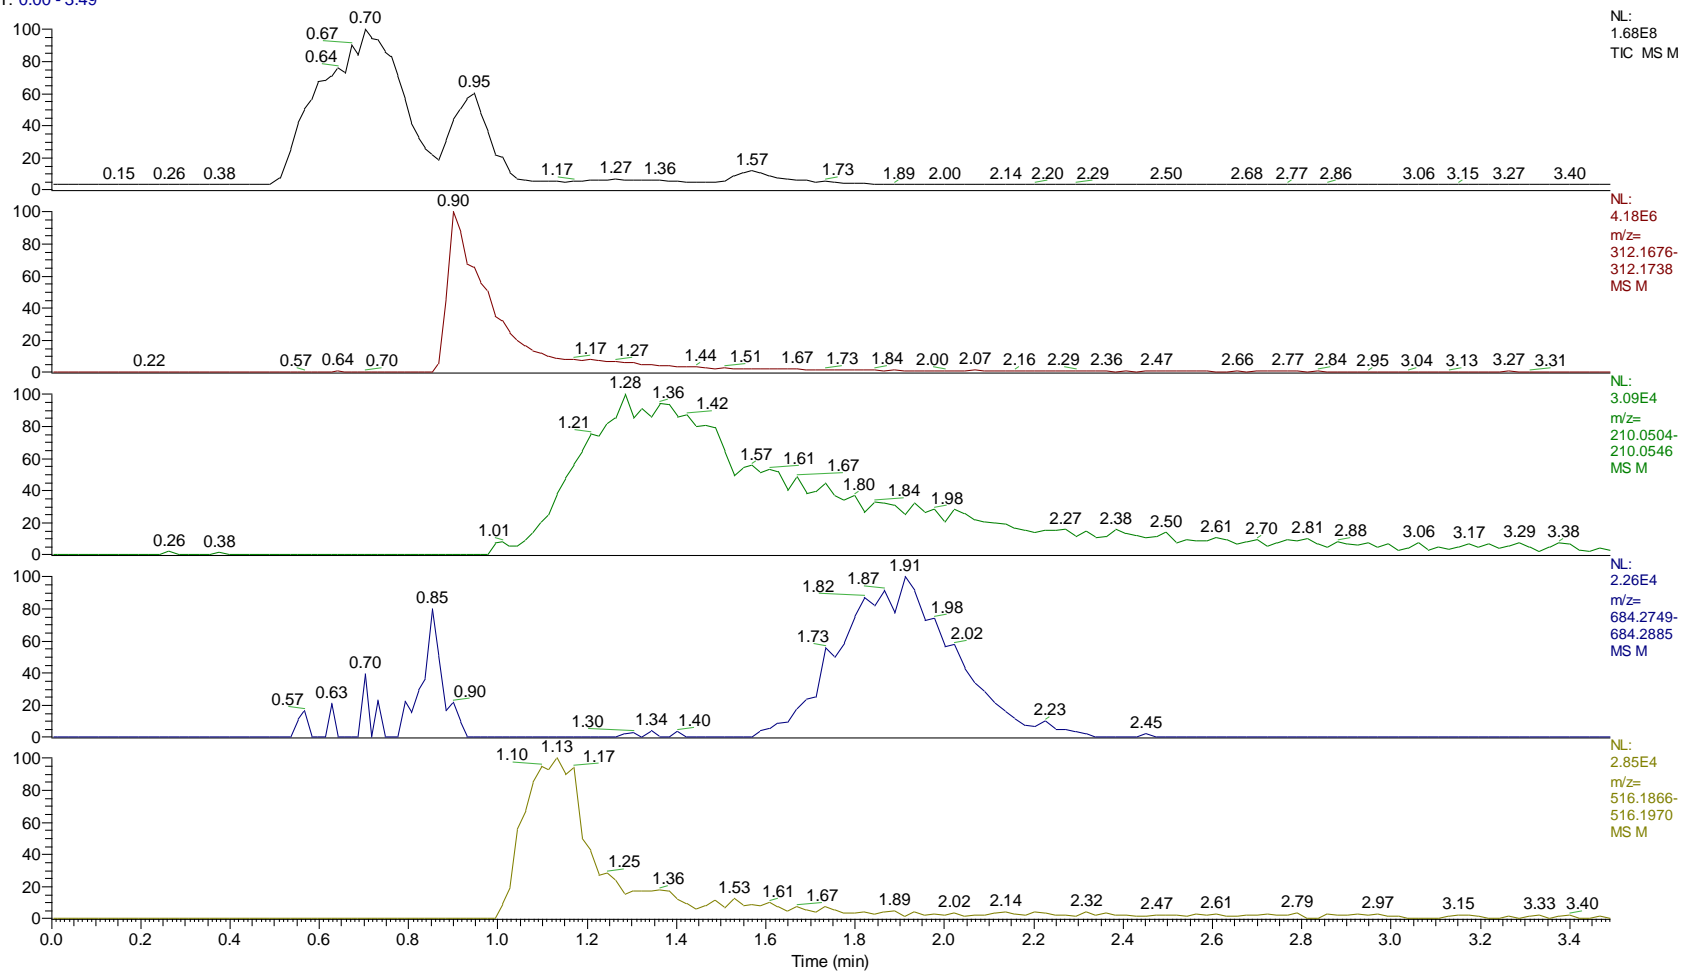

Figure S81. HPLC of the reaction mixture

M #49 RT: 0.90 AV: 1 NL: 4.18E6  
T: FTMS + c ESI Full ms [100.00-800.00]

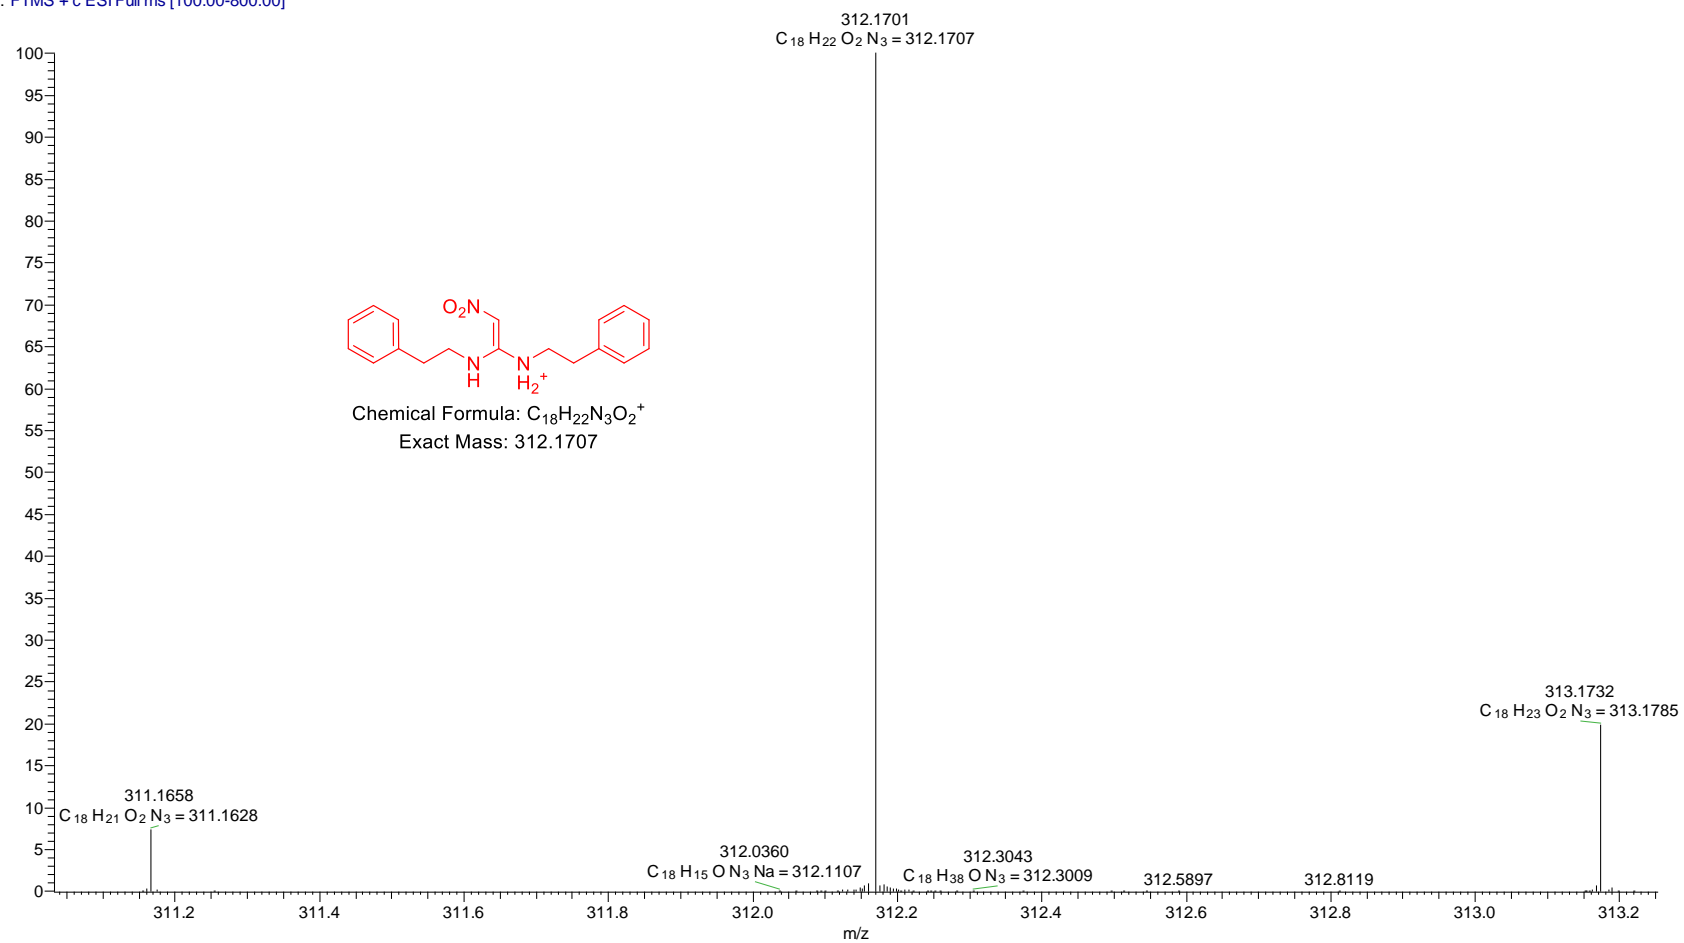

Figure S82. HRMS of substrate **1h**

M#71 RT: 1.28 AV: 1 NL: 3.09E4  
T: FTMS + c ESI Full ms [100.00-800.00]

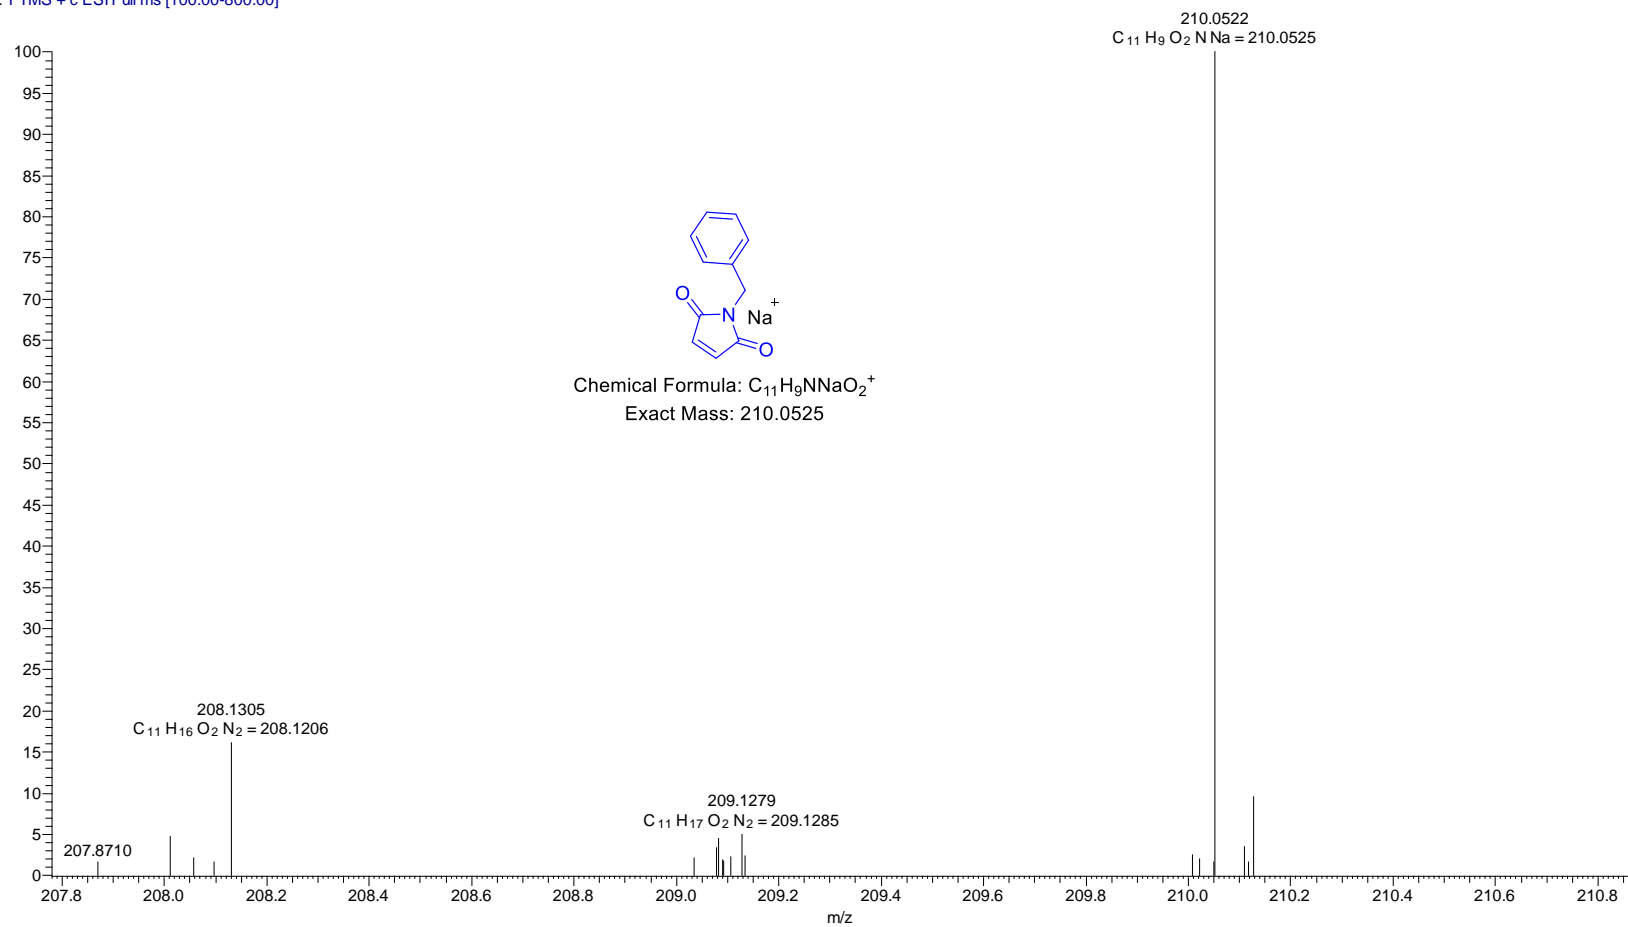

Figure S83. HRMS of substrate 2b

M #33 RT: 0.67 AV: 1 NL: 2.30E5  
T: FTMS + c ESI Full ms [100.00-800.00]

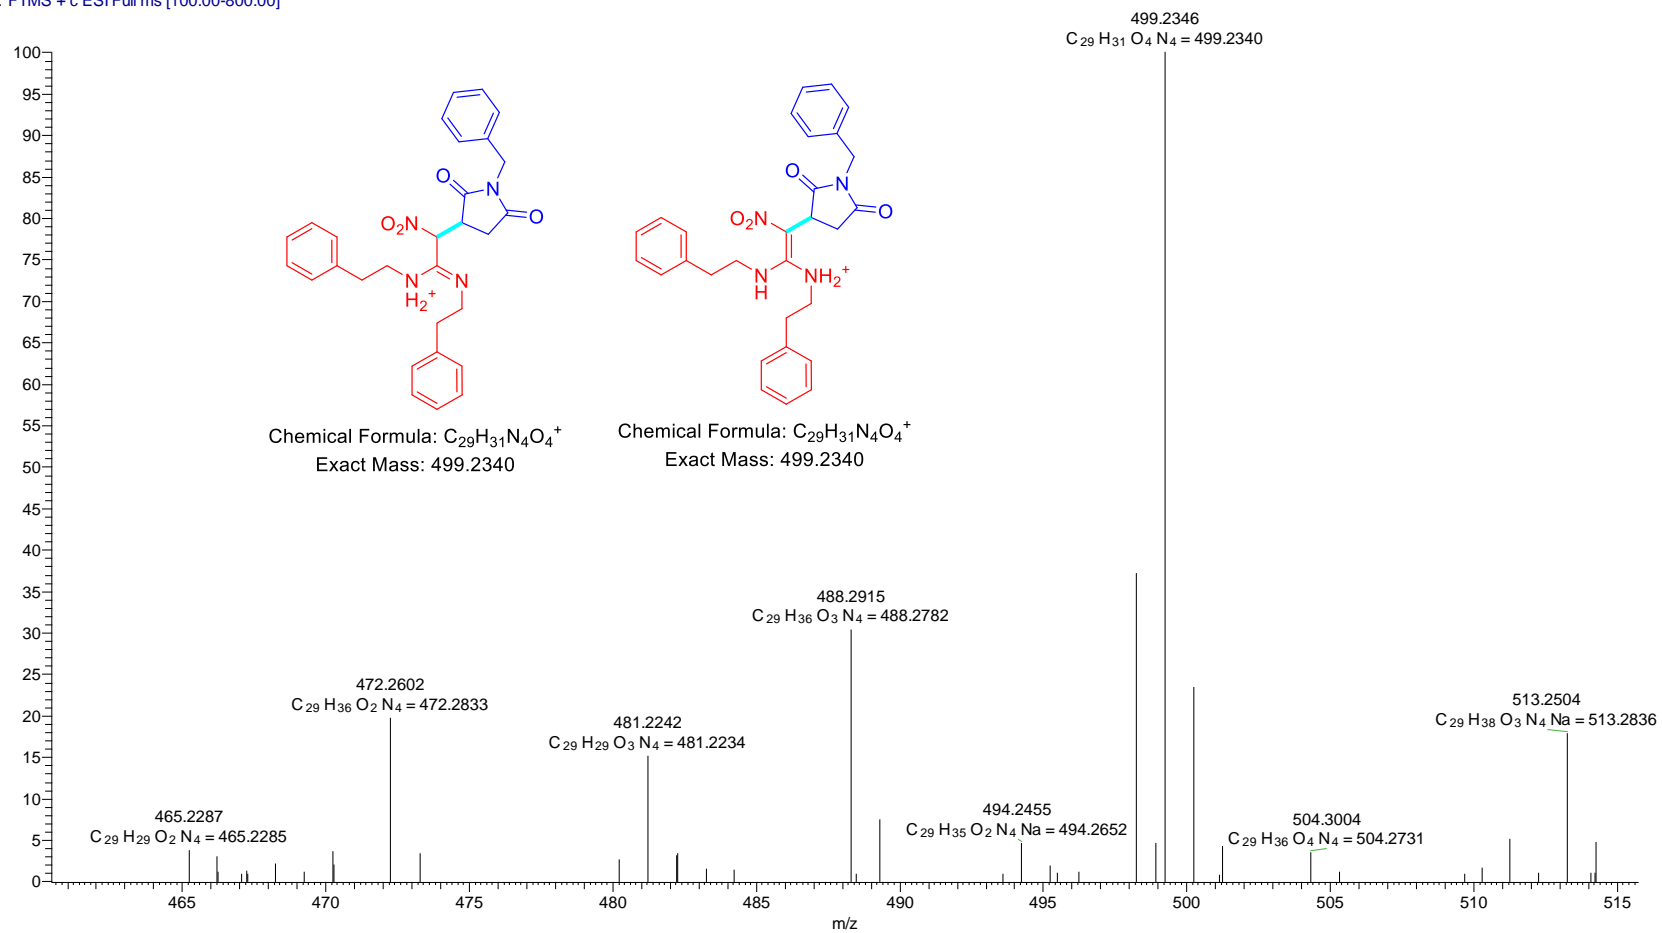

Figure S84. HRMS of intermediate 4n/5n

M#47 RT: 0.89 AV: 1 NL: 1.14E5  
T: FTMS + c ESI Full ms [100.00-800.00]

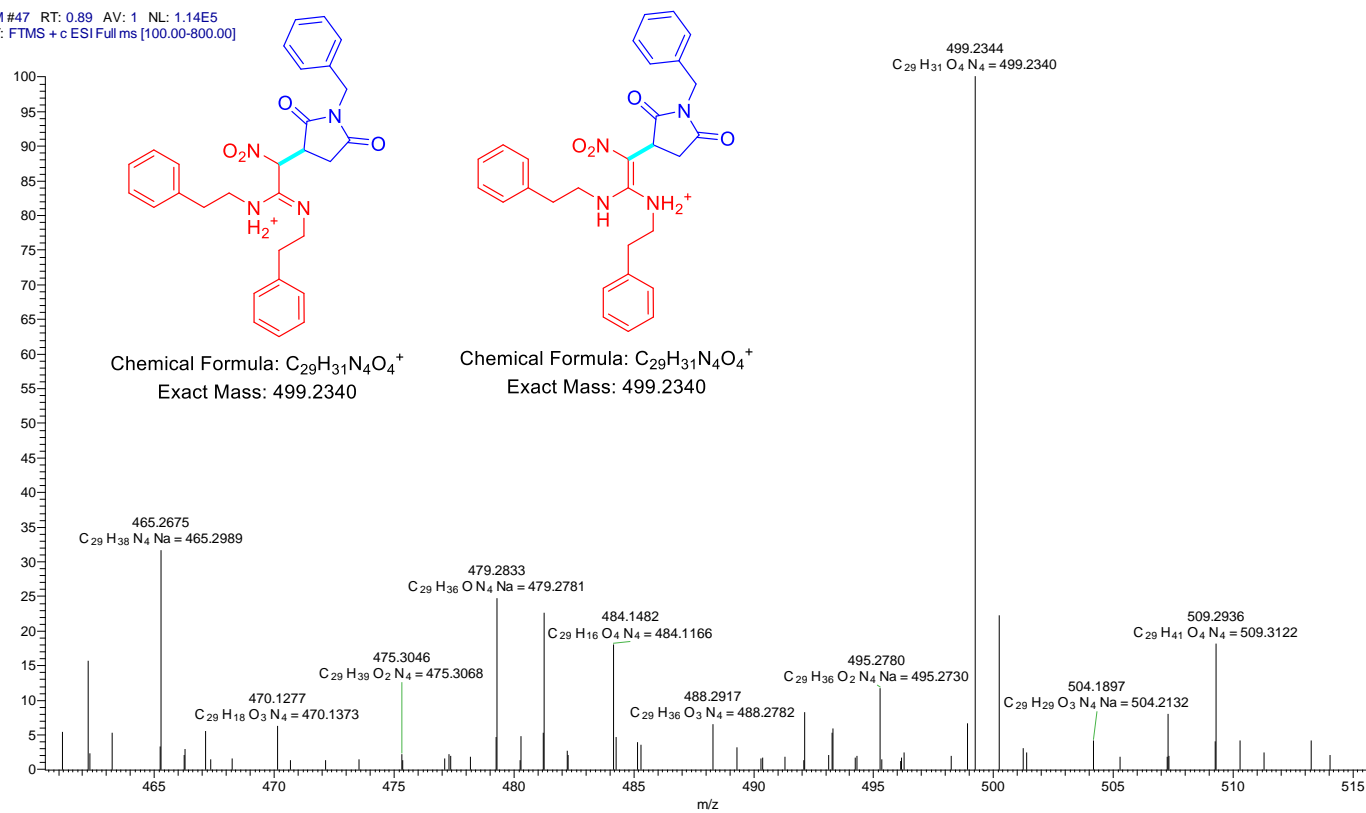

Figure S85. HRMS of intermediate 4n/5n

M#95 RT: 1.78 AV: 1 NL: 1.34E4  
T: FTMS + c ESI Full ms [100.00-800.00]

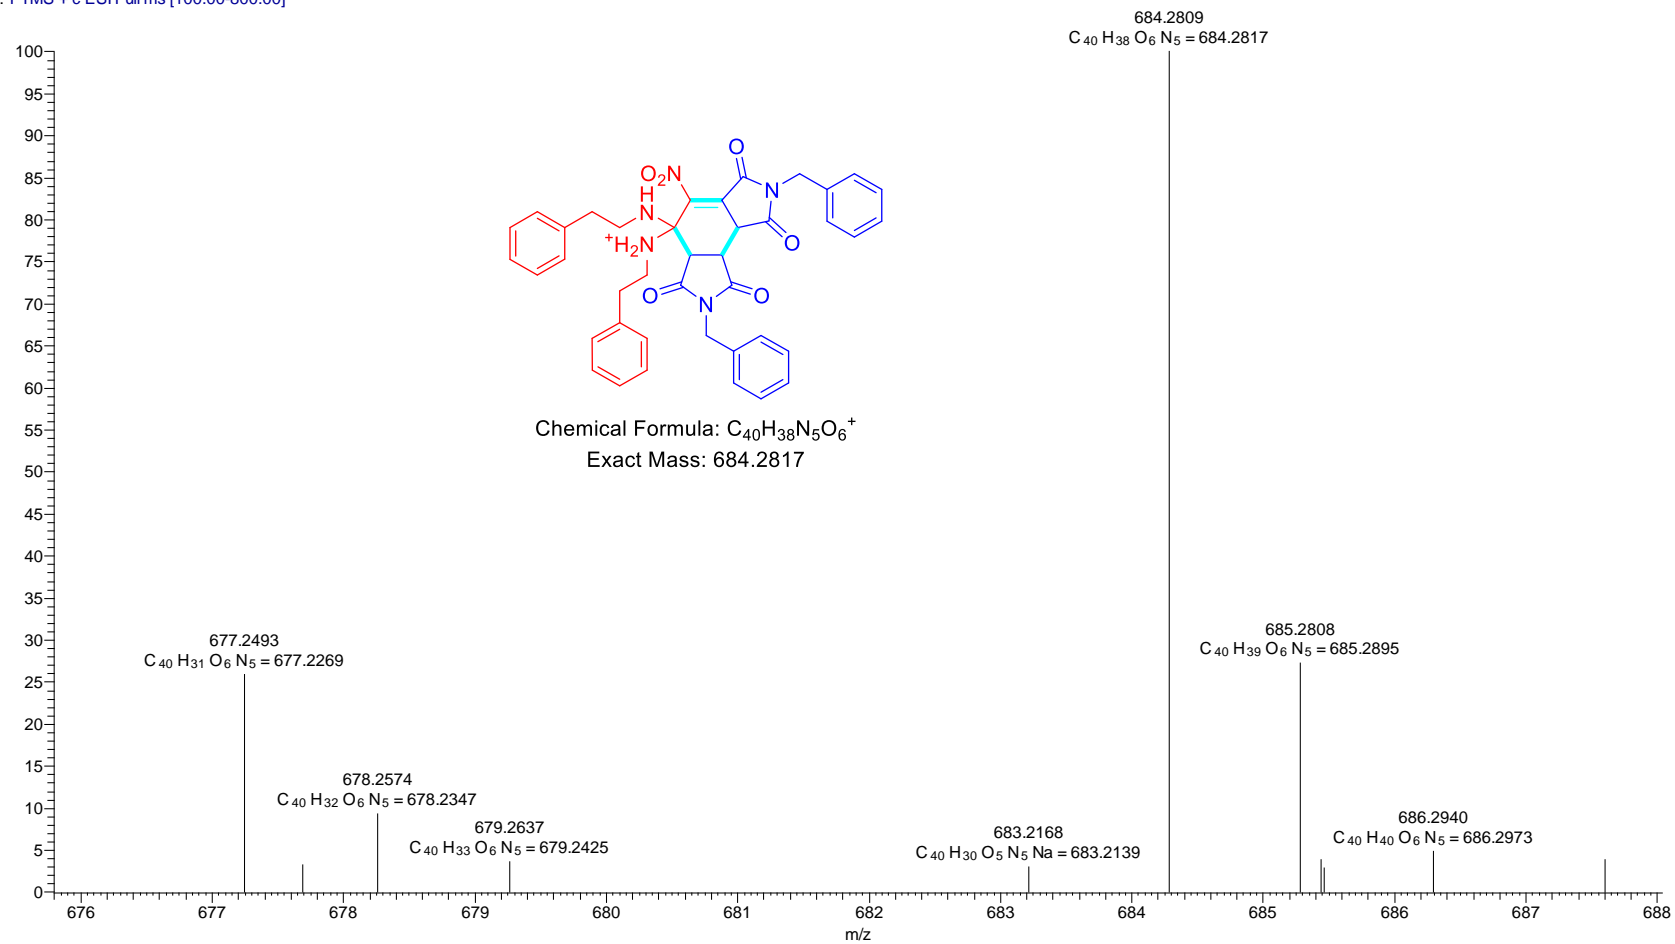

Figure S86. HRMS of intermediate **6n**

M #27 RT: 0.57 AV: 1 NL: 2.02E7  
T: FTMS + c ESI Full ms [100.00-800.00]

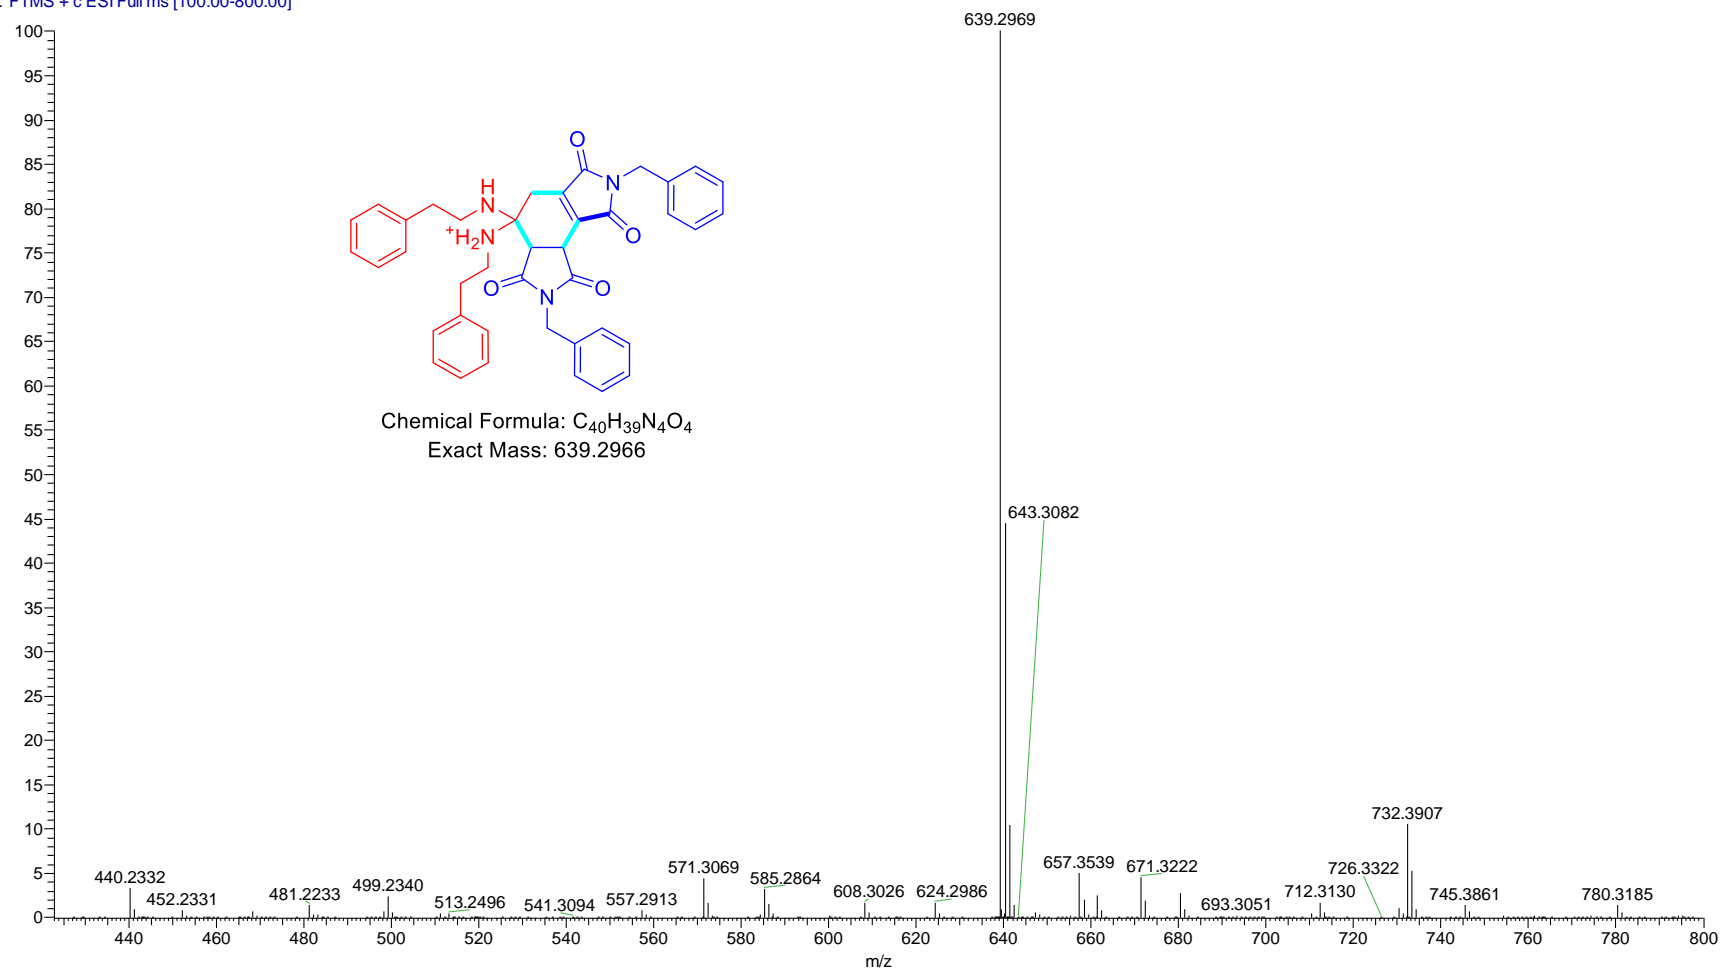

Figure S87. HRMS of intermediate 7n

M#59 RT: 1.06 AV: 1 NL: 2.23E4  
T: FTMS + c ESI Full ms [100.00-800.00]

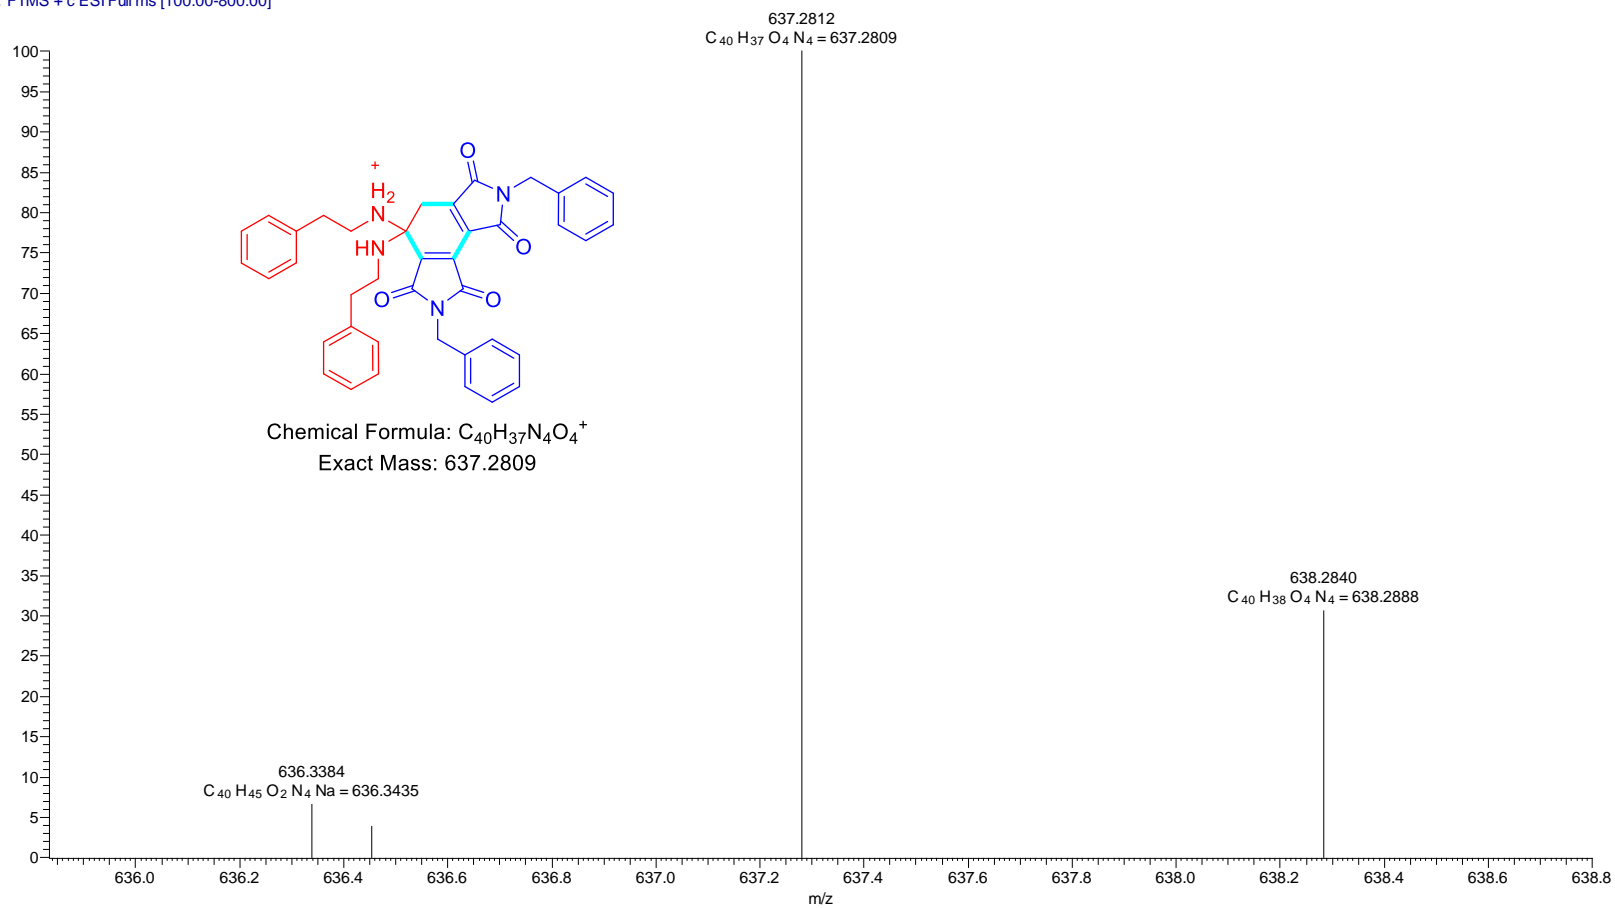

Figure S88. HRMS of intermediate **8n**



M#63 RT: 1.13 AV: 1 NL: 2.85E4  
T: FTMS + c ESI Full ms [100.00-800.00]

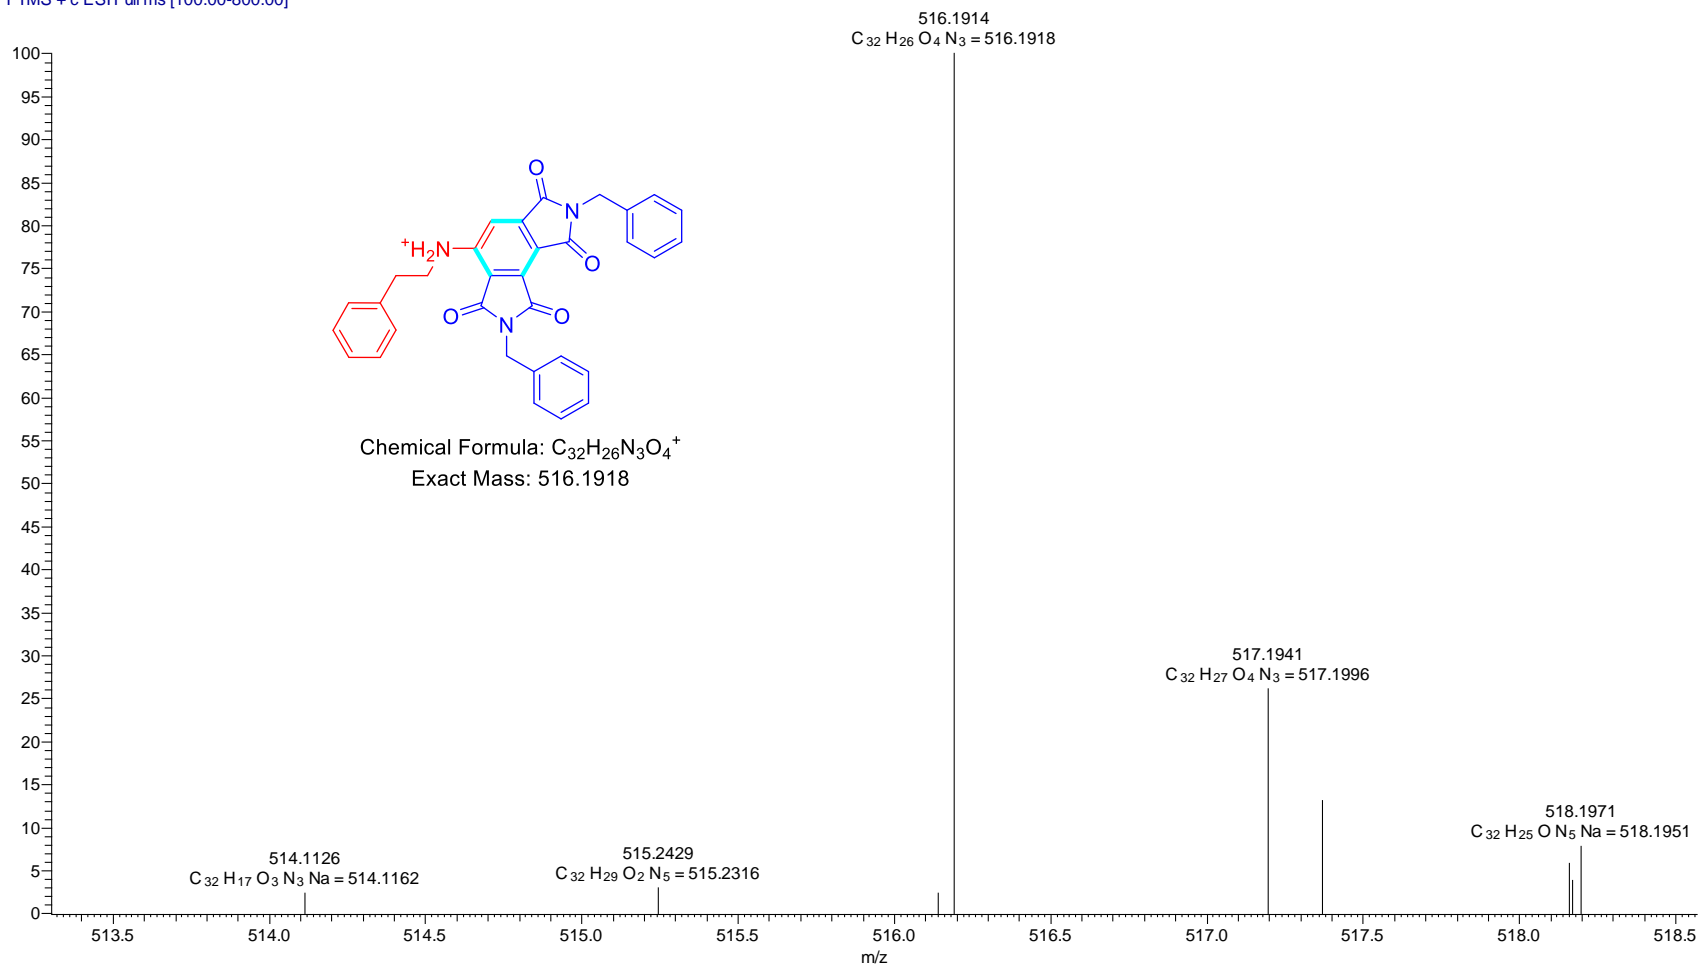

Figure S89. HRMS of the target compound **3n**

## References

1. X.-M. Hu, D.-Y. Luo, Q.-X. Zi, J. Lin, S.-J. Yan, Diastereoselective Synthesis of Morphan Derivatives by Michael and Hetero-Michael Addition of 1,1-Enediamines to Quinone Monoketals, *ACS Omega*, 2018, **3**, 8.
2. CCDC2371133 contain the supplementary crystallographic data for compound **3n**. These data can be obtained free of charge from The Cambridge Crystallographic Data Center *via* [www.ccdc.cam.ac.uk/data\\_request/cif](http://www.ccdc.cam.ac.uk/data_request/cif)
